# Supplementary material for: Ablation of the miRNA Cluster 24 Has Profound Effects on Extracellular Matrix Protein Abundance in Cartilage
Source: MDPI journal article supplement (doi:10.3390/ijms21114112), 2020-06-09
Supplement: s1 [file ijms-762046-Supplemental Table.xlsx]

## Sheet: Supplemental Table 1A
Supplemental Table 1A: List of peptides differentially abundant between femoral epiphyseal cartilage extracts from Col2a1-Cre and Col2a1-Cre-Mirc24tm1M/Y mice
	identifier							(q<0.05; So=0.2)				Means (log2)		Valid Values		LFQ intensities (log2)
id	Protein IDs	Majority protein IDs	Protein names	Gene names	Mol. weight [kDa]	iBAQ (log10)	Peptides	Significant KO_Cre	-Log p-value KO_Cre	q-value KO_Cre	Difference KO_Cre	Mean Cre	Mean KO	Valid values Cre	Valid values KO	Cre_01	Cre_02	Cre_03	Cre_04	Cre_05	KO_06	KO_07	KO_08	KO_09	KO_10
27	A6H5Y3	A6H5Y3	Methionine synthase	Mtr	139.07	7.27418	10	+	4.18711	0.00380952	-1.52387	27.827	NaN	5	0	28.1912	27.6074	27.8823	28.0702	27.384	26.4522	26.256	26.335	25.8256	26.6469
43	C0HKG6;C0HKG5	C0HKG6;C0HKG5			29.608	8.23885	5	+	3.47555	0.00607407	1.65681	NaN	28.2136	0	5	26.3581	26.5518	26.1735	26.7573	26.9432	28.0096	28.1231	28.206	29.0958	27.6335
88	E9PVD3	E9PVD3	Protocadherin-16	Dchs1	346.38	7.07232	6	+	2.94233	0.0173333	-1.42567	28.0583	NaN	5	0	28.8443	28.0827	27.5384	28.1536	27.6724	26.8525	26.3635	26.0735	26.8929	26.9808
124	O08585	O08585	Clathrin light chain A	Clta	25.604	8.32693	2	+	2.7297	0.00748387	2.48353	NaN	28.7537	0	4	25.9007	26.7199	25.7912	24.962	25.8834	28.3158	29.539	28.6787	28.4813	26.6602
135	O08784	O08784	Treacle protein	Tcof1	135	7.4645	6	+	2.34636	0.0199344	-1.77457	28.3449	NaN	5	0	28.1211	27.9984	29.0613	28.3172	28.2267	26.8932	24.9571	26.8584	27.3334	26.8097
145	O08912	O08912	Polypeptide N-acetylgalactosaminyltransferase 1;Polypeptide N-acetylgalactosaminyltransferase 1 soluble form	Galnt1	64.254	7.20455	3	+	2.20222	0.0434419	1.31748	25.3343	NaN	4	0	25.6104	24.9498	25.3955	25.9756	25.3813	26.1594	27.2552	26.018	27.6864	26.781
179	O35345	O35345	Importin subunit alpha-7	Kpna6	59.964	7.9193	7	+	3.07648	0.0056	2.16807	NaN	28.7017	0	4	26.5842	26.2213	25.7668	26.3945	26.0281	29.3518	28.7959	28.0593	27.0282	28.6
190	O35566	O35566	CD151 antigen	Cd151	28.246	8.09008	3	+	2.08077	0.0291268	1.89755	NaN	28.2973	0	4	25.9808	26.693	25.4527	25.4453	27.3916	29.5766	27.6976	28.0531	27.2621	27.8617
214	O35900	O35900	U6 snRNA-associated Sm-like protein LSm2	Lsm2	10.834	8.51532	3	+	2.31048	0.0456264	-1.17542	28.1513	NaN	4	0	28.3161	28.0865	27.539	28.0859	28.1169	27.7035	25.988	27.0471	26.8123	26.7164
289	O88286	O88286	Protein Wiz	Wiz	184.29	7.31614	6	+	2.34101	0.0266269	1.5422	NaN	28.1108	0	4	26.5494	27.03	27.6147	25.9992	25.6654	28.649	28.0323	28.2566	28.1265	27.5054
310	O88696	O88696	ATP-dependent Clp protease proteolytic subunit, mitochondrial	Clpp	29.8	8.24047	4	+	5.01448	0	2.35247	NaN	28.8591	0	5	27.2859	26.2721	26.4257	26.1576	26.3916	29.1913	28.8658	28.7548	29.0528	28.4306
320	O88952;Q8JZS0;O88951	O88952;Q8JZS0	Protein lin-7 homolog C;Protein lin-7 homolog A	Lin7c;Lin7a	21.834	8.29778	5	+	2.73849	0.00717241	2.54166	NaN	29.4309	0	4	27.3687	25.7355	26.9629	25.8904	26.3185	29.0919	29.2545	29.9985	29.3787	27.2607
332	P00493	P00493	Hypoxanthine-guanine phosphoribosyltransferase	Hprt1	24.57	8.86455	11	+	5.01889	0	-3.88152	31.0295	NaN	5	0	30.4968	30.6135	31.4357	31.5098	31.0916	27.0244	26.5897	26.2916	27.9958	27.8383
354	P05202	P05202	Aspartate aminotransferase, mitochondrial	Got2	47.411	7.93779	5	+	3.73563	0.00141176	2.43717	NaN	29.0265	0	5	27.7215	25.9676	26.5343	26.2271	26.4964	29.3197	29.6174	29.1212	28.7084	28.3659
357	P05622	P05622	Platelet-derived growth factor receptor beta	Pdgfrb	122.79	8.74125	2	+	2.18133	0.0106341	4.36464	NaN	31.6742	0	4	26.5835	25.6124	26.6891	25.7114	26.0616	25.7843	31.5287	31.6766	31.769	31.7227
399	P09542	P09542	Myosin light chain 3	Myl3	22.421	8.26656	8	+	2.58388	0.0105714	2.25249	NaN	29.3875	0	4	26.4128	26.8198	27.9704	26.8026	25.812	29.8023	29.2207	29.2813	29.2457	27.5299
402	P09671	P09671	Superoxide dismutase [Mn], mitochondrial	Sod2	24.603	8.06674	4	+	2.46361	0.0191186	1.64268	NaN	28.3262	0	5	26.5877	27.0636	26.2709	26.8098	26.6857	29.5159	27.9645	28.8939	27.7476	27.5091
439	P12025	P12025	Midkine	Mdk	15.434	8.27644	6	+	1.91032	0.0401928	1.8593	NaN	28.1088	0	4	26.5327	26.1979	25.1503	27.4946	25.2286	27.4654	27.6507	28.0245	29.4252	27.3349
470	P15089	P15089	Mast cell carboxypeptidase A	Cpa3	48.789	7.92908	4	+	2.64265	0.0168	1.68958	NaN	28.2184	0	5	27.3236	25.8217	26.447	26.4107	26.6408	29.1654	27.7982	27.5735	27.9007	28.654
534	P21844	P21844	Chymase	Cma1	27.586	8.33199	5	+	2.70528	0.0103256	2.00714	NaN	29.2811	0	4	26.6929	26.9318	28.3876	26.323	26.8135	29.3092	28.9125	28.0599	29.6205	29.2823
555	P24788	P24788	Cyclin-dependent kinase 11B	Cdk11b	91.512	7.71305	7	+	2.28347	0.0287536	-1.56294	28.4111	NaN	5	0	28.7217	28.6447	27.6614	29.0333	27.9946	26.7422	27.4084	25.6342	27.3149	27.1411
579	P27612	P27612	Phospholipase A-2-activating protein	Plaa	87.22	7.9379	10	+	4.16504	0.001	-3.1075	29.3924	NaN	5	0	28.8852	29.5192	30.466	28.8849	29.2066	26.5389	27.2343	25.8921	25.523	26.2361
608	P29788	P29788	Vitronectin	Vtn	54.848	8.11494	3	+	4.54025	0.000727273	2.20275	NaN	28.6641	0	5	26.7145	26.03	26.8239	26.8715	25.8669	29.179	28.4442	28.3876	28.8261	28.4837
630	P33435	P33435	Collagenase 3	Mmp13	54.181	7.97098	11	+	2.44717	0.0172766	2.09252	NaN	29.0444	0	5	26.4646	26.4693	28.1484	26.4028	27.2744	29.9231	27.9605	28.3078	29.6563	29.3745
700	P45377;P21300	P45377	Aldose reductase-related protein 2	Akr1b8	36.12	8.17173	3	+	4.18642	0.0016	2.13262	NaN	28.6943	0	5	26.9385	26.439	26.782	26.8075	25.8412	28.6179	28.5928	28.3082	29.466	28.4865
826	P56382	P56382	ATP synthase subunit epsilon, mitochondrial	Atp5e	5.8378	9.0924	3	+	5.34934	0	2.74461	NaN	29.565	0	5	26.8964	26.7759	26.8231	27.423	26.1836	29.3912	29.805	29.919	29.6651	29.0448
955	P62869	P62869	Transcription elongation factor B polypeptide 2	Tceb2	13.17	8.84649	6	+	1.74706	0.0461333	-2.14836	29.2687	NaN	4	0	28.9009	28.9124	29.3734	29.888	26.5112	27.7646	25.6868	25.75	26.2182	27.4246
957	P62878	P62878	E3 ubiquitin-protein ligase RBX1;E3 ubiquitin-protein ligase RBX1, N-terminally processed	Rbx1	12.274	9.28785	2	+	2.0594	0.0197091	-2.83612	29.6527	29.9097	5	1	30.1718	29.4887	28.7762	30.0095	29.8172	25.8222	26.4878	25.7288	26.1342	29.9097
1129	P99026	P99026	Proteasome subunit beta type-4	Psmb4	29.116	8.13691	4	+	2.44708	0.0164706	1.99287	NaN	28.5762	0	4	27.2088	26.3039	26.0775	25.4114	26.1512	28.1307	28.9911	28.9567	26.8124	28.2262
1207	Q08775;Q64131	Q08775;Q64131	Runt-related transcription factor 2;Runt-related transcription factor 3	Runx2;Runx3	66.204	7.78159	4	+	2.13338	0.0298947	-1.70988	27.9235	NaN	5	0	27.1968	27.7242	28.316	27.5299	28.8509	26.7198	26.4124	24.7247	26.7573	26.4541
1218	Q11011	Q11011	Puromycin-sensitive aminopeptidase	Npepps	103.32	8.25227	14	+	2.25352	0.030961	-1.49195	30.54	29.048	5	5	30.4279	30.1492	30.6815	30.2279	31.2134	29.6309	28.2239	29.231	28.2508	29.9035
1223	Q91VK1;Q2L4X1	Q91VK1;Q2L4X1	Basic leucine zipper and W2 domain-containing protein 2	Bzw2	48.063	7.71608	4	+	2.7749	0.0234375	-1.23733	27.8581	NaN	4	0	27.8486	27.7202	28.1108	27.7527	27.6334	26.3778	26.3342	26.4695	27.5676	26.1299
1245	Q3TIV5	Q3TIV5	Zinc finger CCCH domain-containing protein 15	Zc3h15	48.327	7.60525	6	+	2.44694	0.0212698	1.57656	NaN	27.9069	0	4	25.9901	26.6043	26.461	25.4185	25.8848	27.1676	28.1987	28.2425	28.0188	26.6139
1252	Q3TMW1	Q3TMW1	Coiled-coil domain-containing protein 102A	Ccdc102a	62.623	7.70996	4	+	2.5821	0.0105	2.32227	NaN	28.4339	0	5	26.5134	25.86	25.9343	27.5534	24.6973	28.6456	28.9391	28.9978	27.9685	27.6186
1344	Q4QY64	Q4QY64	ATPase family AAA domain-containing protein 5	Atad5	203.91	8.90004	1	+	11.434	0	7.42571	NaN	33.8332	0	5	26.2523	26.2827	26.4689	26.3417	26.6918	33.5443	33.9442	34.012	33.7688	33.8967
1358	Q59J78	Q59J78	Mimitin, mitochondrial	Ndufaf2	19.628	8.28369	4	+	2.96423	0.00583333	2.53905	NaN	29.4863	0	4	25.9237	26.6234	26.4542	26.3209	27.1947	29.0978	29.2904	29.9286	29.6283	27.2672
1383	Q5SVD0	Q5SVD0	Filamin-interacting protein FAM101B	Fam101b	23.379	8.68595	4	+	2.03747	0.0457727	1.48182	NaN	28.4459	0	4	26.6358	26.5662	27.0921	25.7572	27.1631	27.936	28.8479	28.5873	26.84	28.4124
1413	Q60739	Q60739	BAG family molecular chaperone regulator 1	Bag1	39.74	7.90796	3	+	2.19384	0.0264	1.79721	NaN	28.1439	0	4	25.7574	26.8134	26.6156	25.0948	25.9713	28.1235	29.0293	27.6818	26.6628	27.7412
1446	Q61043	Q61043	Ninein	Nin	243.72	7.61463	2	+	2.10973	0.0195789	2.49017	NaN	29.4336	0	4	25.526	26.0248	26.7465	26.8248	27.4639	28.3242	29.046	29.2967	31.0674	27.3026
1519	Q61711	Q61711	Bone sialoprotein 2	Ibsp	35.734	9.18636	4	+	2.97299	0.007625	1.97314	28.9465	30.9197	5	5	29.0875	29.3572	28.2107	28.173	29.9043	31.253	30.879	30.8147	31.4335	30.2182
1520	Q61735	Q61735	Leukocyte surface antigen CD47	Cd47	33.097	8.52359	3	+	2.67531	0.00693333	2.72706	NaN	29.3848	0	4	25.7661	25.4027	26.0395	26.8926	26.6524	29.9452	26.8496	28.7562	29.6461	29.1916
1531	Q61851;Q03142;P21803;P35969;P35918	Q61851	Fibroblast growth factor receptor 3	Fgfr3	87.757	7.80473	6	+	2.18446	0.0286027	-1.67537	28.6652	NaN	4	0	28.0745	28.5439	27.7816	28.6628	29.3797	26.6018	28.0258	26.8869	26.8357	25.7155
1543	Q62077	Q62077	1-phosphatidylinositol 4,5-bisphosphate phosphodiesterase gamma-1	Plcg1	149.67	7.37003	9	+	2.56275	0.0312821	-1.19498	27.9497	NaN	5	0	27.6553	27.8168	28.3853	27.6796	28.2113	26.3805	27.64	26.2987	26.7149	26.7394
1571	Q62417	Q62417	Sorbin and SH3 domain-containing protein 1	Sorbs1	143.07	7.28852	9	+	4.19337	0.00294737	-1.72811	27.9955	NaN	5	0	28.2662	27.7381	28.5193	27.9028	27.5509	26.3522	25.7697	26.5799	26.1429	26.492
1588	Q63918	Q63918	Serum deprivation-response protein	Sdpr	46.763	7.96838	6	+	2.24263	0.0169796	2.64531	NaN	29.4364	0	4	25.6603	26.507	27.2918	26.6547	25.0937	29.5927	29.7338	29.8253	28.5937	26.6884
1650	Q6NS46	Q6NS46	Protein RRP5 homolog	Pdcd11	207.78	8.05358	10	+	4.64372	0	-3.02132	30.4751	NaN	5	0	29.8982	30.6873	30.5484	29.9727	31.2687	27.4637	28.3449	27.2939	27.189	26.9772
1682	Q6P8J7;P30275	Q6P8J7	Creatine kinase S-type, mitochondrial	Ckmt2	47.473	7.86958	6	+	2.89421	0.0125333	1.6534	NaN	28.0535	0	5	26.617	26.4254	26.8451	25.8164	26.2968	28.6672	28.0267	27.7181	27.1506	28.7051
1751	Q6ZWZ2	Q6ZWZ2	Ubiquitin-conjugating enzyme E2 R2	Ube2r2	27.166	8.24878	3	+	4.03216	0.0028	1.81611	NaN	28.4833	0	5	26.4218	26.9387	26.7695	26.5439	26.6621	28.1065	29.2836	28.6431	28.4527	27.9306
1762	Q78PG9	Q78PG9	Coiled-coil domain-containing protein 25	Ccdc25	24.48	8.26107	5	+	2.12426	0.0374815	-1.52054	28.4796	NaN	5	0	28.1579	28.2862	28.4926	28.863	28.5984	28.0203	27.3726	27.3719	25.7719	26.2587
1835	Q80W93	Q80W93	Hydrocephalus-inducing protein	Hydin	581.52	6.97442	2	+	2.86008	0.0124545	-1.70702	28.649	NaN	4	0	27.7168	28.1357	29.3271	28.6328	28.5004	27.6084	26.7705	26.4563	26.2217	26.7209
1931	Q8BIQ5;Q8C7E9	Q8BIQ5;Q8C7E9	Cleavage stimulation factor subunit 2;Cleavage stimulation factor subunit 2 tau variant	Cstf2;Cstf2t	61.341	7.78871	3	+	2.33551	0.0193333	1.98085	NaN	28.3097	0	5	28.0255	26.1695	26.3703	25.3337	25.7452	27.8281	28.1352	28.283	29.129	28.1732
1987	Q8BPK2	Q8BPK2		Zcchc3	43.77	7.79687	3	+	2.28025	0.0194483	1.97781	NaN	28.5776	0	4	27.2007	26.7158	26.6178	24.6281	27.0689	29.0841	28.0829	28.7758	28.3678	27.8098
2012	Q8BU25	Q8BU25	Inactive serine protease PAMR1	Pamr1	80.319	7.79823	4	+	3.54033	0.00714286	-1.5369	28.5537	NaN	5	0	28.5468	28.4592	29.0724	28.3697	28.3202	26.9633	27.2217	27.7003	26.4563	26.7423
2017	Q8BUK6	Q8BUK6	Protein Hook homolog 3	Hook3	83.217	8.03858	10	+	3.92452	0.00184615	2.57203	NaN	29.5577	0	5	27.1651	26.7206	26.9597	27.5778	26.5052	29.0392	30.2489	30.4069	29.2321	28.8616
2018	Q8BUV3	Q8BUV3	Gephyrin;Molybdopterin adenylyltransferase;Molybdopterin molybdenumtransferase	Gphn	83.281	7.67197	10	+	3.2828	0.00788571	-1.58265	28.2004	NaN	5	0	28.3022	28.0678	28.6616	27.978	27.9925	26.1679	27.4807	26.6868	26.0553	26.6982
2079	Q8C181	Q8C181	Muscleblind-like protein 2	Mbnl2	40.156	8.58152	9	+	4.81996	0	3.37719	NaN	29.645	0	5	25.8388	27.3678	26.3297	25.4809	26.3221	29.8659	30.0247	29.7274	29.6298	28.9774
2084	Q8C460	Q8C460	ERI1 exoribonuclease 3	Eri3	37.189	7.85534	3	+	2.12647	0.0292	1.80304	NaN	28.0253	0	4	26.0001	26.0837	26.447	26.4457	24.7282	27.94	27.8056	27.3236	29.032	26.6187
2240	Q8K2T8	Q8K2T8	RNA polymerase II-associated factor 1 homolog	Paf1	60.518	7.78046	6	+	2.30048	0.0197333	-1.87014	28.5838	NaN	4	0	28.1043	26.7872	28.5221	29.0769	28.6321	27.3558	25.8301	25.7306	26.5403	26.3153
2287	Q8R0S2;Q5DU25	Q8R0S2	IQ motif and SEC7 domain-containing protein 1	Iqsec1	108.01	7.58514	7	+	3.16468	0.01	-1.54676	28.1697	NaN	5	0	28.6258	28.3332	28.0863	27.7124	28.0909	26.383	25.8085	27.201	26.7113	27.0111
2306	Q8R2Y2	Q8R2Y2	Cell surface glycoprotein MUC18	Mcam	71.545	7.49321	5	+	2.28432	0.0437619	1.24613	NaN	27.4044	0	5	26.8921	25.4671	25.3247	26.4709	26.6365	27.2878	27.5712	27.2851	27.5953	27.2825
2345	Q8VBV7	Q8VBV7	COP9 signalosome complex subunit 8	Cops8	23.255	8.23183	3	+	4.65139	0.0008	2.117	NaN	28.2603	0	4	26.6787	25.933	26.0767	25.3926	26.4017	28.1684	28.0312	28.2578	28.5839	28.0264
2357	Q8VCN9	Q8VCN9	Tubulin-specific chaperone C	Tbcc	38.124	7.89437	3	+	3.24286	0.00538462	-1.90806	27.9703	NaN	5	0	28.6608	28.4413	28.17	27.2483	27.3311	26.476	25.5484	25.8507	25.896	26.5401
2360	Q8VD04	Q8VD04	GRIP1-associated protein 1	Gripap1	92.714	7.40494	3	+	2.97717	0.0100541	1.75098	NaN	28.4085	0	5	26.959	26.2048	26.6743	27.4764	25.973	29.0558	28.4216	28.672	28.1733	27.7198
2419	Q91VA6	Q91VA6	Polymerase delta-interacting protein 2	Poldip2	41.87	8.26489	10	+	2.23079	0.0196226	-2.25137	29.4906	29.4335	5	1	28.9113	29.4951	29.2526	30.0123	29.7816	26.5029	29.4335	26.3445	27.3202	26.5948
2427	Q91VJ2	Q91VJ2	Protein kinase C delta-binding protein	Prkcdbp	27.853	8.60808	8	+	1.98982	0.0405854	1.69208	28.1194	29.8115	5	5	28.5814	28.0093	29.2401	27.5092	27.2568	29.3709	30.1892	30.3565	30.5154	28.6253
2465	Q91X78	Q91X78	Erlin-1	Erlin1	39.182	7.86776	6	+	2.71083	0.0101538	2.09632	NaN	28.8324	0	4	26.842	26.3428	27.254	25.9442	25.7396	28.6691	28.6079	27.2745	29.5904	28.4624
2477	Q91YE6	Q91YE6	Importin-9	Ipo9	116.05	7.70871	5	+	3.76393	0.00608696	-1.5756	27.7139	NaN	5	0	27.8904	27.7683	28.0114	27.357	27.5422	26.1184	26.5799	26.5755	25.474	25.9434
2570	Q924M7	Q924M7	Mannose-6-phosphate isomerase	Mpi	46.575	7.9735	7	+	1.95503	0.0441379	-1.66146	28.4251	NaN	4	0	26.5281	28.8239	27.6708	28.0941	29.1117	25.7415	26.8162	26.783	26.0172	26.5634
2644	Q99LD8	Q99LD8	N(G),N(G)-dimethylarginine dimethylaminohydrolase 2	Ddah2	29.645	8.53157	8	+	2.41875	0.0289412	1.40909	28.6988	30.1079	5	5	28.7485	28.3506	29.55	28.6774	28.1677	29.9985	30.038	29.9421	31.0603	29.5008
2661	Q99LS3	Q99LS3	Phosphoserine phosphatase	Psph	25.096	8.07298	4	+	2.30573	0.0297067	-1.46972	27.7716	NaN	5	0	27.9095	27.7631	27.7839	27.7052	27.6961	26.0876	26.1092	25.0806	27.1036	27.1283
2671	Q99ME9	Q99ME9	Nucleolar GTP-binding protein 1	Gtpbp4	74.112	7.83246	8	+	3.20533	0.006	2.13295	NaN	28.4103	0	5	27.1144	26.753	26.3676	25.4483	25.7033	28.5129	27.8983	28.4444	27.9694	29.2262
2701	Q9CPT3;REV__CON__P02672	Q9CPT3	N-acylneuraminate-9-phosphatase	Nanp	27.808	8.03423	5	+	2.05537	0.0261212	2.11914	NaN	28.7887	0	4	24.9172	26.9036	26.7617	26.145	26.1975	28.3554	28.5881	29.1141	29.0973	26.366
2714	Q9CQ26	Q9CQ26	STAM-binding protein	Stambp	48.513	7.94087	6	+	2.77024	0.0216129	1.28042	NaN	27.937	0	5	26.6281	26.7446	26.4735	26.2905	27.146	27.4147	27.8996	27.9113	27.6507	28.8087
2730	Q9CQF3	Q9CQF3	Cleavage and polyadenylation specificity factor subunit 5	Nudt21	26.24	8.80653	5	+	2.35265	0.03595	1.2892	29.4617	30.7509	5	5	29.5638	29.9445	29.9724	29.5304	28.2973	30.7689	30.6419	30.6346	31.2115	30.4975
2737	Q9CQJ8	Q9CQJ8	NADH dehydrogenase [ubiquinone] 1 beta subcomplex subunit 9	Ndufb9	21.984	8.83109	8	+	4.24418	0.000888889	2.58532	NaN	29.6789	0	5	27.0804	27.7212	26.9837	26.8265	26.8562	29.5341	30.675	29.715	29.6276	28.843
2771	Q9CRA5	Q9CRA5	Golgi phosphoprotein 3	Golph3	33.752	8.44364	6	+	2.67099	0.00739394	2.54217	NaN	29.6026	0	5	27.3845	27.3254	27.8521	25.121	27.6192	30.1886	29.9519	29.6108	29.7369	28.5249
2790	Q9CWI3	Q9CWI3	BRCA2 and CDKN1A-interacting protein	Bccip	35.942	8.19576	6	+	2.79137	0.0164615	-1.50056	29.0311	27.5306	5	5	29.0175	28.8919	28.6234	29.1083	29.5146	27.1965	27.5189	26.6487	28.1112	28.1777
2799	Q9CWZ3	Q9CWZ3	RNA-binding protein 8A	Rbm8a	19.889	8.66041	5	+	3.53253	0.0015	3.15184	NaN	29.567	0	5	27.6554	26.4154	26.521	26.79	24.694	29.215	29.6684	29.3969	30.2554	29.2994
2857	Q9D0A3	Q9D0A3	Arpin	Arpin	25.193	8.43115	4	+	4.23752	0.000666667	2.35049	NaN	29.1045	0	5	27.0185	26.1958	27.2581	27.0212	26.2765	28.661	29.0257	29.5035	29.6966	28.6357
2858	Q9D0B0	Q9D0B0	Serine/arginine-rich splicing factor 9	Srsf9	25.661	8.09499	6	+	2.54601	0.0146087	2.06268	NaN	28.88	0	4	25.9039	26.6505	26.4527	26.204	27.4874	28.3557	29.6043	29.4661	27.492	28.0938
2859	Q9D0B6	Q9D0B6	Protein PBDC1	Pbdc1	22.223	8.3593	4	+	2.31962	0.0197857	1.91361	NaN	28.5906	0	5	26.9106	26.488	28.3812	26.1989	25.4059	28.8227	28.5437	28.4906	28.5459	28.5499
2898	Q9D287	Q9D287	Pre-mRNA-splicing factor SPF27	Bcas2	26.131	8.00212	3	+	1.92266	0.0317468	2.11164	NaN	29.0892	0	4	27.159	25.2845	27.937	25.5935	26.88	28.7044	29.4211	28.9942	29.2372	27.0553
2981	Q9DB60	Q9DB60	Prostamide/prostaglandin F synthase	Fam213b	21.67	8.15564	4	+	4.28835	0.00171429	2.06804	NaN	28.5728	0	5	26.2741	27.2028	26.3699	26.7636	25.9136	28.6754	28.696	28.9187	28.5275	28.0467
3091	Q9ES97	Q9ES97	Reticulon-3	Rtn3	103.88	7.89814	2	+	3.47067	0.00266667	-2.54189	28.7459	NaN	5	0	30.0786	28.8536	28.3678	27.9853	28.4442	26.972	26.3158	25.7871	26.2509	25.6944
3101	Q9ET01	Q9ET01	Glycogen phosphorylase, liver form	Pygl	97.462	8.41472	25	+	2.19823	0.0456087	-1.26183	30.9532	29.6914	5	5	30.901	31.5238	31.002	30.2476	31.0916	30.2364	28.657	29.6749	29.8328	30.0559
3175	Q9JM99	Q9JM99	Proteoglycan 4;Proteoglycan 4 C-terminal part	Prg4	115.99	8.58538	5	+	6.13136	0	5.1603	NaN	31.9202	0	5	27.0241	26.6883	25.7578	27.8528	26.4763	32.1816	32.2178	32.0559	31.6966	31.449
3209	Q9QY36;Q3UX61	Q9QY36;Q3UX61	N-alpha-acetyltransferase 10;N-alpha-acetyltransferase 11	Naa10;Naa11	26.519	8.5447	7	+	1.84756	0.0432471	1.94378	28.5331	29.9313	4	5	28.6381	28.278	25.8054	28.8481	28.3682	29.4551	30.8794	30.2619	29.681	29.3793
3242	Q9R008	Q9R008	Mevalonate kinase	Mvk	41.877	8.08508	1	+	2.95294	0.00811765	1.94002	NaN	28.87	0	4	27.4718	26.2855	27.1198	25.821	27.2762	28.1907	29.3303	28.9941	28.9649	28.1944
3257	Q9R0I7	Q9R0I7	YLP motif-containing protein 1	Ylpm1	155.13	7.24286	6	+	2.64431	0.029	1.20062	NaN	27.9799	0	5	27.4855	26.4403	26.635	26.8562	26.4794	28.4018	28.026	28.1516	28.0726	27.2474
3263	Q9R0P3	Q9R0P3	S-formylglutathione hydrolase	Esd	31.319	9.21373	15	+	2.79156	0.0459775	-0.932042	31.8431	30.9111	5	5	32.0313	31.6585	31.5525	31.8391	32.1343	30.4535	31.0276	30.5889	31.3244	31.161
3295	Q9WTP6	Q9WTP6	Adenylate kinase 2, mitochondrial;Adenylate kinase 2, mitochondrial, N-terminally processed	Ak2	26.468	8.72734	7	+	2.13485	0.0482151	1.29707	29.1056	30.4027	5	5	28.7364	29.4276	30.1816	28.34	28.8425	30.5961	30.4861	30.614	30.5968	29.7205
3313	Q9WUD1	Q9WUD1	STIP1 homology and U box-containing protein 1	Stub1	34.909	8.58091	12	+	2.45275	0.0284865	1.34164	29.2575	30.5992	5	5	28.7782	30.0358	29.803	28.8144	28.8562	30.0107	31.0812	30.8137	30.6862	30.4041
3326	Q9WUZ5	Q9WUZ5	Troponin I, slow skeletal muscle	Tnni1	21.698	8.38562	3	+	2.71348	0.00922222	2.277	NaN	28.494	0	5	25.9877	27.0615	26.1806	25.2235	26.6317	29.5734	28.3775	27.855	29.1971	27.4671

## Sheet: Supplemental Table 1B
Supplemental Table 1B: List of all peptides identified in femoral epiphyseal cartilage extracts from Col2a1-Cre and Col2a1-Cre-Mirc24tm1M/Y mice
								(q<0.05; So=0.2)				Means (log2)		Valid Values		LFQ intensities (log2)
id	Protein IDs	Majority protein IDs	Protein names	Gene names	Mol. weight [kDa]	iBAQ (log10)	Peptides	Significant KO_Cre	-Log p-value KO_Cre	q-value KO_Cre	Difference KO_Cre	Mean Cre	Mean KO	Valid values Cre	Valid values KO	Cre_01	Cre_02	Cre_03	Cre_04	Cre_05	KO_06	KO_07	KO_08	KO_09	KO_10
2	A2A6A1;A2AKY4	A2A6A1	G patch domain-containing protein 8	Gpatch8	164.99	7.23882	5		1.52002	0.122312	-1.24852	28.014	NaN	5	0	27.6594	27.8898	28.0662	28.435	28.0198	25.1026	26.7238	27.6194	26.785	27.5967
3	A2A8Z1	A2A8Z1	Oxysterol-binding protein-related protein 9	Osbpl9	83.108	7.39792	3		0.872133	0.481064	-0.459601	26.7436	26.2757	4	5	26.391	26.7022	26.3868	26.7398	27.4568	25.8758	26.4976	25.8093	26.3473	26.8486
5	A2AAJ9	A2AAJ9	Obscurin	Obscn	966.58	7.19797	14		0.0319665	0.981575	-0.091193	28.9524	29.5131	5	4	30.7938	30.5987	28.2721	27.8498	27.2476	30.0923	29.2685	26.2535	29.1774	29.5144
8	A2ADY9;Q9DAF3	A2ADY9	Protein DDI1 homolog 2	Ddi2	44.59	7.86161	7		0.0897313	0.950396	0.0938202	27.5699	27.8175	5	4	27.1838	27.0599	27.7018	28.6679	27.2363	27.3903	27.4723	27.9398	28.4677	27.0487
11	A2ALS5	A2ALS5	Rap1 GTPase-activating protein 1	Rap1gap	73.432	7.68063	6		0.729762	0.475714	-0.607704	28.123	28.1246	5	2	27.9307	27.4408	28.3289	28.5524	28.3624	27.7955	27.5393	27.0101	28.7098	26.5218
13	A2AMM0	A2AMM0	Muscle-related coiled-coil protein	Murc	41.008	8.23885	4		1.25062	0.201504	1.0836	28.189	28.5675	2	5	27.2934	28.1206	27.1725	28.2575	26.5757	29.6919	28.28	27.6486	29.1372	28.0799
15	A2AQ19	A2AQ19	RNA polymerase-associated protein RTF1 homolog	Rtf1	80.796	8.09276	7		0.0485111	0.986623	-0.0269451	29.2038	29.1768	5	5	28.8872	28.9938	29.0709	29.5533	29.5136	29.0292	29.2058	29.1237	29.6821	28.8433
19	A2ASQ1	A2ASQ1	Agrin;Agrin N-terminal 110 kDa subunit;Agrin C-terminal 110 kDa subunit;Agrin C-terminal 90 kDa fragment;Agrin C-terminal 22 kDa fragment	Agrn	207.54	8.17545	17		0.217431	0.898985	-0.13189	30.6103	30.4784	5	5	30.6758	31.1535	30.0588	30.6978	30.4654	30.189	30.5508	30.281	30.26	31.1111
20	A2ASS6;REV__Q8BQ48	A2ASS6	Titin	Ttn	3906.4	8.60778	897		0.200449	0.876323	0.275069	36.0305	36.3056	5	5	37.1582	36.86	35.7996	35.1211	35.2138	37.3871	36.0113	35.1969	36.4543	36.4784
21	A2AUC9	A2AUC9	Kelch-like protein 41	Klhl41	68.189	8.46093	19		0.282856	0.800414	0.345512	29.6436	29.9891	5	5	30.6402	30.3746	28.1786	29.8478	29.1768	30.6021	29.5331	29.2517	30.0794	30.4792
25	A3KGB4	A3KGB4	TBC1 domain family member 8B	Tbc1d8b	127.89	7.32656	8		1.82477	0.189364	-0.678206	27.4441	26.9061	5	1	27.5316	26.824	28.1369	27.2628	27.4653	26.6312	26.8763	26.7499	26.666	26.9061
26	A3KGW5	A3KGW5	Probable inactive glycosyltransferase 25 family member 3	Cercam	67.671	8.03671	8		0.79393	0.584644	-0.343914	28.7193	28.3754	5	5	28.887	29.1895	28.5976	28.4569	28.4656	27.9326	28.4162	28.3257	28.2203	28.9823
27	A6H5Y3	A6H5Y3	Methionine synthase	Mtr	139.07	7.27418	10	+	4.18711	0.00380952	-1.52387	27.827	NaN	5	0	28.1912	27.6074	27.8823	28.0702	27.384	26.4522	26.256	26.335	25.8256	26.6469
29	B1AZI6	B1AZI6	THO complex subunit 2	Thoc2	182.77	7.09985	8		0.0475767	0.978425	0.0496162	26.9631	26.7195	3	4	26.4391	26.2516	26.6765	27.0593	27.1533	27.1414	26.351	25.7557	26.9499	27.6298
30	B2RQC6;Q8C196	B2RQC6	CAD protein;Glutamine-dependent carbamoyl-phosphate synthase;Aspartate carbamoyltransferase;Dihydroorotase	Cad	243.24	8.62	44		0.656395	0.723758	-0.231333	32.4596	32.2282	5	5	32.523	32.5513	32.559	32.0488	32.6157	32.6591	31.9761	31.8752	32.345	32.2857
35	B2RXS4	B2RXS4	Plexin-B2	Plxnb2	206.23	8.07044	14		0.275057	0.88229	0.143524	30.289	30.4325	5	5	30.2661	30.2103	29.8222	30.8385	30.308	30.2469	30.7984	30.776	30.2404	30.1009
36	B2RY56	B2RY56	RNA-binding protein 25	Rbm25	99.551	8.61096	20		0.138396	0.928138	0.0915901	30.5214	30.613	5	5	31.0042	30.9198	30.7114	30.213	29.7585	30.461	30.3781	30.9118	30.7194	30.5946
41	C0HK80;C0HK79	C0HK80;C0HK79			20.146	8.78394	4		0.885455	0.377154	-0.803139	29.656	28.8528	5	5	29.7734	30.2101	29.9117	28.9755	29.4091	29.5217	28.9329	29.1911	27.1988	29.4196
42	C0HKE9;C0HKE8;C0HKE7;C0HKE6;C0HKE5;C0HKE4;C0HKE3;C0HKE2;C0HKE1;Q8CGP6;Q8CGP7;Q8CGP5;Q8BFU2	C0HKE9;C0HKE8;C0HKE7;C0HKE6;C0HKE5;C0HKE4;C0HKE3;C0HKE2;C0HKE1;Q8CGP6;Q8CGP7;Q8CGP5;Q8BFU2	Histone H2A type 1-H;Histone H2A type 1-K;Histone H2A type 1-F;Histone H2A type 3	Hist1h2ah;Hist1h2ak;Hist1h2af;Hist3h2a	14.135	10.6597	10		0.710576	0.473964	0.689022	34.1442	34.8332	5	5	34.5282	34.8363	34.5782	32.3247	34.4536	34.7665	34.4165	34.9448	35.3795	34.6589
43	C0HKG6;C0HKG5	C0HKG6;C0HKG5			29.608	8.23885	5	+	3.47555	0.00607407	1.65681	NaN	28.2136	0	5	26.3581	26.5518	26.1735	26.7573	26.9432	28.0096	28.1231	28.206	29.0958	27.6335
81	D3YYU8	D3YYU8	Obscurin-like protein 1	Obsl1	197.93	8.56519	29		0.76161	0.652661	-0.281858	31.9469	31.665	5	5	32.0294	31.9511	31.7957	32.291	31.6672	31.7395	31.4418	31.3118	32.2143	31.6177
84	D3Z7P3	D3Z7P3	Glutaminase kidney isoform, mitochondrial	Gls	73.963	8.53381	18		0.70604	0.69995	-0.240209	30.7131	30.4729	5	5	30.6057	30.5465	30.6945	31.0721	30.6466	29.9721	30.5235	30.758	30.3809	30.7299
85	E9PV24	E9PV24	Fibrinogen alpha chain;Fibrinopeptide A;Fibrinogen alpha chain	Fga	87.428	9.28237	23		0.00989894	0.997165	-0.00766296	33.0801	33.0724	5	5	33.3528	32.9333	32.8053	32.9827	33.3264	33.6417	33.6421	32.7602	32.8225	32.4956
86	E9PVA8	E9PVA8		Gcn1l1	293.02	7.83408	38		0.303093	0.833183	-0.226187	30.4049	30.1787	5	5	30.4094	31.0878	30.4267	29.7874	30.3133	30.7603	29.8663	29.4951	30.0846	30.6875
88	E9PVD3	E9PVD3	Protocadherin-16	Dchs1	346.38	7.07232	6	+	2.94233	0.0173333	-1.42567	28.0583	NaN	5	0	28.8443	28.0827	27.5384	28.1536	27.6724	26.8525	26.3635	26.0735	26.8929	26.9808
89	E9PVX6	E9PVX6		Mki67	350.86	7.09681	7		0.365693	0.738527	-0.436803	27.8677	28.0803	5	3	28.41	28.5218	28.0593	26.7447	27.6029	27.7873	26.3211	28.4782	26.5926	27.9756
90	E9PYH6	E9PYH6	Histone-lysine N-methyltransferase	Setd1a	186.06	7.37348	3		0.233704	0.832548	0.403272	27.6944	27.5413	3	5	26.7461	25.8608	26.5177	27.8795	28.6861	26.7708	27.6927	27.7915	29.1613	26.2902
92	E9Q1P8	E9Q1P8	Interferon regulatory factor 2-binding protein 2	Irf2bp2	59.291	8.24788	7		0.980982	0.288304	1.03907	29.0876	29.8787	4	5	29.2059	27.8479	29.7858	29.0456	28.3131	29.7122	30.8098	31.0135	28.6819	29.1762
98	E9Q5C9	E9Q5C9		Nolc1	73.697	8.42095	11		0.282957	0.854493	-0.205919	29.9384	29.7325	5	5	29.7435	29.6378	29.2157	30.404	30.6914	29.4306	30.0123	29.4259	30.1546	29.6393
100	E9Q5K9	E9Q5K9	YTH domain-containing protein 1	Ythdc1	85.648	8.17014	7		0.200882	0.882066	-0.213714	28.7751	28.5614	5	5	29.1518	28.5103	28.4797	28.8951	28.8386	29.1298	27.8561	27.5579	29.7796	28.4835
104	E9Q7G0	E9Q7G0		Numa1	235.63	8.99922	75		0.485122	0.786611	0.204533	33.6485	33.853	5	5	33.643	34.0415	33.9081	33.2842	33.3655	34.1798	33.5937	33.5459	34.1084	33.8372
105	E9Q7T7	E9Q7T7	Chondroadherin-like protein	Chadl	81.36	9.39343	35		0.156911	0.902692	0.187047	33.2943	33.4814	5	5	33.2743	34.0283	33.9549	31.96	33.2541	33.6482	32.9584	32.8055	34.3424	33.6523
107	E9QAT4	E9QAT4		Sec16a	254.2	8.0766	20		0.778716	0.749472	-0.187199	30.495	30.3078	5	5	30.6429	30.4419	30.6702	30.662	30.058	30.2782	30.4285	30.3433	30.2026	30.2865
110	F6ZDS4	F6ZDS4	Nucleoprotein TPR	Tpr	273.99	8.80266	83		0.204005	0.904078	0.113657	33.1109	33.2246	5	5	33.2522	33.2362	33.3145	33.3271	32.4245	33.1511	33.6356	33.4671	32.8857	32.9834
111	F8VPU2	F8VPU2	FERM, RhoGEF and pleckstrin domain-containing protein 1	Farp1	118.87	8.46855	27		0.312414	0.833822	-0.217592	30.9025	30.6849	5	5	30.9468	31.5532	31.0307	30.0245	30.9573	30.8935	30.4971	30.2985	30.4979	31.2375
112	G5E829;Q9R0K7	G5E829	Plasma membrane calcium-transporting ATPase 1	Atp2b1	134.75	8.09625	13		0.062725	0.965769	-0.0794067	29.3627	29.2833	5	5	28.9503	30.1874	30.122	28.5164	29.0373	30.2987	29.1911	28.5555	28.8073	29.5638
114	G5E897	G5E897		Kdelc2	57.685	8.30451	6		0.282963	0.846358	0.222123	29.2105	29.4326	5	5	28.1977	29.1451	29.4691	29.1837	30.057	29.0141	29.7734	29.6339	29.2305	29.5114
115	O08528	O08528	Hexokinase-2	Hk2	102.53	8.56018	24		0.658506	0.779181	0.175141	31.0703	31.2454	5	5	30.9964	30.9484	31.5062	30.8006	31.0998	31.3636	31.2225	31.0422	31.3097	31.2891
116	O08529	O08529	Calpain-2 catalytic subunit	Capn2	79.871	8.99845	25		0.394842	0.761757	-0.310651	31.991	31.6803	5	5	32.4118	32.5371	31.8057	31.3906	31.8097	32.1909	31.5133	30.6992	31.7576	32.2406
118	O08539;D3Z6Q9;Q7TQF7	O08539	Myc box-dependent-interacting protein 1	Bin1	64.469	9.05477	15		1.80216	0.115333	0.970483	31.3756	32.3461	5	5	31.9101	31.8871	31.5828	31.208	30.29	32.3637	32.3582	32.5359	32.5232	31.9494
119	O08547	O08547	Vesicle-trafficking protein SEC22b	Sec22b	24.74	8.94912	9		0.178765	0.913334	-0.10358	30.3086	30.205	5	5	29.9134	30.3181	30.119	30.1769	31.0154	30.4813	29.99	29.9706	30.5599	30.0231
120	O08553	O08553	Dihydropyrimidinase-related protein 2	Dpysl2	62.277	9.57328	35		0.356705	0.875761	-0.127674	33.9262	33.7986	5	5	33.7085	33.7362	33.6636	34.2529	34.27	33.5262	33.8171	33.9332	33.9488	33.7675
123	O08583;Q9JJW6	O08583	THO complex subunit 4	Alyref	26.94	8.35807	5		1.34991	0.10797	2.08906	NaN	29.6208	0	4	27.6233	27.5551	26.5107	25.3891	27.2806	30.8687	30.0314	29.0079	26.321	28.575
124	O08585	O08585	Clathrin light chain A	Clta	25.604	8.32693	2	+	2.7297	0.00748387	2.48353	NaN	28.7537	0	4	25.9007	26.7199	25.7912	24.962	25.8834	28.3158	29.539	28.6787	28.4813	26.6602
125	O08599	O08599	Syntaxin-binding protein 1	Stxbp1	67.568	8.20107	8		0.274774	0.876675	0.165684	29.1678	29.3335	5	5	28.9199	29.5679	29.6009	29.0075	28.7429	29.4411	29.1979	28.6995	29.752	29.5771
127	O08638	O08638	Myosin-11	Myh11	227.03	7.25563	22		0.434368	0.65212	-0.57739	27.8105	27.7326	5	4	27.9217	27.7751	27.4229	27.6008	28.3322	28.8984	27.5035	27.2445	27.2837	25.2355
128	O08663	O08663	Methionine aminopeptidase 2	Metap2	52.921	9.02576	18		0.23493	0.90242	0.110979	31.6544	31.7653	5	5	31.6479	31.4309	31.6253	32.1031	31.4646	31.4345	32.1657	32.0958	31.5995	31.5311
129	O08677	O08677	Kininogen-1;Kininogen-1 heavy chain;Bradykinin;Kininogen-1 light chain	Kng1	73.101	8.77219	16		0.176521	0.904231	0.126729	31.1233	31.25	5	5	31.4473	31.4297	30.2425	31.3618	31.1351	30.9333	31.5256	31.7312	31.2087	30.8513
131	O08746	O08746	Matrilin-2	Matn2	106.75	8.70284	23		0.275903	0.921171	-0.0635647	31.5048	31.4413	5	5	31.6318	31.4684	31.3881	31.3489	31.687	31.3554	31.5948	31.2118	31.5544	31.49
132	O08749	O08749	Dihydrolipoyl dehydrogenase, mitochondrial	Dld	54.272	8.82178	13		1.70286	0.149421	0.864222	30.3643	31.2285	5	5	30.6962	29.7988	30.344	31.082	29.9005	31.3537	31.014	31.7308	31.3489	30.6953
133	O08756	O08756	3-hydroxyacyl-CoA dehydrogenase type-2	Hsd17b10	27.418	8.3493	3		1.10291	0.204952	1.44271	29.1954	29.1337	2	5	26.7509	26.5171	28.7728	26.7963	29.618	28.795	28.5488	29.0663	30.4582	28.8004
134	O08759	O08759	Ubiquitin-protein ligase E3A	Ube3a	99.818	8.109	13		0.700418	0.772891	-0.174715	29.4357	29.261	5	5	29.1312	29.5446	29.4198	29.5309	29.5521	29.2701	29.3757	29.1958	29.5191	28.9443
135	O08784	O08784	Treacle protein	Tcof1	135	7.4645	6	+	2.34636	0.0199344	-1.77457	28.3449	NaN	5	0	28.1211	27.9984	29.0613	28.3172	28.2267	26.8932	24.9571	26.8584	27.3334	26.8097
136	O08788	O08788	Dynactin subunit 1	Dctn1	141.67	8.85491	38		0.185659	0.95835	0.0403259	32.4467	32.487	5	5	32.4557	32.5559	32.5486	32.4449	32.2285	32.5731	32.6103	32.3882	32.573	32.2905
138	O08795	O08795	Glucosidase 2 subunit beta	Prkcsh	58.792	9.76969	30		0.546441	0.693006	-0.307286	33.8619	33.5546	5	5	33.9945	33.7733	33.7976	34.2146	33.5296	33.3203	33.7627	34.1972	32.7629	33.7301
140	O08807	O08807	Peroxiredoxin-4	Prdx4	31.052	9.56374	15		0.548607	0.659248	0.362574	32.6684	33.0309	5	5	31.9209	32.3254	33.0259	33.0874	32.9823	32.4263	32.7906	33.1382	33.714	33.0856
142	O08810	O08810	116 kDa U5 small nuclear ribonucleoprotein component	Eftud2	109.36	9.11062	38		1.19545	0.587178	-0.259302	33.1243	32.865	5	5	32.8223	33.3544	33.1058	33.1465	33.1925	32.7433	32.7188	32.7278	33.0219	33.1132
143	O08848	O08848	60 kDa SS-A/Ro ribonucleoprotein	Trove2	60.123	7.5519	8		0.187177	0.867229	0.391222	27.4519	26.5651	3	4	27.399	25.9244	27.0184	23.6166	27.9384	26.018	26.1746	26.6377	27.5926	27.43
145	O08912	O08912	Polypeptide N-acetylgalactosaminyltransferase 1;Polypeptide N-acetylgalactosaminyltransferase 1 soluble form	Galnt1	64.254	7.20455	3	+	2.20222	0.0434419	1.31748	25.3343	NaN	4	0	25.6104	24.9498	25.3955	25.9756	25.3813	26.1594	27.2552	26.018	27.6864	26.781
146	O08915	O08915	AH receptor-interacting protein	Aip	37.605	8.57241	7		1.30079	0.180544	1.1416	28.8859	30.0275	5	5	28.0577	28.7922	30.2158	28.4752	28.8884	29.7967	30.3208	30.1424	30.9641	28.9133
148	O08992	O08992	Syntenin-1	Sdcbp	32.379	8.63219	5		0.145212	0.926095	0.0893764	28.9096	28.9989	5	5	28.6377	28.2798	29.1087	29.3905	29.1311	29.2406	28.6681	29.2399	29.1406	28.7056
153	O09106	O09106	Histone deacetylase 1	Hdac1	55.074	9.42817	19		0.414369	0.875109	-0.120613	32.7849	32.6643	5	5	32.4577	32.6037	32.9425	32.8979	33.0226	32.4945	32.6697	32.6195	32.5984	32.9391
155	O09111	O09111	NADH dehydrogenase [ubiquinone] 1 beta subcomplex subunit 11, mitochondrial	Ndufb11	17.444	8.146	3		1.51931	0.174492	0.909861	NaN	27.0553	0	5	26.7475	26.6337	25.833	25.2241	26.289	27.5965	26.9838	26.7323	26.5262	27.4377
158	O09161	O09161	Calsequestrin-2	Casq2	48.176	9.59951	15		0.589511	0.589264	0.471354	32.4324	32.9037	5	5	33.2344	32.8323	31.9385	32.6771	31.4795	33.5045	32.6302	32.2501	33.2342	32.8996
159	O09165	O09165	Calsequestrin-1	Casq1	46.377	8.73683	4		0.0171435	0.992499	-0.0319107	29.3945	29.896	5	4	30.282	29.4258	28.9289	29.9146	28.4212	29.9293	30.2155	29.8667	29.5726	27.2286
160	O09167	O09167	60S ribosomal protein L21	Rpl21	18.562	10.0189	8		0.719669	0.513633	0.512904	32.4856	32.9985	5	5	32.4703	33.194	32.6181	31.5815	32.564	33.5265	32.4626	32.8713	33.6317	32.5005
163	O35074	O35074	Prostacyclin synthase	Ptgis	57.046	7.80494	8		0.307202	0.764851	-0.498335	27.5121	27.4707	5	4	28.4287	28.2083	27.4551	26.98	26.4885	28.8052	26.6153	26.9482	25.1858	27.5144
164	O35103	O35103	Osteomodulin	Omd	49.745	8.00445	3		0.58262	0.550003	0.647128	27.8812	27.8647	2	4	28.0116	27.7508	26.3018	26.4851	25.9321	26.2582	28.0479	28.1691	27.5995	27.6425
165	O35114	O35114	Lysosome membrane protein 2	Scarb2	54.043	7.68541	3		0.150515	0.90542	0.166681	26.9502	27.5164	4	2	26.6133	27.7139	26.8533	26.0049	26.6204	27.857	27.0264	25.8509	27.1759	26.7291
166	O35129	O35129	Prohibitin-2	Phb2	33.296	8.64774	16		0.733024	0.43312	0.87893	29.4698	30.3488	5	5	29.4339	30.2497	30.6998	27.6847	29.2811	30.8897	29.6041	29.7115	31.2109	30.3276
168	O35143	O35143	ATPase inhibitor, mitochondrial	Atpif1	12.159	8.28323	2		1.20853	0.164454	1.53532	27.027	28.3554	1	4	27.1466	27.3359	27.027	25.026	26.5111	28.0872	29.4546	29.3532	26.5266	27.3016
169	O35206	O35206	Collagen alpha-1(XV) chain;Restin	Col15a1	140.47	9.3066	23		2.02399	0.250978	-0.503043	33.6452	33.1422	5	5	33.8006	33.7943	33.4081	33.8241	33.399	33.2581	33.0497	32.9166	32.9682	33.5182
170	O35218	O35218	Cleavage and polyadenylation specificity factor subunit 2	Cpsf2	88.382	7.94632	10		0.891648	0.435413	-0.583277	29.0123	28.429	5	5	29.036	30.1411	28.9218	28.688	28.2743	27.9736	28.3789	28.5517	28.8798	28.3609
171	O35226	O35226	26S proteasome non-ATPase regulatory subunit 4	Psmd4	40.703	8.90582	9		0.980775	0.475046	0.447534	30.1766	30.6241	5	5	30.1358	30.5925	30.6648	29.7943	29.6955	30.0578	30.7999	30.7665	30.7798	30.7164
173	O35286	O35286	Pre-mRNA-splicing factor ATP-dependent RNA helicase DHX15	Dhx15	91.006	8.96813	34		0.397629	0.833881	-0.171988	32.1659	31.9939	5	5	32.2112	32.4448	32.328	31.6176	32.2281	32.1748	31.6122	32.0104	31.8184	32.3539
174	O35295	O35295	Transcriptional activator protein Pur-beta	Purb	33.901	9.33252	9		2.21918	0.127623	0.722318	30.8679	31.5902	5	5	30.7445	30.8376	31.2178	30.6615	30.8779	31.0765	31.7133	32.1288	31.4991	31.5332
176	O35326	O35326	Serine/arginine-rich splicing factor 5	Srsf5	30.891	9.24765	11		0.12682	0.918342	-0.141246	30.8576	30.7164	5	5	30.0828	30.2888	31.4526	31.4318	31.0322	30.0487	31.4948	31.4162	30.4883	30.1341
177	O35343	O35343	Importin subunit alpha-3	Kpna4	57.922	8.94929	10		0.0797195	0.978308	-0.0298038	30.7606	30.7308	5	5	30.4786	30.6783	30.9919	30.643	31.0113	30.5072	30.8804	30.7268	30.5707	30.9688
178	O35344	O35344	Importin subunit alpha-4	Kpna3	57.772	8.12493	10		0.44091	0.74385	0.29873	28.0039	28.3027	5	5	28.7507	27.3642	27.7133	28.1608	28.0306	28.2663	28.6769	28.8501	27.8969	27.823
179	O35345	O35345	Importin subunit alpha-7	Kpna6	59.964	7.9193	7	+	3.07648	0.0056	2.16807	NaN	28.7017	0	4	26.5842	26.2213	25.7668	26.3945	26.0281	29.3518	28.7959	28.0593	27.0282	28.6
180	O35350	O35350	Calpain-1 catalytic subunit	Capn1	82.105	7.15915	3		0.122256	0.915666	-0.163985	27.0274	NaN	4	0	27.5776	27.45	26.6216	26.4604	25.7001	27.2809	25.7552	27.4889	26.7452	25.7195
181	O35367	O35367	Keratocan	Kera	40.403	9.36564	16		1.60808	0.150154	0.935988	32.1493	33.0853	5	5	32.5639	32.1746	32.5088	31.9486	31.5506	32.3899	33.5683	33.4944	33.5764	32.3974
182	O35381;Q64G17	O35381	Acidic leucine-rich nuclear phosphoprotein 32 family member A	Anp32a	28.537	9.73746	9		0.763842	0.508335	0.481751	32.2408	32.7226	5	5	31.6039	31.9876	33.0288	32.6126	31.9712	32.9055	32.8916	32.591	33.1869	32.0378
183	O35386	O35386	Phytanoyl-CoA dioxygenase, peroxisomal	Phyh	38.607	8.45812	6		0.117167	0.925198	-0.122603	29.4184	29.2958	5	5	28.5254	29.0181	30.004	29.6418	29.9027	29.1522	29.0941	30.3501	29.1573	28.7252
187	O35465	O35465	Peptidyl-prolyl cis-trans isomerase FKBP8	Fkbp8	43.528	8.36637	8		0.54418	0.591549	0.520024	29.146	29.2474	4	5	28.9977	29.345	29.3446	27.053	28.8965	29.3286	29.166	29.1242	29.7717	28.8466
188	O35474	O35474	EGF-like repeat and discoidin I-like domain-containing protein 3	Edil3	53.711	9.46153	23		0.274201	0.899222	0.112301	33.1299	33.2422	5	5	32.9197	33.1987	33.4359	32.6121	33.4829	33.0555	33.2926	33.3757	33.257	33.2301
189	O35516	O35516	Neurogenic locus notch homolog protein 2;Notch 2 extracellular truncation;Notch 2 intracellular domain	Notch2	265.63	7.11935	4		2.09746	0.0812759	-1.00189	27.2922	NaN	5	0	27.214	26.6471	27.2723	27.7767	27.5509	26.255	26.0134	26.3526	25.7851	27.0455
190	O35566	O35566	CD151 antigen	Cd151	28.246	8.09008	3	+	2.08077	0.0291268	1.89755	NaN	28.2973	0	4	25.9808	26.693	25.4527	25.4453	27.3916	29.5766	27.6976	28.0531	27.2621	27.8617
191	O35593	O35593	26S proteasome non-ATPase regulatory subunit 14	Psmd14	34.577	9.11807	11		0.115427	0.95432	-0.0591297	31.3108	31.2517	5	5	31.4597	31.0238	31.4763	31.2119	31.3822	31.6884	30.8507	30.9646	31.6314	31.1233
196	O35638	O35638	Cohesin subunit SA-2	Stag2	141.28	7.87036	9		0.13621	0.919669	-0.119684	29.1369	29.0172	5	5	28.9843	29.7215	29.5558	28.5577	28.8652	29.8246	29.0371	29.197	28.2745	28.7529
197	O35640	O35640	Annexin A8	Anxa8	36.724	8.59883	10		0.0827493	0.960375	0.0612022	29.9679	30.0291	5	5	29.9161	29.7188	29.5515	30.2208	30.4322	30.2142	30.0384	29.3939	30.7012	29.7977
198	O35643	O35643	AP-1 complex subunit beta-1	Ap1b1	103.93	8.02576	24		0.0345397	0.991557	-0.0200848	29.2039	29.1838	5	5	29.1283	28.986	29.0652	28.9628	29.877	29.6063	29.1555	29.0021	29.0327	29.1222
199	O35646	O35646	Calpain-6	Capn6	74.542	9.03806	25		0.321036	0.868	-0.155267	32.0155	31.8602	5	5	32.1054	32.3877	32.1156	31.5837	31.8849	32.1661	31.3988	31.5791	31.9617	32.1954
200	O35654	O35654	DNA polymerase delta subunit 2	Pold2	51.354	8.17563	7		0.567936	0.585813	0.52385	28.389	28.9128	5	5	27.8999	28.3334	28.0632	28.6069	29.0415	27.9001	28.6529	29.6602	29.983	28.3679
201	O35658	O35658	Complement component 1 Q subcomponent-binding protein, mitochondrial	C1qbp	31.013	8.20474	3		0.612389	0.475031	0.973359	27.5272	28.5005	5	5	25.9324	26.5898	27.0282	29.1576	28.9278	27.2859	28.8383	29.7667	28.7686	27.8431
203	O35682	O35682	Myeloid-associated differentiation marker	Myadm	35.284	8.58739	3		0.0862678	0.934812	-0.199573	28.3214	28.7651	5	3	28.7247	30.0135	28.1899	27.4014	27.2777	28.9999	28.8916	25.4224	28.3328	28.9627
204	O35685	O35685	Nuclear migration protein nudC	Nudc	38.358	9.41731	22		0.743698	0.58658	0.363051	32.6444	33.0074	5	5	32.3942	32.5098	32.766	32.9862	32.5655	32.522	33.434	33.6095	32.933	32.5385
205	O35691	O35691	Pinin	Pnn	82.435	8.99275	21		0.0449545	0.98824	0.0252869	31.9426	31.9678	5	5	32.2678	31.8305	32.1497	31.9568	31.508	32.2393	31.8357	31.4518	32.2178	32.0947
206	O35701	O35701	Matrilin-3	Matn3	51.845	10.3234	33		0.193295	0.930264	-0.0676933	35.9821	35.9144	5	5	35.7611	35.6961	36.2085	35.9553	36.2897	35.7718	35.9063	35.9587	36.1733	35.7621
208	O35737	O35737	Heterogeneous nuclear ribonucleoprotein H;Heterogeneous nuclear ribonucleoprotein H, N-terminally processed	Hnrnph1	49.199	9.70915	22		0.282	0.876726	0.149709	33.4119	33.5616	5	5	33.1026	33.0934	33.5431	33.5546	33.7659	32.9275	33.7263	33.9565	33.763	33.4349
209	O35841	O35841	Apoptosis inhibitor 5	Api5	56.784	8.39665	10		0.0666034	0.971219	0.0404667	29.5802	29.6207	5	5	29.0667	29.6216	29.6275	29.552	30.0333	29.6027	29.4945	29.8571	30.0255	29.1236
211	O35857	O35857	Mitochondrial import inner membrane translocase subunit TIM44	Timm44	51.091	8.48629	12		0.698394	0.750414	-0.196574	30.1129	29.9163	5	5	30.4306	30.0991	30.0913	29.7911	30.1522	30.0943	29.66	29.9761	30.1363	29.7147
212	O35864	O35864	COP9 signalosome complex subunit 5	Cops5	37.548	8.59953	11		0.680466	0.492597	-0.617732	29.8506	29.2329	5	5	28.7913	29.2021	30.1647	30.3302	30.7647	28.6214	30.0615	29.1041	28.8052	29.5721
213	O35887	O35887	Calumenin	Calu	37.063	9.48773	20		0.381763	0.747205	0.364149	32.4125	32.7766	5	5	32.7257	32.7022	32.9798	32.3825	31.2721	33.2958	33.135	33.3441	31.9484	32.1598
214	O35900	O35900	U6 snRNA-associated Sm-like protein LSm2	Lsm2	10.834	8.51532	3	+	2.31048	0.0456264	-1.17542	28.1513	NaN	4	0	28.3161	28.0865	27.539	28.0859	28.1169	27.7035	25.988	27.0471	26.8123	26.7164
216	O35969	O35969	Guanidinoacetate N-methyltransferase	Gamt	26.336	8.72146	10		0.0749079	0.953747	-0.114154	29.4267	29.8017	5	4	30.3116	28.963	28.8805	29.5311	29.4473	29.8851	29.7097	29.7546	29.8573	27.3561
218	O54724	O54724	Polymerase I and transcript release factor	Ptrf	43.953	9.5885	17		1.05832	0.405122	0.5479	32.7286	33.2765	5	5	32.9609	33.2618	32.9835	31.9589	32.4779	33.4223	33.3727	33.6362	33.2795	32.6718
219	O54734	O54734	Dolichyl-diphosphooligosaccharide--protein glycosyltransferase 48 kDa subunit	Ddost	49.027	9.29108	16		0.141141	0.952822	-0.0531212	32.2712	32.2181	5	5	31.8885	32.1258	32.5196	32.2722	32.5498	32.3288	32.2462	32.1547	32.3928	31.9679
221	O54774	O54774	AP-3 complex subunit delta-1	Ap3d1	135.08	7.84167	11		0.355362	0.750884	-0.396706	29.0753	28.6786	5	5	29.1564	28.8701	28.7892	29.2461	29.3145	28.5868	28.9017	29.0158	29.9097	26.9788
226	O54941	O54941	SWI/SNF-related matrix-associated actin-dependent regulator of chromatin subfamily E member 1	Smarce1	46.638	8.70276	8		1.58441	0.127484	1.12372	29.6786	30.8023	5	5	29.1167	30.1535	30.6715	29.3592	29.0922	30.2374	31.1295	30.508	31.6901	30.4468
227	O54946;Q9QYI8	O54946	DnaJ homolog subfamily B member 6	Dnajb6	39.807	8.57587	4		0.225802	0.863671	-0.269068	29.324	29.3992	5	4	29.6964	29.9519	29.6838	29.12	28.1677	29.7309	29.3166	29.5516	28.9978	27.6775
229	O54962	O54962	Barrier-to-autointegration factor;Barrier-to-autointegration factor, N-terminally processed	Banf1	10.102	9.29345	6		0.448759	0.634338	0.642309	30.0187	30.661	5	5	30.3339	29.8323	31.2496	28.8792	29.7982	30.2662	31.9129	31.8031	30.1955	29.1272
230	O54984	O54984	ATPase Asna1	Asna1	38.822	8.64769	8		0.498733	0.619667	-0.541367	29.7708	29.2295	5	5	30.0967	30.0532	29.5768	30.1131	29.0144	29.2139	30.1783	29.5534	27.4962	29.7056
231	O54988	O54988	STE20-like serine/threonine-protein kinase	Slk	141.46	7.70666	10		0.20057	0.88092	-0.22279	28.556	28.7129	5	4	28.6256	28.8199	28.875	28.3917	28.0679	28.85	28.1794	26.8147	29.2685	28.5535
232	O54998	O54998	Peptidyl-prolyl cis-trans isomerase FKBP7	Fkbp7	24.913	9.16616	15		0.965725	0.432151	0.542406	31.1066	31.649	5	5	30.6972	31.3096	31.8266	30.9172	30.7823	31.1931	31.9754	32.325	31.3022	31.4492
233	O55022	O55022	Membrane-associated progesterone receptor component 1	Pgrmc1	21.694	9.47738	9		0.751673	0.56067	0.412192	31.2711	31.6833	5	5	31.3902	31.8847	31.5764	31.0056	30.4987	31.7595	31.8222	31.3623	32.1014	31.3712
234	O55023	O55023	Inositol monophosphatase 1	Impa1	30.436	9.30207	15		0.0461877	0.981215	0.043404	31.9801	32.0235	5	5	31.465	31.4582	31.7392	32.7163	32.5216	31.4368	32.2738	32.2111	32.4952	31.7004
236	O55029	O55029	Coatomer subunit beta	Copb2	102.45	9.44812	42		1.23935	0.55229	-0.289902	34.1378	33.8479	5	5	33.8125	34.146	34.1435	34.1202	34.4667	33.8934	33.7428	33.5959	34.043	33.9642
240	O55106	O55106	Striatin	Strn	85.965	7.75877	7		0.0350815	0.990144	-0.0139278	28.2502	28.2363	5	5	28.0656	28.0551	28.2543	28.5515	28.3247	28.0953	28.5081	28.2781	28.3792	27.9209
242	O55125	O55125	Protein NipSnap homolog 1	Nipsnap1	33.363	8.36342	8		0.0381075	0.981192	0.0698803	28.4654	28.5353	5	5	28.9941	27.8825	26.3043	29.6641	29.4821	29.1212	28.5068	28.2001	28.4316	28.4167
243	O55126	O55126	Protein NipSnap homolog 2	Gbas	32.932	9.18387	12		0.842623	0.582587	0.333405	31.4635	31.7969	5	5	31.6587	31.1576	31.7918	31.4082	31.3014	32.0193	32.2593	31.8211	31.6186	31.2663
244	O55128	O55128	Histone deacetylase complex subunit SAP18	Sap18	17.595	8.93862	11		1.09893	0.263479	0.967517	29.7375	30.705	5	5	29.1981	29.2244	30.4221	30.0702	29.7726	29.8715	31.3297	31.8021	30.9047	29.617
245	O55131	O55131	Septin-7	39326	50.549	9.8524	30		0.247004	0.91131	0.0826706	34.2266	34.3093	5	5	34.0648	34.3629	34.3905	34.0032	34.3116	34.0294	34.217	34.1507	34.5894	34.5598
246	O55135	O55135	Eukaryotic translation initiation factor 6	Eif6	26.511	8.928	10		1.27806	0.412154	-0.447065	30.0452	29.5982	5	5	30.0528	29.792	29.6501	30.6519	30.0794	29.4368	29.5582	29.5241	29.9743	29.4975
247	O55137	O55137	Acyl-coenzyme A thioesterase 1	Acot1	46.135	8.86897	14		0.647471	0.668144	-0.29634	31.1337	30.8374	5	5	30.6204	30.9451	31.3137	31.3613	31.4281	30.2745	30.7178	31.2503	30.9052	31.039
248	O55142	O55142	60S ribosomal protein L35a	Rpl35a	12.554	10.1075	12		0.0312215	0.986649	-0.0545437	33.0074	32.9529	5	5	33.8564	34.1935	32.7758	31.7482	32.4632	33.5446	31.9873	32.1115	33.021	34.1001
249	O55143	O55143	Sarcoplasmic/endoplasmic reticulum calcium ATPase 2	Atp2a2	114.86	8.53104	21		0.183324	0.896629	-0.16916	30.83	30.6608	5	5	30.5941	31.0289	30.8284	30.4	31.2984	31.4476	29.8649	29.8872	30.9744	31.13
251	O55201	O55201	Transcription elongation factor SPT5	Supt5h	120.66	8.55089	18		0.351957	0.889288	-0.107868	31.2779	31.1701	5	5	31.1329	31.1484	31.1353	31.6352	31.3379	30.8547	31.1755	31.2497	31.4237	31.1467
252	O55222	O55222	Integrin-linked protein kinase	Ilk	51.373	9.32077	23		1.45578	0.472172	0.33876	32.4225	32.7613	5	5	32.7419	32.5945	32.3398	31.998	32.4383	32.8427	32.7116	32.8419	32.796	32.6143
253	O55226	O55226	Chondroadherin	Chad	40.348	9.48947	21		0.418371	0.716534	0.388178	32.301	32.6892	5	5	32.5771	32.1745	33.2259	31.123	32.4046	33.094	32.4272	32.4805	33.3898	32.0545
254	O70133	O70133	ATP-dependent RNA helicase A	Dhx9	149.47	9.16859	42		0.530869	0.672691	-0.355317	33.471	33.1157	5	5	33.8666	34.0063	33.3817	32.8164	33.2839	33.6306	32.8295	32.6352	32.7502	33.7329
255	O70152	O70152	Dolichol-phosphate mannosyltransferase subunit 1	Dpm1	29.174	7.8651	4		2.02329	0.0732727	-1.11723	27.144	NaN	5	0	26.928	26.4308	28.2341	26.9349	27.1921	25.7924	26.2664	25.6277	26.3493	26.0978
256	O70194	O70194	Eukaryotic translation initiation factor 3 subunit D	Eif3d	63.988	9.00299	19		0.304846	0.841114	0.208189	31.4899	31.6981	5	5	31.7149	31.6002	31.7186	30.499	31.9168	31.5243	31.4042	31.9799	32.114	31.4681
257	O70209	O70209	PDZ and LIM domain protein 3	Pdlim3	34.299	8.28966	7		0.170652	0.882831	0.290953	28.2111	28.502	5	5	29.68	29.0832	27.698	28.2559	26.3382	29.72	28.4509	27.6538	28.3539	28.3317
259	O70250	O70250	Phosphoglycerate mutase 2	Pgam2	28.827	9.22902	17		0.803541	0.431313	0.694475	30.9913	31.6858	5	5	31.9249	31.4257	31.1628	30.2527	30.1903	32.3992	31.0949	31.0708	32.3352	31.5286
260	O70251	O70251	Elongation factor 1-beta	Eef1b	24.693	9.3371	13		1.07221	0.273858	0.91702	31.1654	32.0824	5	5	31.0624	31.1697	31.6318	31.0913	30.8717	31.4824	32.4516	32.6255	33.1882	30.6642
261	O70252	O70252	Heme oxygenase 2	Hmox2	35.738	8.74076	6		0.601536	0.578901	0.506445	29.901	30.4074	5	5	30.227	30.3853	30.7904	29.4205	28.6818	30.7726	30.1986	29.9841	30.7626	30.3193
262	O70258	O70258	Epsilon-sarcoglycan	Sgce	49.735	7.94141	2		0.000438494	0.999522	-0.000999069	28.367	28.0884	4	2	28.1885	28.6246	28.4227	28.2322	24.8059	27.7144	27.0158	27.1088	28.4624	27.9676
265	O70305	O70305	Ataxin-2	Atxn2	136.48	8.0159	6		0.219793	0.897427	0.135465	29.1759	29.3114	5	5	29.1656	28.7559	29.7903	29.106	29.0618	29.894	29.4021	29.3125	29.2023	28.746
267	O70309	O70309	Integrin beta-5	Itgb5	87.908	7.86874	9		0.171648	0.901508	-0.152677	28.671	28.7904	5	4	28.4363	28.456	28.2489	28.866	29.348	28.7822	28.5575	27.4302	29.1343	28.6875
268	O70310;O70311	O70310	Glycylpeptide N-tetradecanoyltransferase 1	Nmt1	56.888	8.22417	7		0.479121	0.772251	-0.226081	28.7746	28.5485	5	5	28.7415	29.4211	28.802	28.4534	28.4547	28.322	28.3148	28.7566	28.3993	28.9498
269	O70318	O70318	Band 4.1-like protein 2	Epb41l2	109.94	8.8659	36		0.121421	0.96	0.0442139	32.3825	32.4267	5	5	32.1115	32.4839	32.1691	32.5664	32.5815	32.2076	32.4675	32.2096	32.6047	32.644
270	O70325	O70325	Phospholipid hydroperoxide glutathione peroxidase, mitochondrial	Gpx4	22.228	9.1749	8		0.684758	0.534157	0.515036	30.8853	31.4003	5	5	30.0984	30.1183	30.9958	31.8121	31.4018	31.1872	31.6263	31.8264	31.3923	30.9693
273	O70378	O70378	ER membrane protein complex subunit 8	Emc8	23.348	8.26214	4		0.123807	0.91547	0.158096	28.1275	27.9002	4	5	28.3947	28.0009	28.1518	27.9627	26.2003	27.529	28.0374	28.9436	27.4196	27.5714
274	O70400	O70400	PDZ and LIM domain protein 1	Pdlim1	35.774	8.69187	9		0.803773	0.388328	0.928841	29.97	30.3836	4	5	30.2385	29.6291	29.5694	30.4431	27.3938	30.374	30.586	31.1252	30.2084	29.6245
275	O70401	O70401	Tetraspanin-6	Tspan6	27.333	8.24396	3		0.00715318	0.995853	0.00717354	28.0556	28.1834	5	4	28.3587	28.504	28.418	27.3629	27.6344	28.3094	28.0589	27.5107	27.5805	28.8545
276	O70433	O70433	Four and a half LIM domains protein 2	Fhl2	32.072	8.44971	8		0.179775	0.91786	0.0841801	29.2759	29.3601	5	5	29.6638	28.8596	29.3519	29.4787	29.0255	29.244	29.5619	29.6686	29.0548	29.2712
277	O70435	O70435	Proteasome subunit alpha type-3	Psma3	28.405	9.03411	11		0.140868	0.950867	-0.0562477	30.8611	30.8048	5	5	30.5352	30.818	30.9287	31.2369	30.7867	30.9589	30.7852	30.921	30.945	30.4142
279	O70475	O70475	UDP-glucose 6-dehydrogenase	Ugdh	54.831	10.1506	58		0.0113173	0.997192	0.00580826	35.6562	35.662	5	5	35.5166	35.322	35.736	35.9283	35.778	35.4643	35.7035	35.9242	35.9752	35.2429
281	O70492	O70492	Sorting nexin-3	Snx3	18.757	9.01081	9		1.45242	0.143977	1.16747	29.5967	30.7642	5	5	29.062	30.0633	30.5079	28.8561	29.4942	30.5863	30.8907	30.8681	31.8121	29.6637
283	O70503	O70503	Very-long-chain 3-oxoacyl-CoA reductase	Hsd17b12	34.741	8.39108	4		0.0235746	0.99003	0.0248871	28.8101	28.835	5	5	28.358	29.324	28.7656	27.9058	29.6972	29.2821	28.7265	28.6929	29.1386	28.3348
284	O70551	O70551	SRSF protein kinase 1	Srpk1	73.088	8.2149	8		0.324993	0.860511	0.168321	29.1498	29.3181	5	5	29.0574	28.8117	29.1115	29.2628	29.5057	28.9939	29.1026	29.1603	30.0647	29.2691
286	O70589	O70589	Peripheral plasma membrane protein CASK	Cask	105.11	8.1003	15		0.123128	0.939916	-0.0794712	29.5798	29.5004	5	5	29.258	30.167	29.6913	29.1327	29.6503	29.8834	29.5738	29.5986	29.5477	28.8984
287	O88200	O88200	C-type lectin domain family 11 member A	Clec11a	36.451	9.09117	10		0.455611	0.784937	0.21326	31.2163	31.4296	5	5	31	30.8708	31.4944	31.7182	30.9981	31.4194	31.5241	31.7155	31.5776	30.9113
288	O88207	O88207	Collagen alpha-1(V) chain	Col5a1	183.67	8.20984	26		1.32397	0.273189	0.688056	30.2631	30.9511	5	5	30.5911	29.7337	29.5662	30.6042	30.8202	30.7795	30.8976	31.5232	30.8458	30.7095
289	O88286	O88286	Protein Wiz	Wiz	184.29	7.31614	6	+	2.34101	0.0266269	1.5422	NaN	28.1108	0	4	26.5494	27.03	27.6147	25.9992	25.6654	28.649	28.0323	28.2566	28.1265	27.5054
290	O88291	O88291	DBIRD complex subunit ZNF326	Znf326	65.225	8.42664	5		0.580968	0.657182	-0.346948	30.0488	29.7018	5	5	30.4664	30.1084	30.364	29.1864	30.1188	29.4807	29.752	30.2645	29.8109	29.2011
291	O88322	O88322	Nidogen-2	Nid2	153.91	9.99617	76		0.844011	0.702606	-0.212511	36.2249	36.0124	5	5	36.2034	36.1387	36.047	36.6251	36.1103	35.8422	36.1329	36.2675	35.8979	35.9215
292	O88342	O88342	WD repeat-containing protein 1	Wdr1	66.406	8.61975	13		0.0670721	0.971603	-0.0488365	30.6012	30.5524	5	5	31.0084	29.9586	30.4251	30.6184	30.9954	30.833	30.8627	30.8084	30.2015	30.0562
294	O88428	O88428	Bifunctional 3-phosphoadenosine 5-phosphosulfate synthase 2;Sulfate adenylyltransferase;Adenylyl-sulfate kinase	Papss2	70.35	10.1814	54		1.12396	0.723835	-0.176738	36.0542	35.8774	5	5	35.9703	35.9047	36.2076	35.9651	36.2231	35.7366	35.8662	36.0673	35.8175	35.8995
296	O88447;O88448;Q9DBS5	O88447	Kinesin light chain 1	Klc1	61.449	8.13878	20		0.796125	0.416665	0.796656	28.9191	29.7157	5	5	28.1709	27.9935	29.4278	29.535	29.4682	30.0381	30.3544	30.3845	29.4686	28.333
297	O88456;Q9D7J7	O88456	Calpain small subunit 1	Capns1	28.463	8.74125	5		0.356752	0.672504	0.887943	29.9508	29.5237	3	4	30.2601	29.5562	30.036	25.569	26.1198	29.8401	27.8862	29.4434	28.7207	30.0904
298	O88487;O88485	O88487	Cytoplasmic dynein 1 intermediate chain 2	Dync1i2	68.393	8.95649	14		1.17378	0.411389	-0.479761	31.2974	30.8177	5	5	31.6335	31.6819	30.7235	31.4007	31.0478	30.7491	30.786	31.1014	30.3655	31.0865
299	O88508;O88509;P0DOY1	O88508	DNA (cytosine-5)-methyltransferase 3A	Dnmt3a	101.67	8.4099	21		0.199015	0.901592	-0.128593	30.6477	30.5191	5	5	30.7096	30.971	31.0742	29.8935	30.5903	30.5867	30.2941	30.234	30.3937	31.0873
301	O88531	O88531	Palmitoyl-protein thioesterase 1	Ppt1	34.49	8.13675	4		0.327414	0.792858	0.297079	28.2932	28.2273	4	5	26.4787	28.1975	28.0923	28.6569	28.226	27.8879	28.5586	28.3728	28.1839	28.1336
302	O88532	O88532	Zinc finger RNA-binding protein	Zfr	116.86	8.25144	10		0.677471	0.551642	0.488017	29.643	30.131	5	5	29.5642	29.8331	29.9568	28.7439	30.1169	29.3853	30.0423	29.8084	30.8744	30.5448
303	O88543	O88543	COP9 signalosome complex subunit 3	Cops3	47.832	8.47022	11		0.255468	0.878636	-0.160598	29.7986	29.638	5	5	28.9012	29.7905	29.9119	30.1802	30.209	29.4501	29.9898	29.3838	29.6557	29.7104
304	O88544	O88544	COP9 signalosome complex subunit 4	Cops4	46.284	8.43017	9		0.00621431	0.994667	-0.00479279	29.8296	29.8249	5	5	29.3622	29.6894	29.8987	30.0316	30.1664	29.3009	30.4768	29.7922	30.137	29.4173
305	O88545	O88545	COP9 signalosome complex subunit 6	Cops6	35.88	8.86394	8		0.134184	0.934398	0.0840328	30.0023	30.0863	5	5	29.504	29.5808	30.1002	30.2563	30.57	29.8385	29.9521	30.051	30.5708	30.019
306	O88569	O88569	Heterogeneous nuclear ribonucleoproteins A2/B1	Hnrnpa2b1	37.402	10.1741	30		0.824075	0.672049	0.242735	34.9171	35.1598	5	5	34.6624	34.9268	35.1482	35.0893	34.7588	34.8473	34.926	35.1901	35.3669	35.4687
307	O88587	O88587	Catechol O-methyltransferase	Comt	29.486	7.30865	5		0.93293	0.43114	-0.560365	26.146	25.621	2	4	26.1751	26.1169	27.3796	25.5566	26.1638	25.6328	25.7086	25.4192	26.1061	25.7233
308	O88653	O88653	Ragulator complex protein LAMTOR3	Lamtor3	13.553	9.86209	4		0.23529	0.848917	-0.298844	32.7986	32.4998	5	5	31.9653	32.7685	32.6281	33.5414	33.0895	31.1352	33.2332	33.7083	32.0841	32.338
309	O88685	O88685	26S protease regulatory subunit 6A	Psmc3	49.548	9.39724	31		0.782001	0.584337	0.35686	32.9021	33.2589	5	5	32.7163	32.8382	33.0467	33.4489	32.4602	32.8175	33.4297	33.7506	33.3032	32.9937
310	O88696	O88696	ATP-dependent Clp protease proteolytic subunit, mitochondrial	Clpp	29.8	8.24047	4	+	5.01448	0	2.35247	NaN	28.8591	0	5	27.2859	26.2721	26.4257	26.1576	26.3916	29.1913	28.8658	28.7548	29.0528	28.4306
311	O88712	O88712	C-terminal-binding protein 1	Ctbp1	47.744	9.08746	16		0.966409	0.530581	0.35912	31.5338	31.8929	5	5	31.3791	31.056	31.6172	31.8339	31.7829	32.0061	31.9822	31.9139	32.1878	31.3746
314	O88803	O88803	Leukocyte cell-derived chemotaxin-2	Lect2	16.405	8.60867	3		0.68104	0.435478	0.994672	28.995	28.3928	2	5	26.2518	27.0943	29.3008	25.6544	28.6891	28.4027	28.2387	28.1234	29.1714	28.0276
315	O88844	O88844	Isocitrate dehydrogenase [NADP] cytoplasmic	Idh1	46.674	9.61045	37		0.0391254	0.988588	0.0233223	33.6841	33.7075	5	5	33.3511	33.2369	33.8373	34.1485	33.8468	33.315	33.8157	34.0645	33.6845	33.6576
316	O88851	O88851	Putative hydrolase RBBP9	Rbbp9	20.911	9.24341	11		0.619215	0.582375	0.473792	30.913	31.3868	5	5	30.0937	30.3412	31.4755	31.4123	31.2422	30.6517	31.4883	31.8054	31.9239	31.0645
318	O88942;Q8K120;P97305	O88942;Q8K120;P97305	Nuclear factor of activated T-cells, cytoplasmic 1;Nuclear factor of activated T-cells, cytoplasmic 4;Nuclear factor of activated T-cells, cytoplasmic 3	Nfatc1;Nfatc4;Nfatc3	77.832	8.13865	10		0.339493	0.838178	-0.191158	29.1763	28.9852	5	5	29.5905	28.9922	29.6101	29.2101	28.4786	28.7975	28.8536	28.8005	29.466	29.0081
320	O88952;Q8JZS0;O88951	O88952;Q8JZS0	Protein lin-7 homolog C;Protein lin-7 homolog A	Lin7c;Lin7a	21.834	8.29778	5	+	2.73849	0.00717241	2.54166	NaN	29.4309	0	4	27.3687	25.7355	26.9629	25.8904	26.3185	29.0919	29.2545	29.9985	29.3787	27.2607
321	O89017	O89017	Legumain	Lgmn	49.372	8.69671	5		1.59676	0.090918	1.5223	29.0026	29.4297	2	5	26.929	27.4429	27.16	29.5699	28.4353	29.5134	29.8722	30.0275	29.1765	28.5588
322	O89023	O89023	Tripeptidyl-peptidase 1	Tpp1	61.341	8.74429	5		0.097624	0.959137	0.0591888	30.5617	30.6209	5	5	30.7466	29.995	30.4992	30.6469	30.921	30.7008	30.1263	30.5518	30.599	31.1267
323	O89029	O89029	Matrilin-4	Matn4	68.918	10.1555	46		0.330437	0.863535	-0.157831	35.9287	35.7709	5	5	35.4554	35.6543	35.8433	36.5262	36.1643	35.5297	35.7144	35.8551	36.0277	35.7274
324	O89053	O89053	Coronin-1A	Coro1a	50.989	8.80901	11		1.94638	0.328173	0.422386	30.4091	30.8315	5	5	30.0226	30.7263	30.4208	30.4123	30.4637	31.0255	30.8028	30.7656	30.909	30.6547
325	O89079	O89079	Coatomer subunit epsilon	Cope	34.567	9.38025	16		1.17189	0.740841	0.165801	32.0783	32.2441	5	5	32.0106	32.0748	32.3217	31.9051	32.0794	32.2252	32.2795	32.3496	32.2498	32.1165
326	O89086	O89086	RNA-binding protein 3	Rbm3	16.604	8.0566	2		0.0753136	0.969882	-0.0445423	26.744	26.6995	5	5	26.9355	26.8317	27.0158	26.3348	26.6022	27.226	26.7371	26.1614	26.8397	26.5331
327	O89090;Q9ESX2;Q64HY3;Q8BMJ8;Q9D2H6	O89090	Transcription factor Sp1	Sp1	80.731	8.76698	3		0.16473	0.895545	0.238026	29.2027	29.4408	5	5	30.3414	30.2127	29.6124	27.5583	28.2889	29.8821	29.1058	29.2781	29.3888	29.5489
328	O89110	O89110	Caspase-8;Caspase-8 subunit p18;Caspase-8 subunit p10	Casp8	55.356	7.90795	5		0.753367	0.442477	-0.745102	28.1452	28.3964	5	2	27.9962	28.0255	28.0971	28.3104	28.2965	26.167	26.4905	27.8455	27.55	28.9472
330	P00375	P00375	Dihydrofolate reductase	Dhfr	21.606	8.88955	12		0.0176975	0.993481	-0.0203167	30.2737	30.2533	5	5	30.2387	30.0634	29.8654	30.6529	30.5479	29.6157	30.2275	30.701	29.3534	31.3692
331	P00405	P00405	Cytochrome c oxidase subunit 2	Mtco2	25.976	8.22376	3		0.145105	0.909914	0.152673	27.0139	27.1852	5	4	27.4473	27.8558	25.8926	26.7877	27.0859	27.0395	26.4521	27.0919	27.8673	27.3819
332	P00493	P00493	Hypoxanthine-guanine phosphoribosyltransferase	Hprt1	24.57	8.86455	11	+	5.01889	0	-3.88152	31.0295	NaN	5	0	30.4968	30.6135	31.4357	31.5098	31.0916	27.0244	26.5897	26.2916	27.9958	27.8383
333	P01027;CON__Q2UVX4	P01027	Complement C3;Complement C3 beta chain;C3-beta-c;Complement C3 alpha chain;C3a anaphylatoxin;Acylation stimulating protein;Complement C3b alpha chain;Complement C3c alpha chain fragment 1;Complement C3dg fragment;Complement C3g fragment;Complement C3d fragment;Complement C3f fragment;Complement C3c alpha chain fragment 2	C3	186.48	7.63644	12		0.507606	0.737046	-0.272492	29.2359	28.9635	5	5	29.4304	29.4192	28.791	28.9048	29.6343	29.1677	28.5887	28.8876	29.5927	28.5806
334	P01831	P01831	Thy-1 membrane glycoprotein	Thy1	18.08	8.69414	4		1.59329	0.0718131	-1.88719	28.744	29.1483	5	1	29.6118	28.9186	28.517	28.4631	28.2092	26.3242	25.645	25.8263	27.3399	29.1483
335	P01837	P01837	Ig kappa chain C region		11.934	9.24706	4		0.152572	0.90423	0.204873	29.6332	29.8381	5	5	29.901	29.402	30.1604	30.1385	28.5643	30.2389	29.7601	31.1285	28.5471	29.5159
337	P01867	P01867	Ig gamma-2B chain C region	Igh-3	44.259	8.31559	4		1.36531	0.128388	1.48858	28.2831	28.8981	2	5	27.3655	27.5246	26.9121	26.0448	29.2006	28.0242	29.5719	29.6913	29.0094	28.1937
338	P01887	P01887	Beta-2-microglobulin	B2m	13.779	8.7132	2		0.968594	0.354351	0.767818	28.2964	29.0642	5	5	28.2506	29.2619	28.6356	27.7316	27.6022	28.8215	28.8853	30.1772	29.0106	28.4263
339	P01942	P01942	Hemoglobin subunit alpha	Hba	15.085	10.5382	8		0.829173	0.482007	0.482669	34.7509	35.2336	5	5	34.6021	35.0971	35.0721	33.9179	35.0654	35.1071	35.754	35.4041	35.3426	34.5601
340	P02088;P02089;CON__Q3SX09;CON__P02070	P02088;P02089	Hemoglobin subunit beta-1;Hemoglobin subunit beta-2	Hbb-b1;Hbb-b2	15.84	10.4085	12		0.0136696	0.994009	-0.0103516	35.1288	35.1185	5	5	34.8116	34.8294	35.3166	35.023	35.6636	34.9178	35.639	35.5318	34.9264	34.5775
342	P84244;P02301	P84244;P02301	Histone H3.3;Histone H3.3C	H3f3a;H3f3c	15.328	9.53315	14		0.571181	0.485941	0.989557	30.5374	30.7703	4	5	29.914	31.268	30.5009	26.7542	30.4666	30.6516	31.0765	31.5489	30.6663	29.9083
343	P02463	P02463	Collagen alpha-1(IV) chain;Arresten	Col4a1	160.68	8.57705	7		0.0280567	0.98719	0.0500767	31.4459	31.496	5	5	32.0803	32.1418	31.2087	31.8871	29.9116	32.4201	32.0813	30.5088	30.274	32.1958
344	P02468	P02468	Laminin subunit gamma-1	Lamc1	177.3	9.29403	61		0.109789	0.95896	0.0518036	34.2791	34.3309	5	5	34.2466	34.0674	34.0407	34.7254	34.3153	34.0537	34.5909	34.6786	34.1665	34.1647
345	P02469;Q8K182	P02469	Laminin subunit beta-1	Lamb1	197.09	8.81533	41		1.60636	0.431897	0.361564	32.4076	32.7692	5	5	32.5289	32.2642	32.1219	32.7522	32.3709	32.5505	32.8065	33.0049	32.7265	32.7575
346	P02772	P02772	Alpha-fetoprotein	Afp	67.337	9.23656	35		0.284218	0.838713	0.235203	32.8558	33.091	5	5	32.0451	32.5801	32.4526	33.6647	33.5366	32.5268	33.1566	33.2954	33.3366	33.1397
348	P04117;P24526;O08716	P04117	Fatty acid-binding protein, adipocyte	Fabp4	14.65	9.77528	10		1.41639	0.211853	0.809714	32.0156	32.8253	5	5	31.5603	31.4683	31.8936	32.6115	32.5444	32.5689	33.2517	33.4242	32.6413	32.2406
350	P04186	P04186	Complement factor B;Complement factor B Ba fragment;Complement factor B Bb fragment	Cfb	85.004	8.38416	14		0.0440925	0.987718	0.0221565	30.0854	30.1076	5	5	30.0541	30.3272	29.9948	29.656	30.3949	29.9665	29.7265	30.1647	30.3719	30.3082
352	P05064	P05064	Fructose-bisphosphate aldolase A	Aldoa	39.355	10.2022	31		1.78424	0.209656	0.628251	35.1235	35.7518	5	5	34.6234	35.1126	35.3381	35.1997	35.3438	35.2688	35.6549	35.8831	36.2514	35.7007
353	P05132	P05132	cAMP-dependent protein kinase catalytic subunit alpha	Prkaca	40.57	8.98106	12		0.0370568	0.985698	0.0429756	30.8926	30.9356	5	5	31.2876	31.2414	31.2776	29.941	30.7155	31.7969	30.569	30.4368	30.3048	31.5706
354	P05202	P05202	Aspartate aminotransferase, mitochondrial	Got2	47.411	7.93779	5	+	3.73563	0.00141176	2.43717	NaN	29.0265	0	5	27.7215	25.9676	26.5343	26.2271	26.4964	29.3197	29.6174	29.1212	28.7084	28.3659
355	P05213	P05213	Tubulin alpha-1B chain	Tuba1b	50.151	10.6903	46		0.174937	0.905533	0.132097	36.725	36.8571	5	5	36.1464	36.1971	36.667	37.3841	37.2304	36.4519	37.0606	37.3154	36.8024	36.655
357	P05622	P05622	Platelet-derived growth factor receptor beta	Pdgfrb	122.79	8.74125	2	+	2.18133	0.0106341	4.36464	NaN	31.6742	0	4	26.5835	25.6124	26.6891	25.7114	26.0616	25.7843	31.5287	31.6766	31.769	31.7227
358	P05977	P05977	Myosin light chain 1/3, skeletal muscle isoform	Myl1	20.594	9.99887	23		1.01025	0.27491	1.02527	33.0049	34.0301	5	5	33.7356	33.75	33.5038	32.3209	31.714	34.773	34.5391	34.3184	33.7226	32.7974
359	P06151;P00342	P06151	L-lactate dehydrogenase A chain	Ldha	36.498	9.68334	25		0.0691499	0.970464	-0.0466072	33.4304	33.3838	5	5	33.0599	33.2256	33.6206	33.1213	34.1248	33.0634	33.2697	33.2249	33.8715	33.4896
360	P06728	P06728	Apolipoprotein A-IV	Apoa4	45.029	8.5509	11		0.0778734	0.963355	0.0591648	30.0043	30.0635	5	5	29.94	30.4134	30.4249	29.523	29.7203	30.216	29.8729	30.5116	30.3695	29.3473
362	P06797	P06797	Cathepsin L1;Cathepsin L1 heavy chain;Cathepsin L1 light chain	Ctsl	37.547	8.38723	2		1.04818	0.222734	1.35526	28.223	28.962	4	5	27.4824	25.1415	28.7539	28.4193	28.2366	28.6641	28.9993	28.9132	29.9038	28.3295
363	P06802	P06802	Ectonucleotide pyrophosphatase/phosphodiesterase family member 1;Alkaline phosphodiesterase I;Nucleotide pyrophosphatase	Enpp1	103.17	8.81125	22		0.923895	0.588494	0.300225	31.5518	31.852	5	5	31.4168	31.1815	31.541	31.5433	32.0763	31.5998	32.1123	31.805	31.9878	31.7551
366	P07214	P07214	SPARC	Sparc	34.45	9.90982	13		0.318171	0.849099	0.187572	33.5996	33.7872	5	5	34.1378	33.7126	33.43	33.7235	32.9941	33.2656	33.6665	34.3061	33.7803	33.9175
367	P07310	P07310	Creatine kinase M-type	Ckm	43.044	10.0762	35		1.04158	0.433823	0.499106	34.5416	35.0407	5	5	35.2731	34.4976	34.546	34.6374	33.754	35.2105	35.2199	34.9286	35.1236	34.7211
368	P07356;REV__Q8BND4	P07356	Annexin A2	Anxa2	38.676	10.2456	42		0.517286	0.806741	0.166547	35.4548	35.6214	5	5	35.3705	35.2651	35.7631	35.325	35.5505	35.6516	35.4959	35.3284	36.058	35.573
369	P07607	P07607	Thymidylate synthase	Tyms	34.958	8.24689	5		0.463795	0.586768	-0.822712	28.6987	28.4467	4	3	28.761	26.5393	29.0581	28.7505	28.2253	27.7448	28.6991	28.8963	25.2404	26.6402
370	P07724	P07724	Serum albumin	Alb	68.692	9.47999	38		0.8625	0.649027	0.263219	33.7644	34.0277	5	5	33.7946	33.854	33.351	33.9074	33.9152	33.8684	34.3155	34.1895	34.1153	33.6496
371	P07742	P07742	Ribonucleoside-diphosphate reductase large subunit	Rrm1	90.209	8.65997	22		0.104036	0.959902	-0.0487114	31.2759	31.2272	5	5	30.8057	31.209	31.6341	31.3316	31.3988	31.2981	31.0586	30.9517	31.582	31.2454
372	P07758;Q00896	P07758;Q00896	Alpha-1-antitrypsin 1-1;Alpha-1-antitrypsin 1-3	Serpina1a;Serpina1c	46.002	8.24615	7		0.964181	0.330138	0.879446	28.1245	29.004	5	5	27.4861	27.4777	27.6344	28.6411	29.3833	28.4629	28.7488	28.4782	30.0638	29.2662
373	P07901	P07901	Heat shock protein HSP 90-alpha	Hsp90aa1	84.787	10.1216	68		0.0833188	0.971124	0.039389	35.7037	35.7431	5	5	35.3139	35.4338	35.8185	36.0581	35.8943	35.5108	35.6581	35.9536	36.0042	35.5888
374	P08003	P08003	Protein disulfide-isomerase A4	Pdia4	71.982	10.0696	43		0.10676	0.958803	0.0521057	35.6364	35.6885	5	5	35.1332	35.4365	35.8552	35.8765	35.8805	35.328	35.7326	35.9339	35.7964	35.6516
375	P08030	P08030	Adenine phosphoribosyltransferase	Aprt	19.724	8.96923	12		1.37427	0.364533	0.489677	30.259	30.7487	5	5	30.5617	30.1355	30.5707	30.4085	29.6184	30.7679	30.5716	31.0056	30.9034	30.4948
379	P08113	P08113	Endoplasmin	Hsp90b1	92.475	10.5517	79		0.0870386	0.959417	0.0626251	37.347	37.4096	5	5	36.9753	36.8251	37.3171	37.9531	37.6642	36.96	37.664	37.8292	37.4484	37.1465
380	P08121	P08121	Collagen alpha-1(III) chain	Col3a1	138.94	8.5579	13		0.759047	0.585936	0.360561	31.4597	31.8203	5	5	31.3909	30.8994	31.6369	32.1364	31.2351	31.6396	31.9729	32.2411	31.636	31.6119
381	P08122	P08122	Collagen alpha-2(IV) chain;Canstatin	Col4a2	167.32	8.15872	8		0.159271	0.914249	-0.115733	30.6846	30.5688	5	5	30.8915	30.3364	30.2946	31.476	30.4244	30.4857	30.9225	30.7453	29.9421	30.7486
382	P08207	P08207	Protein S100-A10	S100a10	11.186	9.24773	8		0.238213	0.892053	-0.141076	29.8128	29.6718	5	5	30.2108	29.8331	30.1764	29.3364	29.5074	29.3176	29.357	29.854	30.2277	29.6024
384	P08249	P08249	Malate dehydrogenase, mitochondrial	Mdh2	35.611	9.57371	27		0.717772	0.645066	0.308815	33.1136	33.4224	5	5	32.7945	32.6512	33.161	33.5669	33.3942	33.0831	33.1531	33.6707	33.7045	33.5005
385	P08414	P08414	Calcium/calmodulin-dependent protein kinase type IV	Camk4	52.627	7.7483	2		1.72439	0.0881008	1.32858	NaN	27.5601	0	5	25.7548	27.1535	27.3799	25.682	25.1875	27.8049	27.4858	27.2292	27.8885	27.3921
387	P08752	P08752	Guanine nucleotide-binding protein G(i) subunit alpha-2	Gnai2	40.489	9.48572	19		0.581185	0.808304	-0.154899	32.7094	32.5545	5	5	32.4985	32.79	32.8165	32.6544	32.7878	32.6875	32.4883	32.1999	32.8843	32.5126
388	P08775	P08775	DNA-directed RNA polymerase II subunit RPB1	Polr2a	217.17	8.08593	24		1.20416	0.376942	-0.529004	30.645	30.116	5	5	30.705	31.1355	30.7899	29.8745	30.7201	30.4388	29.7774	29.8632	30.3307	30.1699
391	P09055	P09055	Integrin beta-1	Itgb1	88.231	8.9637	17		0.266477	0.892286	0.12639	31.7742	31.9006	5	5	31.8501	31.9917	31.782	31.2586	31.9887	31.9838	31.8877	31.452	31.8249	32.3548
392	P09103	P09103	Protein disulfide-isomerase	P4hb	57.058	10.4608	64		0.109587	0.944108	-0.0860405	36.9296	36.8435	5	5	36.3105	36.506	36.9585	37.4582	37.4147	36.2497	36.8182	37.2811	37.1408	36.728
393	P09242	P09242	Alkaline phosphatase, tissue-nonspecific isozyme	Alpl	57.514	8.83574	12		0.0392004	0.987037	0.0314526	30.9856	31.0171	5	5	31.716	31.1494	30.9509	30.5467	30.5651	31.3861	30.8562	31.0743	30.4101	31.3586
394	P09405	P09405	Nucleolin	Ncl	76.722	9.75412	50		0.396318	0.786886	-0.248985	34.787	34.538	5	5	34.7929	34.2843	34.6382	35.4925	34.727	34.4158	35.0731	34.9389	34.2026	34.0595
395	P09411	P09411	Phosphoglycerate kinase 1	Pgk1	44.55	9.41652	32		0.095179	0.969031	-0.042952	33.0576	33.0147	5	5	32.798	32.7639	33.0711	33.1575	33.4977	32.8616	32.8214	33.3538	33.1246	32.9121
397	P09535	P09535	Insulin-like growth factor II;Insulin-like growth factor II;Preptin	Igf2	20.03	9.20202	5		0.101652	0.946241	0.0898773	30.5499	30.6398	5	5	30.7853	30.7697	30.9188	30.2363	30.0396	31.098	30.7433	31.2303	30.4674	29.6599
398	P09541	P09541	Myosin light chain 4	Myl4	21.159	8.71242	7		0.767505	0.343588	1.46153	29.121	29.8201	4	5	29.9897	29.8564	28.6131	28.0249	25.3088	30.8884	30.195	29.3836	30.4365	28.1971
399	P09542	P09542	Myosin light chain 3	Myl3	22.421	8.26656	8	+	2.58388	0.0105714	2.25249	NaN	29.3875	0	4	26.4128	26.8198	27.9704	26.8026	25.812	29.8023	29.2207	29.2813	29.2457	27.5299
400	P09602	P09602	Non-histone chromosomal protein HMG-17	Hmgn2	9.4226	9.88126	3		0.481666	0.583428	0.800444	30.2714	31.0718	5	5	28.666	29.2407	32.1464	30.6686	30.6353	31.4389	31.5535	32.0043	31.0862	29.2763
402	P09671	P09671	Superoxide dismutase [Mn], mitochondrial	Sod2	24.603	8.06674	4	+	2.46361	0.0191186	1.64268	NaN	28.3262	0	5	26.5877	27.0636	26.2709	26.8098	26.6857	29.5159	27.9645	28.8939	27.7476	27.5091
403	P09803	P09803	Cadherin-1;E-Cad/CTF1;E-Cad/CTF2;E-Cad/CTF3	Cdh1	98.255	8.45879	7		0.899943	0.358325	0.858625	29.607	30.4657	5	5	29.912	30.1517	30.7621	28.3964	28.813	30.3028	29.7409	31.1004	30.9416	30.2426
405	Q3THW5;P0C0S6	Q3THW5;P0C0S6	Histone H2A.V;Histone H2A.Z	H2afv;H2afz	13.509	9.79575	7		1.01603	0.26986	1.06397	31.1459	32.2099	5	5	31.813	32.5706	31.3076	29.3704	30.668	32.5092	31.8231	32.1006	32.6467	31.9698
407	P0DP28;P0DP27;P0DP26;Q9D6P8	P0DP28;P0DP27;P0DP26			16.837	8.83259	7		0.65255	0.476	0.785813	29.4491	29.8022	4	5	29.1979	28.7764	29.535	30.2869	27.2858	30.1619	30.4066	30.3229	29.3951	28.7246
408	P10107	P10107	Annexin A1	Anxa1	38.734	9.48854	26		0.822451	0.656482	0.257366	32.8982	33.1555	5	5	33.1385	32.841	32.9903	32.6188	32.9022	33.2044	33.2425	33.1044	33.5376	32.6887
409	P10126	P10126	Elongation factor 1-alpha 1	Eef1a1	50.113	10.892	38		0.544341	0.897332	0.0835678	37.5158	37.5993	5	5	37.4388	37.407	37.6173	37.4662	37.6496	37.5336	37.5336	37.6669	37.7779	37.4847
410	P10404	P10404	MLV-related proviral Env polyprotein;Surface protein;Transmembrane protein		69.612	7.68924	6		0.505751	0.589155	0.621034	27.1794	27.9845	5	3	26.321	26.7452	26.9117	28.6248	27.2943	27.14	27.4371	29.3762	27.9266	27.1222
411	P10493	P10493	Nidogen-1	Nid1	136.54	9.50037	36		0.679789	0.723527	-0.22656	34.2951	34.0686	5	5	34.708	34.3813	34.0473	34.3591	33.98	33.8361	34.12	34.0775	33.8942	34.4151
412	P10605	P10605	Cathepsin B;Cathepsin B light chain;Cathepsin B heavy chain	Ctsb	37.279	9.80864	8		0.013779	0.993559	-0.0161613	33.5472	33.531	5	5	33.1665	33.0363	33.1017	34.2911	34.1403	33.3441	34.2281	34.189	33.1146	32.7794
413	P10630	P10630	Eukaryotic initiation factor 4A-II;Eukaryotic initiation factor 4A-II, N-terminally processed	Eif4a2	46.402	8.79142	33		0.226059	0.897193	-0.130951	30.8755	30.7446	5	5	31.1405	30.8888	30.6483	30.8101	30.8899	30.2471	30.9684	31.1895	30.1703	31.1476
414	P10639	P10639	Thioredoxin	Txn	11.675	9.97216	9		0.360646	0.79608	0.242703	32.9696	33.2123	5	5	32.7289	32.9362	33.0355	33.225	32.9225	32.5398	33.367	34.0588	33.4804	32.6157
418	P10852	P10852	4F2 cell-surface antigen heavy chain	Slc3a2	58.336	8.61604	15		0.0349687	0.989509	-0.0243786	30.5375	30.5131	5	5	30.0141	30.1284	30.8471	30.7764	30.9215	30.2592	30.2908	30.2771	30.7729	30.9656
419	P10853;Q8CGP2;Q64475;Q8CGP1;P70696;Q64524	P10853;Q8CGP2;Q64475;Q8CGP1;P70696	Histone H2B type 1-F/J/L;Histone H2B type 1-P;Histone H2B type 1-B;Histone H2B type 1-K;Histone H2B type 1-A	Hist1h2bf;Hist1h2bp;Hist1h2bb;Hist1h2bk;Hist1h2ba	13.936	11.0597	23		0.931255	0.34347	0.859785	35.9268	36.7866	5	5	35.3986	35.6159	36.5541	35.282	36.7834	36.8838	36.6843	36.5839	38.0723	35.7087
420	P10922	P10922	Histone H1.0;Histone H1.0, N-terminally processed	H1f0	20.861	10.0244	8		0.143768	0.903745	-0.238184	32.3553	32.1171	5	5	32.4201	33.0032	30.8501	32.1659	33.337	32.2623	31.5057	30.886	32.2324	33.6989
422	P11031	P11031	Activated RNA polymerase II transcriptional coactivator p15	Sub1	14.427	9.69438	6		1.86281	0.154225	0.761317	31.1848	31.9461	5	5	30.9886	31.4029	31.1639	31.3252	31.0432	31.1855	31.6493	32.3435	32.2318	32.3204
423	P11087;CON__Q862S4	P11087	Collagen alpha-1(I) chain	Col1a1	138.03	9.71263	40		0.189178	0.901918	-0.135477	35.5621	35.4266	5	5	35.8645	35.56	35.3078	36.2134	34.8646	35.0426	35.6332	35.8873	35.0488	35.521
424	P11103	P11103	Poly [ADP-ribose] polymerase 1	Parp1	113.1	8.90283	24		0.0201138	0.993526	-0.0168789	32.2149	32.198	5	5	31.934	32.1995	32.7043	31.448	32.7885	32.3205	31.7647	31.9463	32.5075	32.4509
427	P11276	P11276	Fibronectin;Anastellin	Fn1	272.53	9.99842	145		0.339082	0.87518	-0.140092	37.0692	36.9291	5	5	37.5939	37.0121	36.782	37.092	36.8659	37.0755	37.1808	37.0264	36.5677	36.7951
428	P11352	P11352	Glutathione peroxidase 1	Gpx1	22.329	8.62167	6		0.852244	0.411022	0.719493	29.1967	29.9162	5	5	28.0105	28.615	29.4139	29.8908	30.0531	29.5126	29.722	30.6101	30.1635	29.5725
430	P11438	P11438	Lysosome-associated membrane glycoprotein 1	Lamp1	43.865	8.5014	4		0.393918	0.655782	-0.717289	29.4752	29.4289	5	4	28.5319	28.5419	29.9739	29.7693	30.559	29.2743	30.1657	28.7997	29.4761	26.0739
431	P11440;Q80YP0;Q3V3A1	P11440	Cyclin-dependent kinase 1	Cdk1	34.106	9.02588	18		1.03	0.466985	-0.44267	31.4676	31.0249	5	5	31.1339	31.6962	31.361	31.4062	31.7405	31.1976	30.2395	31.2721	31.0454	31.3699
432	P11499	P11499	Heat shock protein HSP 90-beta	Hsp90ab1	83.28	10.5714	78		0.282676	0.903816	-0.0920502	37.2496	37.1575	5	5	37.1032	36.9163	37.209	37.6015	37.4179	37.0243	37.1061	37.1653	37.4115	37.0804
434	P11688	P11688	Integrin alpha-5;Integrin alpha-5 heavy chain;Integrin alpha-5 light chain	Itga5	115.04	8.88429	18		0.717504	0.656556	0.281516	31.9271	32.2086	5	5	31.8672	31.8703	31.564	32.4774	31.8567	31.8104	32.4458	32.383	32.4111	31.9928
435	P11862	P11862	Growth arrest-specific protein 2	Gas2	34.9	7.68503	7		0.777714	0.411892	0.865725	NaN	28.0368	0	4	27.8734	27.3375	26.7965	27.3593	25.1935	28.0223	27.6202	27.7038	28.8009	26.7417
437	P11983	P11983	T-complex protein 1 subunit alpha	Tcp1	60.448	9.64383	42		0.914491	0.718602	-0.194643	34.233	34.0384	5	5	34.3893	34.1828	34.1087	34.2145	34.2699	34.0155	34.176	34.055	34.2732	33.6723
438	P12023	P12023	Amyloid beta A4 protein;N-APP;Soluble APP-alpha;Soluble APP-beta;C99;Beta-amyloid protein 42;Beta-amyloid protein 40;C83;P3(42);P3(40);C80;Gamma-secretase C-terminal fragment 59;Gamma-secretase C-terminal fragment 57;Gamma-secretase C-terminal fragment 50;C31	App	86.721	8.0187	6		0.0739639	0.969846	0.0507904	28.8829	28.9337	5	5	28.3714	29.2115	28.9397	28.7388	29.1531	29.2151	29.5072	28.8574	28.378	28.7107
439	P12025	P12025	Midkine	Mdk	15.434	8.27644	6	+	1.91032	0.0401928	1.8593	NaN	28.1088	0	4	26.5327	26.1979	25.1503	27.4946	25.2286	27.4654	27.6507	28.0245	29.4252	27.3349
441	P12367	P12367	cAMP-dependent protein kinase type II-alpha regulatory subunit	Prkar2a	45.389	9.14538	17		0.41433	0.795017	0.210848	31.648	31.8589	5	5	31.4489	31.386	31.4515	32.3158	31.638	31.3514	32.1842	32.1593	31.8111	31.7883
442	P12382	P12382	ATP-dependent 6-phosphofructokinase, liver type	Pfkl	85.359	9.37103	40		0.30073	0.875941	-0.152388	33.1163	32.9639	5	5	33.2016	33.319	33.2774	32.6586	33.1248	33.2997	32.6269	32.4459	33.1258	33.3212
443	P12787	P12787	Cytochrome c oxidase subunit 5A, mitochondrial	Cox5a	16.101	8.74395	8		0.848879	0.339375	1.09353	28.8434	29.9369	5	5	28.6514	29.0299	29.9211	28.0103	28.6043	30.0437	30.8297	30.7601	30.4153	27.6357
444	P12815	P12815	Programmed cell death protein 6	Pdcd6	21.867	8.56925	6		0.180738	0.909514	-0.112225	29.1581	29.0459	5	5	29.2469	28.5639	28.9338	29.6348	29.4112	28.9558	28.9164	28.7811	29.6684	28.9077
445	P12970	P12970	60S ribosomal protein L7a	Rpl7a	29.976	10.0134	23		0.378102	0.743144	-0.378773	33.7041	33.3253	5	5	34.1163	34.4617	33.1074	32.7743	34.0609	33.7009	32.3181	32.9461	33.6799	33.9817
447	P13020	P13020	Gelsolin	Gsn	85.941	9.60293	42		0.467911	0.793253	0.198144	33.9096	34.1077	5	5	34.2788	33.908	33.7988	33.9097	33.6525	33.8391	33.689	34.0376	34.414	34.5588
448	P13412	P13412	Troponin I, fast skeletal muscle	Tnni2	21.357	8.08261	1		0.208215	0.896953	0.1543	NaN	27.3022	0	4	26.1351	27.7759	26.9391	27.3463	27.1367	26.9478	27.5066	27.3935	27.3608	26.8959
449	P13439	P13439	Uridine 5-monophosphate synthase;Orotate phosphoribosyltransferase;Orotidine 5-phosphate decarboxylase	Umps	52.292	8.89772	19		0.230091	0.887505	0.15405	31.276	31.4301	5	5	30.8474	30.7409	31.3757	31.8314	31.5847	31.2397	31.5936	31.4203	31.9723	30.9246
450	P13541	P13541	Myosin-3	Myh3	223.79	10.1614	223		0.173483	0.903146	0.1571	37.2133	37.3704	5	5	37.8306	37.8637	36.7887	36.9687	36.615	38.0115	37.3089	36.5621	37.3465	37.6231
451	P13542;Q99MZ6;P97479	P13542	Myosin-8	Myh8	222.7	10.5764	232		0.0862459	0.950327	0.100423	38.4814	38.5818	5	5	39.4892	39.0652	38.0147	38.1519	37.686	39.363	38.4631	37.7875	38.4696	38.8258
452	P13595	P13595	Neural cell adhesion molecule 1	Ncam1	119.43	8.48206	17		0.0121876	0.994112	0.00898209	30.6659	30.6749	5	5	30.6838	30.9442	30.9624	30.3045	30.4346	31.2288	30.4865	29.9625	30.8553	30.8412
453	P13864	P13864	DNA (cytosine-5)-methyltransferase 1	Dnmt1	183.19	7.99243	21		0.289152	0.813376	-0.292391	29.8753	29.5829	5	5	29.7695	30.8576	30.3013	28.9176	29.5305	30.1738	28.8774	29.1427	29.4883	30.2323
454	P14106	P14106	Complement C1q subcomponent subunit B	C1qb	26.717	9.04222	6		0.267624	0.857929	-0.214864	30.7957	30.5808	5	5	30.5902	29.9898	30.4518	31.5388	31.4079	30.1678	30.6314	31.0109	30.8264	30.2677
455	P14115	P14115	60S ribosomal protein L27a	Rpl27a	16.605	9.88906	10		0.259572	0.84949	0.239894	32.4244	32.6643	5	5	32.6975	33.0587	32.3307	31.1582	32.877	33.1265	32.0486	32.5594	32.6793	32.9078
456	P14131	P14131	40S ribosomal protein S16	Rps16	16.445	9.9281	17		0.519483	0.645816	0.448638	33.0548	33.5035	5	5	32.8827	33.638	33.7874	31.7538	33.2122	33.8223	32.9238	33.319	33.969	33.483
457	P14148	P14148	60S ribosomal protein L7	Rpl7	31.419	9.73842	22		0.0651937	0.960445	0.0944725	32.8268	32.9213	5	5	33.3866	34.046	32.3087	31.3465	33.0463	33.549	32.7602	32.9682	32.1325	33.1965
458	P14152	P14152	Malate dehydrogenase, cytoplasmic	Mdh1	36.511	8.79585	7		1.20137	0.365371	0.553675	29.8873	30.441	5	5	29.3149	29.4239	30.1343	30.1411	30.4224	30.1446	30.4413	30.4454	30.9266	30.2472
459	P14206	P14206	40S ribosomal protein SA	Rpsa	32.838	9.896	21		0.640176	0.750824	0.205804	33.5241	33.7299	5	5	33.3432	33.6193	33.5616	33.71	33.3866	33.5309	33.6666	33.808	34.232	33.4122
460	P14211	P14211	Calreticulin	Calr	47.994	9.72358	31		0.416113	0.834197	-0.16657	34.0771	33.9106	5	5	34.2728	33.761	33.7782	34.3987	34.175	33.5447	33.8508	34.3003	33.8223	34.0347
462	P14576	P14576	Signal recognition particle 54 kDa protein	Srp54	55.72	8.41959	17		0.18458	0.897842	0.16431	29.7368	29.9012	5	5	29.7768	29.8224	30.3695	28.6659	30.0496	29.6756	29.4687	30.1385	30.5867	29.6363
463	P14602	P14602	Heat shock protein beta-1	Hspb1	23.014	9.51367	13		0.220785	0.865619	0.275802	32.0675	32.3433	5	5	33.3142	32.8605	31.3729	31.736	31.0537	33.1335	32.313	32.1118	31.5667	32.5913
464	P14685	P14685	26S proteasome non-ATPase regulatory subunit 3	Psmd3	60.718	8.98259	24		0.389359	0.796383	-0.224596	31.8945	31.67	5	5	32.0965	32.3729	32.1426	31.2634	31.5973	32.17	31.2269	31.4565	31.7714	31.725
465	P14733	P14733	Lamin-B1	Lmnb1	66.785	10.2663	71		0.0317083	0.990588	-0.0175308	36.3247	36.3072	5	5	35.9875	36.001	36.2697	36.8558	36.5095	36.1133	36.5681	36.5339	36.1863	36.1344
466	P14824	P14824	Annexin A6	Anxa6	75.884	9.74392	68		0.153604	0.903818	0.168241	34.732	34.9003	5	5	34.2407	34.1097	34.6758	34.9774	35.6566	34.2117	34.6335	34.9295	36.0977	34.629
467	P14869	P14869	60S acidic ribosomal protein P0	Rplp0	34.216	10.2203	21		0.184959	0.918101	0.0849129	34.6723	34.7572	5	5	34.1937	34.6543	34.8488	34.5522	35.1123	34.6883	34.8339	34.8092	35.0259	34.4285
470	P15089	P15089	Mast cell carboxypeptidase A	Cpa3	48.789	7.92908	4	+	2.64265	0.0168	1.68958	NaN	28.2184	0	5	27.3236	25.8217	26.447	26.4107	26.6408	29.1654	27.7982	27.5735	27.9007	28.654
472	P15379	P15379	CD44 antigen	Cd44	85.616	8.4009	3		0.723531	0.475585	-0.653392	29.4786	28.8252	5	5	30.0534	29.9632	28.8095	29.6172	28.9497	29.9712	28.2982	28.6407	27.8627	29.3534
473	P15532	P15532	Nucleoside diphosphate kinase A	Nme1	17.208	8.55914	6		0.851153	0.439838	0.612535	28.5913	29.2039	5	5	28.0418	28.0051	28.7869	28.9119	29.211	29.0337	28.9657	29.8511	29.8282	28.3406
475	P15655	P15655	Fibroblast growth factor 2	Fgf2	17.153	8.9086	3		0.458387	0.598552	-0.741301	28.347	NaN	4	0	28.2467	28.1785	28.821	25.1527	28.1418	26.5321	27.1115	26.5518	26.3292	28.3096
476	P15864;Q07133	P15864	Histone H1.2	Hist1h1c	21.266	10.7811	22		0.0541277	0.969148	0.0782944	35.8043	35.8826	5	5	34.9401	36.2834	34.761	35.9985	37.0386	35.7273	35.6554	34.9985	36.5823	36.4497
477	P16045	P16045	Galectin-1	Lgals1	14.866	10.3647	9		0.645813	0.702464	0.252584	34.4993	34.7519	5	5	34.4889	34.4397	34.8656	34.492	34.2102	34.5575	34.4757	35.2649	34.464	34.9971
479	P16110	P16110	Galectin-3	Lgals3	27.515	9.50389	10		0.767851	0.407754	0.915872	30.9927	31.9086	5	5	31.0947	31.4512	32.4326	30.0411	29.9441	32.1342	31.8552	31.9189	33.0491	30.5857
480	P16125	P16125	L-lactate dehydrogenase B chain	Ldhb	36.572	8.40944	9		1.79539	0.112938	-0.999689	29.3486	28.5672	5	4	28.894	29.5655	29.6995	28.8097	29.7743	28.6338	28.5803	28.1089	27.4755	28.946
482	P16460	P16460	Argininosuccinate synthase	Ass1	46.584	7.90049	7		1.43904	0.154817	1.09832	NaN	28.2604	0	5	26.4392	28.266	27.3041	26.3836	27.4177	28.419	28.1632	28.9749	27.3473	28.3978
483	P16546	P16546	Spectrin alpha chain, non-erythrocytic 1	Sptan1	284.59	9.48339	162		0.873907	0.691523	0.217673	35.6429	35.8606	5	5	35.6648	35.5891	35.5137	35.9598	35.4872	35.6308	36.1409	35.8218	36.0316	35.6778
484	P16675	P16675	Lysosomal protective protein;Lysosomal protective protein 32 kDa chain;Lysosomal protective protein 20 kDa chain	Ctsa	53.844	9.14267	14		0.474634	0.770859	0.237725	31.6266	31.8643	5	5	31.6557	31.5603	31.7147	32.0896	31.1127	31.8977	32.0506	32.3021	31.8004	31.2708
485	P16858;Q64467	P16858	Glyceraldehyde-3-phosphate dehydrogenase	Gapdh	35.81	10.9806	37		0.114822	0.958743	0.0507965	37.2399	37.2907	5	5	37.0668	36.8599	37.2091	37.5516	37.512	37.0781	37.2148	37.6466	37.3709	37.1431
486	P17012;P23607	P17012;P23607	Zinc finger X-chromosomal protein;Zinc finger autosomal protein	Zfx;Zfa	90.025	7.99528	8		0.526677	0.694742	0.317918	28.1863	28.2886	4	5	28.4049	28.3734	27.8506	28.1165	27.1082	28.7536	28.4327	28.3374	27.8163	28.103
487	P17047	P17047	Lysosome-associated membrane glycoprotein 2	Lamp2	45.681	8.64274	7		0.485264	0.697592	-0.347803	30.2406	29.8928	5	5	29.2474	30.0976	30.1845	30.8029	30.8707	29.6254	30.3166	29.9154	30.1426	29.4642
488	P17141;Q80W31	P17141	Zinc finger protein 37	Zfp37	67.226	7.86091	6		0.280195	0.825778	-0.280459	28.184	28.523	5	3	28.1239	28.6912	28.2756	27.7621	28.0672	28.5616	26.8514	27.0975	28.8063	28.201
489	P17156	P17156	Heat shock-related 70 kDa protein 2	Hspa2	69.641	8.52329	31		0.17205	0.904292	-0.160712	30.5903	30.4296	5	5	30.3114	29.9366	30.672	31.2159	30.8157	29.9792	31.0846	31.0557	29.5849	30.4436
490	P17182	P17182	Alpha-enolase	Eno1	47.14	10.8238	48		0.154576	0.915294	0.113132	37.3319	37.445	5	5	37.0031	36.845	37.2298	37.9105	37.6712	37.0627	37.7219	37.944	37.6056	36.891
491	P17225;B2RU80	P17225	Polypyrimidine tract-binding protein 1	Ptbp1	56.477	9.5251	22		0.0258386	0.99449	0.011087	33.0112	33.0223	5	5	32.7445	33.0227	33.4592	32.8912	32.9387	33.0087	32.843	32.8558	33.0936	33.3105
492	P17426	P17426	AP-2 complex subunit alpha-1	Ap2a1	107.66	8.03663	26		0.0789113	0.970044	-0.0430279	29.4192	29.3762	5	5	29.1645	29.8774	29.5368	29.5445	28.9728	29.6973	29.5828	29.0952	29.3745	29.1312
493	P17427	P17427	AP-2 complex subunit alpha-2	Ap2a2	104.02	8.79688	33		0.239573	0.889551	-0.144139	31.8937	31.7496	5	5	31.9853	32.1594	32.1758	31.3486	31.7996	32.028	31.3982	31.2865	31.7021	32.3332
494	P17439	P17439	Glucosylceramidase	Gba	57.621	7.84112	7		1.43534	0.189843	-0.902169	28.0352	NaN	5	0	27.4962	27.8939	28.7445	28.0784	27.9631	27.7513	27.7416	26.9315	27.0981	26.1428
497	P17710;Q91W97;Q3TRM8	P17710	Hexokinase-1	Hk1	108.3	8.11684	22		0.485331	0.672551	-0.405237	29.7985	29.3932	5	5	30.4388	30.258	30.2151	28.9403	29.1401	29.7133	28.7986	28.8918	29.6375	29.9249
498	P17742	P17742	Peptidyl-prolyl cis-trans isomerase A;Peptidyl-prolyl cis-trans isomerase A, N-terminally processed	Ppia	17.971	9.85529	16		0.383677	0.741717	0.388152	32.7525	33.1407	5	5	32.295	32.0258	32.8299	32.8982	33.7139	32.1357	32.9538	34.1438	33.6157	32.8546
499	P17751	P17751	Triosephosphate isomerase	Tpi1	32.191	9.47576	17		0.294444	0.859388	0.187269	32.7791	32.9664	5	5	32.4302	32.2828	32.953	33.2178	33.0119	32.5989	32.8871	33.3308	33.5253	32.4899
500	P17809	P17809	Solute carrier family 2, facilitated glucose transporter member 1	Slc2a1	53.984	8.27628	2		1.25455	0.173746	1.31948	NaN	28.6203	0	4	26.8362	26.9077	26.9327	26.6768	26.6648	29.8287	28.2249	28.239	26.1345	28.1887
502	P17897	P17897	Lysozyme C-1	Lyz1	16.794	9.23289	10		0.696116	0.3795	1.55944	30.7451	30.5579	3	5	31.1804	30.1573	30.8976	26.6954	26.0616	30.9494	30.4558	31.1033	30.7069	29.5742
503	P17918	P17918	Proliferating cell nuclear antigen	Pcna	28.785	9.69985	17		0.0393489	0.988678	0.0296196	33.3684	33.398	5	5	33.0416	32.8449	33.47	33.747	33.7383	32.9469	33.4579	33.8528	33.7566	32.9757
504	P18155	P18155	Bifunctional methylenetetrahydrofolate dehydrogenase/cyclohydrolase, mitochondrial;NAD-dependent methylenetetrahydrofolate dehydrogenase;Methenyltetrahydrofolate cyclohydrolase	Mthfd2	37.863	8.10701	5		0.248888	0.863244	0.227129	28.3463	28.5735	5	5	27.8168	28.3579	29.3772	28.335	27.8448	28.5903	28.461	29.1299	28.9843	27.7018
505	P18242	P18242	Cathepsin D	Ctsd	44.953	9.62297	13		0.258426	0.859485	0.22303	33.1387	33.3617	5	5	32.4488	32.7128	33.0265	33.9346	33.5707	33.0176	33.6517	34.1039	33.2358	32.7995
506	P18572	P18572	Basigin	Bsg	42.444	9.38421	10		0.263702	0.88189	0.14165	32.4667	32.6083	5	5	31.8245	32.3461	32.6663	32.7147	32.7818	32.2495	32.5558	32.3911	32.9268	32.9185
508	P18654;Q9WUT3;Q7TPS0	P18654	Ribosomal protein S6 kinase alpha-3	Rps6ka3	83.693	8.09875	8		0.221629	0.89769	0.138019	29.2479	29.3859	5	5	29.3306	29.3347	29.3332	29.1525	29.0884	29.8033	28.4625	29.407	29.4292	29.8275
509	P18760	P18760	Cofilin-1	Cfl1	18.559	9.76136	20		0.497203	0.69094	0.351413	32.6883	33.0397	5	5	32.2637	32.2176	33.3233	32.5802	33.0567	32.7406	33.4452	33.7107	32.9843	32.318
511	P19096	P19096	Fatty acid synthase;[Acyl-carrier-protein] S-acetyltransferase;[Acyl-carrier-protein] S-malonyltransferase;3-oxoacyl-[acyl-carrier-protein] synthase;3-oxoacyl-[acyl-carrier-protein] reductase;3-hydroxyacyl-[acyl-carrier-protein] dehydratase;Enoyl-[acyl-carrier-protein] reductase;Oleoyl-[acyl-carrier-protein] hydrolase	Fasn	272.43	9.17869	101		1.14306	0.443449	-0.428673	34.5177	34.0891	5	5	34.7057	34.7649	34.65	33.9278	34.5403	34.4084	33.8503	33.6959	34.1214	34.3692
513	P19157;P46425	P19157;P46425	Glutathione S-transferase P 1;Glutathione S-transferase P 2	Gstp1;Gstp2	23.609	8.8717	8		0.755698	0.47472	0.618395	29.7713	30.3897	5	5	29.1355	29.4429	30.302	29.8063	30.1697	29.6008	30.2347	30.8242	31.5229	29.7659
514	P19221	P19221	Prothrombin;Activation peptide fragment 1;Activation peptide fragment 2;Thrombin light chain;Thrombin heavy chain	F2	70.268	8.1183	10		0.488699	0.66857	0.411845	28.5275	28.9393	5	5	28.6745	28.5859	28.2669	28.4279	28.6822	29.6316	27.8185	28.2044	29.5253	29.5168
515	P19253	P19253	60S ribosomal protein L13a	Rpl13a	23.464	9.61105	11		0.20285	0.876161	0.241216	31.7473	31.9885	5	5	32.2971	32.9538	31.3483	30.3171	31.8203	32.2969	31.7595	31.6114	31.7827	32.4922
516	P19324	P19324	Serpin H1	Serpinh1	46.533	11.0848	46		0.137749	0.934728	0.0821388	38.0628	38.1449	5	5	37.6999	37.7405	38.0527	38.4743	38.3465	37.6819	38.1497	38.6512	38.3258	37.9161
517	P19536	P19536	Cytochrome c oxidase subunit 5B, mitochondrial	Cox5b	13.813	9.16599	6		1.10704	0.216096	1.23031	29.6858	30.9161	5	5	29.8762	30.0648	31.2476	28.5432	28.6972	30.8594	31.6741	31.3476	31.0974	29.6022
518	P19783	P19783	Cytochrome c oxidase subunit 4 isoform 1, mitochondrial	Cox4i1	19.53	9.16616	9		0.72075	0.668018	0.271738	30.8054	31.0771	5	5	30.6189	31.1159	30.4916	30.9877	30.8128	31.256	31.4168	31.0148	30.5307	31.1672
519	P19788	P19788	Matrix Gla protein	Mgp	12.359	8.76779	2		0.0132283	0.993576	0.0207577	28.215	28.8937	4	3	28.2293	27.9878	27.4893	28.1291	28.5137	28.8239	26.9983	29.3052	28.5521	26.7734
520	P20029	P20029	78 kDa glucose-regulated protein	Hspa5	72.421	10.1375	65		0.0710519	0.978532	0.0337349	35.6591	35.6928	5	5	35.5498	35.3428	35.4803	36.088	35.8346	35.3356	35.6632	35.9988	35.7835	35.6832
522	P20108	P20108	Thioredoxin-dependent peroxide reductase, mitochondrial	Prdx3	28.127	8.8185	8		0.246727	0.882611	0.149418	30.43	30.5794	5	5	29.9867	29.9176	30.5721	30.9401	30.7335	30.355	30.4192	30.2941	31.0497	30.7791
523	P20152;P03995;P46660	P20152	Vimentin	Vim	53.687	10.684	77		0.281279	0.913131	0.0742714	37.5346	37.6088	5	5	37.8441	37.6068	37.2206	37.4888	37.5124	37.5775	37.6165	37.6396	37.7527	37.4578
524	P20444;P68404;P63318	P20444	Protein kinase C alpha type	Prkca	76.851	8.11869	8		0.0211541	0.993436	-0.0100475	29.1746	29.1646	5	5	28.8007	29.2318	29.4816	29.2021	29.157	29.2786	29.1949	29.0853	29.5014	28.7627
525	P20801	P20801	Troponin C, skeletal muscle	Tnnc2	18.11	8.30183	6		0.377379	0.645611	-1.11817	27.4054	26.232	3	5	29.5717	28.7091	23.9353	26.9288	27.606	29.5533	24.6136	26.4056	24.856	25.7316
526	P20918	P20918	Plasminogen;Plasmin heavy chain A;Activation peptide;Angiostatin;Plasmin heavy chain A, short form;Plasmin light chain B	Plg	90.807	8.58882	18		0.830726	0.549709	-0.38973	31.1912	30.8014	5	5	31.7996	31.4931	30.6798	31.1425	30.8408	31.1956	30.6376	30.5644	30.5855	31.0241
527	P21107	P21107	Tropomyosin alpha-3 chain	Tpm3	32.994	9.20415	37		1.02305	0.310934	0.854501	30.971	31.8255	5	5	31.6462	31.8268	30.5742	31.1964	29.6112	31.6981	32.1398	32.0666	32.1406	31.0822
528	P21278;P30677;O70443;P27601	P21278	Guanine nucleotide-binding protein subunit alpha-11	Gna11	42.024	8.51908	8		0.109004	0.951107	0.0671223	29.5283	29.5955	5	5	29.516	29.5017	29.8761	29.3202	29.4278	30.2495	29.232	29.2385	29.941	29.3162
529	P21279	P21279	Guanine nucleotide-binding protein G(q) subunit alpha	Gnaq	42.158	8.14947	7		0.501693	0.651995	-0.432825	28.4355	28.0027	5	5	28.3883	28.4529	28.5273	28.5108	28.2984	28.5849	28.9371	26.9052	27.1929	28.3933
530	P21460	P21460	Cystatin-C	Cst3	15.531	8.30352	2		1.01785	0.292325	0.939372	NaN	28.267	0	4	27.1528	26.6624	26.9876	26.6752	26.8739	25.9806	28.6787	28.4305	28.3271	27.6318
531	P21550	P21550	Beta-enolase	Eno3	47.024	10.0693	34		2.10699	0.179803	0.619557	34.4701	35.0896	5	5	34.9461	34.29	34.3058	34.6609	34.1476	35.3223	35.2728	35.0997	34.9596	34.7937
532	P21570	P21570	Angiogenin	Ang	16.228	8.73082	7		0.925479	0.272131	1.32593	29.3095	29.4737	3	5	29.0549	29.3047	29.5689	25.9793	26.8308	29.6046	28.8513	29.5863	30.1162	29.2099
533	P21619	P21619	Lamin-B2	Lmnb2	67.317	9.29241	39		0.140897	0.940531	0.0700066	33.1137	33.1837	5	5	33.0586	33.1554	32.9204	33.7317	32.7024	33.084	33.275	33.46	33.0111	33.0884
534	P21844	P21844	Chymase	Cma1	27.586	8.33199	5	+	2.70528	0.0103256	2.00714	NaN	29.2811	0	4	26.6929	26.9318	28.3876	26.323	26.8135	29.3092	28.9125	28.0599	29.6205	29.2823
536	P21956	P21956	Lactadherin	Mfge8	51.24	9.98513	34		1.91899	0.475521	-0.278138	34.7606	34.4825	5	5	34.9721	34.7538	34.5072	34.7048	34.8654	34.5176	34.594	34.4596	34.4616	34.3797
537	P21981	P21981	Protein-glutamine gamma-glutamyltransferase 2	Tgm2	77.06	8.70525	9		0.544376	0.771812	-0.206853	31.1528	30.946	5	5	31.3992	31.203	30.6774	31.1097	31.3748	31.2033	30.9657	30.6946	31.2355	30.6307
538	P22315	P22315	Ferrochelatase, mitochondrial	Fech	47.13	8.22446	8		0.0696227	0.953923	-0.147987	28.8671	28.9285	4	2	29.5674	30.2055	28.0793	27.6164	26.407	29.5019	28.0549	28.355	27.753	27.4708
540	P22892	P22892	AP-1 complex subunit gamma-1	Ap1g1	91.349	8.10353	11		0.850212	0.295534	-1.47446	29.2572	29.1685	5	3	29.4414	29.6826	29.5907	28.735	28.8361	28.7503	26.3237	25.0843	29.1519	29.6034
542	P22935	P22935	Cellular retinoic acid-binding protein 2	Crabp2	15.746	8.64532	5		0.45645	0.655647	0.499674	29.007	29.0808	4	5	26.8778	28.2946	29.3262	29.3887	29.0184	28.4686	29.2028	29.3884	29.4692	28.875
543	P23116	P23116	Eukaryotic translation initiation factor 3 subunit A	Eif3a	161.93	9.53916	91		0.0782786	0.969682	0.0441757	34.5079	34.5521	5	5	34.5622	34.8276	34.8146	34.1272	34.2078	34.8998	34.6635	34.305	34.1358	34.7561
544	P23198	P23198	Chromobox protein homolog 3	Cbx3	20.855	9.64566	8		1.27475	0.2596	0.770761	31.5451	32.3158	5	5	30.9359	31.0735	32.3782	31.5419	31.7959	32.1297	32.4719	32.8606	32.5446	31.5723
545	P23249	P23249	Putative helicase MOV-10	Mov10	113.58	8.29925	23		0.196215	0.893495	0.17421	30.2162	30.3904	5	5	29.6803	30.7522	30.7894	29.3355	30.5236	30.5546	29.8137	30.3686	30.2279	30.9872
546	P23475	P23475	X-ray repair cross-complementing protein 6	Xrcc6	69.483	7.99485	9		0.508962	0.769942	0.217121	28.3507	28.5678	5	5	27.7479	28.7085	28.3401	28.3651	28.5919	28.5274	28.4925	28.9432	28.251	28.6251
547	P23506	P23506	Protein-L-isoaspartate(D-aspartate) O-methyltransferase	Pcmt1	24.634	9.12294	13		0.973148	0.348032	0.780347	30.5541	31.3344	5	5	31.1106	30.8037	31.3239	29.6482	29.8841	31.0371	31.7473	32.0874	31.2486	30.5518
548	P23927	P23927	Alpha-crystallin B chain	Cryab	20.069	9.1778	6		0.759628	0.357608	1.37818	29.722	31.1002	5	5	31.9275	31.3445	29.3978	28.0539	27.8862	32.6723	30.5686	31.057	30.4483	30.7546
549	P24270	P24270	Catalase	Cat	59.795	7.83684	4		0.206887	0.876078	0.237079	28.2678	28.4531	4	4	28.9322	27.7561	28.1951	28.1879	26.9032	28.3823	28.9246	28.8699	27.6357	27.3473
550	P24369	P24369	Peptidyl-prolyl cis-trans isomerase B	Ppib	23.713	10.2364	20		0.168104	0.910803	0.125722	34.4038	34.5295	5	5	34.0381	34.0949	34.6753	33.983	35.2275	34.0326	34.2336	34.7015	34.8272	34.8524
551	P24452	P24452	Macrophage-capping protein	Capg	39.24	8.61912	7		0.743905	0.589176	0.3558	29.2027	29.5585	5	5	29.114	28.4417	29.3047	29.6278	29.5253	29.6845	29.4303	29.6786	29.8456	29.1537
552	P24527	P24527	Leukotriene A-4 hydrolase	Lta4h	69.05	7.35261	2		0.268405	0.875671	0.172456	26.8909	27.0217	3	4	27.1959	26.854	27.2111	26.5757	26.886	26.7953	26.5431	26.8989	27.8496	27.4982
553	P24547	P24547	Inosine-5-monophosphate dehydrogenase 2	Impdh2	55.814	9.46471	23		0.390684	0.848211	0.158041	32.9696	33.1276	5	5	32.8544	32.6883	32.8328	33.2716	33.2008	32.7304	33.171	33.601	33.0187	33.1168
554	P24668	P24668	Cation-dependent mannose-6-phosphate receptor	M6pr	31.172	8.30795	5		0.163586	0.897838	-0.2282	28.4015	28.1733	5	5	28.1745	28.6386	29.3016	28.2363	27.6564	29.1752	28.4237	27.7366	26.5742	28.9567
555	P24788	P24788	Cyclin-dependent kinase 11B	Cdk11b	91.512	7.71305	7	+	2.28347	0.0287536	-1.56294	28.4111	NaN	5	0	28.7217	28.6447	27.6614	29.0333	27.9946	26.7422	27.4084	25.6342	27.3149	27.1411
556	P25206	P25206	DNA replication licensing factor MCM3	Mcm3	91.545	9.14557	35		0.421606	0.873961	0.11886	33.0031	33.1219	5	5	33.1395	33.1316	33.2099	32.7422	32.7922	33.2271	32.9625	32.894	33.2046	33.3215
558	P25444	P25444	40S ribosomal protein S2	Rps2	31.231	9.77065	25		0.207236	0.901175	-0.135037	33.692	33.557	5	5	33.5566	34.0542	33.3821	33.3468	34.1205	33.4653	32.8352	33.6386	33.815	34.0309
559	P25799	P25799	Nuclear factor NF-kappa-B p105 subunit;Nuclear factor NF-kappa-B p50 subunit	Nfkb1	105.61	8.0798	9		0.291058	0.84988	0.20319	29.3865	29.5896	5	5	29.4795	28.5885	29.0253	29.8539	29.9851	29.3145	29.8251	29.523	30.001	29.2846
560	P25976	P25976	Nucleolar transcription factor 1	Ubtf	89.508	8.89385	24		0.9271	0.599209	-0.285148	31.8091	31.524	5	5	31.7671	31.7792	31.6531	31.9621	31.8842	31.8307	31.7547	30.9927	31.6718	31.3699
561	P26039	P26039	Talin-1	Tln1	269.82	9.39796	139		0.047801	0.991055	0.0145134	35.3337	35.3483	5	5	35.3695	35.2423	35.4144	35.1502	35.4924	35.1557	35.2494	35.2483	35.6487	35.4391
562	P26040	P26040	Ezrin	Ezr	69.406	8.97555	35		1.83071	0.242066	0.552127	31.671	32.2231	5	5	31.2467	31.4486	31.9967	31.8309	31.8322	31.9577	32.324	32.1658	32.5992	32.0691
563	P26041	P26041	Moesin	Msn	67.766	9.55351	46		1.22138	0.339778	0.593884	33.4628	34.0567	5	5	33.0009	33.0813	33.7035	33.3979	34.1306	33.8169	33.7591	33.8176	34.6698	34.2201
564	P26043	P26043	Radixin	Rdx	68.542	8.85408	30		1.24278	0.357168	0.546814	31.1227	31.6695	5	5	30.6799	30.786	31.6637	30.9902	31.4935	31.7051	31.2552	31.4226	32.0978	31.8667
565	P26231;Q61301;Q65CL1	P26231	Catenin alpha-1	Ctnna1	100.11	8.1765	21		0.662569	0.576033	0.443965	29.5624	30.0064	5	5	29.198	30.1567	30.1912	28.9756	29.2905	30.3903	29.9484	29.5922	30.5863	29.5147
566	P26350	P26350	Prothymosin alpha;Prothymosin alpha, N-terminally processed;Thymosin alpha	Ptma	12.254	9.18994	2		0.308105	0.748989	0.589043	28.5087	29.6325	5	4	27.7203	28.5836	29.9041	28.4638	27.8719	29.6244	30.3845	30.6456	27.8753	26.959
568	P26369	P26369	Splicing factor U2AF 65 kDa subunit	U2af2	53.516	9.48714	18		0.2792	0.892239	-0.121513	32.5362	32.4147	5	5	32.2585	32.637	32.4086	32.3352	33.0416	32.1879	32.1822	32.7031	32.6852	32.315
569	P26443	P26443	Glutamate dehydrogenase 1, mitochondrial	Glud1	61.336	8.45292	11		0.210672	0.903578	-0.128121	30.3397	30.2116	5	5	29.9415	29.8401	30.4734	30.8471	30.5963	30.7318	30.3297	30.1355	29.985	29.8759
571	P26516	P26516	26S proteasome non-ATPase regulatory subunit 7	Psmd7	36.539	9.07445	21		0.423532	0.785446	0.22863	31.0094	31.238	5	5	30.4169	30.6875	31.1894	31.4181	31.335	30.6886	31.3998	31.3368	31.55	31.2149
572	P26638	P26638	Serine--tRNA ligase, cytoplasmic	Sars	58.388	9.26017	29		0.0290036	0.994366	0.0105171	32.5645	32.575	5	5	32.955	32.3862	32.3908	32.6367	32.4538	32.464	32.5991	32.8115	32.5465	32.4541
573	P26645	P26645	Myristoylated alanine-rich C-kinase substrate	Marcks	29.661	9.29081	10		1.05415	0.381526	0.600422	31.2148	31.8152	5	5	30.8983	31.4426	32.0554	31.1052	30.5723	31.8092	32.328	31.9378	31.7789	31.222
574	P26883;Q9Z2I2	P26883	Peptidyl-prolyl cis-trans isomerase FKBP1A	Fkbp1a	11.922	10.0778	5		1.0227	0.434826	0.511428	31.8979	32.4093	5	5	31.6806	31.9753	32.1934	32.0182	31.6219	31.852	32.5868	33.1084	32.6655	31.8337
576	P27048;P63163	P27048;P63163	Small nuclear ribonucleoprotein-associated protein B;Small nuclear ribonucleoprotein-associated protein N	Snrpb;Snrpn	23.656	9.01887	4		0.868804	0.453409	0.562719	30.3845	30.9472	5	5	30.4855	30.8864	30.8921	29.4699	30.1885	31.4159	31.0068	31.0616	31.1041	30.1476
577	P27546	P27546	Microtubule-associated protein 4	Map4	117.43	8.02073	8		0.0258561	0.990144	0.0277164	29.4654	29.4931	5	5	28.8249	30.0549	29.92	28.9655	29.5617	29.0717	29.3589	30.5584	29.0631	29.4135
579	P27612	P27612	Phospholipase A-2-activating protein	Plaa	87.22	7.9379	10	+	4.16504	0.001	-3.1075	29.3924	NaN	5	0	28.8852	29.5192	30.466	28.8849	29.2066	26.5389	27.2343	25.8921	25.523	26.2361
580	P27641	P27641	X-ray repair cross-complementing protein 5	Xrcc5	83.056	7.8405	10		1.24979	0.204786	-1.06222	28.8777	28.4993	5	3	28.3622	28.9129	28.997	29.327	28.7896	27.2111	28.7876	28.1836	28.5267	26.3686
581	P27659	P27659	60S ribosomal protein L3	Rpl3	46.109	10.3204	42		0.40721	0.751324	-0.313568	35.5247	35.2111	5	5	35.673	35.8462	34.7677	35.3836	35.953	35.3491	34.5388	35.456	34.6767	36.0351
583	P27773	P27773	Protein disulfide-isomerase A3	Pdia3	56.678	9.96924	53		0.171079	0.910053	0.117932	35.1242	35.2422	5	5	34.612	34.7367	35.0378	35.4682	35.7666	34.6616	35.1996	35.4846	35.5784	35.2866
584	P28271	P28271	Cytoplasmic aconitate hydratase	Aco1	98.124	7.53076	6		0.121351	0.91846	-0.135583	27.5934	NaN	4	0	26.9773	27.7895	28.1652	27.134	27.285	28.443	26.5819	27.893	26.7023	27.0527
585	P28301	P28301	Protein-lysine 6-oxidase	Lox	46.7	9.01561	10		0.49157	0.708601	-0.320273	31.4634	31.1431	5	5	32.4077	31.1733	30.9285	31.7069	31.1007	31.2301	31.1768	30.6171	31.456	31.2356
586	P28352	P28352	DNA-(apurinic or apyrimidinic site) lyase;DNA-(apurinic or apyrimidinic site) lyase, mitochondrial	Apex1	35.49	8.87507	15		1.5358	0.47134	-0.329851	30.547	30.2172	5	5	30.5319	30.8238	30.686	30.4564	30.2372	30.2092	30.1905	30.0607	30.4934	30.1321
587	P28474;Q64437;P00329	P28474	Alcohol dehydrogenase class-3	Adh5	39.547	9.41707	22		0.293846	0.841149	0.219147	32.4986	32.7177	5	5	32.1434	32.0537	32.4337	32.9747	32.8874	32.1548	32.9178	33.3642	33.0671	32.0846
588	P28481	P28481	Collagen alpha-1(II) chain;Collagen alpha-1(II) chain;Chondrocalcin	Col2a1	141.97	10.0687	42		0.296629	0.875893	-0.152506	36.6916	36.5391	5	5	36.6265	36.3205	36.5288	37.2198	36.7624	36.3016	36.403	37.1521	36.5279	36.3109
590	P28653	P28653	Biglycan	Bgn	41.639	10.7201	32		0.877287	0.551965	0.365317	36.5727	36.938	5	5	36.4236	36.4321	37.0028	36.5543	36.4505	36.8568	37.0883	37.4822	36.9449	36.3178
591	P28654	P28654	Decorin	Dcn	39.809	9.92322	24		1.23548	0.435322	0.427168	34.1392	34.5663	5	5	34.1619	33.9934	34.241	34.2081	34.0914	34.1865	34.8814	35.1438	34.3151	34.3048
592	P28656	P28656	Nucleosome assembly protein 1-like 1	Nap1l1	45.345	9.14638	13		0.17285	0.904614	0.128214	31.007	31.1352	5	5	30.7515	30.9025	30.9925	31.6125	30.776	30.5426	31.2693	31.9923	31.0351	30.837
593	P28658	P28658	Ataxin-10	Atxn10	53.706	8.20909	13		0.091503	0.95919	-0.0611637	29.0306	28.9695	5	5	28.7369	29.473	29.4431	28.7044	28.7958	29.4134	28.9626	29.0132	28.3526	29.1056
594	P28659	P28659	CUGBP Elav-like family member 1	Celf1	52.107	8.87233	8		0.820791	0.583044	0.343743	30.3763	30.72	5	5	30.4586	29.7638	30.6449	30.6081	30.406	30.8459	30.9478	30.7263	30.9251	30.155
595	P28660	P28660	Nck-associated protein 1	Nckap1	128.78	7.37831	5		0.0793258	0.963456	-0.0591408	27.4038	27.3609	5	4	27.3694	27.7437	27.5335	27.2779	27.0948	28.0346	27.1073	27.28	26.5948	27.7068
598	P28740;Q922S8	P28740	Kinesin-like protein KIF2A	Kif2a	79.755	7.80511	7		0.264793	0.827191	-0.310104	28.0946	29.0352	5	1	27.967	28.507	28.3546	27.6346	28.0097	28.3974	26.275	27.7177	27.497	29.0352
599	P28798	P28798	Granulins;Acrogranin;Granulin-1;Granulin-2;Granulin-3;Granulin-4;Granulin-5;Granulin-6;Granulin-7	Grn	63.458	9.08973	8		1.00529	0.406624	0.579649	31.4056	31.9852	5	5	31.6176	31.5282	31.9516	31.5621	30.3683	32.0694	32.3735	32.1814	31.8064	31.4954
601	P29268	P29268	Connective tissue growth factor	Ctgf	37.824	8.70326	10		1.41801	0.114126	1.60328	29.3249	30.9282	5	5	29.1623	28.7682	29.7299	30.1283	28.8358	30.0131	32.0114	32.6352	30.3781	29.6031
602	P29341	P29341	Polyadenylate-binding protein 1	Pabpc1	70.67	9.23035	30		0.82097	0.496089	0.463383	32.6646	33.128	5	5	32.5953	32.8193	33.3085	31.8284	32.7715	32.9036	32.8622	33.373	33.662	32.8392
603	P29387	P29387	Guanine nucleotide-binding protein subunit beta-4	Gnb4	37.379	8.4405	14		1.04601	0.370439	0.638933	28.6068	29.2457	5	5	28.0663	28.0207	28.2439	29.3491	29.354	29.2626	29.3972	28.8345	29.5876	29.1468
604	P29416	P29416	Beta-hexosaminidase subunit alpha	Hexa	60.612	8.24107	6		1.42964	0.336427	-0.514568	29.1895	28.6749	5	5	29.1761	29.1129	28.8589	29.2418	29.5578	28.8944	28.6562	28.045	28.7176	29.0613
606	P29699;CON__P12763	P29699	Alpha-2-HS-glycoprotein	Ahsg	37.325	10.4809	16		1.2481	0.271808	0.752345	34.7073	35.4596	5	5	35.5664	35.0667	34.073	34.4051	34.4252	35.8612	35.1034	35.0254	36.0334	35.2746
607	P29758	P29758	Ornithine aminotransferase, mitochondrial	Oat	48.354	10.1384	37		0.118974	0.940174	0.0838638	35.1042	35.188	5	5	34.6771	34.5401	35.0469	35.721	35.5357	34.9063	35.2075	35.623	35.2712	34.932
608	P29788	P29788	Vitronectin	Vtn	54.848	8.11494	3	+	4.54025	0.000727273	2.20275	NaN	28.6641	0	5	26.7145	26.03	26.8239	26.8715	25.8669	29.179	28.4442	28.3876	28.8261	28.4837
611	P30285;Q99J95;O35495	P30285	Cyclin-dependent kinase 4	Cdk4	33.75	9.26663	14		1.02886	0.561026	0.314313	31.7724	32.0867	5	5	31.8985	31.6294	31.4002	32.0111	31.9228	31.7016	32.2501	32.1307	32.3976	31.9537
612	P30412	P30412	Peptidyl-prolyl cis-trans isomerase C	Ppic	22.794	8.96984	7		0.128222	0.904511	-0.231231	29.85	29.6187	5	5	30.388	31.1406	29.3112	28.7804	29.6297	28.7859	29.2187	29.8613	28.607	31.6208
613	P30416	P30416	Peptidyl-prolyl cis-trans isomerase FKBP4;Peptidyl-prolyl cis-trans isomerase FKBP4, N-terminally processed	Fkbp4	51.572	9.35199	34		0.314245	0.869116	0.154079	33.0217	33.1758	5	5	32.6338	32.7618	33.3856	33.2514	33.0759	32.6033	33.1577	33.3878	33.2325	33.4976
614	P30681	P30681	High mobility group protein B2	Hmgb2	24.162	9.79511	17		0.813113	0.420184	0.746749	31.7281	32.4749	5	5	31.2483	31.7919	33.3005	30.9602	31.3398	32.9048	32.5423	32.6404	32.6954	31.5916
615	P30999;REV__Q68FG3	P30999	Catenin delta-1	Ctnnd1	104.92	8.75791	32		1.10329	0.584811	0.27384	31.6574	31.9312	5	5	31.8602	31.6851	31.7742	31.4096	31.5578	31.6487	31.8105	32.0113	32.305	31.8807
616	P31001	P31001	Desmin	Des	53.497	9.88597	68		0.259645	0.863615	0.201449	34.6874	34.8888	5	5	35.6511	34.97	34.0081	34.8183	33.9894	35.0633	34.847	34.6261	34.9667	34.9411
617	P31230	P31230	Aminoacyl tRNA synthase complex-interacting multifunctional protein 1;Endothelial monocyte-activating polypeptide 2	Aimp1	33.997	9.08604	16		1.44385	0.266554	0.645519	30.9642	31.6097	5	5	30.9944	31.4978	31.1895	30.6386	30.5009	31.2743	31.7733	31.7686	32.1134	31.1193
619	P31324	P31324	cAMP-dependent protein kinase type II-beta regulatory subunit	Prkar2b	46.167	8.44489	14		0.0302217	0.991677	-0.0236084	29.7158	29.6922	5	5	29.3969	29.2018	29.6035	30.4374	29.9394	29.1777	29.8699	29.9833	29.9796	29.4504
621	P31725	P31725	Protein S100-A9	S100a9	13.049	8.13043	2		1.86548	0.0565053	1.55893	NaN	28.2035	0	4	26.9954	25.9305	28.0255	26.119	25.8954	29.2315	27.712	27.7871	28.0834	27.9464
622	P31750	P31750	RAC-alpha serine/threonine-protein kinase	Akt1	55.707	8.73775	15		0.580042	0.699613	0.281464	30.8192	31.1006	5	5	30.106	30.7653	31.4892	30.9579	30.7774	31.3845	31.1191	30.9894	31.0055	31.0045
623	P31938	P31938	Dual specificity mitogen-activated protein kinase kinase 1	Map2k1	43.474	9.20577	12		0.90747	0.644323	0.258499	31.8363	32.0948	5	5	31.6885	31.5264	31.8015	32.0504	32.1146	31.847	32.1957	32.1962	32.369	31.8661
624	P32020	P32020	Non-specific lipid-transfer protein	Scp2	59.125	8.12205	4		1.36358	0.128273	1.51781	28.6115	29.2559	2	5	27.7946	28.4762	28.7467	27.8551	25.8179	29.8669	28.8215	29.3083	30.1791	28.1038
625	P32067	P32067	Lupus La protein homolog	Ssb	47.756	8.53475	16		0.0616862	0.965557	0.0819057	29.6913	29.7732	5	5	28.9493	30.688	30.425	28.8011	29.5931	30.303	29.25	28.9328	30.3209	30.0593
626	P32233	P32233	Developmentally-regulated GTP-binding protein 1	Drg1	40.512	8.16259	7		0.299799	0.787467	-0.39116	28.4889	28.0977	5	5	27.7717	28.8583	28.1738	27.4741	30.1665	28.7606	27.4225	28.6477	28.1739	27.4839
627	P32883	P32883	GTPase KRas;GTPase KRas, N-terminally processed	Kras	21.656	8.62719	6		0.476237	0.791319	0.194566	28.8506	29.0451	5	5	28.5676	28.8514	29.1624	28.8553	28.8162	29.1308	28.8439	28.9216	29.637	28.6924
628	P32921	P32921	Tryptophan--tRNA ligase, cytoplasmic;T1-TrpRS;T2-TrpRS	Wars	54.357	8.67099	19		0.626018	0.774297	0.183471	30.5311	30.7146	5	5	30.5296	30.6288	30.2849	30.5619	30.6504	30.4544	30.5649	31.1509	30.5512	30.8515
629	P33434	P33434	72 kDa type IV collagenase;PEX	Mmp2	74.102	8.96383	24		0.330454	0.864455	-0.158847	31.9636	31.8047	5	5	31.8293	31.5176	31.9273	32.5165	32.0272	31.408	31.6872	32.1932	31.9321	31.8032
630	P33435	P33435	Collagenase 3	Mmp13	54.181	7.97098	11	+	2.44717	0.0172766	2.09252	NaN	29.0444	0	5	26.4646	26.4693	28.1484	26.4028	27.2744	29.9231	27.9605	28.3078	29.6563	29.3745
632	P34022	P34022	Ran-specific GTPase-activating protein	Ranbp1	23.596	8.99835	9		1.47909	0.12692	1.2518	29.2372	30.489	5	5	28.8144	29.5466	30.8574	28.2404	28.7273	30.291	30.5404	30.7755	30.8998	29.9385
634	P34884	P34884	Macrophage migration inhibitory factor	Mif	12.504	8.87441	6		1.0843	0.206268	1.48126	29.0934	29.4437	3	5	28.568	29.0438	29.6684	25.7724	26.7597	29.483	28.9445	29.8162	29.3295	29.6455
635	P35123	P35123	Ubiquitin carboxyl-terminal hydrolase 4	Usp4	108.34	7.85398	14		0.780951	0.470385	-0.614709	28.8052	28.1905	5	5	29.6777	28.8449	28.2267	28.2386	29.0379	27.8893	27.6291	27.7657	29.2579	28.4104
636	P35235	P35235	Tyrosine-protein phosphatase non-receptor type 11	Ptpn11	68.46	8.44756	21		0.921806	0.589497	-0.297972	30.5604	30.2624	5	5	30.5403	30.4724	30.4158	31.0349	30.3384	29.9944	30.3864	30.2384	30.0464	30.6463
637	P35278	P35278	Ras-related protein Rab-5C	Rab5c	23.412	8.56161	5		1.27885	0.177831	-1.22421	29.1466	29.0933	5	2	29.3165	29.4046	28.4966	29.1378	29.3774	29.0759	26.7665	29.1107	26.8568	27.8021
638	P35279;P61294;Q8BHD0	P35279;P61294	Ras-related protein Rab-6A;Ras-related protein Rab-6B	Rab6a;Rab6b	23.59	9.27926	7		1.15021	0.474694	-0.391242	31.6655	31.2743	5	5	31.9879	31.8847	31.6686	31.2212	31.5653	31.706	31.1168	30.9124	31.3173	31.3191
642	P35293	P35293	Ras-related protein Rab-18	Rab18	23.035	9.01149	7		0.337031	0.832699	-0.198923	30.6986	30.4997	5	5	31.2726	30.6508	30.955	30.3689	30.2457	31.1036	30.0741	30.2665	30.4951	30.5593
645	P35486;P35487	P35486	Pyruvate dehydrogenase E1 component subunit alpha, somatic form, mitochondrial	Pdha1	43.231	9.50137	25		0.266594	0.903826	0.0957237	32.9512	33.0469	5	5	33.3402	32.9997	32.785	33.0863	32.5447	33.0706	32.9627	33.0528	32.879	33.2695
646	P35550;Q80WS3	P35550	rRNA 2-O-methyltransferase fibrillarin	Fbl	34.306	9.53835	13		0.101316	0.949746	-0.0842186	32.9636	32.8794	5	5	32.8258	33.4192	32.7635	32.3582	33.4515	32.7439	32.2498	32.7965	33.6598	32.947
647	P35564	P35564	Calnexin	Canx	67.277	9.41812	31		0.705785	0.585958	-0.381736	33.3582	32.9765	5	5	33.4304	33.7519	33.4203	33.1423	33.0462	33.2657	33.0919	32.8327	32.1351	33.5572
648	P35569	P35569	Insulin receptor substrate 1	Irs1	130.72	7.98943	11		0.297913	0.820178	-0.262639	29.4684	29.2058	5	5	29.3307	29.9553	30.1371	28.3365	29.5825	29.5984	29.3472	29.5409	29.0466	28.4959
649	P35585	P35585	AP-1 complex subunit mu-1	Ap1m1	48.542	8.16409	6		0.459607	0.656594	0.488169	28.6889	28.7615	4	5	28.8473	28.7932	28.9902	28.1249	26.6112	29.444	28.7118	28.6957	28.1287	28.8273
651	P35700	P35700	Peroxiredoxin-1	Prdx1	22.176	10.2342	25		0.91061	0.649313	0.255001	34.8773	35.1323	5	5	34.5837	34.6865	35.0545	35.0875	34.974	34.8348	35.2468	35.4595	35.1327	34.9874
652	P35710	P35710	Transcription factor SOX-5	Sox5	84.089	7.83296	7		0.0870594	0.954642	-0.0816528	28.3927	28.3111	5	5	28.3668	29.1044	28.9831	27.6544	27.855	28.5088	28.6041	28.7048	27.9235	27.8143
654	P35821	P35821	Tyrosine-protein phosphatase non-receptor type 1	Ptpn1	49.593	8.50581	9		0.623513	0.793861	0.165458	29.6187	29.7842	5	5	29.4309	29.6497	29.2687	29.8487	29.8956	29.7552	29.8075	29.9117	29.8311	29.6155
655	P35922	P35922	Fragile X mental retardation protein 1 homolog	Fmr1	68.988	8.68531	14		0.496407	0.770935	-0.228722	30.9779	30.7492	5	5	30.7915	31.1208	31.0528	30.8675	31.0569	30.4684	30.358	30.5168	30.9254	31.4772
656	P35979	P35979	60S ribosomal protein L12	Rpl12	17.804	9.62362	8		0.694888	0.474662	0.727745	31.706	32.4337	5	5	31.5828	32.2863	32.6367	29.9855	32.0387	32.1132	32.2653	32.6273	33.281	31.882
657	P35980	P35980	60S ribosomal protein L18	Rpl18	21.644	9.97212	14		0.0993672	0.940991	0.110016	32.6596	32.7696	5	5	32.9486	33.6811	32.1472	31.6496	32.8714	32.6889	32.4151	32.7998	32.3801	33.5641
658	P36536	P36536	GTP-binding protein SAR1a	Sar1a	22.371	9.19106	7		0.176144	0.897691	0.176888	30.6611	30.838	5	5	30.9941	31.2152	31.3869	29.9801	29.7292	31.5666	30.8647	30.5318	30.3625	30.8643
660	P36916	P36916	Guanine nucleotide-binding protein-like 1	Gnl1	68.77	7.74635	6		0.425948	0.76211	-0.279362	27.8756	27.6092	4	3	27.5853	28.1934	27.6422	26.9339	28.0814	27.7389	27.2526	26.959	27.0946	27.9943
661	P36993;REV__P59279	P36993	Protein phosphatase 1B	Ppm1b	42.795	8.72529	9		0.053767	0.978879	-0.0405273	30.5078	30.4672	5	5	30.2674	30.1228	30.2189	31.3223	30.6073	30.4272	30.5949	30.5688	30.835	29.9101
662	P37040	P37040	NADPH--cytochrome P450 reductase	Por	77.043	8.26354	13		0.439322	0.670965	-0.489256	29.7291	29.2398	5	5	29.104	29.8326	29.6307	29.8867	30.1914	29.58	29.6114	29.634	27.3659	30.0077
663	P37889	P37889	Fibulin-2	Fbln2	131.83	8.91108	26		0.696307	0.71855	0.225922	32.1535	32.3794	5	5	32.1863	32.4047	32.0453	32.3709	31.7601	32.6283	32.4655	31.9882	32.2968	32.5182
664	P37913	P37913	DNA ligase 1	Lig1	102.29	7.53436	13		0.120527	0.925801	0.118803	27.463	27.5818	5	5	27.8942	26.6874	27.8831	27.4647	27.3854	27.321	26.524	27.9522	27.9449	28.1668
665	P38060;Q8JZS7	P38060	Hydroxymethylglutaryl-CoA lyase, mitochondrial	Hmgcl	34.238	8.85946	10		0.649459	0.521194	0.588831	30.3507	30.9395	5	5	29.4541	29.8112	30.4012	31.1885	30.8985	30.8616	31.3297	31.566	31.1425	29.7979
666	P38647	P38647	Stress-70 protein, mitochondrial	Hspa9	73.46	9.57647	46		0.596004	0.77248	0.191733	34.0512	34.2429	5	5	34.2787	34.0304	33.8741	34.1865	33.8863	33.7552	34.2588	34.5307	34.2381	34.4319
667	P39053	P39053	Dynamin-1	Dnm1	97.802	9.13997	39		0.695067	0.893095	-0.081871	32.9588	32.8769	5	5	32.9859	32.9238	33.0223	32.9304	32.9317	33.0899	32.8293	32.7638	32.8508	32.8508
668	P39054	P39054	Dynamin-2	Dnm2	98.144	8.36071	24		0.377531	0.86608	-0.139561	30.2989	30.1594	5	5	30.6458	30.4198	30.1059	30.1355	30.1877	30.4604	30.0201	29.7458	30.3664	30.2042
669	P39061	P39061	Collagen alpha-1(XVIII) chain;Endostatin	Col18a1	182.17	7.89693	8		0.0315757	0.991362	0.0219578	29.4157	29.4376	5	5	30.0411	29.1445	29.1126	29.4241	29.3561	29.6602	29.418	29.0734	29.973	29.0635
671	P39447	P39447	Tight junction protein ZO-1	Tjp1	194.74	7.69584	16		0.279446	0.88232	0.134599	29.1397	29.2743	5	5	29.1402	29.0367	29.4108	28.5648	29.5462	29.3612	29.1705	29.0895	29.6664	29.084
673	P39749	P39749	Flap endonuclease 1	Fen1	42.314	8.54774	6		1.69547	0.112943	1.11734	29.1313	30.2487	5	5	28.3496	29.1951	30.0933	28.6439	29.3747	30.0788	30.1051	30.5872	30.938	29.5342
675	P40124	P40124	Adenylyl cyclase-associated protein 1	Cap1	51.564	9.80672	37		0.174501	0.923762	-0.0799416	34.3986	34.3186	5	5	34.1998	33.9405	34.27	34.9136	34.6689	34.1299	34.392	34.3525	34.3604	34.3584
676	P40142	P40142	Transketolase	Tkt	67.63	9.05945	27		0.0184425	0.993595	-0.0136936	31.9339	31.9202	5	5	31.4706	31.4566	31.8561	32.2235	32.6625	31.6129	31.8544	31.909	32.2858	31.9387
678	P40240	P40240	CD9 antigen	Cd9	25.258	9.33832	5		0.445804	0.74131	-0.302269	30.647	30.3447	5	5	31.1476	30.7826	30.5279	30.2241	30.5524	31.0377	29.9538	29.5224	30.6676	30.5419
679	P41105	P41105	60S ribosomal protein L28	Rpl28	15.733	9.69099	15		0.294974	0.792834	-0.357406	32.0883	31.7309	5	5	32.3445	32.9032	31.2489	31.3868	32.5581	31.8757	31.1385	30.7363	31.8404	33.0637
680	P41241;P41242	P41241	Tyrosine-protein kinase CSK	Csk	50.716	8.43941	12		0.2509	0.887513	0.140688	29.8798	30.0205	5	5	29.2146	29.6294	30.0603	30.121	30.3735	29.6405	30.224	30.0814	30.2219	29.9344
683	P42128;Q3UCQ1	P42128	Forkhead box protein K1	Foxk1	74.919	8.11995	9		1.26676	0.27285	0.74439	28.6543	29.3987	5	5	27.9759	28.8271	29.2428	28.8191	28.4067	29.2513	29.6019	30.2642	28.8451	29.0311
684	P42208	P42208	Septin-2	37500	41.525	9.68553	33		0.0267451	0.99409	-0.0115845	33.7147	33.7032	5	5	33.7708	33.584	33.6659	34.0338	33.5193	33.2695	33.7062	33.962	33.8802	33.698
686	P42227	P42227	Signal transducer and activator of transcription 3	Stat3	88.053	8.69479	16		0.265288	0.881457	0.144494	31.0757	31.2202	5	5	31.1522	31.3102	30.9234	30.7576	31.2353	31.8267	30.9321	30.6756	31.1744	31.4923
687	P42232	P42232	Signal transducer and activator of transcription 5B	Stat5b	90.001	7.77283	6		0.758022	0.425183	0.847336	27.9125	27.8453	2	5	26.8109	26.5307	25.8231	27.959	27.866	27.4731	27.2799	26.9082	28.9614	28.6039
689	P42669;Q8R4E6	P42669	Transcriptional activator protein Pur-alpha	Pura	34.883	9.07769	9		0.89622	0.475803	0.489757	29.8222	30.3119	5	5	29.9863	30.3307	30.2756	29.6535	28.8648	30.0772	30.1422	30.5335	30.2185	30.5883
690	P42932	P42932	T-complex protein 1 subunit theta	Cct8	59.555	9.688	40		0.0310252	0.989583	0.0162895	34.4187	34.435	5	5	34.014	34.1566	34.4705	34.6195	34.8331	34.183	34.4016	34.3086	34.8039	34.4779
691	P43024	P43024	Cytochrome c oxidase subunit 6A1, mitochondrial	Cox6a1	12.352	9.5918	3		1.06289	0.293199	0.86815	30.7641	31.6322	5	5	30.7696	31.5894	31.1861	30.4864	29.7888	30.8842	32.0787	32.6453	31.167	31.386
692	P43025	P43025	Tetranectin	Clec3b	22.257	8.40883	5		1.06512	0.240459	1.15844	27.0506	28.2091	5	5	26.7036	25.5876	28.0059	27.9957	26.9604	27.5897	28.0826	29.4926	28.5496	27.3309
693	P43247	P43247	DNA mismatch repair protein Msh2	Msh2	104.15	8.21498	11		0.598486	0.76434	0.203138	29.7028	29.9059	5	5	29.6962	29.7908	29.7853	29.5766	29.6651	30.1166	29.6334	29.4805	29.9359	30.3633
694	P43274	P43274	Histone H1.4	Hist1h1e	21.977	10.1102	15		0.29607	0.802859	-0.308009	33.6803	33.3723	5	5	33.4004	34.204	32.7586	33.6059	34.4327	33.3705	32.8701	32.4997	33.7655	34.3558
695	P43275	P43275	Histone H1.1	Hist1h1a	21.785	10.1233	15		0.0906011	0.936203	-0.151128	33.4072	33.2561	5	5	33.8515	33.9976	31.8697	33.135	34.1824	33.756	33.0707	32.6607	32.1177	34.6755
696	P43276	P43276	Histone H1.5	Hist1h1b	22.576	10.364	16		0.0507592	0.971319	-0.070903	34.403	34.3321	5	5	34.4266	35.0486	32.9536	34.1959	35.3904	34.2	34.14	33.6027	34.5216	35.1963
697	P43277	P43277	Histone H1.3	Hist1h1d	22.099	9.67518	17		0.129029	0.913886	0.161581	32.0516	32.2132	5	5	31.2605	32.0285	31.4113	32.2029	33.3549	32.0657	31.766	31.4343	32.9078	32.8923
698	P43406	P43406	Integrin alpha-V;Integrin alpha-V heavy chain;Integrin alpha-V light chain	Itgav	115.36	8.49999	18		0.417073	0.864536	-0.13413	31.1465	31.0124	5	5	30.9124	30.8625	31.0534	31.5716	31.3327	31.0523	31.1964	31.0166	30.8772	30.9194
699	P45376	P45376	Aldose reductase	Akr1b1	35.732	8.96457	12		0.232512	0.882483	0.160667	31.0818	31.2425	5	5	31.0471	30.6014	31.4603	30.7316	31.5687	31.1504	31.3197	31.1722	31.9334	30.6367
700	P45377;P21300	P45377	Aldose reductase-related protein 2	Akr1b8	36.12	8.17173	3	+	4.18642	0.0016	2.13262	NaN	28.6943	0	5	26.9385	26.439	26.782	26.8075	25.8412	28.6179	28.5928	28.3082	29.466	28.4865
702	P45591	P45591	Cofilin-2	Cfl2	18.709	8.86092	10		0.141342	0.904075	0.187696	29.7228	29.9105	5	5	30.3544	30.2456	29.8666	29.5465	28.6009	30.649	30.1667	30.3066	28.3559	30.0742
703	P45878	P45878	Peptidyl-prolyl cis-trans isomerase FKBP2	Fkbp2	15.344	8.86976	5		0.130761	0.903324	0.248175	28.9655	29.5689	5	4	29.8942	29.8587	30.0421	27.8697	27.163	29.8889	28.9386	29.9417	29.5064	27.793
704	P45952	P45952	Medium-chain specific acyl-CoA dehydrogenase, mitochondrial	Acadm	46.481	9.09635	19		1.73444	0.34048	0.4405	31.4421	31.8826	5	5	31.4247	31.3855	31.4423	31.7289	31.2289	31.7564	32.0889	32.1607	31.943	31.4639
705	P46061	P46061	Ran GTPase-activating protein 1	Rangap1	63.53	9.06393	27		0.287536	0.903589	0.0967346	31.9685	32.0653	5	5	31.8304	31.7577	31.8592	32.0893	32.3061	31.8026	32.0579	31.9417	32.4018	32.1223
707	P46460	P46460	Vesicle-fusing ATPase	Nsf	82.613	8.82086	28		0.00302747	0.999718	0.000600052	31.8718	31.8724	5	5	31.7507	31.8509	31.9904	31.7725	31.9947	31.7681	31.8024	32.0079	31.9028	31.8809
708	P46467;Q8BPY9	P46467	Vacuolar protein sorting-associated protein 4B	Vps4b	49.419	8.69408	13		1.43474	0.406618	0.41532	30.4793	30.8946	5	5	30.3661	30.5243	30.7899	30.5027	30.2134	30.5084	31.1138	31.2783	30.7885	30.7838
709	P46471	P46471	26S protease regulatory subunit 7	Psmc2	48.647	9.23254	33		0.343985	0.841234	0.184175	32.4012	32.5854	5	5	32.509	32.5867	32.7108	32.3543	31.8454	32.5256	32.3932	32.0835	33.1361	32.7887
710	P46638;P62492;Q9WTL2	P46638;P62492	Ras-related protein Rab-11B;Ras-related protein Rab-11A	Rab11b;Rab11a	24.489	9.32496	12		0.114882	0.970968	-0.0301636	31.9754	31.9453	5	5	31.8555	32.0527	31.8832	32.1071	31.9788	32.1035	32.0237	31.9168	32.0588	31.6235
711	P46664	P46664	Adenylosuccinate synthetase isozyme 2	Adss	50.02	8.43624	17		0.00105997	0.999828	0.00090065	29.2571	29.258	5	5	28.7001	28.781	29.4707	29.6735	29.6601	28.678	29.0906	29.4065	29.2846	29.8303
714	P46735	P46735	Unconventional myosin-Ib	Myo1b	128.56	8.11982	13		0.621719	0.474788	-0.948075	29.8012	28.8532	5	5	29.5045	31.271	29.7843	28.7137	29.7326	30.5936	27.623	27.4049	28.7808	29.8635
715	P46737;Q7M757	P46737	Lys-63-specific deubiquitinase BRCC36	Brcc3	33.34	8.26002	5		0.779552	0.6131	-0.312416	28.6179	28.3055	5	5	28.9036	28.5161	28.5749	28.3284	28.7666	28.3945	28.0111	28.1573	28.963	28.0017
716	P46935	P46935	E3 ubiquitin-protein ligase NEDD4	Nedd4	102.71	9.2318	37		1.02801	0.472053	-0.43747	33.09	32.6526	5	5	33.2618	33.4487	33.4728	32.4583	32.8086	33.1051	32.5697	32.5174	32.4398	32.6309
717	P46978	P46978	Dolichyl-diphosphooligosaccharide--protein glycosyltransferase subunit STT3A	Stt3a	80.597	8.539	8		0.13125	0.902118	-0.300625	29.7273	29.4267	5	5	30.2769	31.0279	30.087	27.9813	29.2636	31.2354	28.0054	28.0995	28.8177	30.9756
718	P47199	P47199	Quinone oxidoreductase	Cryz	35.268	8.47048	5		0.0118471	0.994295	0.00992661	29.2847	29.2947	5	5	29.6294	29.5981	29.6005	28.9967	28.5989	29.1104	29.2796	29.5343	28.6981	29.8509
720	P47738;Q62148;P24549;O35945;Q9JHW9;Q9CZS1	P47738	Aldehyde dehydrogenase, mitochondrial	Aldh2	56.537	8.89708	21		0.0994666	0.958637	-0.0637157	31.2952	31.2315	5	5	31.0314	31.0067	31.1274	31.7363	31.5743	30.9808	31.7128	31.402	30.6628	31.399
721	P47740;P47739	P47740	Fatty aldehyde dehydrogenase	Aldh3a2	53.97	8.51962	4		0.0552604	0.963208	0.135119	29.86	30.0546	4	4	29.6634	29.7777	29.6821	27.0344	30.3168	30.6603	29.6525	30.2163	29.6892	26.9318
722	P47753	P47753	F-actin-capping protein subunit alpha-1	Capza1	32.939	9.53666	14		0.649502	0.700297	-0.254283	32.6106	32.3563	5	5	32.6309	32.5366	32.4228	33.0321	32.4308	31.8313	32.3939	32.6307	32.7066	32.2192
723	P47754	P47754	F-actin-capping protein subunit alpha-2	Capza2	32.967	9.48054	12		0.0943483	0.9694	0.0401562	32.2704	32.3105	5	5	32.2652	31.9593	32.0847	32.7116	32.331	32.3427	32.2053	32.1968	32.6506	32.1573
724	P47757	P47757	F-actin-capping protein subunit beta	Capzb	31.345	9.63461	17		0.34139	0.876099	0.137016	33.0478	33.1848	5	5	32.9186	33.0863	32.5915	33.4672	33.1755	33.2685	32.9763	32.9449	33.4614	33.2731
725	P47758	P47758	Signal recognition particle receptor subunit beta	Srprb	29.579	8.73561	13		0.114733	0.942438	-0.0830441	30.1103	30.0272	5	5	29.5879	29.9844	30.3479	29.9904	30.6408	30.2786	30.0333	29.3692	30.5887	29.8663
726	P47809	P47809	Dual specificity mitogen-activated protein kinase kinase 4	Map2k4	44.113	8.1724	3		0.563428	0.667969	0.337804	28.4508	28.7886	5	5	28.4423	28.4799	28.6293	27.9634	28.739	29.3665	28.2299	28.2059	28.7951	29.3454
728	P47856	P47856	Glutamine--fructose-6-phosphate aminotransferase [isomerizing] 1	Gfpt1	78.538	9.34686	35		0.501524	0.762815	-0.233852	33.5759	33.342	5	5	33.327	33.5749	33.9741	33.2124	33.7911	33.782	33.0995	32.8669	33.3456	33.6161
729	P47857	P47857	ATP-dependent 6-phosphofructokinase, muscle type	Pfkm	85.268	9.26245	29		0.296624	0.888321	0.122271	32.7717	32.8939	5	5	33.047	32.8114	32.6877	32.3621	32.95	33.1843	33.0243	32.7089	32.4872	33.0648
730	P47911	P47911	60S ribosomal protein L6	Rpl6	33.509	10.2304	27		0.203957	0.879959	-0.219643	34.7058	34.4861	5	5	35.1605	35.5212	33.9717	33.8579	35.0176	34.9287	33.7328	34.1554	34.3404	35.2734
731	P47915	P47915	60S ribosomal protein L29	Rpl29	17.587	9.63183	5		0.0169887	0.992359	-0.0319077	31.0088	30.9769	5	5	31.4873	32.3304	30.8248	29.1159	31.2856	31.6545	30.5713	29.7672	31.6359	31.2556
732	P47955	P47955	60S acidic ribosomal protein P1	Rplp1	11.475	9.28416	4		0.754476	0.472104	0.637606	29.1397	29.7773	5	5	28.765	29.2197	29.3375	29.4307	28.9454	29.1916	30.2749	30.8293	30.0762	28.5144
733	P47962	P47962	60S ribosomal protein L5	Rpl5	34.4	10.4857	25		0.211402	0.910185	-0.100008	35.228	35.128	5	5	35.2958	35.4982	35.1898	34.8574	35.2987	35.3685	34.5398	35.0987	35.1902	35.4428
734	P47963	P47963	60S ribosomal protein L13	Rpl13	24.305	9.60964	17		0.27866	0.832561	0.267527	31.8024	32.0699	5	5	32.3453	32.6969	31.6019	30.7317	31.6362	32.7741	31.5333	31.689	32.1389	32.2143
735	P47964	P47964	60S ribosomal protein L36	Rpl36	12.215	9.53655	6		0.25661	0.815197	-0.37807	30.0231	29.6451	5	5	30.7533	31.3144	30.0809	28.1971	29.77	30.4259	29.0742	29.0165	29.3706	30.3381
737	P48036	P48036	Annexin A5	Anxa5	35.752	9.66566	25		0.151624	0.914543	-0.119917	33.7589	33.639	5	5	33.529	33.4619	33.2594	34.0563	34.4878	33.1999	33.5174	33.42	34.4174	33.6401
740	P48453;P48455	P48453;P48455	Serine/threonine-protein phosphatase 2B catalytic subunit beta isoform;Serine/threonine-protein phosphatase 2B catalytic subunit gamma isoform	Ppp3cb;Ppp3cc	59.173	7.85009	7		0.907685	0.397594	-0.69224	28.0317	NaN	5	0	29.0665	28.2811	27.7657	27.6441	27.4013	28.2979	27.2574	27.3782	27.1479	26.6161
741	P48678	P48678	Prelamin-A/C;Lamin-A/C	Lmna	74.237	10.5559	101		0.0958362	0.971307	0.0318214	37.5181	37.5499	5	5	37.5189	37.297	37.3989	37.8676	37.5082	37.4237	37.749	37.7138	37.4841	37.379
743	P48758;Q8K354	P48758	Carbonyl reductase [NADPH] 1	Cbr1	30.641	8.53089	11		0.839387	0.407736	0.756284	29.0699	29.8262	5	5	28.3893	28.9287	29.7377	28.3016	29.9921	29.0773	29.7073	29.8803	30.9751	29.4909
745	P48774	P48774	Glutathione S-transferase Mu 5	Gstm5	26.635	8.69269	9		0.0236982	0.990404	-0.0206928	29.7984	29.7777	5	5	29.8345	30.1499	29.8811	29.5622	29.5644	30.2616	29.9683	28.8145	29.5152	30.3289
746	P48962	P48962	ADP/ATP translocase 1	Slc25a4	32.904	9.86021	26		0.0559905	0.977968	0.0422707	34.0654	34.1077	5	5	34.2349	34.4307	34.1538	33.5185	33.9891	34.6595	34.1059	33.9733	33.3689	34.4306
747	P49138	P49138	MAP kinase-activated protein kinase 2	Mapkapk2	44.049	7.984	3		0.128534	0.934193	0.0853878	27.8404	27.9258	5	5	27.9271	27.7209	27.9756	27.66	27.9186	28.6798	28.1102	27.7431	27.9181	27.178
748	P49312	P49312	Heterogeneous nuclear ribonucleoprotein A1;Heterogeneous nuclear ribonucleoprotein A1, N-terminally processed	Hnrnpa1	34.196	9.77073	23		0.124353	0.939844	-0.0796158	33.7351	33.6555	5	5	33.3945	33.2396	34.1299	33.7547	34.1568	33.4337	33.5441	34.1758	33.3072	33.8167
749	P49442	P49442	Inositol polyphosphate 1-phosphatase	Inpp1	43.346	8.57893	9		0.940374	0.551435	-0.346164	29.7338	29.3876	5	5	30.1377	29.7815	29.3934	29.5913	29.765	28.8943	29.2569	29.6447	29.3857	29.7564
750	P49443	P49443	Protein phosphatase 1A	Ppm1a	42.432	8.63258	9		0.405076	0.834721	0.167503	30.163	30.3305	5	5	30.0105	30.0293	30.0219	30.6491	30.1042	30.0409	30.4899	30.7226	30.4141	29.9852
751	P49586;Q811Q9	P49586	Choline-phosphate cytidylyltransferase A	Pcyt1a	41.666	8.67997	16		1.32	0.476656	0.347076	30.3026	30.6497	5	5	30.2785	30.1875	30.5846	30.3305	30.132	30.3284	30.7413	31.0433	30.7075	30.428
752	P49615	P49615	Cyclin-dependent-like kinase 5	Cdk5	33.288	8.0244	8		0.801779	0.36626	-1.09594	28.5281	NaN	4	0	29.2455	28.9634	27.6294	26.1489	28.274	27.6863	27.2883	27.7428	26.6728	25.3913
753	P49717	P49717	DNA replication licensing factor MCM4	Mcm4	96.735	9.2304	31		0.189501	0.941404	-0.0583611	33.1575	33.0991	5	5	33.0675	33.3225	33.3606	32.773	33.2636	32.9238	33.0972	33.1642	33.0479	33.2623
754	P49718	P49718	DNA replication licensing factor MCM5	Mcm5	82.406	8.96879	31		0.121719	0.941457	-0.0821926	32.2046	32.1224	5	5	32.0384	32.4385	32.4603	31.4431	32.6427	32.1686	31.6608	31.9979	32.4456	32.3392
755	P49722	P49722	Proteasome subunit alpha type-2	Psma2	25.926	8.21277	6		0.0641502	0.959266	0.10146	28.4642	28.1578	4	5	26.425	27.8838	27.6395	29.1881	29.1453	27.821	28.5431	28.895	27.828	27.7018
757	P49817	P49817	Caveolin-1	Cav1	20.538	9.42495	7		0.250289	0.880795	0.159136	31.5518	31.7109	5	5	31.8341	31.987	30.9955	31.0931	31.8492	32.0917	31.7002	31.1685	31.6352	31.9589
758	P49919	P49919	Cyclin-dependent kinase inhibitor 1C	Cdkn1c	37.371	8.00792	2		0.0609018	0.969639	0.067252	NaN	27.4662	0	4	26.9811	27.6299	26.0368	27.8773	27.3807	26.3773	27.3702	27.388	27.3636	27.743
759	P49962	P49962	Signal recognition particle 9 kDa protein	Srp9	10.194	8.38559	4		0.403823	0.687887	0.528939	27.8488	27.8307	3	5	28.0711	27.8817	27.4453	28.0302	25.0805	27.4813	27.9089	28.3948	27.7608	27.6076
760	P50096	P50096	Inosine-5-monophosphate dehydrogenase 1	Impdh1	55.278	7.57774	9		0.0165774	0.992369	0.0305233	26.1839	NaN	4	0	25.3047	28.5517	25.7459	26.5761	27.1087	26.4102	25.8371	26.786	26.9405	27.466
763	P50396	P50396	Rab GDP dissociation inhibitor alpha	Gdi1	50.521	8.23807	11		0.175597	0.901954	0.149173	27.22	NaN	5	0	27.8181	27.2155	26.7964	27.1751	27.0948	26.4953	27.5918	28.1259	26.9347	27.698
764	P50431	P50431	Serine hydroxymethyltransferase, cytosolic	Shmt1	52.6	8.31067	10		0.0502232	0.981986	-0.0338551	29.4522	29.4183	5	5	28.8653	29.1696	29.4518	29.8884	29.886	29.1031	29.7875	29.4259	29.6121	29.1631
765	P50462	P50462	Cysteine and glycine-rich protein 3	Csrp3	20.895	9.22559	9		1.32003	0.27229	0.701516	30.61	31.3116	5	5	31.5128	30.6116	29.966	30.6074	30.3525	31.9172	31.027	31.2998	31.0707	31.2431
766	P50516	P50516	V-type proton ATPase catalytic subunit A	Atp6v1a	68.325	8.86618	29		0.0632108	0.980403	-0.0295437	31.6436	31.614	5	5	31.609	31.5025	31.4164	32.0987	31.5912	31.409	31.5759	31.4318	31.5892	32.0642
767	P50543	P50543	Protein S100-A11	S100a11	11.083	8.11501	3		2.22984	0.0965484	0.859798	NaN	27.372	0	4	26.8124	26.5038	26.2879	27.0217	26.5162	27.0963	27.4225	27.9109	27.0585	27.9528
768	P50544	P50544	Very long-chain specific acyl-CoA dehydrogenase, mitochondrial	Acadvl	70.875	8.52431	15		0.712084	0.645179	0.307167	30.5493	30.8564	5	5	30.5865	30.2607	30.5739	30.3989	30.9265	31.0125	30.5202	30.4018	31.4414	30.9063
769	P50580	P50580	Proliferation-associated protein 2G4	Pa2g4	43.698	9.71601	37		0.223827	0.919863	0.0755249	33.7316	33.8071	5	5	33.41	33.4651	34.0976	33.8479	33.8375	33.8437	33.6893	33.9607	33.7361	33.806
770	P50608	P50608	Fibromodulin	Fmod	43.054	10.71	25		0.463985	0.769434	0.241317	36.0754	36.3167	5	5	35.9452	35.6476	36.1198	36.551	36.1132	35.8369	36.4161	36.8669	36.5167	35.9467
771	P51150	P51150	Ras-related protein Rab-7a	Rab7a	23.489	9.07646	13		0.432795	0.864061	0.131608	30.9558	31.0874	5	5	31.0866	31.0899	30.6923	30.7831	31.1269	31.0645	31.0664	30.934	31.4817	30.8902
772	P51174	P51174	Long-chain specific acyl-CoA dehydrogenase, mitochondrial	Acadl	47.907	9.73173	20		1.70915	0.476826	0.29271	33.5556	33.8483	5	5	33.6223	33.4567	33.3164	33.7575	33.6248	33.8777	33.711	33.7661	34.0857	33.8008
773	P51410	P51410	60S ribosomal protein L9	Rpl9	21.881	9.78286	14		0.332369	0.783509	-0.328712	32.454	32.1252	5	5	32.2811	33.1273	32.2702	31.4717	33.1194	32.2122	31.3927	31.5863	32.3904	33.0446
775	P51655	P51655	Glypican-4;Secreted glypican-4	Gpc4	62.586	7.72337	4		1.59704	0.112482	-1.24428	27.819	NaN	5	0	28.0702	28.0813	27.916	27.5378	27.4898	25.4166	27.17	25.6131	27.3621	27.3119
776	P51660	P51660	Peroxisomal multifunctional enzyme type 2;(3R)-hydroxyacyl-CoA dehydrogenase;Enoyl-CoA hydratase 2	Hsd17b4	79.481	8.41394	16		0.663135	0.700837	0.249822	30.114	30.3639	5	5	29.9489	30.1783	30.0798	29.9237	30.4395	29.9901	30.1361	30.1913	30.7447	30.757
777	P51807	P51807	Dynein light chain Tctex-type 1	Dynlt1	12.483	8.97244	3		0.0997716	0.959716	-0.0537788	29.5018	29.448	5	5	29.0004	29.218	29.4622	29.7482	30.0802	29.395	29.2819	29.6391	29.4205	29.5036
781	P51881;Q3V132	P51881	ADP/ATP translocase 2;ADP/ATP translocase 2, N-terminally processed	Slc25a5	32.931	9.2537	25		0.256596	0.828148	-0.32939	32.0141	31.6847	5	5	32.2835	32.4654	32.7689	30.9002	31.6527	33.0176	31.3009	31.5743	30.4973	32.0334
782	P51885	P51885	Lumican	Lum	38.265	9.81981	16		1.57796	0.212943	0.703777	33.3661	34.0699	5	5	33.2939	33.411	33.9512	33.2389	32.9355	33.5955	34.3586	34.351	34.4694	33.5749
783	P51942	P51942	Cartilage matrix protein	Matn1	54.421	11.1385	65		0.39142	0.849287	0.156962	38.6725	38.8294	5	5	38.4084	38.3729	38.6794	38.8463	39.0554	38.5367	38.9479	39.1788	38.9251	38.5587
784	P52293	P52293	Importin subunit alpha-1	Kpna2	57.927	7.95045	7		0.192435	0.913719	-0.0944931	27.9744	27.8799	5	5	28.1747	27.7	27.9309	27.7903	28.2763	28.2026	27.8531	27.5464	28.2902	27.5075
785	P52431	P52431	DNA polymerase delta catalytic subunit	Pold1	123.79	8.08547	17		1.16477	0.441092	0.429038	29.6073	30.0363	5	5	29.0999	29.5006	29.9306	29.4296	30.0756	30.2853	29.895	29.9489	30.2681	29.7842
787	P52479	P52479	Ubiquitin carboxyl-terminal hydrolase 10	Usp10	87.021	7.30322	6		0.235014	0.878558	-0.178202	26.4625	NaN	4	0	26.5882	26.3173	27.4317	26.6882	26.2562	26.33	25.7724	27.0019	26.9597	26.3266
788	P52480;P53657	P52480	Pyruvate kinase PKM	Pkm	57.844	10.2772	59		0.0922337	0.970338	-0.0337532	36.1813	36.1475	5	5	36.4584	36.0011	36.1577	35.8569	36.4322	36.0779	35.95	36.1603	36.3431	36.2063
789	P52503	P52503	NADH dehydrogenase [ubiquinone] iron-sulfur protein 6, mitochondrial	Ndufs6	13.02	8.78871	5		1.1664	0.189191	1.37954	28.7818	29.6291	4	5	28.4301	28.9032	29.6054	28.1885	26.1206	29.7704	29.872	30.1062	29.9265	28.4704
790	P52825	P52825	Carnitine O-palmitoyltransferase 2, mitochondrial	Cpt2	73.98	8.62817	16		0.784952	0.656206	0.264735	30.7471	31.0119	5	5	31.2006	30.5683	30.8075	30.548	30.6112	31.2145	31.3383	31.0262	30.7051	30.7752
791	P52875	P52875	Transmembrane protein 165	Tmem165	34.79	8.71497	5		0.047672	0.969323	-0.179841	28.6383	28.4584	5	5	29.8572	30.6222	29.651	26.5187	26.5422	31.3967	26.1543	26.2578	29.5672	28.9161
792	P52927	P52927	High mobility group protein HMGI-C	Hmga2	11.819	9.20407	2		1.32198	0.108301	-2.27615	29.8589	NaN	4	0	29.2743	30.7509	29.8696	25.3743	29.5406	26.6123	25.8351	27.382	27.2505	26.349
793	P53026	P53026	60S ribosomal protein L10a	Rpl10a	24.916	9.78839	16		0.425307	0.716114	-0.377349	32.8211	32.4438	5	5	33.3161	33.783	32.2658	31.9278	32.813	32.9975	31.8479	32.6713	32.0138	32.6884
794	P53395	P53395	Lipoamide acyltransferase component of branched-chain alpha-keto acid dehydrogenase complex, mitochondrial	Dbt	53.246	8.29979	9		0.26998	0.898642	0.113077	29.4481	29.5612	5	5	29.2447	29.3035	29.2835	29.6902	29.7187	29.0418	29.6251	29.8953	29.6006	29.6432
796	P53702	P53702	Cytochrome c-type heme lyase	Hccs	30.977	8.4109	5		0.302493	0.833798	-0.228178	29.0013	28.7731	5	5	29.7276	29.5215	29.049	28.5252	28.1831	28.8243	28.3997	28.5893	29.2126	28.8395
797	P53810	P53810	Phosphatidylinositol transfer protein alpha isoform	Pitpna	31.893	9.35199	20		0.556977	0.837085	0.136618	32.1843	32.3209	5	5	31.9679	32.3536	32.3287	32.1545	32.1169	31.9599	32.4075	32.3895	32.492	32.3559
798	P53811	P53811	Phosphatidylinositol transfer protein beta isoform	Pitpnb	31.487	8.73779	14		0.25955	0.875875	-0.167067	30.2782	30.1111	5	5	30.2676	30.2249	29.7874	30.4286	30.6824	30.6922	30.3338	29.5701	29.5988	30.3607
800	P53994;P59279	P53994	Ras-related protein Rab-2A	Rab2a	23.547	9.24232	13		0.558822	0.604874	-0.466171	31.5094	31.0432	5	5	31.967	32.1655	31.717	30.7251	30.9724	31.7618	30.5476	30.2528	31.1721	31.4818
801	P53995	P53995	Anaphase-promoting complex subunit 1	Anapc1	215.99	7.80285	15		0.781894	0.48035	-0.525466	29.5793	29.0538	5	5	30.1517	30.0174	29.127	29.1639	29.4364	29.6034	28.6915	28.2381	29.0902	29.6459
802	P53996	P53996	Cellular nucleic acid-binding protein	Cnbp	19.592	9.6951	14		0.4417	0.832303	-0.162416	33.0442	32.8817	5	5	33.1989	32.7941	33.0413	33.533	32.6535	32.9839	33.05	32.9008	32.6889	32.7851
803	P54071	P54071	Isocitrate dehydrogenase [NADP], mitochondrial	Idh2	50.906	10.1302	40		0.658361	0.632979	0.346463	35.1154	35.4618	5	5	34.5985	34.6586	35.2021	35.5203	35.5974	35.2476	35.6442	35.8356	35.6044	34.9774
804	P54276	P54276	DNA mismatch repair protein Msh6	Msh6	151.08	7.6358	12		0.100481	0.959856	-0.0541	28.5284	28.4743	5	5	28.0163	28.5164	28.856	28.5587	28.6947	28.1056	28.4935	28.2052	28.7748	28.7926
806	P54728	P54728	UV excision repair protein RAD23 homolog B	Rad23b	43.512	7.75354	4		0.965543	0.433406	0.543196	NaN	27.7624	0	4	27.4764	26.9827	27.4382	27.1831	26.375	27.1539	28.1332	27.6176	28.1451	27.1215
807	P54729	P54729	NEDD8 ultimate buster 1	Nub1	70.306	8.00039	6		0.375663	0.767474	-0.318417	28.3373	28.0189	5	5	28.439	28.5165	28.3793	28.0968	28.255	29.2739	27.6039	27.1551	28.3602	27.7014
810	P54775	P54775	26S protease regulatory subunit 6B	Psmc4	47.408	9.51375	30		0.285375	0.904581	0.0974174	33.3186	33.416	5	5	33.3938	33.1622	33.3336	33.6546	33.0487	33.2915	33.2003	33.4764	33.7738	33.338
811	P54822	P54822	Adenylosuccinate lyase	Adsl	54.866	7.9505	9		0.474314	0.653135	-0.501988	28.0175	27.5155	5	5	27.6311	28.1005	28.7854	28.7044	26.8662	28.0329	27.4597	27.4322	26.3498	28.303
812	P54823	P54823	Probable ATP-dependent RNA helicase DDX6	Ddx6	54.191	9.00522	21		0.443448	0.792174	-0.211057	31.7851	31.5741	5	5	31.9416	31.9471	32.2155	31.2472	31.5741	32.0443	31.2445	31.4018	31.6795	31.5002
813	P54923	P54923	[Protein ADP-ribosylarginine] hydrolase	Adprh	40.068	8.71144	12		0.500215	0.812298	-0.164498	30.3932	30.2287	5	5	30.1177	30.2066	30.2223	30.9452	30.4743	30.1931	30.2692	30.321	30.2341	30.1263
814	P55002	P55002	Microfibrillar-associated protein 2	Mfap2	20.578	10.3793	9		0.794802	0.583592	0.351511	33.4121	33.7636	5	5	33.6233	33.5732	33.2187	33.788	32.8575	33.2543	33.9947	34.0191	33.9954	33.5546
816	P55097	P55097	Cathepsin K	Ctsk	36.888	8.63716	6		0.415158	0.644738	0.746847	29.7137	29.2575	3	5	30.1907	29.2024	29.7479	27.066	26.3463	29.7759	29.2373	29.6039	28.1912	29.4793
817	P55194	P55194	SH3 domain-binding protein 1	Sh3bp1	74.172	8.02735	4		0.0548891	0.970672	0.0670269	28.7597	28.8267	5	5	29.4402	29.6877	29.0574	27.5064	28.1068	28.5932	28.7959	28.4778	29.1764	29.0903
818	P55258	P55258	Ras-related protein Rab-8A	Rab8a	23.668	8.5338	5		0.103547	0.916136	0.281099	28.5031	28.3755	4	5	29.793	29.7109	28.1007	26.4075	26.4599	29.7107	27.1305	26.6695	28.223	30.1439
819	P55264	P55264	Adenosine kinase	Adk	40.148	9.4638	18		0.348728	0.849533	0.170871	32.7137	32.8846	5	5	32.3631	32.1456	32.8953	33.009	33.1554	32.858	32.9137	32.9157	33.1445	32.5908
821	P55288;Q8BM92;P97291	P55288	Cadherin-11	Cdh11	88.111	7.81323	6		0.455	0.645804	-0.583419	28.3174	28.2424	5	3	27.312	27.5678	28.5469	29.8614	28.2988	28.2551	26.2878	28.0786	27.6547	28.3936
823	P55937	P55937	Golgin subfamily A member 3	Golga3	167.22	8.40878	25		0.1089	0.944675	0.0854259	31.2768	31.3623	5	5	30.954	31.1615	31.9694	31.698	30.6014	31.6401	31.6436	31.537	31.1236	30.867
824	P56135	P56135	ATP synthase subunit f, mitochondrial	Atp5j2	10.344	8.81167	3		0.0962175	0.92363	0.216117	28.1698	27.7821	4	5	29.0972	28.3797	28.32	26.8823	25.1507	29.1539	27.0374	26.8707	27.3707	28.4777
826	P56382	P56382	ATP synthase subunit epsilon, mitochondrial	Atp5e	5.8378	9.0924	3	+	5.34934	0	2.74461	NaN	29.565	0	5	26.8964	26.7759	26.8231	27.423	26.1836	29.3912	29.805	29.919	29.6651	29.0448
827	P56391	P56391	Cytochrome c oxidase subunit 6B1	Cox6b1	10.071	8.10109	1		0.0570988	0.968533	-0.0808327	NaN	27.2909	0	4	26.0169	27.1903	27.0261	26.9849	27.5701	27.3265	27.1455	25.2206	27.7484	26.9431
828	P56393	P56393	Cytochrome c oxidase subunit 7B, mitochondrial	Cox7b	9.0113	9.87212	1		0.105172	0.912837	0.307531	30.2573	31.5057	5	4	30.4902	30.3252	31.0277	31.212	28.2313	31.6317	31.6422	31.7625	26.8011	30.9866
829	P56395	P56395	Cytochrome b5	Cyb5a	15.241	9.19471	4		1.21358	0.258595	0.833186	29.8426	30.6758	5	5	29.4277	29.7762	30.4499	30.1854	29.3736	30.8424	31.1181	31.4194	30.4212	29.5777
830	P56399	P56399	Ubiquitin carboxyl-terminal hydrolase 5	Usp5	95.832	9.2409	40		0.0249557	0.994078	0.0107422	33.0631	33.0739	5	5	32.9238	32.9402	32.9194	33.5823	32.9499	32.9606	33.0442	33.0545	33.3513	32.9587
831	P56480	P56480	ATP synthase subunit beta, mitochondrial	Atp5b	56.3	10.2968	39		0.0221439	0.994459	0.0131996	35.9283	35.9415	5	5	35.7944	35.7478	35.6973	36.47	35.932	35.722	36.0782	36.2709	36.1639	35.4725
832	P56546	P56546	C-terminal-binding protein 2	Ctbp2	48.956	8.6113	16		0.0360232	0.994146	0.00986938	29.9604	29.9702	5	5	29.8678	29.8995	30.0272	30.1968	29.8104	30.0967	30.0534	30.0837	29.8036	29.8138
833	P56671	P56671	Myc-associated zinc finger protein	Maz	48.769	8.60243	7		0.130771	0.918885	0.118381	29.5513	29.6697	5	5	29.4715	29.7134	30.4269	28.8084	29.3363	29.8484	29.6033	29.9489	30.1005	28.8472
834	P56959	P56959	RNA-binding protein FUS	Fus	52.673	8.21192	3		0.904079	0.365109	-0.82739	28.173	28.0677	5	3	27.7324	28.2035	28.4044	27.9287	28.5961	28.4727	26.2521	27.7886	26.2729	27.9418
836	P57716	P57716	Nicastrin	Ncstn	78.491	7.68719	3		0.0960124	0.949075	-0.0857712	27.9142	27.5453	4	4	27.3888	27.6796	26.705	27.9291	28.6595	27.2893	27.6781	27.7518	27.5983	27.6157
837	P57759	P57759	Endoplasmic reticulum resident protein 29	Erp29	28.823	8.20666	8		0.52129	0.569888	0.715791	27.5406	28.6958	5	4	27.1582	27.2105	27.9843	27.6419	27.7083	27.0433	28.7677	29.641	29.3313	26.4988
838	P57776;REV__Q03173	P57776	Elongation factor 1-delta	Eef1d	31.293	9.93783	31		1.04865	0.462772	0.442187	33.8946	34.3368	5	5	34.0018	34.1014	34.392	33.6873	33.2908	34.0378	34.3124	34.4586	34.764	34.1113
839	P57780	P57780	Alpha-actinin-4	Actn4	104.98	10.0238	75		0.0761115	0.977784	0.0314888	36.1202	36.1517	5	5	35.9611	35.8092	36.0869	36.3384	36.4055	35.9574	36.0759	36.0121	36.5185	36.1947
841	P57787	P57787	Monocarboxylate transporter 4	Slc16a3	50.373	8.10602	2		1.76006	0.0789027	-1.36911	28.2767	NaN	5	0	28.723	29.0759	28.1505	27.6495	27.7844	26.716	27.0237	26.0348	28.2322	26.531
842	P58021	P58021	Transmembrane 9 superfamily member 2	Tm9sf2	75.329	8.66382	4		0.0482512	0.969293	-0.107975	29.6179	29.5099	5	5	29.9303	30.7031	30.2328	28.8865	28.3367	31.4177	27.7712	29.2172	28.5867	30.5567
843	P58022	P58022	Lysyl oxidase homolog 2	Loxl2	87.002	9.14473	15		0.278713	0.918411	-0.0685684	32.6044	32.5358	5	5	32.6497	32.5703	32.6968	32.5123	32.5928	32.8136	32.4262	32.7307	32.3331	32.3754
844	P58044	P58044	Isopentenyl-diphosphate Delta-isomerase 1	Idi1	26.289	8.2216	6		0.327861	0.770588	0.382279	28.0969	28.1215	4	5	28.5407	28.5166	27.8536	26.3086	27.4767	27.1816	28.7411	28.3859	28.5792	27.7198
846	P58252	P58252	Elongation factor 2	Eef2	95.313	10.2625	87		0.158332	0.949459	0.0553078	36.4646	36.5199	5	5	36.1699	36.4191	36.65	36.3659	36.718	36.2581	36.5312	36.3733	36.6824	36.7545
847	P58281	P58281	Dynamin-like 120 kDa protein, mitochondrial;Dynamin-like 120 kDa protein, form S1	Opa1	111.34	8.29451	18		1.74118	0.409878	0.365255	30.2412	30.6064	5	5	30.2796	30.3642	30.2907	30.305	29.9664	30.719	30.5077	30.5525	30.9263	30.3267
848	P58389	P58389	Serine/threonine-protein phosphatase 2A activator	Ppp2r4	36.71	8.59419	13		0.146603	0.915273	0.117384	29.5441	29.6615	5	5	28.7391	29.0843	29.7327	29.8858	30.2789	29.8223	29.8081	29.6136	29.8984	29.1652
849	P58404	P58404	Striatin-4	Strn4	81.644	7.9374	7		0.446997	0.651825	-0.537875	28.3731	28.3767	5	4	28.6257	28.1043	28.3366	28.4168	28.3818	28.2195	28.3702	28.5629	28.3542	25.6691
850	P58462;P58463;Q9DBY0	P58462	Forkhead box protein P1	Foxp1	78.832	7.74425	3		0.402562	0.741751	-0.347676	27.7458	NaN	4	0	27.0259	28.2467	27.8613	27.8492	26.3979	27.12	27.3264	26.5998	27.7339	26.8625
852	P58771	P58771	Tropomyosin alpha-1 chain	Tpm1	32.68	10.2813	47		0.664153	0.476861	0.736363	34.2516	34.988	5	5	35.0379	35.2086	34.2812	34.3094	32.4209	35.4758	35.2187	35.3417	34.7235	34.18
853	P58774	P58774	Tropomyosin beta chain	Tpm2	32.836	10.5158	49		1.02179	0.296509	0.916187	35.3278	36.244	5	5	36.1011	35.9925	35.4598	35.3835	33.7022	36.8199	36.5313	36.392	35.8777	35.5992
856	P59024	P59024	Peptidyl-prolyl cis-trans isomerase FKBP14	Fkbp14	24.251	9.38225	14		1.14259	0.357372	0.600463	31.5217	32.1222	5	5	31.7567	31.583	31.8347	31.5369	30.8974	31.6824	32.1503	32.8734	32.3504	31.5545
857	P59235	P59235	Nucleoporin Nup43	Nup43	41.989	8.26834	6		0.939809	0.338884	0.873566	28.0296	28.2433	3	5	28.2279	27.9849	27.8761	26.595	26.1648	27.4264	28.0758	28.8574	28.0329	28.824
858	P59325	P59325	Eukaryotic translation initiation factor 5	Eif5	48.968	9.18715	18		1.12201	0.40375	0.517782	31.768	32.2857	5	5	31.8198	31.8892	32.4752	31.4564	31.1992	32.2346	32.4986	32.6696	32.0597	31.9662
859	P59326	P59326	YTH domain-containing family protein 1	Ythdf1	60.878	8.48157	7		0.134237	0.920171	-0.122411	29.4649	29.3425	5	5	29.693	29.6228	30.3143	29.261	28.4334	29.5478	28.766	29.2149	29.553	29.6307
860	P59328	P59328	WD repeat and HMG-box DNA-binding protein 1	Wdhd1	124.25	7.13456	4		0.523844	0.690188	-0.328522	27.3004	NaN	4	0	27.0314	27.0912	27.5555	27.6192	26.9356	26.6502	26.5047	26.9957	27.8982	26.5415
862	P59900	P59900	EMILIN-3	Emilin3	82.395	8.51522	20		1.60532	0.308679	0.505733	30.3994	30.9052	5	5	30.1189	30.3102	30.798	30.7445	30.0255	31.019	30.8561	30.8453	31.1765	30.629
863	P59999	P59999	Actin-related protein 2/3 complex subunit 4	Arpc4	19.667	8.85017	8		0.270503	0.842771	0.24177	29.3613	29.603	5	5	29.1744	29.0609	30.0589	28.3558	30.1563	29.9352	29.279	29.4083	30.068	29.3246
865	P60122	P60122	RuvB-like 1	Ruvbl1	50.213	9.41529	29		0.0621212	0.971303	-0.0485394	32.8117	32.7631	5	5	32.6408	32.5671	32.5396	33.403	32.908	31.9649	33.1938	33.2252	32.6595	32.7723
866	P60229	P60229	Eukaryotic translation initiation factor 3 subunit E	Eif3e	52.22	8.74628	17		0.309094	0.879399	0.135169	30.7776	30.9128	5	5	30.6146	30.6284	31.0848	30.6543	30.9058	31.4836	30.8464	30.4755	30.846	30.9123
868	P60335	P60335	Poly(rC)-binding protein 1	Pcbp1	37.497	9.91608	22		0.246191	0.89681	-0.128454	34.0839	33.9554	5	5	33.7624	33.8121	34.3229	34.2369	34.2852	33.8494	33.6631	34.1151	34.5638	33.5858
869	P60670	P60670	Nuclear protein localization protein 4 homolog	Nploc4	68.016	8.56619	10		0.149038	0.918184	0.101842	30.3163	30.4181	5	5	30.444	31.1255	30.3029	29.8562	29.8527	30.5139	30.1091	30.1972	30.4831	30.7872
872	P60766	P60766	Cell division control protein 42 homolog	Cdc42	21.258	9.4994	9		0.243986	0.875336	0.189388	31.5574	31.7468	5	5	31.5483	31.7125	31.9671	31.0477	31.5113	32.8497	31.4437	31.4265	31.3242	31.6897
873	P60843	P60843	Eukaryotic initiation factor 4A-I	Eif4a1	46.153	10.0916	40		0.378888	0.897753	-0.0941765	34.982	34.8878	5	5	35.003	34.862	35.1505	34.9155	34.979	35.048	34.9281	34.6015	35.134	34.7276
874	P60867	P60867	40S ribosomal protein S20	Rps20	13.373	10.2953	8		0.870172	0.414076	0.684508	33.1493	33.8338	5	5	32.8956	33.9257	33.6941	32.2442	32.9868	33.4203	33.1114	33.9088	34.7624	33.9659
877	P61027;Q9DD03	P61027	Ras-related protein Rab-10	Rab10	22.541	7.99234	5		0.21899	0.86874	-0.247424	27.4578	27.0237	5	2	27.8095	27.8155	26.0889	27.1144	28.4606	27.7792	26.9397	27.2854	26.5343	27.5131
878	P61079;P61080;Q6ZWY6	P61079	Ubiquitin-conjugating enzyme E2 D3	Ube2d3	16.687	9.39	5		1.24026	0.191258	1.15876	29.4653	30.6241	5	5	28.6975	28.8322	30.3821	29.5443	29.8704	30.7008	30.7321	30.8236	31.7231	29.1406
879	P61082	P61082	NEDD8-conjugating enzyme Ubc12	Ube2m	20.9	9.15079	7		1.19655	0.273104	0.768913	30.5656	31.3345	5	5	30.5982	30.9558	31.2792	30.3872	29.6076	31.2762	31.6158	31.6872	31.5802	30.5132
881	P61089;Q9CQ37	P61089	Ubiquitin-conjugating enzyme E2 N	Ube2n	17.138	8.98235	11		0.628166	0.524653	0.617922	29.8972	30.5152	5	5	29.619	30.1319	31.2572	29.2021	29.276	30.6647	31.2501	30.9947	29.6522	30.0141
882	P61161	P61161	Actin-related protein 2	Actr2	44.76	9.47252	20		0.284871	0.904734	-0.0899834	32.211	32.121	5	5	31.8845	32.3102	32.3726	31.9741	32.5134	32.1459	32.0305	32.0357	32.058	32.3348
883	P61164	P61164	Alpha-centractin	Actr1a	42.613	8.90277	19		0.862088	0.474603	0.483464	30.7368	31.2203	5	5	30.0569	30.6539	30.8073	30.8454	31.3205	30.7174	31.1064	31.0473	31.99	31.2401
884	P61202	P61202	COP9 signalosome complex subunit 2	Cops2	51.596	8.95411	19		1.30158	0.444692	0.38973	30.999	31.3887	5	5	30.6389	31.0293	31.22	30.9532	31.1536	31.4201	31.4851	31.3565	31.7591	30.9229
885	P84078;P61205	P84078;P61205	ADP-ribosylation factor 1;ADP-ribosylation factor 3	Arf1;Arf3	20.697	9.47881	9		0.432069	0.633568	-0.721741	31.6048	30.883	5	5	32.6554	32.5472	31.6474	30.5565	30.6174	32.3378	31.123	31.0335	28.6245	31.2964
886	P61211	P61211	ADP-ribosylation factor-like protein 1	Arl1	20.411	8.41312	5		0.864622	0.337115	-1.08221	28.247	28.007	5	3	28.0321	28.6091	28.5748	27.6188	28.4004	26.7416	25.6507	28.6892	26.1525	28.5901
887	P61222	P61222	ATP-binding cassette sub-family E member 1	Abce1	67.314	9.08329	23		0.309971	0.857201	0.181179	32.0024	32.1836	5	5	31.6991	32.0704	32.2909	31.5235	32.4283	32.2844	31.7655	31.8319	32.7731	32.2632
888	P61255	P61255	60S ribosomal protein L26	Rpl26	17.258	10.0798	14		0.010322	0.994488	0.0128563	32.9339	32.9467	5	5	33.0081	33.7122	32.9827	31.8392	33.1272	33.6562	32.3464	32.2058	33.5091	33.0161
890	Q9CQL1;P61327	Q9CQL1;P61327	Protein mago nashi homolog 2;Protein mago nashi homolog	Magohb;Magoh	17.091	8.73278	10		0.483992	0.73405	0.288825	29.1923	29.4811	5	5	29.029	29.1647	29.5366	28.9399	29.291	29.0378	30.3659	29.4164	28.9292	29.656
891	P61358	P61358	60S ribosomal protein L27	Rpl27	15.798	9.94319	11		0.208304	0.881916	0.195376	32.3978	32.5931	5	5	32.7474	33.2181	32.1787	31.3869	32.4577	33.0174	31.9961	32.3823	33.1917	32.3782
893	P61514	P61514	60S ribosomal protein L37a	Rpl37a	10.275	10.4243	6		0.175183	0.8946	-0.213494	33.4159	33.2025	5	5	33.5676	33.956	32.6408	33.1254	33.7898	33.9797	32.1846	32.3178	33.3143	34.2158
895	P61750	P61750	ADP-ribosylation factor 4	Arf4	20.396	9.56213	10		0.970685	0.371104	-0.709944	32.1918	31.4818	5	5	32.5529	32.1381	32.2279	32.2851	31.7549	32.3768	31.5162	31.3922	30.1784	31.9455
897	P61924	P61924	Coatomer subunit zeta-1	Copz1	20.198	9.10924	4		0.0690754	0.958498	-0.114691	29.5082	29.3935	5	5	28.82	29.4399	28.2719	30.3861	30.6231	28.5664	28.7665	30.7653	29.1222	29.7472
898	P61957;Q9Z172	P61957;Q9Z172	Small ubiquitin-related modifier 2;Small ubiquitin-related modifier 3	Sumo2;Sumo3	10.871	9.031	3		1.99865	0.0522979	-1.40271	28.3874	NaN	5	0	28.1848	28.1691	28.7954	27.7109	29.0768	27.332	25.681	26.9558	27.4275	27.5271
899	P61961	P61961	Ubiquitin-fold modifier 1	Ufm1	9.1175	9.15131	5		1.56811	0.179842	0.848902	29.0864	29.9353	5	5	29.4063	29.6817	29.1938	28.5855	28.5647	29.5129	29.6702	30.2049	30.6807	29.6076
900	P61963	P61963	DDB1- and CUL4-associated factor 7	Dcaf7	38.926	8.9603	10		0.0626563	0.981259	0.0325256	30.7272	30.7597	5	5	30.472	30.5889	30.5056	31.1056	30.9639	30.3079	30.6161	30.8667	30.9532	31.0547
901	P61965	P61965	WD repeat-containing protein 5	Wdr5	36.588	8.84942	9		0.286387	0.877417	0.147982	30.4272	30.5751	5	5	30.0781	30.0836	30.3129	30.9604	30.7008	30.1089	30.5146	30.8309	30.807	30.6144
902	P61971	P61971	Nuclear transport factor 2	Nutf2	14.478	8.79781	5		0.486183	0.637259	-0.524129	29.4185	28.8944	5	5	29.0302	28.6396	28.7553	30.2237	30.4439	28.5007	28.8682	30.0512	28.9539	28.098
903	P61979	P61979	Heterogeneous nuclear ribonucleoprotein K	Hnrnpk	50.976	10.1053	34		1.25948	0.643635	0.222092	34.9767	35.1988	5	5	34.8615	34.9778	35.118	35.0263	34.8998	34.9867	35.187	35.244	35.5015	35.0747
904	P61982	P61982	14-3-3 protein gamma;14-3-3 protein gamma, N-terminally processed	Ywhag	28.302	9.84456	21		0.0440172	0.989201	-0.0195839	33.6823	33.6627	5	5	33.8055	33.4651	33.634	33.9519	33.5551	33.4059	33.7529	33.805	34.0233	33.3264
906	P62082	P62082	40S ribosomal protein S7	Rps7	22.127	10.081	24		1.17847	0.373478	0.548459	33.588	34.1364	5	5	33.4359	33.8142	34.1283	32.8881	33.6732	34.1076	33.7959	34.2014	34.6769	33.9002
907	P62137	P62137	Serine/threonine-protein phosphatase PP1-alpha catalytic subunit	Ppp1ca	37.54	9.66594	23		0.531725	0.785687	-0.188382	33.4059	33.2175	5	5	33.3346	33.1611	33.289	33.7233	33.5213	33.1505	33.2532	33.0983	33.7042	32.8813
908	P62141	P62141	Serine/threonine-protein phosphatase PP1-beta catalytic subunit	Ppp1cb	37.186	8.96148	22		0.469307	0.785751	-0.205642	31.0438	30.8382	5	5	31.1787	30.7562	30.9073	31.4582	30.9186	30.9575	30.8426	30.703	31.3337	30.3541
909	P62192	P62192	26S protease regulatory subunit 4	Psmc1	49.184	9.31775	23		0.382672	0.854515	0.153467	32.4739	32.6273	5	5	32.6142	32.7844	32.5752	32.2952	32.1003	32.4849	32.3557	32.413	32.9513	32.9317
910	P62196	P62196	26S protease regulatory subunit 8	Psmc5	45.626	9.38783	27		0.995944	0.475705	0.433635	32.6288	33.0625	5	5	32.3895	32.2497	32.8946	33.0669	32.5435	32.7918	33.2917	33.3692	33.3593	32.5004
911	P62242	P62242	40S ribosomal protein S8	Rps8	24.205	10.3939	20		0.62562	0.562822	-0.522162	34.7982	34.276	5	5	35.0651	35.257	33.8046	34.3742	35.49	34.8535	33.5282	34.0666	34.0196	34.9122
912	P62245	P62245	40S ribosomal protein S15a	Rps15a	14.839	9.63335	10		0.176025	0.899947	0.173584	31.7413	31.9148	5	5	31.879	32.2648	32.3191	30.6672	31.5762	32.6585	31.4869	32.1978	31.2887	31.9423
915	P62259	P62259	14-3-3 protein epsilon	Ywhae	29.174	9.86372	22		0.147857	0.915944	0.120339	33.913	34.0333	5	5	33.3638	33.2508	34.0808	34.5233	34.3463	33.7205	34.3326	34.3694	34.253	33.4912
916	P62264	P62264	40S ribosomal protein S14	Rps14	16.273	10.4619	11		0.569229	0.718071	0.264233	33.6135	33.8777	5	5	33.4664	33.6026	33.9916	33.2072	33.7998	33.6677	33.5085	33.8696	34.5423	33.8006
917	P62267	P62267	40S ribosomal protein S23	Rps23	15.807	10.2152	10		0.00680963	0.99428	0.0051712	33.5045	33.5096	5	5	33.4615	34.1312	33.1517	32.8566	33.9213	33.4314	33.2483	33.7401	33.3698	33.7585
918	P62270	P62270	40S ribosomal protein S18	Rps18	17.718	9.67754	14		0.550141	0.586235	0.544611	31.883	32.4276	5	5	32.2318	32.7877	32.0073	30.2382	32.1501	33.0627	32.215	31.9734	32.6245	32.2625
919	P62274	P62274	40S ribosomal protein S29	Rps29	6.6767	9.68807	5		1.33928	0.148876	1.34048	29.3068	30.6473	5	5	29.5614	29.3386	31.0716	27.6714	28.8911	30.3499	31.0462	30.8742	30.6545	30.3117
920	P62281	P62281	40S ribosomal protein S11	Rps11	18.431	9.93769	17		1.26136	0.403861	0.463056	33.0775	33.5406	5	5	32.7207	33.3159	33.3586	32.5263	33.4661	33.7161	33.2405	33.5833	33.5321	33.631
921	P62301	P62301	40S ribosomal protein S13	Rps13	17.222	9.39524	9		0.138744	0.903831	0.220235	31.0423	31.2626	5	5	31.2583	32.0296	31.6752	28.9659	31.2827	32.3207	30.907	30.7056	31.0605	31.3191
925	P62315	P62315	Small nuclear ribonucleoprotein Sm D1	Snrpd1	13.281	9.46325	2		0.441264	0.64435	-0.634784	30.3469	29.7121	5	5	31.2186	31.3777	29.5616	29.0692	30.5074	30.799	28.4667	29.4931	28.9858	30.8161
926	P62317	P62317	Small nuclear ribonucleoprotein Sm D2	Snrpd2	13.527	9.13014	7		0.219059	0.849164	0.347767	29.8588	30.7008	5	4	29.7747	30.1272	31.0664	28.5295	29.7963	30.9135	30.594	30.5118	30.7841	28.2296
927	P62320	P62320	Small nuclear ribonucleoprotein Sm D3	Snrpd3	13.916	9.48676	6		0.00743921	0.995799	-0.00581856	31.1521	31.1463	5	5	30.8855	31.0783	31.1553	30.7866	31.855	31.5461	30.5284	31.2593	31.4632	30.9345
929	P62334	P62334	26S protease regulatory subunit 10B	Psmc6	44.172	9.17993	22		0.593666	0.770216	0.193972	31.9044	32.0984	5	5	31.8132	31.8988	31.801	32.3121	31.697	31.7978	32.3984	32.1934	32.2489	31.8536
931	P62488	P62488	DNA-directed RNA polymerase II subunit RPB7	Polr2g	19.294	8.02971	5		0.108823	0.924272	0.141769	26.8315	27.1835	5	4	27.2611	26.2551	26.2475	27.3207	27.0731	26.1324	26.6557	26.3852	27.1727	28.5203
934	P62702	P62702	40S ribosomal protein S4, X isoform	Rps4x	29.597	10.1462	24		0.271126	0.84897	0.227517	34.52	34.7475	5	5	34.4625	35.3238	34.6402	33.5142	34.6593	34.968	34.0775	34.5409	34.9719	35.1791
936	P62717	P62717	60S ribosomal protein L18a	Rpl18a	20.732	9.95655	17		0.140385	0.910131	-0.156223	33.1538	32.9976	5	5	33.4705	33.8644	32.8306	32.2452	33.3584	33.4632	32.3826	33.0094	32.2118	33.9209
937	P62737;P63268	P62737;P63268	Actin, aortic smooth muscle;Actin, gamma-enteric smooth muscle	Acta2;Actg2	42.009	8.93788	44		0.125865	0.915817	-0.158246	30.9912	30.8329	5	5	30.8091	30.4204	29.9933	31.4896	32.2434	31.7911	31.0001	30.4077	30.4731	30.4926
940	P62751	P62751	60S ribosomal protein L23a	Rpl23a	17.695	9.74449	11		0.497243	0.58992	0.646584	31.343	31.9896	5	5	31.6924	32.2876	31.4327	29.4768	31.8258	31.8029	31.5389	31.5283	33.4302	31.6479
941	P62754	P62754	40S ribosomal protein S6	Rps6	28.68	10.3778	21		0.249027	0.858693	0.238079	34.1988	34.4369	5	5	34.6635	34.8973	34.2272	33.0619	34.1442	35.0974	33.7808	34.0312	34.5601	34.7151
942	P62806	P62806	Histone H4	Hist1h4a	11.367	10.066	12		1.20789	0.162218	-1.56163	33.0764	31.5148	5	5	33.2442	33.9499	31.6881	32.3347	34.165	32.0398	30.6075	30.3423	31.2347	33.3494
943	P62814	P62814	V-type proton ATPase subunit B, brain isoform	Atp6v1b2	56.55	8.73121	12		0.294484	0.86544	-0.177944	30.7493	30.5714	5	5	30.4457	30.5478	30.2841	31.4395	31.0296	30.3353	30.4216	30.8023	30.2822	31.0154
944	P62821;P61028;Q8K386	P62821	Ras-related protein Rab-1A	Rab1A	22.677	9.679	13		0.447548	0.796249	-0.197186	33.0286	32.8314	5	5	32.9953	33.2721	33.2828	32.5292	33.0637	33.317	32.5221	32.534	32.8197	32.9643
945	P62827;Q61820	P62827	GTP-binding nuclear protein Ran	Ran	24.423	10.4049	24		1.58015	0.467089	0.328603	34.9476	35.2762	5	5	34.6956	34.8689	35.3167	34.7835	35.0732	35.2111	35.2059	35.2663	35.2401	35.4575
946	P62830	P62830	60S ribosomal protein L23	Rpl23	14.865	9.58352	13		0.486143	0.731012	0.29152	31.8249	32.1164	5	5	31.5133	32.3877	31.7044	31.2016	32.3175	32.1261	31.6227	32.2599	32.5816	31.9918
949	P62843	P62843	40S ribosomal protein S15	Rps15	17.04	9.50163	7		0.705317	0.491896	0.586781	30.9025	31.4893	5	5	30.36	31.601	31.907	30.2255	30.4192	31.6937	30.9517	31.2174	32.2436	31.3402
950	P62849	P62849	40S ribosomal protein S24	Rps24	15.423	9.34834	5		0.383545	0.792964	0.234955	30.3718	30.6067	5	5	30.2623	31.0573	29.5265	30.3655	30.6474	30.4329	30.8639	30.3209	30.628	30.788
951	P62852	P62852	40S ribosomal protein S25	Rps25	13.742	9.39342	6		0.0981145	0.932727	-0.145515	30.4822	30.3367	5	5	30.3749	31.0276	30.8627	28.7022	31.4438	30.8253	29.7893	29.7019	31.075	30.2921
953	P62858	P62858	40S ribosomal protein S28	Rps28	7.8409	9.2317	2		0.738103	0.463398	-0.706864	29.4665	28.7596	5	5	28.81	29.7804	30.0811	28.9376	29.7235	30.0712	28.6639	27.5797	29.1425	28.3409
954	P62862	P62862	40S ribosomal protein S30	Fau	6.6478	8.76459	2		0.0355185	0.981509	0.0830029	26.6824	NaN	4	0	25.7615	25.9906	29.4754	25.502	26.991	25.7486	27.4675	27.8203	26.5209	26.5781
955	P62869	P62869	Transcription elongation factor B polypeptide 2	Tceb2	13.17	8.84649	6	+	1.74706	0.0461333	-2.14836	29.2687	NaN	4	0	28.9009	28.9124	29.3734	29.888	26.5112	27.7646	25.6868	25.75	26.2182	27.4246
956	P62874;Q61011	P62874	Guanine nucleotide-binding protein G(I)/G(S)/G(T) subunit beta-1	Gnb1	37.377	9.43122	21		0.273868	0.882044	-0.135756	32.1976	32.0618	5	5	32.2608	31.936	31.9895	32.7776	32.0241	31.6104	31.8882	32.2905	32.1645	32.3555
957	P62878	P62878	E3 ubiquitin-protein ligase RBX1;E3 ubiquitin-protein ligase RBX1, N-terminally processed	Rbx1	12.274	9.28785	2	+	2.0594	0.0197091	-2.83612	29.6527	29.9097	5	1	30.1718	29.4887	28.7762	30.0095	29.8172	25.8222	26.4878	25.7288	26.1342	29.9097
958	P62880	P62880	Guanine nucleotide-binding protein G(I)/G(S)/G(T) subunit beta-2	Gnb2	37.331	9.87132	22		1.89987	0.561472	-0.233898	33.6125	33.3786	5	5	33.6716	33.6042	33.5271	33.8065	33.4532	33.3116	33.3934	33.2926	33.3728	33.5226
959	P62889	P62889	60S ribosomal protein L30	Rpl30	12.784	10.0838	10		0.111629	0.917706	0.173893	32.8021	32.976	5	5	32.7295	33.1787	34.037	31.1913	32.8742	33.9058	32.0395	32.3531	33.6173	32.9644
960	P62900	P62900	60S ribosomal protein L31	Rpl31	14.463	9.66722	14		0.280577	0.797814	0.360485	31.5411	31.9016	5	5	32.4728	32.5025	31.6428	29.8534	31.2338	32.5719	31.2678	31.7259	32.3039	31.6382
961	P62908	P62908	40S ribosomal protein S3	Rps3	26.674	9.78627	28		0.0578561	0.970737	-0.0520195	33.7374	33.6854	5	5	33.431	34.0156	34.0629	32.7997	34.3777	34.0567	33.166	33.7745	33.9107	33.519
962	P62911;P17932	P62911	60S ribosomal protein L32	Rpl32	15.86	9.90096	12		0.161904	0.9042	0.154152	32.4895	32.6436	5	5	32.8089	33.2157	32.3684	31.3318	32.7225	32.9208	32.3744	32.2172	33.2385	32.4671
964	P62918	P62918	60S ribosomal protein L8	Rpl8	28.024	10.2594	23		0.125178	0.918551	-0.136053	34.3543	34.2182	5	5	34.5044	35.2492	33.474	33.7957	34.748	34.4915	33.43	34.0629	34.1165	34.99
965	P62960;Q9JKB3;Q9Z2C8	P62960	Nuclease-sensitive element-binding protein 1	Ybx1	35.73	8.63429	7		0.655359	0.504075	0.617879	29.3328	29.6103	4	5	28.7278	29.3072	30.1565	27.6311	29.1396	29.7252	29.8636	30.0596	28.7993	29.604
967	P62965	P62965	Cellular retinoic acid-binding protein 1	Crabp1	15.591	9.53414	12		0.390318	0.768837	0.292939	32.0331	32.326	5	5	31.3572	31.5823	31.9996	32.6662	32.5602	31.6907	32.4649	32.927	32.5107	32.0367
968	P62983;P0CG49;P0CG50	P62983;P0CG49;P0CG50	Ubiquitin-40S ribosomal protein S27a;Ubiquitin;40S ribosomal protein S27a;Polyubiquitin-B;Ubiquitin;Polyubiquitin-C;Ubiquitin;Ubiquitin-related 1;Ubiquitin-related 2	Rps27a;Ubb;Ubc	17.951	10.1399	12		0.632811	0.668971	0.300104	33.1658	33.4659	5	5	32.7674	33.6366	33.715	32.7307	32.9794	33.3232	33.364	33.579	33.78	33.2833
970	P62996	P62996	Transformer-2 protein homolog beta	Tra2b	33.665	9.35557	12		0.309895	0.785393	-0.360509	31.6006	31.2401	5	5	32.4297	32.2888	31.6493	31.5315	30.1039	31.9074	30.5353	30.8258	31.0541	31.8781
971	P63001;P60764;Q05144	P63001;P60764;Q05144	Ras-related C3 botulinum toxin substrate 1;Ras-related C3 botulinum toxin substrate 3;Ras-related C3 botulinum toxin substrate 2	Rac1;Rac3;Rac2	21.45	9.83936	10		0.0615052	0.971637	-0.0453941	32.6407	32.5953	5	5	32.5188	33.0872	32.7155	32.0041	32.878	33.0472	32.7352	32.52	31.9163	32.7578
972	P63005	P63005	Platelet-activating factor acetylhydrolase IB subunit alpha	Pafah1b1	46.67	9.14504	24		0.103179	0.958793	0.0541622	31.9893	32.0435	5	5	31.7639	31.6285	31.872	32.2766	32.4057	31.7251	32.2984	32.2994	32.123	31.7716
973	P63017	P63017	Heat shock cognate 71 kDa protein	Hspa8	70.87	10.3208	55		0.439723	0.867296	-0.12636	36.3534	36.227	5	5	36.1887	36.1607	36.348	36.6291	36.4403	35.882	36.1265	36.3569	36.3814	36.3882
975	P63028	P63028	Translationally-controlled tumor protein	Tpt1	19.462	10.1684	10		0.0824667	0.963782	0.0555641	33.1981	33.2537	5	5	32.9278	32.9881	33.404	33.3754	33.2954	32.6386	32.9593	33.5711	33.9171	33.1824
976	P63037	P63037	DnaJ homolog subfamily A member 1	Dnaja1	44.868	9.2058	18		0.569014	0.76889	-0.204246	32.1157	31.9115	5	5	32.4329	32.3438	32.1667	31.7412	31.8938	31.8019	31.5798	32.2031	31.8628	32.1096
977	P63038	P63038	60 kDa heat shock protein, mitochondrial	Hspd1	60.955	9.82956	47		1.2213	0.38858	0.502026	34.551	35.053	5	5	34.2575	34.3285	34.5034	35.0956	34.5698	34.6402	35.1586	35.4138	35.4164	34.636
978	P63073	P63073	Eukaryotic translation initiation factor 4E	Eif4e	25.053	9.36981	11		0.56927	0.769951	0.200208	31.5791	31.7794	5	5	31.6085	31.4867	31.9133	31.6024	31.2848	31.3418	31.9058	31.9256	32.1058	31.6178
980	P63085	P63085	Mitogen-activated protein kinase 1	Mapk1	41.275	9.19446	20		0.0119104	0.994502	-0.00930786	31.9585	31.9492	5	5	32.2676	32.4265	32.3862	31.4454	31.267	32.1925	31.8269	31.6554	32.0602	32.011
982	P63089	P63089	Pleiotrophin	Ptn	18.869	9.81995	8		0.0900725	0.930704	0.21446	31.923	32.1375	5	5	31.9037	30.9908	33.1684	31.1399	32.4122	32.4887	32.506	32.8725	33.669	29.1511
983	P63094;Q6R0H7;Q8CGK7	P63094;Q6R0H7	Guanine nucleotide-binding protein G(s) subunit alpha isoforms short;Guanine nucleotide-binding protein G(s) subunit alpha isoforms XLas	Gnas	45.663	8.82705	15		0.168871	0.909922	-0.116454	30.6918	30.5754	5	5	30.6037	30.8821	30.4339	30.6171	30.9222	30.9056	30.0901	29.8403	31.0906	30.9503
984	P63101	P63101	14-3-3 protein zeta/delta	Ywhaz	27.771	10.102	24		0.030925	0.990057	-0.0177498	34.3645	34.3468	5	5	34.2288	34.192	34.1878	34.6481	34.566	33.7985	34.2836	34.4567	34.8738	34.3214
985	P63139	P63139	Nuclear transcription factor Y subunit beta	Nfyb	22.787	8.26996	2		0.163938	0.88892	0.282639	NaN	27.0747	0	5	25.8114	27.3429	27.1559	27.2534	26.3966	27.94	27.1937	28.3943	26.956	24.8894
987	P63158	P63158	High mobility group protein B1	Hmgb1	24.893	10.5614	20		1.57009	0.180019	0.835699	34.1902	35.0259	5	5	33.9266	34.5749	34.9955	33.7532	33.7006	34.8302	35.2438	35.4266	35.1871	34.4415
988	P63166	P63166	Small ubiquitin-related modifier 1	Sumo1	11.557	8.70796	3		0.15565	0.909738	0.138073	28.8197	28.9578	5	5	28.1054	28.1896	29.0988	29.3058	29.3989	28.5819	28.9919	28.6787	29.7149	28.8214
989	P63168;Q9D0M5	P63168;Q9D0M5	Dynein light chain 1, cytoplasmic;Dynein light chain 2, cytoplasmic	Dynll1;Dynll2	10.366	9.68426	5		0.0370235	0.988154	-0.0305481	31.4242	31.3937	5	5	31.5448	31.6036	32.0161	30.6803	31.2764	31.592	31.0557	30.9265	31.4359	31.9583
990	P63242;Q8BGY2	P63242;Q8BGY2	Eukaryotic translation initiation factor 5A-1;Eukaryotic translation initiation factor 5A-2	Eif5a;Eif5a2	16.832	9.7348	7		1.39866	0.226698	0.766335	31.8583	32.6246	5	5	31.5659	31.607	32.442	31.8978	31.7788	32.3823	32.8436	33.1757	33.0353	31.6863
991	P63254	P63254	Cysteine-rich protein 1	Crip1	8.5497	9.58195	6		0.380676	0.700694	0.524405	30.4925	31.0169	5	5	31.1788	31.3325	31.7946	29.1672	28.9892	31.0577	30.971	31.6035	30.9234	30.5288
992	P63260	P63260	Actin, cytoplasmic 2;Actin, cytoplasmic 2, N-terminally processed	Actg1	41.792	11.2783	46		0.238736	0.915648	-0.0766525	38.6064	38.5297	5	5	38.5134	38.5403	38.2972	38.9277	38.7532	38.2974	38.5803	38.4778	38.7647	38.5285
993	P63276	P63276	40S ribosomal protein S17	Rps17	15.524	9.89451	9		0.0544449	0.969307	0.0778008	32.0099	32.0877	5	5	32.4051	32.7014	32.5155	30.3467	32.0807	32.6327	31.9871	31.633	32.7982	31.3874
994	P63280	P63280	SUMO-conjugating enzyme UBC9	Ube2i	18.007	9.0545	5		0.626269	0.4961	0.699203	29.2908	29.99	5	5	28.7294	29.494	30.8774	28.1667	29.1867	29.3977	30.2097	30.7308	30.4405	29.1716
996	P63321	P63321	Ras-related protein Ral-A	Rala	23.553	8.51816	6		0.40902	0.748612	0.323161	28.4244	28.5621	4	5	27.4968	28.2	28.2778	28.6937	28.5262	27.9881	29.0758	28.9132	27.7362	29.0971
997	P63323	P63323	40S ribosomal protein S12	Rps12	14.525	10.2082	12		1.56535	0.116954	1.21203	33.0528	34.2649	5	5	32.5909	33.4462	34.1285	32.4844	32.6142	34.2808	34.5593	34.614	34.8218	33.0483
998	P63325	P63325	40S ribosomal protein S10	Rps10	18.916	9.68128	13		0.170439	0.879677	0.34514	31.5393	31.8845	5	5	32.2583	33.0514	32.8204	29.2695	30.2972	32.4196	31.3131	31.1408	32.2046	32.3443
999	P63328	P63328	Serine/threonine-protein phosphatase 2B catalytic subunit alpha isoform	Ppp3ca	58.643	8.82615	11		0.916839	0.475051	-0.451989	30.9824	30.5304	5	5	31.2564	31.2954	31.0923	30.5276	30.7402	31.0878	30.3225	29.8645	30.8626	30.5146
1000	P63330	P63330	Serine/threonine-protein phosphatase 2A catalytic subunit alpha isoform	Ppp2ca	35.608	9.36736	12		1.57546	0.315656	-0.502857	32.2931	31.7903	5	5	32.3832	32.3316	32.0079	32.3765	32.3664	31.6345	31.6265	31.3854	31.9212	32.3838
1001	P67778	P67778	Prohibitin	Phb	29.82	8.78843	13		1.6794	0.190393	0.730965	30.0536	30.7846	5	5	29.9373	30.3748	30.4469	29.8455	29.6636	30.9656	30.7069	31.048	31.1747	30.0278
1002	P67871	P67871	Casein kinase II subunit beta	Csnk2b	24.942	8.65923	5		0.53118	0.648694	0.42262	29.1222	29.2792	4	5	29.1242	28.986	29.7434	27.7941	28.635	29.537	29.0178	29.6765	28.6276	29.5368
1003	P67984	P67984	60S ribosomal protein L22	Rpl22	14.759	9.61289	5		0.472955	0.701056	-0.350063	31.0968	30.7467	5	5	30.7648	30.9873	31.2838	30.3803	32.0677	30.7506	30.2517	30.5333	31.4096	30.7883
1004	P68033	P68033	Actin, alpha cardiac muscle 1	Actc1	42.019	10.7718	44		0.0473635	0.981273	-0.0390015	36.787	36.748	5	5	37.4235	37.1075	36.0934	36.9887	36.322	37.0897	36.6984	36.2042	36.8574	36.8905
1005	P68037	P68037	Ubiquitin-conjugating enzyme E2 L3	Ube2l3	17.861	8.86216	6		1.55582	0.0591287	2.47337	28.74	29.9596	3	5	25.9186	25.2925	29.3913	27.9306	28.898	29.0175	30.1229	30.4301	31.2815	28.9458
1006	P68040	P68040	Guanine nucleotide-binding protein subunit beta-2-like 1;Guanine nucleotide-binding protein subunit beta-2-like 1, N-terminally processed	Gnb2l1	35.076	10.34	30		0.0683775	0.970077	-0.0498032	35.7791	35.7293	5	5	35.324	35.4018	35.5447	36.3354	36.2894	35.2747	35.8801	35.9454	36.0234	35.5227
1007	P68134	P68134	Actin, alpha skeletal muscle	Acta1	42.051	9.28457	42		0.294681	0.801792	0.313669	30.7844	31.0981	5	5	31.4625	30.6698	29.7666	31.6764	30.3469	31.5649	31.7362	31.3261	30.3198	30.5435
1009	P68254	P68254	14-3-3 protein theta	Ywhaq	27.778	9.69318	20		0.0172845	0.993881	-0.00759583	32.9673	32.9597	5	5	33.1569	33.1598	33.184	32.8245	32.5112	32.6828	33.0431	33.0753	32.951	33.0464
1010	P68368	P68368	Tubulin alpha-4A chain	Tuba4a	49.924	8.06513	34		0.453399	0.796291	0.193292	28.1811	28.3744	5	5	28.5295	27.8606	27.9361	28.6973	27.882	28.3066	28.4927	28.4851	28.4955	28.092
1011	P68369;P05214;Q3UX10	P68369;P05214	Tubulin alpha-1A chain;Tubulin alpha-3 chain	Tuba1a;Tuba3a	50.135	9.15966	46		0.248236	0.813944	-0.413968	31.4315	31.0175	5	5	33.024	33.14	30.3052	30.1785	30.5098	31.1987	30.8837	31.0166	30.6058	31.3829
1012	P68372	P68372	Tubulin beta-4B chain	Tubb4b	49.83	9.88731	40		0.0103476	0.996932	-0.00590897	34.1745	34.1686	5	5	34.0898	33.8585	33.9548	34.7556	34.2139	34.0017	34.3791	34.4414	34.1866	33.8343
1014	P68433	P68433	Histone H3.1	Hist1h3a	15.404	9.46795	17		0.300215	0.805684	0.288559	29.2534	29.5419	5	5	29.4457	30.341	28.9835	28.1142	29.3827	29.7984	29.843	28.7945	29.715	29.5588
1015	P68510	P68510	14-3-3 protein eta	Ywhah	28.211	9.4675	20		0.128894	0.934838	-0.0861126	32.5563	32.4702	5	5	32.3703	32.1729	32.4723	33.0235	32.7424	31.8583	32.6617	32.7004	32.9927	32.1378
1019	P70168	P70168	Importin subunit beta-1	Kpnb1	97.183	9.16074	34		0.34732	0.835	-0.190782	32.8289	32.6381	5	5	32.7308	33.092	32.9481	32.4984	32.8752	33.1655	32.2946	31.9893	32.9743	32.767
1020	P70186	P70186	Epiphycan	Epyc	36.762	10.7532	31		0.450257	0.743719	0.291882	36.1247	36.4166	5	5	35.7199	35.8542	36.2378	36.7136	36.0983	35.8934	36.4738	36.9903	36.8899	35.8357
1022	P70202	P70202	Latexin	Lxn	25.492	9.51639	8		0.0901903	0.957308	-0.074065	31.515	31.441	5	5	31.9353	31.8049	31.4752	31.7574	30.6024	31.6157	31.6067	31.7739	30.7332	31.4752
1023	P70236	P70236	Dual specificity mitogen-activated protein kinase kinase 6	Map2k6	37.432	8.34001	5		0.188534	0.880011	0.257086	28.7984	29.0555	5	5	29.1995	29.5104	29.5636	27.861	27.8575	29.4837	28.6861	28.0899	28.7372	30.2805
1024	P70255	P70255	Nuclear factor 1 C-type	Nfic	48.768	8.33209	10		0.47733	0.699465	0.352087	29.0616	29.4137	5	5	28.2565	28.7316	30.0188	28.6934	29.6076	29.445	29.0463	29.3342	29.6501	29.5927
1025	P70257	P70257	Nuclear factor 1 X-type	Nfix	53.394	8.83665	12		0.348243	0.882473	0.117494	30.8033	30.9208	5	5	30.6993	30.9157	31.2201	30.3963	30.7851	30.8386	30.8714	31.036	30.7724	31.0854
1026	P70271	P70271	PDZ and LIM domain protein 4	Pdlim4	35.556	8.67248	12		0.621737	0.502293	0.691591	29.682	30.3736	5	5	29.2303	30.5125	30.1952	29.6293	28.8429	29.9743	31.172	31.3733	30.4709	28.8777
1028	P70288	P70288	Histone deacetylase 2	Hdac2	55.302	8.70758	14		0.238438	0.876368	0.187908	30.1623	30.3502	5	5	29.747	29.2521	30.2275	30.7909	30.7943	29.9825	30.5773	30.302	30.6549	30.2344
1029	P70290	P70290	55 kDa erythrocyte membrane protein	Mpp1	52.227	8.0003	8		0.901292	0.496561	-0.419618	28.436	28.0999	5	4	28.2863	28.6543	27.9757	28.4591	28.8044	28.3771	28.2629	28.3518	27.4079	27.6821
1030	P70296	P70296	Phosphatidylethanolamine-binding protein 1;Hippocampal cholinergic neurostimulating peptide	Pebp1	20.83	8.98674	9		0.133977	0.919876	0.111851	30.2116	30.3234	5	5	29.5201	30.6957	30.4804	29.8892	30.4724	30.2865	29.7755	30.3789	31.1484	30.0278
1031	P70297;O88811	P70297	Signal transducing adapter molecule 1	Stam	59.771	7.99395	3		0.0654486	0.958954	-0.120811	28.5189	28.2486	3	4	26.5926	27.7829	28.2427	28.4248	28.8893	27.791	28.9457	29.1529	26.3338	27.1049
1032	P70302	P70302	Stromal interaction molecule 1	Stim1	77.566	8.38625	7		0.468027	0.603945	-0.677663	29.7146	29.6201	5	4	30.1452	30.3148	29.7001	29.5631	28.8498	30.326	29.5427	29.0646	26.7041	29.5472
1033	P70303	P70303	CTP synthase 2	Ctps2	65.514	8.30859	15		0.322912	0.831606	-0.220214	29.7312	29.511	5	5	30.2913	30.4457	29.3358	29.3737	29.2094	29.5814	29.4343	29.1381	29.953	29.448
1034	P70318	P70318	Nucleolysin TIAR	Tial1	43.388	8.44915	6		0.416555	0.831842	0.172624	29.2262	29.3988	5	5	28.8581	29.3214	29.5839	28.8992	29.4684	29.405	29.0864	29.7791	29.2693	29.4542
1035	P70333	P70333	Heterogeneous nuclear ribonucleoprotein H2	Hnrnph2	49.279	8.70086	19		0.400693	0.660131	-0.660284	29.8775	29.777	5	4	29.6052	29.7124	29.4101	29.9494	30.7102	29.8792	26.978	28.2633	30.888	30.0774
1037	P70336	P70336	Rho-associated protein kinase 2	Rock2	160.58	8.01507	19		0.0774156	0.959551	0.0740921	29.8411	29.9152	5	5	30.0956	30.3152	30.3145	28.7802	29.7001	30.1272	29.5368	29.452	29.9453	30.5147
1038	P70349	P70349	Histidine triad nucleotide-binding protein 1	Hint1	13.777	9.40943	7		1.34519	0.190057	1.02584	30.8337	31.8596	5	5	30.2029	30.8195	31.4483	31.3424	30.3555	31.7623	32.3102	32.68	31.9456	30.5997
1039	P70353	P70353	Nuclear transcription factor Y subunit gamma	Nfyc	37.253	8.58058	6		0.728199	0.507827	0.513454	28.1854	28.5881	4	5	28.4518	28.735	28.5508	27.0041	27.6317	28.5474	28.2025	28.6794	28.4643	29.0471
1040	P70362	P70362	Ubiquitin fusion degradation protein 1 homolog	Ufd1l	34.481	7.89688	6		0.504125	0.610837	0.550191	27.3899	27.283	2	5	27.1675	27.6122	26.0847	27.2572	25.5424	26.8043	26.5245	28.2915	27.7883	27.0065
1041	P70372;Q60899;Q61701	P70372	ELAV-like protein 1	Elavl1	36.169	9.90234	23		1.31519	0.630566	0.224003	33.8738	34.0978	5	5	33.7578	33.9028	34.0317	33.8259	33.8511	33.8792	34.0277	34.3983	34.0811	34.1029
1042	P70388	P70388	DNA repair protein RAD50	Rad50	153.49	8.03902	16		0.870253	0.719899	0.198595	29.777	29.9756	5	5	29.7294	30.0231	29.9463	29.6634	29.5227	29.9295	30.0088	29.7072	30.1404	30.0921
1043	P70398	P70398	Probable ubiquitin carboxyl-terminal hydrolase FAF-X	Usp9x	290.71	7.82044	15		0.120007	0.917607	-0.146153	29.6478	29.5017	5	5	29.9862	30.2983	29.0431	29.0548	29.8568	30.9966	29.0163	29.0881	28.975	29.4324
1044	P70399	P70399	Tumor suppressor p53-binding protein 1	Tp53bp1	212.73	7.59069	13		0.555502	0.534889	-0.785165	28.6099	28.7819	5	3	28.7428	28.7703	28.6888	28.2094	28.6385	28.8904	27.2518	25.5265	29.2408	28.2144
1045	P70402	P70402	Myosin-binding protein H	Mybph	52.641	7.96931	4		0.498211	0.699076	0.33427	28.248	28.3411	4	5	28.3132	28.1103	27.042	28.5372	28.0312	28.1833	28.9645	28.365	28.3362	27.8563
1046	P70404	P70404	Isocitrate dehydrogenase [NAD] subunit gamma 1, mitochondrial	Idh3g	42.785	8.90339	11		1.23258	0.58949	0.251159	30.6604	30.9115	5	5	30.5797	30.5489	30.5431	30.7092	30.921	30.6839	30.9655	31.0183	31.1548	30.7351
1048	P70460	P70460	Vasodilator-stimulated phosphoprotein	Vasp	39.666	8.419	9		0.0542468	0.971758	-0.0616837	29.0289	28.9672	5	5	29.5457	29.7752	29.4183	28.4489	27.9563	28.7575	28.9729	29.5231	28.3467	29.2357
1049	Q60817;P70670	Q60817;P70670	Nascent polypeptide-associated complex subunit alpha;Nascent polypeptide-associated complex subunit alpha, muscle-specific form	Naca	23.384	9.10435	5		0.0201236	0.989881	-0.0435051	29.6673	29.6238	5	5	29.6096	29.6976	29.9609	29.9791	29.0892	27.7706	30.4451	31.4303	28.0458	30.427
1051	P70697	P70697	Uroporphyrinogen decarboxylase	Urod	40.691	7.89727	7		0.538579	0.604936	-0.497006	27.2597	26.7856	5	3	27.7247	28.1715	27.2322	25.8121	27.3581	27.4547	26.6967	26.7601	26.3974	26.5046
1052	P70698	P70698	CTP synthase 1	Ctps1	66.682	8.95693	22		0.132602	0.952792	0.0552212	31.7803	31.8355	5	5	32.0835	32.0872	31.685	31.4026	31.643	32.0103	31.6421	31.8252	31.6516	32.0482
1053	P70699	P70699	Lysosomal alpha-glucosidase	Gaa	106.25	8.79061	21		0.419029	0.785648	-0.232612	31.5997	31.3671	5	5	31.2455	31.8378	31.5355	31.6228	31.7567	31.6008	31.4045	30.5001	31.842	31.488
1054	P80313	P80313	T-complex protein 1 subunit eta	Cct7	59.652	9.38338	28		0.142884	0.949848	0.0594292	33.0557	33.1151	5	5	32.9504	32.9286	32.9584	33.2619	33.179	33.0058	32.8383	33.0059	33.6736	33.0519
1055	P80314	P80314	T-complex protein 1 subunit beta	Cct2	57.477	9.67292	46		0.253446	0.905323	0.0923813	34.1245	34.2168	5	5	34.0064	33.8488	34.1081	34.5311	34.1279	33.8364	34.3412	34.3983	34.3043	34.2039
1056	P80315	P80315	T-complex protein 1 subunit delta	Cct4	58.066	9.5647	40		0.0210281	0.994492	0.0124611	33.8974	33.9099	5	5	33.743	33.7055	33.9418	33.9504	34.1464	33.7726	33.7527	33.5942	34.6472	33.7827
1057	P80316	P80316	T-complex protein 1 subunit epsilon	Cct5	59.623	9.79871	47		0.0577912	0.980464	0.0325333	34.5234	34.5559	5	5	34.3295	34.2191	34.3964	34.9958	34.6761	34.2524	34.427	34.7877	34.9971	34.3155
1058	P80317	P80317	T-complex protein 1 subunit zeta	Cct6a	58.004	9.82402	34		0.473145	0.838023	0.148941	34.3393	34.4883	5	5	34.2998	34.1367	34.4049	34.4769	34.3784	34.3451	34.4936	34.342	35.0009	34.2599
1059	P80318	P80318	T-complex protein 1 subunit gamma	Cct3	60.629	9.53671	44		1.04088	0.760927	-0.159148	33.7846	33.6255	5	5	33.6322	33.7551	33.8451	33.7537	33.9369	33.5478	33.4627	33.5859	33.8432	33.6878
1061	P82198	P82198	Transforming growth factor-beta-induced protein ig-h3	Tgfbi	74.596	10.0634	38		0.00871995	0.995209	0.00245209	35.4465	35.449	5	5	35.7667	35.3205	35.4519	35.2932	35.4004	35.4016	35.501	35.4391	35.3233	35.5798
1062	P82347	P82347	Delta-sarcoglycan	Sgcd	32.133	8.49094	8		0.0399286	0.986867	-0.0257122	29.3612	29.3355	5	5	29.2082	29.5369	29.3495	29.114	29.5975	29.4587	29.0654	28.678	29.6882	29.7872
1064	P83741;Q80UE6	P83741	Serine/threonine-protein kinase WNK1	Wnk1	250.93	7.13408	3		0.36745	0.793357	0.253909	26.9192	NaN	4	0	26.6483	27.2994	27.4134	26.3156	26.021	26.8445	26.9372	26.7664	26.8803	27.5387
1065	P83870	P83870	PHD finger-like domain-containing protein 5A	Phf5a	12.405	9.56037	9		0.290506	0.83336	0.24568	31.793	32.0387	5	5	31.5295	31.6569	32.1306	31.8551	31.7929	31.5309	32.475	32.9279	32.2576	31.002
1066	P83882	P83882	60S ribosomal protein L36a	Rpl36a	12.441	9.92215	6		0.32814	0.786075	0.323239	31.6919	32.0151	5	5	32.2433	32.386	31.7094	30.3031	31.8176	32.6041	31.4528	31.7782	31.8399	32.4007
1067	P83887;Q8VCK3	P83887;Q8VCK3	Tubulin gamma-1 chain;Tubulin gamma-2 chain	Tubg1;Tubg2	51.1	8.10592	9		1.27295	0.401405	-0.463066	28.5949	28.1319	5	5	28.3025	28.6493	28.9811	28.3232	28.7185	28.2666	28.0643	27.6444	28.0584	28.6255
1068	P83917	P83917	Chromobox protein homolog 1	Cbx1	21.418	8.48166	5		0.531701	0.544426	0.846403	27.9707	28.5703	4	5	27.4421	26.7366	28.3147	28.8144	27.3114	28.4049	30.2017	29.859	27.6681	26.7175
1069	P83940	P83940	Transcription elongation factor B polypeptide 1	Tceb1	12.473	9.82049	8		1.15428	0.397086	0.518079	32.1969	32.715	5	5	31.7992	31.8417	32.6244	32.7103	32.0089	32.7722	32.87	33.1294	32.5867	32.2167
1070	P84084	P84084	ADP-ribosylation factor 5	Arf5	20.529	8.65439	9		0.412818	0.818626	-0.184282	29.3173	29.133	5	5	29.4408	29.5478	29.1677	29.3229	29.1072	29.5359	29.3916	29.0807	28.4697	29.187
1071	P84089	P84089	Enhancer of rudimentary homolog	Erh	12.259	9.33207	4		1.44002	0.148578	1.14099	29.7358	30.8767	5	5	29.237	30.0765	30.6913	29.474	29.2	30.4794	31.642	31.7439	30.6036	29.9147
1072	P84091	P84091	AP-2 complex subunit mu	Ap2m1	49.654	8.8806	18		0.059556	0.971506	-0.0466064	31.1546	31.108	5	5	31.0722	31.6328	31.3682	30.3742	31.3253	31.462	30.6604	30.9081	30.9095	31.5997
1073	P84096;Q8R527;Q9ER71	P84096	Rho-related GTP-binding protein RhoG	Rhog	21.308	8.32901	7		0.119258	0.95099	-0.063319	28.0267	28.1072	5	4	28.311	28.1297	27.8917	27.7321	28.0692	28.2807	27.3881	27.958	27.8335	28.3567
1074	P84099	P84099	60S ribosomal protein L19	Rpl19	23.466	9.98062	20		0.250511	0.833777	0.322797	32.296	32.6188	5	5	32.7791	33.3916	31.925	30.7743	32.6098	32.9379	32.2153	31.6694	33.1434	33.1278
1075	P84104	P84104	Serine/arginine-rich splicing factor 3	Srsf3	19.329	9.80222	10		0.668131	0.662947	0.292512	32.0206	32.3131	5	5	31.833	32.1632	32.7033	31.5882	31.8154	32.0057	32.2882	32.3316	32.6232	32.3169
1076	P84228	P84228	Histone H3.2	Hist1h3b	15.388	11.2744	17		0.492005	0.687283	0.368081	36.0971	36.4652	5	5	36.1834	36.7904	36.3144	34.8051	36.3924	36.711	36.4684	36.3514	36.5691	36.2262
1077	P97298;CON__Q95121	P97298	Pigment epithelium-derived factor	Serpinf1	46.233	8.83829	12		0.220117	0.878853	0.195944	30.6019	30.7979	5	5	30.8076	30.8441	30.4092	30.1441	30.8046	29.6989	30.3504	31.2061	31.3677	31.3662
1079	P97300	P97300	Neuroplastin	Nptn	44.373	8.72095	7		0.330485	0.838634	-0.194761	30.5122	30.3174	5	5	29.987	30.4234	30.3888	30.9041	30.8574	30.5776	30.8593	30.0948	29.7523	30.3029
1080	P97310	P97310	DNA replication licensing factor MCM2	Mcm2	102.08	9.20003	29		0.0705032	0.978658	0.0319	33.0318	33.0637	5	5	32.9446	33.1545	33.3336	32.6713	33.0552	32.7493	32.9791	32.9187	33.4227	33.249
1081	P97311	P97311	DNA replication licensing factor MCM6	Mcm6	92.866	9.30183	42		0.0894263	0.971734	-0.0347763	33.604	33.5692	5	5	33.34	33.3691	33.6968	33.843	33.7713	33.2888	33.5184	33.5026	33.8807	33.6557
1082	P97314	P97314	Cysteine and glycine-rich protein 2	Csrp2	20.926	9.00788	7		0.154693	0.919545	0.0938126	30.5167	30.6105	5	5	30.7074	30.3854	30.4896	30.671	30.3299	30.215	30.9783	31.2624	30.4995	30.0971
1083	P97315	P97315	Cysteine and glycine-rich protein 1	Csrp1	20.583	9.69276	14		0.550178	0.72394	0.262514	32.7114	32.9739	5	5	32.7677	32.284	33.1254	32.9941	32.3858	33.0097	33.082	33.4799	32.7241	32.5739
1084	P97346	P97346	Nucleoredoxin	Nxn	48.343	8.20252	7		0.0850062	0.967314	-0.0494003	28.771	28.7216	5	5	28.6379	28.8771	28.2815	29.1082	28.9503	28.3915	28.6906	28.4854	29.2913	28.7493
1085	P97351	P97351	40S ribosomal protein S3a	Rps3a	29.885	10.0379	29		0.499091	0.742317	0.271265	34.1789	34.4501	5	5	34.1345	34.6777	34.4515	33.3122	34.3184	34.6262	34.0926	34.4315	34.6409	34.4594
1087	P97370	P97370	Sodium/potassium-transporting ATPase subunit beta-3	Atp1b3	31.775	8.27434	5		0.372252	0.688056	-0.654792	28.8475	27.6814	3	4	28.8969	29.1017	28.544	26.5444	27.526	28.3942	26.9704	26.0081	26.6134	29.3529
1088	P97371	P97371	Proteasome activator complex subunit 1	Psme1	28.673	7.83291	3		1.30252	0.308401	0.616535	26.8741	27.3858	4	4	26.4223	26.7833	27.7867	26.66	26.6274	27.1217	27.5992	27.3409	27.4815	27.8191
1089	P97372	P97372	Proteasome activator complex subunit 2	Psme2	27.057	8.85687	9		1.1173	0.47443	0.401585	30.2206	30.6221	5	5	29.6674	30.188	30.3654	30.3792	30.5028	30.446	30.737	30.344	31.0811	30.5027
1092	P97379	P97379	Ras GTPase-activating protein-binding protein 2	G3bp2	54.087	8.78827	15		0.201434	0.909887	-0.101168	30.7557	30.6545	5	5	31.0388	30.74	31.1169	30.4629	30.4199	30.7311	30.687	31.0899	30.5506	30.214
1093	P97384	P97384	Annexin A11	Anxa11	54.079	9.28053	22		0.0107194	0.996475	0.00799332	32.172	32.18	5	5	32.3172	31.8877	32.5636	31.8832	32.2086	32.4816	32.4767	32.1091	32.4742	31.3585
1094	P97386	P97386	DNA ligase 3	Lig3	113.07	7.40199	9		0.299682	0.775013	0.445212	27.5073	NaN	4	0	27.5727	28.0634	27.6221	24.6459	26.771	27.2288	27.2941	28.0291	27.332	27.0171
1095	P97393	P97393	Rho GTPase-activating protein 5	Arhgap5	172.11	6.96867	5		0.361918	0.792866	-0.256079	26.9903	NaN	5	0	27.0666	26.9809	27.0507	26.7186	27.1346	26.6848	27.7493	25.9745	26.9496	26.3127
1097	P97429	P97429	Annexin A4	Anxa4	35.915	8.50579	11		0.549571	0.651958	0.386388	29.5734	29.9598	5	5	29.0685	28.9012	30.3003	30.0643	29.5328	29.9836	29.9944	30.058	30.4913	29.2717
1098	P97434	P97434	Myosin phosphatase Rho-interacting protein	Mprip	116.41	7.65798	6		0.0258299	0.989856	0.0181816	28.3743	28.3925	5	5	28.3796	28.5387	29.0488	28.2175	27.6869	28.5121	28.6227	28.0388	28.3165	28.4723
1099	P97443	P97443	Histone-lysine N-methyltransferase Smyd1	Smyd1	56.495	8.41338	7		0.564391	0.490379	0.980153	29.565	29.7611	4	5	30.1004	29.5326	29.0809	29.5463	25.6445	30.4006	30.077	29.105	29.7584	29.4644
1100	P97447	P97447	Four and a half LIM domains protein 1	Fhl1	31.888	10.3092	29		0.588022	0.682393	0.30613	35.0525	35.3586	5	5	35.7805	34.9919	34.968	34.8869	34.6352	35.8028	35.5005	35.52	34.9919	34.9781
1103	P97452	P97452	Ribosome biogenesis protein BOP1	Bop1	82.545	7.65654	5		0.196446	0.894081	-0.172895	27.6795	27.7102	5	4	27.3155	27.4954	27.1763	27.7144	28.6958	26.6922	27.6662	27.4024	28.0118	27.7603
1104	P97454;P70340;Q9JIW5	P97454;P70340;Q9JIW5	Mothers against decapentaplegic homolog 5;Mothers against decapentaplegic homolog 1;Mothers against decapentaplegic homolog 9	Smad5;Smad1;Smad9	52.172	8.25477	6		0.100203	0.941046	0.108919	28.7431	28.852	5	5	29.4519	29.5438	28.3326	28.2606	28.1267	28.4921	28.7029	28.4004	28.8269	29.838
1105	P97457	P97457	Myosin regulatory light chain 2, skeletal muscle isoform	Mylpf	18.955	9.94205	16		0.731331	0.417138	0.972675	32.6438	33.6165	5	5	34.1759	33.4176	32.7945	31.8121	31.0191	34.4927	33.9809	33.9641	33.2921	32.3527
1106	P97461	P97461	40S ribosomal protein S5;40S ribosomal protein S5, N-terminally processed	Rps5	22.889	9.46764	11		0.114515	0.918487	0.173507	31.4794	31.6529	5	5	32.2047	32.3045	32.1532	29.9854	30.7493	32.4476	31.1396	30.8352	32.3351	31.507
1109	P97471	P97471	Mothers against decapentaplegic homolog 4	Smad4	60.341	8.39187	10		0.43215	0.793281	0.208857	29.1225	29.3313	5	5	29.2641	29.0236	28.7948	29.3356	29.1942	28.8072	29.8398	29.6706	29.3661	28.9729
1110	P97496	P97496	SWI/SNF complex subunit SMARCC1	Smarcc1	122.89	8.46052	22		0.0284163	0.989983	0.0283516	30.7147	30.7431	5	5	30.8192	31.458	31.2272	30.4802	29.5889	30.5704	30.9377	31.0613	30.6617	30.4842
1111	P97760	P97760	DNA-directed RNA polymerase II subunit RPB3	Polr2c	31.443	8.03547	6		0.230749	0.839557	0.348312	28.5528	28.3667	2	4	26.2566	27.3089	27.3734	28.5284	28.5773	26.3192	28.8924	28.0765	28.4861	28.0119
1113	P97807	P97807	Fumarate hydratase, mitochondrial	Fh	54.356	8.79684	13		0.767677	0.635359	0.298485	30.7946	31.0931	5	5	31.1389	30.8576	30.9126	30.9944	30.0697	30.9361	31.1839	31.2375	30.9356	31.1726
1114	P97820	P97820	Mitogen-activated protein kinase kinase kinase kinase 4	Map4k4	140.6	8.21093	11		0.323176	0.738615	-0.605892	30.2651	30.4356	5	4	30.8329	30.4307	30.1235	29.9249	30.0133	30.9436	30.5452	30.1995	26.5534	30.0543
1116	P97822	P97822	Acidic leucine-rich nuclear phosphoprotein 32 family member E	Anp32e	29.622	8.85446	6		1.2954	0.194906	1.0411	29.065	30.1061	5	5	28.4953	28.1447	29.9418	28.9237	29.8194	29.7834	30.524	30.3275	30.7219	29.1736
1118	P97855	P97855	Ras GTPase-activating protein-binding protein 1	G3bp1	51.828	9.26259	15		0.358263	0.862563	0.153388	32.1111	32.2645	5	5	31.996	32.2369	32.5772	31.6293	32.1161	32.0712	32.2367	32.3803	32.6101	32.0244
1119	P97863	P97863	Nuclear factor 1 B-type	Nfib	63.506	8.48414	9		1.49092	0.334751	0.502747	29.6436	30.1463	5	5	29.5389	30.1352	29.6694	29.4017	29.4728	30.0313	29.714	30.2157	30.6039	30.1667
1122	P97927	P97927	Laminin subunit alpha-4	Lama4	201.82	8.89579	51		0.00966295	0.99495	-0.00285416	32.9805	32.9777	5	5	32.8578	33.1374	33.0964	32.9491	32.8621	32.9043	32.9542	32.7391	33.0618	33.2291
1123	P97930	P97930	Thymidylate kinase	Dtymk	23.914	8.54376	7		0.113066	0.917925	0.185725	29.2158	29.4016	5	5	29.478	29.9344	27.5321	29.269	29.8658	30.4257	28.6095	30.4407	28.4623	29.0696
1124	P98063	P98063	Bone morphogenetic protein 1	Bmp1	111.67	8.02309	5		0.325997	0.832056	-0.214351	29.3768	29.1624	5	5	29.5889	29.7609	29.7352	28.549	29.2496	29.3932	29.2516	28.4813	29.3242	29.3617
1125	P98078	P98078	Disabled homolog 2	Dab2	82.311	8.64161	6		0.819041	0.554752	0.383467	30.5299	30.9133	5	5	30.8598	30.8706	30.7184	30.3446	29.8559	30.6224	31.1985	30.8856	30.5732	31.2869
1128	P99024	P99024	Tubulin beta-5 chain	Tubb5	49.67	10.6464	40		0.0857587	0.969273	-0.0423653	36.4467	36.4044	5	5	36.2777	36.1871	36.2148	36.8402	36.7138	36.0865	36.4264	36.6077	36.7075	36.1936
1129	P99026	P99026	Proteasome subunit beta type-4	Psmb4	29.116	8.13691	4	+	2.44708	0.0164706	1.99287	NaN	28.5762	0	4	27.2088	26.3039	26.0775	25.4114	26.1512	28.1307	28.9911	28.9567	26.8124	28.2262
1130	P99027	P99027	60S acidic ribosomal protein P2	Rplp2	11.651	9.76587	5		0.792652	0.413071	0.818501	31.3635	32.182	5	5	30.8642	31.4771	32.4758	31.3209	30.6793	32.2446	32.6381	32.9818	32.5052	30.5401
1131	P99028	P99028	Cytochrome b-c1 complex subunit 6, mitochondrial	Uqcrh	10.435	8.188	2		1.64734	0.101469	1.30779	NaN	27.8539	0	5	27.9196	25.8715	26.3807	26.9911	25.5677	28.5692	27.8387	27.3609	27.7089	27.7918
1132	P99029	P99029	Peroxiredoxin-5, mitochondrial	Prdx5	21.897	8.48329	7		1.1077	0.216144	1.23311	28.3264	29.5595	5	5	27.7056	27.7022	29.7514	27.858	28.6149	29.6757	29.8997	30.5111	29.9321	27.7791
1135	Q00493	Q00493	Carboxypeptidase E	Cpe	53.255	7.68475	6		1.6742	0.110519	-1.18157	27.9545	NaN	5	0	27.5455	27.6893	28.0194	28.6658	27.8525	27.9389	25.7528	26.8992	26.3176	26.956
1136	Q00612;P97324;REV__P46662	Q00612	Glucose-6-phosphate 1-dehydrogenase X	G6pdx	59.262	8.93675	22		0.0698386	0.977822	-0.0331573	31.7439	31.7107	5	5	31.4287	31.4643	31.648	32.196	31.9825	31.6788	31.7198	31.4763	31.9984	31.6804
1137	Q00623;CON__P15497	Q00623	Apolipoprotein A-I;Proapolipoprotein A-I;Truncated apolipoprotein A-I	Apoa1	30.615	9.57553	24		0.949651	0.347558	0.818183	32.1619	32.9801	5	5	32.6049	33.0399	32.3136	31.1054	31.7456	33.4202	32.7468	32.58	33.9431	32.2103
1138	Q00724	Q00724	Retinol-binding protein 4	Rbp4	23.206	8.55178	7		0.0755668	0.958525	-0.0821976	28.7636	28.6814	5	5	29.3487	29.2066	28.3324	28.9849	27.9454	28.5546	28.2427	28.1968	28.623	29.7898
1139	Q00897;P22599	Q00897;P22599	Alpha-1-antitrypsin 1-4;Alpha-1-antitrypsin 1-2	Serpina1d;Serpina1b	45.998	8.03391	6		2.45989	0.0560825	-0.986441	27.9989	NaN	5	0	27.8719	28.2684	27.4391	28.215	28.2001	27.2501	27.3078	27.1101	26.2972	27.097
1141	Q00899;Q3TTC2	Q00899	Transcriptional repressor protein YY1	Yy1	44.716	8.76533	11		0.596653	0.655885	0.338165	30.0517	30.3898	5	5	30.6492	30.412	30.2294	29.511	29.4566	30.2858	30.2964	30.5841	30.7696	30.0132
1142	Q00915	Q00915	Retinol-binding protein 1	Rbp1	15.846	8.54334	8		0.987283	0.271732	-1.14276	28.9222	28.1932	5	4	27.8758	28.23	28.5795	30.137	29.7884	27.8449	26.124	28.3175	27.9845	28.626
1143	Q00PI9	Q00PI9	Heterogeneous nuclear ribonucleoprotein U-like protein 2	Hnrnpul2	84.939	9.42693	33		0.218379	0.903885	-0.110113	33.5549	33.4448	5	5	33.0615	33.3757	33.5985	33.7457	33.9931	33.0418	33.6173	33.397	33.804	33.3637
1145	Q01149	Q01149	Collagen alpha-2(I) chain	Col1a2	129.56	9.71302	32		0.0274606	0.988901	-0.0335228	35.2487	35.2151	5	5	35.813	35.6415	35.2035	35.7638	33.8215	35.3334	35.0809	35.1444	34.6441	35.8728
1147	Q01320	Q01320	DNA topoisomerase 2-alpha	Top2a	172.79	7.92233	31		0.111908	0.925959	-0.135559	29.4941	29.3585	5	5	29.314	29.8441	30.0379	28.6638	29.6108	29.9496	28.512	29.1315	30.5309	28.6686
1148	Q01339;CON__P17690	Q01339	Beta-2-glycoprotein 1	Apoh	38.618	8.42537	10		0.31114	0.811913	0.265218	29.4538	29.719	5	5	29.4696	29.942	29.135	29.8354	28.887	29.8387	29.7876	30.5736	28.6645	29.7306
1149	Q01405	Q01405	Protein transport protein Sec23A	Sec23a	86.161	9.43627	35		0.823502	0.590292	-0.323291	33.7009	33.3776	5	5	33.7514	33.9174	33.6877	33.3291	33.8187	33.5451	33.4526	32.7278	33.3754	33.7869
1150	Q01730	Q01730	Ras suppressor protein 1	Rsu1	31.55	8.95669	11		1.04989	0.337722	0.736615	30.141	30.8776	5	5	30.6441	30.7218	30.7636	29.2153	29.3603	30.6694	31.0989	31.0645	31.1709	30.3845
1151	Q01768	Q01768	Nucleoside diphosphate kinase B	Nme2	17.363	9.4558	11		1.43783	0.324807	0.532721	31.7573	32.2901	5	5	31.4627	31.6063	32.1411	31.3652	32.2115	32.0556	32.2102	32.5111	32.6291	32.0443
1152	Q01853	Q01853	Transitional endoplasmic reticulum ATPase	Vcp	89.321	9.91885	72		0.4261	0.868546	-0.125776	35.5379	35.4121	5	5	35.3816	35.4337	35.3749	35.8496	35.6498	35.0909	35.3519	35.6165	35.3947	35.6067
1154	Q02053;P31254	Q02053	Ubiquitin-like modifier-activating enzyme 1	Uba1	117.81	9.55283	52		0.481263	0.864736	-0.124735	34.6141	34.4893	5	5	34.4897	34.5006	34.4767	34.8977	34.7055	34.4265	34.5164	34.2655	34.7994	34.4389
1155	Q02105	Q02105	Complement C1q subcomponent subunit C	C1qc	25.991	9.04999	5		0.326231	0.825458	-0.225286	30.8682	30.6429	5	5	30.4448	30.5186	31.032	30.9562	31.3895	30.8613	30.9201	30.6748	31.053	29.7056
1156	Q02248;Q02257	Q02248	Catenin beta-1	Ctnnb1	85.47	8.38664	15		0.134148	0.934544	-0.0842808	30.3252	30.241	5	5	30.2156	30.5715	30.3949	30.2551	30.1891	30.6678	29.9383	29.5615	30.8005	30.2367
1160	Q02788	Q02788	Collagen alpha-2(VI) chain	Col6a2	110.33	10.311	57		0.609911	0.760341	-0.206169	36.9712	36.765	5	5	37.281	36.9353	36.5131	37.3559	36.7708	36.8722	36.8604	36.6426	36.6647	36.7852
1161	Q02819	Q02819	Nucleobindin-1	Nucb1	53.408	7.68556	9		0.24577	0.807357	0.462668	28.093	27.6522	3	5	28.0785	28.2253	27.9753	26.2673	25.4012	27.1047	29.4108	28.294	26.8116	26.6398
1163	Q03173	Q03173	Protein enabled homolog	Enah	85.843	8.32952	6		0.126827	0.946149	0.069521	29.4222	29.4918	5	5	29.3542	29.8923	29.5418	29.5881	28.7348	29.2279	29.6329	29.6564	29.4099	29.5317
1164	Q03265	Q03265	ATP synthase subunit alpha, mitochondrial	Atp5a1	59.752	10.2444	55		2.16387	0.376476	0.353763	35.7647	36.1185	5	5	35.7288	35.5886	35.9672	35.6733	35.8658	36.1677	36.055	36.2946	36.1947	35.8805
1166	Q03350	Q03350	Thrombospondin-2	Thbs2	129.88	9.24137	43		0.137316	0.963619	0.0386497	33.1388	33.1774	5	5	33.2145	32.8874	33.1294	33.2993	33.1634	32.8472	33.2636	33.2688	33.2491	33.2584
1167	Q04207	Q04207	Transcription factor p65	Rela	60.211	8.37834	7		0.374177	0.770376	0.300754	29.0435	29.3442	5	5	29.5064	29.0861	29.2537	29.0576	28.3136	29.6103	29.9513	29.8326	28.4049	28.922
1169	Q04736;P06240;P25911;P14234;P08103	Q04736	Tyrosine-protein kinase Yes	Yes1	60.629	8.36545	10		0.279817	0.874605	-0.160577	29.6513	29.4908	5	5	29.8093	29.2065	29.8356	29.5881	29.8172	28.8921	29.3242	29.6078	30.182	29.4477
1170	Q04750;Q8R4U6	Q04750	DNA topoisomerase 1	Top1	90.875	8.98421	27		0.216041	0.913394	-0.0880566	32.1237	32.0357	5	5	31.9794	32.3492	31.8295	32.0471	32.4136	32.0735	31.71	32.1836	31.8254	32.386
1171	Q04857	Q04857	Collagen alpha-1(VI) chain	Col6a1	108.49	10.4311	72		0.0418314	0.991161	-0.017659	37.3725	37.3548	5	5	37.6682	37.2885	37.022	37.7105	37.1731	37.2946	37.5073	37.4848	37.2533	37.234
1175	Q05186	Q05186	Reticulocalbin-1	Rcn1	38.113	9.79468	18		1.27879	0.274447	0.698604	33.1043	33.8029	5	5	33.0417	33.0575	33.8201	32.8657	32.7366	33.7759	34.0276	34.2932	34.0291	32.8889
1176	Q05306	Q05306	Collagen alpha-1(X) chain	Col10a1	66.775	7.79978	6		0.834267	0.424453	-0.703194	28.588	28.225	5	4	29.1644	28.8696	27.7695	28.2812	28.8553	28.1765	26.5239	27.9481	28.133	28.6425
1177	Q05722	Q05722	Collagen alpha-1(IX) chain	Col9a1	92.091	9.48343	27		0.302748	0.88327	-0.126842	34.1452	34.0183	5	5	34.3268	34.2917	34.3581	33.678	34.0712	34.1926	33.9287	33.6348	33.9614	34.3741
1178	Q05793	Q05793	Basement membrane-specific heparan sulfate proteoglycan core protein;Endorepellin;LG3 peptide	Hspg2	398.29	10.2396	182		1.09452	0.655886	-0.220007	38.3368	38.1168	5	5	38.479	38.2316	38.2137	38.4257	38.3339	38.1726	38.1628	37.7401	38.2174	38.2908
1179	Q05816;REV__Q9D2U9;REV__Q8CGP2;REV__Q8CGP0;REV__Q64525;REV__Q64524;REV__Q64475;REV__P10854;REV__P70696	Q05816	Fatty acid-binding protein, epidermal	Fabp5	15.137	9.47381	9		0.0575305	0.970358	0.0610264	31.314	31.375	5	5	30.4134	30.7688	31.394	32.1081	31.8856	30.7812	31.8112	31.8118	31.3395	31.1314
1180	Q05895	Q05895	Thrombospondin-3	Thbs3	104.12	9.81544	35		0.346918	0.898118	-0.0970383	34.7014	34.6044	5	5	34.587	34.4428	35.0325	34.7439	34.7009	34.7316	34.7069	34.3237	34.6191	34.6407
1181	Q05920	Q05920	Pyruvate carboxylase, mitochondrial	Pc	129.68	7.95389	15		0.210951	0.901447	-0.120692	29.4309	29.3103	5	5	29.2184	28.9763	29.0866	30.0628	29.8108	29.1505	29.5542	29.1373	29.2266	29.4828
1183	Q05CL8;REV__Q9QZ47	Q05CL8	La-related protein 7	Larp7	64.802	7.79343	6		0.0764126	0.958593	-0.0953735	27.8585	28.2775	4	2	27.2523	28.389	27.8257	27.3825	27.8367	27.8249	27.384	26.266	28.0044	28.73
1184	Q05D44	Q05D44	Eukaryotic translation initiation factor 5B	Eif5b	137.61	8.74992	36		0.112264	0.96999	-0.0347908	31.7502	31.7154	5	5	31.6585	31.8163	31.7878	31.7622	31.7262	31.9324	31.7546	31.4233	31.9787	31.4879
1185	Q06138	Q06138	Calcium-binding protein 39	Cab39	39.842	8.16209	7		1.78721	0.0598039	-1.59828	28.8862	NaN	4	0	28.8749	29.3279	28.9147	28.4273	26.4586	26.3052	26.6674	26.9445	27.1885	26.9065
1186	Q06180	Q06180	Tyrosine-protein phosphatase non-receptor type 2	Ptpn2	47.36	8.11998	5		0.456613	0.785748	-0.211107	28.7064	28.4953	5	5	28.6943	29.0692	29.0267	28.2576	28.4843	28.6896	28.2091	28.1839	28.9414	28.4526
1190	Q07076	Q07076	Annexin A7	Anxa7	49.925	8.94382	16		0.0302024	0.991242	-0.0222378	31.1569	31.1347	5	5	31.2017	30.7108	31.0947	31.5001	31.2773	31.0196	31.371	31.1631	31.7265	30.3933
1192	Q07113	Q07113	Cation-independent mannose-6-phosphate receptor	Igf2r	273.81	9.38888	90		0.135575	0.953421	-0.0537796	35.1512	35.0974	5	5	34.9317	35.0604	35.1543	35.2134	35.396	35.3212	35.1559	34.6398	35.0106	35.3594
1193	Q07231	Q07231	Zinc finger and SCAN domain-containing protein 21	Zscan21	63.012	7.95115	4		0.0836814	0.959677	-0.0632629	28.7168	28.6536	5	5	28.7745	28.1586	29.3562	28.9577	28.3373	28.237	28.6509	29.2555	28.4037	28.7208
1194	Q07235	Q07235	Glia-derived nexin	Serpine2	44.207	9.45491	20		0.0376609	0.987298	0.0343754	32.7464	32.7808	5	5	32.7391	33.26	32.7495	31.7978	33.1858	32.6343	32.1602	32.9458	33.2665	32.8972
1195	Q07417	Q07417	Short-chain specific acyl-CoA dehydrogenase, mitochondrial	Acads	44.889	9.03985	16		0.961867	0.563768	-0.323224	31.561	31.2378	5	5	31.607	31.5504	31.2232	31.7719	31.6527	31.1062	30.993	30.919	31.4217	31.7491
1197	Q07643	Q07643	Collagen alpha-2(IX) chain	Col9a2	65.321	8.92505	3		0.22009	0.881561	-0.183996	32.0458	31.8618	5	5	31.9343	31.641	31.903	32.9044	31.8465	31.0817	32.4709	32.3758	31.5745	31.8062
1198	Q07646	Q07646	Mesoderm-specific transcript protein	Mest	38.907	9.01385	7		0.312397	0.709579	-0.973755	29.4883	28.5146	5	5	31.37	32.025	26.9456	28.8424	28.2586	29.3353	29.0093	26.8737	26.0601	31.2944
1199	Q08024	Q08024	Core-binding factor subunit beta	Cbfb	22.03	9.51152	7		1.48851	0.227	0.705864	31.107	31.8129	5	5	31.5113	31.6286	31.3207	30.6552	30.4192	31.6465	31.4075	32.0157	32.128	31.8667
1207	Q08775;Q64131	Q08775;Q64131	Runt-related transcription factor 2;Runt-related transcription factor 3	Runx2;Runx3	66.204	7.78159	4	+	2.13338	0.0298947	-1.70988	27.9235	NaN	5	0	27.1968	27.7242	28.316	27.5299	28.8509	26.7198	26.4124	24.7247	26.7573	26.4541
1208	Q08857	Q08857	Platelet glycoprotein 4	Cd36	52.697	7.93282	4		0.287333	0.784449	-0.426997	27.6899	NaN	4	0	27.9357	29.1809	26.8747	27.1083	26.7682	27.5161	28.3649	27.5563	26.3003	25.9952
1209	Q08879;CON__ENSEMBL:ENSBTAP00000016046	Q08879	Fibulin-1	Fbln1	78.032	9.17225	17		1.41475	0.47721	0.321452	32.3723	32.6937	5	5	32.4677	32.3163	32.1744	32.3733	32.5298	32.4446	32.9087	33.0238	32.5625	32.5292
1210	Q08943	Q08943	FACT complex subunit SSRP1	Ssrp1	80.859	9.30079	34		0.277569	0.910172	-0.08181	32.9742	32.8924	5	5	32.707	32.8681	32.9714	33.207	33.1177	33.0533	33.0595	32.8939	32.5832	32.8721
1211	Q09163	Q09163	Protein delta homolog 1;Fetal antigen 1	Dlk1	41.32	9.00342	9		0.163534	0.914898	-0.107851	30.9559	30.848	5	5	31.3888	31.1619	31.1002	30.2992	30.8293	31.1532	31.1752	30.7451	30.2118	30.9549
1214	Q0P678	Q0P678	Zinc finger CCCH domain-containing protein 18	Zc3h18	105.69	8.17146	6		0.212905	0.904035	0.122262	29.5813	29.7036	5	5	29.509	28.9126	29.6317	30.0683	29.7849	30.0948	29.4102	29.8542	29.7376	29.4211
1216	Q0VGB7	Q0VGB7	Serine/threonine-protein phosphatase 4 regulatory subunit 2	Ppp4r2	46.478	8.4933	10		0.0159109	0.992446	0.0104061	29.719	29.7294	5	5	29.4044	29.2054	30.0115	29.9117	30.0621	29.9429	29.8381	30.0018	29.6428	29.2215
1218	Q11011	Q11011	Puromycin-sensitive aminopeptidase	Npepps	103.32	8.25227	14	+	2.25352	0.030961	-1.49195	30.54	29.048	5	5	30.4279	30.1492	30.6815	30.2279	31.2134	29.6309	28.2239	29.231	28.2508	29.9035
1220	Q1HFZ0	Q1HFZ0	tRNA (cytosine(34)-C(5))-methyltransferase	Nsun2	85.451	8.73136	26		0.123581	0.953363	0.0565479	31.4708	31.5273	5	5	31.0499	31.2927	31.6312	31.4782	31.9018	31.3853	31.3312	31.5804	31.8661	31.4735
1221	Q1XH17	Q1XH17	Tripartite motif-containing protein 72	Trim72	52.816	8.66212	17		0.221298	0.86003	0.293426	30.1506	30.444	5	5	31.1553	31.1659	29.3459	30.4207	28.6649	31.0111	29.9651	30.2555	30.1458	30.8424
1223	Q91VK1;Q2L4X1	Q91VK1;Q2L4X1	Basic leucine zipper and W2 domain-containing protein 2	Bzw2	48.063	7.71608	4	+	2.7749	0.0234375	-1.23733	27.8581	NaN	4	0	27.8486	27.7202	28.1108	27.7527	27.6334	26.3778	26.3342	26.4695	27.5676	26.1299
1227	Q2YDW2	Q2YDW2	Protein misato homolog 1	Msto1	61.23	7.21136	3		0.466422	0.792982	0.201248	26.5481	NaN	5	0	26.642	26.5251	26.1495	26.5716	26.8521	27.152	26.5921	26.9386	26.8592	26.2047
1229	Q3B7Z2;Q5QNQ6	Q3B7Z2	Oxysterol-binding protein 1	Osbp	88.796	8.74738	22		0.536293	0.774512	-0.202176	31.5492	31.347	5	5	31.2652	31.4405	31.581	31.7716	31.6878	31.3519	31.2764	30.9236	31.8858	31.2975
1232	Q3TCH7	Q3TCH7	Cullin-4A	Cul4a	87.752	7.97778	12		0.142204	0.924763	0.093261	28.8707	28.964	5	5	29.2619	29.0794	29.2348	28.5478	28.2296	29.3922	28.532	29.1299	28.8009	28.9647
1235	Q3TDN2	Q3TDN2	FAS-associated factor 2	Faf2	52.471	8.0849	6		0.139123	0.910017	0.174106	28.1013	28.189	4	5	28.6505	28.0848	28.5806	27.6691	27.0894	29.1698	27.5392	27.1832	28.8928	28.1601
1237	Q3TEA8	Q3TEA8	Heterochromatin protein 1-binding protein 3	Hp1bp3	60.866	9.35627	29		0.0329882	0.987707	-0.0367756	32.6104	32.5736	5	5	32.6187	33.2522	31.9535	31.9893	33.2381	32.6608	31.9122	32.2125	32.6066	33.4758
1239	Q3THE2	Q3THE2	Myosin regulatory light chain 12B	Myl12b	19.779	9.30114	7		1.04666	0.310453	0.827784	30.6248	31.4526	5	5	30.2839	30.469	31.8213	30.0904	30.4593	31.8935	31.3798	31.5892	32.052	30.3485
1240	Q3THG9	Q3THG9	Alanyl-tRNA editing protein Aarsd1	Aarsd1	44.97	7.6039	6		0.197047	0.878587	0.244614	27.1382	26.9542	3	4	26.8968	26.5428	26.432	28.0859	26.524	25.6345	27.3251	27.3894	27.4677	27.8878
1241	Q3THK7	Q3THK7	GMP synthase [glutamine-hydrolyzing]	Gmps	76.723	9.24662	39		0.0822173	0.98204	-0.0231781	33.1963	33.1731	5	5	33.1822	33.0969	33.1863	33.3565	33.1594	32.9571	33.131	33.3247	33.4474	33.0053
1242	Q3THS6;Q91X83	Q3THS6	S-adenosylmethionine synthase isoform type-2	Mat2a	43.688	9.15479	15		0.214282	0.918423	-0.0797718	31.6864	31.6067	5	5	31.6556	32.0163	31.5861	31.213	31.9612	31.7273	31.4756	31.5845	31.6009	31.6451
1245	Q3TIV5	Q3TIV5	Zinc finger CCCH domain-containing protein 15	Zc3h15	48.327	7.60525	6	+	2.44694	0.0212698	1.57656	NaN	27.9069	0	4	25.9901	26.6043	26.461	25.4185	25.8848	27.1676	28.1987	28.2425	28.0188	26.6139
1246	Q3TIX9	Q3TIX9	U4/U6.U5 tri-snRNP-associated protein 2	Usp39	65.146	7.8241	6		0.403005	0.714487	-0.420938	27.8379	27.7114	5	4	28.1859	28.6583	27.5909	27.5379	27.2166	28.3042	27.1543	26.2394	27.1161	28.2708
1247	Q3TJD7	Q3TJD7	PDZ and LIM domain protein 7	Pdlim7	50.118	8.56547	13		0.122936	0.929554	-0.100958	30.2863	30.1854	5	5	30.0877	30.0812	30.1387	30.7753	30.3488	30.392	30.386	31.0064	29.3822	29.7602
1248	Q3TJZ6	Q3TJZ6	Protein FAM98A	Fam98a	55.055	8.51076	9		0.275832	0.867656	-0.182494	29.8589	29.6764	5	5	29.9693	30.3077	30.2415	29.1082	29.6679	29.6687	29.268	29.6296	30.3008	29.515
1249	Q3TKT4	Q3TKT4	Transcription activator BRG1	Smarca4	181.43	8.07155	13		0.287023	0.876289	0.151492	29.6004	29.7519	5	5	29.5373	30.0341	30.0376	29.1762	29.2169	30.1581	29.4313	29.6653	29.8249	29.6799
1251	Q3TLH4;Q7TPM1;Q7TSC1	Q3TLH4	Protein PRRC2C	Prrc2c	310.89	7.20887	6		1.67768	0.0814017	1.46651	NaN	28.7234	0	4	26.5455	26.9535	26.7832	27.828	26.1035	28.9424	28.3896	28.8905	28.6711	26.6526
1252	Q3TMW1	Q3TMW1	Coiled-coil domain-containing protein 102A	Ccdc102a	62.623	7.70996	4	+	2.5821	0.0105	2.32227	NaN	28.4339	0	5	26.5134	25.86	25.9343	27.5534	24.6973	28.6456	28.9391	28.9978	27.9685	27.6186
1256	Q3TSG4	Q3TSG4	RNA demethylase ALKBH5	Alkbh5	44.41	8.28655	7		1.51158	0.0915333	1.77293	28.4071	29.0537	2	5	27.3189	26.5098	28.5275	25.7607	28.2867	28.4103	29.3369	30.5838	28.7738	28.1637
1259	Q3TVI8	Q3TVI8	Pre-B-cell leukemia transcription factor-interacting protein 1	Pbxip1	81.163	7.20693	3		0.0526527	0.970605	-0.0632359	NaN	26.7869	0	4	26.0108	27.2978	27.6224	27.2727	26.2431	26.9628	26.271	26.1779	26.9831	27.7357
1260	Q3TW96	Q3TW96	UDP-N-acetylhexosamine pyrophosphorylase-like protein 1	Uap1l1	56.613	8.56503	18		0.475324	0.825799	0.161686	30.2497	30.4113	5	5	30.4598	30.3072	30.0648	30.5928	29.8237	30.1131	30.5047	30.524	30.4773	30.4376
1262	Q3TWW8	Q3TWW8	Serine/arginine-rich splicing factor 6	Srsf6	39.025	8.81631	10		0.198985	0.912265	-0.0950539	30.3881	30.293	5	5	30.0506	30.4537	30.8522	30.509	30.0748	30.1204	30.128	30.0903	30.4206	30.7057
1263	Q3TXS7	Q3TXS7	26S proteasome non-ATPase regulatory subunit 1	Psmd1	105.73	8.90592	31		0.474139	0.794091	-0.193724	32.1464	31.9527	5	5	32.3906	32.463	31.9973	31.9082	31.9728	32.2533	31.8502	31.5625	31.753	32.3442
1266	Q3U0V1	Q3U0V1	Far upstream element-binding protein 2	Khsrp	76.775	8.70369	19		0.992229	0.461667	0.470684	30.8053	31.276	5	5	30.5348	31.164	31.1184	30.6471	30.5622	30.8367	31.4298	31.6628	31.746	30.7046
1267	Q3U1J4	Q3U1J4	DNA damage-binding protein 1	Ddb1	126.85	8.51821	22		1.20311	0.606203	-0.24265	31.2446	31.002	5	5	31.0041	31.1839	31.3477	31.2857	31.4017	31.2089	31.1665	30.8909	30.735	31.0086
1268	Q3U2P1	Q3U2P1	Protein transport protein Sec24A	Sec24a	118.78	7.96601	8		1.13539	0.430848	-0.453083	28.6809	28.3544	5	4	28.8029	28.438	28.5398	28.7419	28.8817	28.8495	27.8425	28.3765	27.7212	28.3491
1269	Q3U319	Q3U319	E3 ubiquitin-protein ligase BRE1B	Rnf40	113.97	8.39813	14		0.0332573	0.987509	-0.0358902	30.5793	30.5435	5	5	30.9809	31.0853	31.3735	29.8691	29.5879	30.7008	30.9244	30.485	30.2722	30.3348
1271	Q3U7R1	Q3U7R1	Extended synaptotagmin-1	Esyt1	121.55	8.0959	13		0.123681	0.941426	-0.0813889	29.5225	29.4411	5	5	29.7751	29.7661	29.396	29.1258	29.5496	29.8825	29.2909	28.6712	29.7762	29.5847
1272	Q3U962	Q3U962	Collagen alpha-2(V) chain	Col5a2	145.02	8.58244	16		1.44526	0.539572	0.276045	31.7054	31.9814	5	5	31.7398	31.6021	31.6537	31.8225	31.7087	31.7658	32.0726	32.3023	31.7511	32.0153
1273	Q3U9G9	Q3U9G9	Lamin-B receptor	Lbr	71.439	8.09621	8		0.101413	0.917742	-0.224	28.684	28.2438	4	4	28.3757	29.1886	29.089	28.0826	25.4405	28.4431	26.0815	27.7665	28.1335	28.6319
1278	Q3UDE2	Q3UDE2	Tubulin--tyrosine ligase-like protein 12	Ttll12	74.042	8.55648	18		0.473717	0.820334	0.16512	30.6624	30.8275	5	5	30.3251	30.472	30.6472	31.1876	30.6801	30.8401	30.9657	30.8124	30.9403	30.579
1279	Q3UE37	Q3UE37	Ubiquitin-conjugating enzyme E2 Z	Ube2z	38.368	9.30432	9		0.40924	0.848405	0.153091	31.7213	31.8744	5	5	31.4294	31.5002	31.6054	32.1953	31.8762	31.7967	31.9523	32.0343	32.0394	31.5493
1280	Q3UEB3	Q3UEB3	Poly(U)-binding-splicing factor PUF60	Puf60	60.248	8.90546	18		0.0786322	0.970203	0.0423428	31.3343	31.3767	5	5	31.042	31.2253	31.2361	31.6943	31.4741	30.8562	31.4679	31.7061	31.6713	31.1821
1281	Q3UFF7	Q3UFF7	Lysophospholipase-like protein 1	Lyplal1	26.354	8.567	7		0.0459863	0.980786	0.0431679	29.0968	29.14	5	5	28.7066	28.848	29.4765	29.2168	29.2363	28.6881	28.3207	29.1141	29.9944	29.5827
1283	Q3UFY7	Q3UFY7	7-methylguanosine phosphate-specific 5-nucleotidase	Nt5c3b	34.425	9.05812	18		0.291901	0.881443	0.134243	31.3738	31.5081	5	5	31.5149	31.2708	31.3488	31.7423	30.9924	31.5165	31.5375	30.9803	31.9088	31.5973
1284	Q3UGC7;Q66JS6	Q3UGC7;Q66JS6	Eukaryotic translation initiation factor 3 subunit J-A;Eukaryotic translation initiation factor 3 subunit J-B	Eif3j1;Eif3j2	29.343	8.24961	4		0.426613	0.653031	0.635697	27.7726	28.9042	5	4	27.5098	27.5417	29.0773	27.5746	27.1596	28.4647	29.465	27.9887	29.6985	26.4246
1286	Q3UH68	Q3UH68	LIM and calponin homology domains-containing protein 1	Limch1	118.19	7.52063	7		0.373559	0.67278	0.743276	28.4941	28.4935	2	4	25.5927	26.9657	26.117	28.6606	28.3277	28.2148	28.9241	28.8713	27.9637	25.4062
1289	Q3UHD6;Q91VY6	Q3UHD6	Sorting nexin-27	Snx27	60.988	8.15299	12		0.0501426	0.989025	-0.0187557	29.0087	28.9899	5	5	29.1067	29.195	28.8089	29.1868	28.7459	28.9538	28.8576	29.0045	29.3271	28.8066
1291	Q3UHJ0	Q3UHJ0	AP2-associated protein kinase 1	Aak1	103.35	7.87162	7		0.276368	0.862995	0.188708	28.3532	28.5419	5	5	28.2567	28.3092	28.9204	27.9588	28.3209	28.3656	29.033	28.9525	27.7033	28.6552
1292	Q3UHR0	Q3UHR0	BAH and coiled-coil domain-containing protein 1	Bahcc1	282.52	6.71558	2		0.568596	0.644505	-0.389983	26.8667	NaN	4	0	27.3241	26.9181	26.8758	26.3486	26.7108	26.3418	26.4888	26.2881	27.4503	25.6585
1295	Q3UIA2;Q5SSM3	Q3UIA2	Rho GTPase-activating protein 17	Arhgap17	92.201	7.95435	7		0.22727	0.90406	0.118399	28.6418	28.6738	4	5	28.8221	28.8697	28.5345	28.3409	28.21	28.4985	28.8859	29.0415	28.1013	28.842
1296	Q3UJB9	Q3UJB9	Enhancer of mRNA-decapping protein 4	Edc4	152.48	8.35915	22		0.458756	0.862967	-0.126518	30.7933	30.6668	5	5	30.6575	30.932	30.8684	30.6458	30.8628	30.6032	30.64	30.39	31.0774	30.6235
1298	Q3UKJ7	Q3UKJ7	WD40 repeat-containing protein SMU1;WD40 repeat-containing protein SMU1, N-terminally processed	Smu1	57.543	8.66207	12		0.688381	0.653203	-0.305258	30.6098	30.3046	5	5	30.3319	30.5156	30.7738	30.7063	30.7216	30.4057	29.7119	30.0923	30.9644	30.3487
1299	Q3UL36	Q3UL36	Arginine and glutamate-rich protein 1	Arglu1	32.887	8.87463	4		0.458748	0.583332	0.937091	30.0696	30.123	4	5	29.5316	29.9902	30.5386	30.218	25.651	29.858	30.3538	30.4946	29.1876	30.7209
1300	Q3ULD5	Q3ULD5	Methylcrotonoyl-CoA carboxylase beta chain, mitochondrial	Mccc2	61.378	8.36778	10		1.42141	0.377264	0.453446	29.4209	29.8743	5	5	29.1505	29.3481	29.7131	29.1317	29.7611	29.5796	30.1343	29.5977	29.9205	30.1396
1302	Q3ULW8	Q3ULW8		Parp3	59.948	7.94102	4		1.04453	0.233298	1.27044	28.464	28.6244	2	4	28.5711	28.357	26.571	25.3638	26.8291	29.2724	28.676	28.2723	27.5467	28.2769
1304	Q3UM45	Q3UM45	Protein phosphatase 1 regulatory subunit 7	Ppp1r7	41.291	8.19973	16		0.878047	0.326099	1.11896	28.5799	29.2254	4	5	27.7816	26.2124	29.2692	28.1327	29.1363	28.8955	29.7053	29.5653	30.0393	27.9216
1307	Q3UMR5	Q3UMR5	Calcium uniporter protein, mitochondrial	Mcu	39.681	8.43954	5		0.262729	0.868723	0.186688	28.8291	29.0158	5	5	29.0907	28.8995	28.5104	28.5324	29.1129	30.0062	28.6991	28.9799	28.9473	28.4466
1308	Q3UMU9	Q3UMU9	Hepatoma-derived growth factor-related protein 2	Hdgfrp2	74.29	8.12985	7		0.00404912	0.99557	0.00302849	28.9674	28.9704	5	5	29.5545	28.774	29.1233	28.9066	28.4784	28.9697	28.8136	29.6316	28.8528	28.5842
1310	Q3UPH1	Q3UPH1	Protein PRRC1	Prrc1	46.297	9.36564	12		0.827422	0.78613	0.152887	31.758	31.9109	5	5	31.6498	31.563	31.8311	31.8312	31.9147	31.896	32.0947	31.8954	31.6727	31.9955
1312	Q3UPL0	Q3UPL0	Protein transport protein Sec31A	Sec31a	133.57	9.70472	59		1.02848	0.771577	-0.152003	35.052	34.9	5	5	35.0708	34.9595	35.1296	34.9467	35.1533	34.7509	34.8967	34.7568	35.0978	34.9977
1313	Q3UQ28	Q3UQ28	Peroxidasin homolog	Pxdn	165.1	8.39101	29		2.81466	0.107758	0.661932	30.7937	31.4556	5	5	30.7903	30.9818	30.775	30.6745	30.7469	31	31.5395	31.4319	31.8121	31.4946
1315	Q3UQN2	Q3UQN2	F-BAR domain only protein 2	Fcho2	88.733	7.82077	7		1.0503	0.477175	-0.407407	28.5578	28.1504	5	5	28.6449	28.5208	28.1997	28.8684	28.5552	27.8077	28.3141	27.697	28.6939	28.2393
1317	Q3URD3	Q3URD3	Sarcolemmal membrane-associated protein	Slmap	96.932	7.19044	4		0.627506	0.554163	-0.540884	26.9142	26.5373	4	3	27.434	26.9994	25.8256	27.1356	26.0879	26.9695	25.8526	26.1146	25.3136	26.5277
1319	Q3URU2	Q3URU2	Paternally-expressed gene 3 protein	Peg3	178.93	8.14333	22		0.303092	0.868422	-0.158904	30.3921	30.2332	5	5	30.6225	30.0389	31.0341	30.3108	29.9542	30.1223	29.9012	30.2539	30.4353	30.4534
1322	Q3UTJ2	Q3UTJ2	Sorbin and SH3 domain-containing protein 2	Sorbs2	132.35	8.20558	18		0.605649	0.655995	-0.328242	30.4052	30.077	5	5	30.2849	30.2566	31.1581	30.4237	29.9027	29.969	30.5549	30.3201	29.919	29.6219
1324	Q3UTY6	Q3UTY6	Thrombospondin type-1 domain-containing protein 4	Thsd4	113.24	8.57513	26		0.147144	0.914771	-0.123058	31.55	31.427	5	5	31.0966	31.0744	31.5611	32.3564	31.6616	31.1198	31.6912	32.0754	31.4528	30.7956
1329	Q3UW53	Q3UW53	Protein Niban	Fam129a	102.65	8.46913	17		0.69719	0.699983	0.242882	30.4763	30.7191	5	5	30.2667	30.193	30.4027	31.0189	30.5	30.7321	30.7676	30.4519	31.0312	30.613
1334	Q3V1G4	Q3V1G4	Olfactomedin-like protein 2B	Olfml2b	83.502	8.13994	7		0.135668	0.905459	-0.293666	28.5232	28.9707	5	4	27.6357	28.2699	29.1239	29.1593	28.4274	25.2651	29.1472	29.4601	29.1741	28.1014
1335	Q3V1L4	Q3V1L4	Cytosolic purine 5-nucleotidase	Nt5c2	64.808	7.58378	4		0.368224	0.877046	0.122655	26.9808	27.1034	5	5	26.9918	27.0036	26.8171	26.7011	27.3903	27.3156	27.2566	27.0214	27.1095	26.8142
1336	Q3V1M1	Q3V1M1	Immunoglobulin superfamily member 10	Igsf10	285.59	7.63517	11		0.320006	0.803439	0.268157	29.1571	29.4253	5	5	29.6597	29.1014	30.0371	28.2883	28.6992	29.586	28.91	29.3335	29.3246	29.9724
1337	Q3V1T4	Q3V1T4	Prolyl 3-hydroxylase 1	Lepre1	83.65	10.1642	54		3.1796	0.275305	-0.368871	36.0516	35.6827	5	5	36.1046	36.068	35.87	36.1988	36.0164	35.5518	35.6907	35.6314	35.7716	35.768
1339	Q3V3R1	Q3V3R1	Monofunctional C1-tetrahydrofolate synthase, mitochondrial	Mthfd1l	105.73	8.86497	37		1.65073	0.431553	0.357054	32.1246	32.4817	5	5	31.8038	32.008	32.5322	32.1198	32.1594	32.3878	32.5618	32.5191	32.5671	32.3727
1343	Q4LDD4	Q4LDD4	Arf-GAP with Rho-GAP domain, ANK repeat and PH domain-containing protein 1	Arap1	162.27	7.83912	8		0.0646557	0.978655	0.0340302	29.1492	29.1832	5	5	29.0284	29.5489	29.0833	29.496	28.5892	28.9453	29.3391	29.1545	29.1522	29.3249
1344	Q4QY64	Q4QY64	ATPase family AAA domain-containing protein 5	Atad5	203.91	8.90004	1	+	11.434	0	7.42571	NaN	33.8332	0	5	26.2523	26.2827	26.4689	26.3417	26.6918	33.5443	33.9442	34.012	33.7688	33.8967
1345	Q4VA53	Q4VA53	Sister chromatid cohesion protein PDS5 homolog B	Pds5b	164.42	8.28423	26		0.11588	0.949549	-0.0698269	30.7205	30.6506	5	5	30.5886	31.043	30.9429	30.0727	30.9552	31.0074	30.6516	30.1568	30.7018	30.7355
1347	Q4VBE8	Q4VBE8	WD repeat-containing protein 18	Wdr18	47.211	7.91514	5		0.0501357	0.981473	0.0350643	27.4041	27.5205	5	3	27.5365	27.473	27.7618	27.1087	27.1407	28.2734	27.216	27.072	27.2432	27.3914
1348	Q501J6	Q501J6	Probable ATP-dependent RNA helicase DDX17	Ddx17	72.399	9.43337	43		0.0953404	0.970927	0.0318687	33.4014	33.4333	5	5	33.3633	33.3985	33.4943	33.1157	33.6353	33.2685	33.2476	33.3708	33.7023	33.5773
1349	Q501P1	Q501P1	Fibulin-7	Fbln7	47.927	9.75562	28		0.19835	0.929102	0.0656067	34.0002	34.0658	5	5	33.8598	33.853	34.1706	34.0349	34.0824	33.6729	33.9266	34.2073	34.2917	34.2303
1352	Q505F5	Q505F5	Leucine-rich repeat-containing protein 47	Lrrc47	63.589	8.12385	6		0.475015	0.703863	0.341952	28.8491	29.1911	5	5	28.2511	29.22	29.8602	28.1122	28.8022	29.4423	29.123	29.2784	29.2095	28.902
1353	Q52KI8	Q52KI8	Serine/arginine repetitive matrix protein 1	Srrm1	106.86	7.98293	7		0.10142	0.930154	0.146791	29.0008	29.1476	5	5	28.3767	28.8663	28.7882	29.815	29.1579	27.4176	29.4404	29.4304	29.0865	30.3632
1354	Q569Z5	Q569Z5	Probable ATP-dependent RNA helicase DDX46	Ddx46	117.45	8.48085	34		0.608738	0.702594	-0.265561	31.0922	30.8267	5	5	31.0101	30.6902	31.0404	31.2328	31.4876	30.5903	31.094	30.7062	31.323	30.4198
1355	Q569Z6	Q569Z6	Thyroid hormone receptor-associated protein 3	Thrap3	108.18	9.38764	38		0.00864545	0.995307	-0.00443344	33.6929	33.6885	5	5	33.8339	33.5181	33.743	33.9549	33.4149	34.077	33.8925	33.6429	33.2389	33.5912
1357	Q58A65;Q9ESN9	Q58A65	C-Jun-amino-terminal kinase-interacting protein 4	Spag9	146.22	8.07416	17		0.608489	0.748479	0.217834	29.7811	29.9989	5	5	29.3058	30.0707	30.1513	29.6104	29.7672	29.995	29.8969	30.0798	30.2492	29.7737
1358	Q59J78	Q59J78	Mimitin, mitochondrial	Ndufaf2	19.628	8.28369	4	+	2.96423	0.00583333	2.53905	NaN	29.4863	0	4	25.9237	26.6234	26.4542	26.3209	27.1947	29.0978	29.2904	29.9286	29.6283	27.2672
1360	Q5DTM8	Q5DTM8	E3 ubiquitin-protein ligase BRE1A	Rnf20	113.52	8.03366	13		0.712612	0.583	0.389893	29.2691	29.659	5	5	28.9589	29.2462	30.0814	29.2503	28.8086	29.5852	29.9809	29.0775	29.9658	29.6855
1362	Q5DW34	Q5DW34	Histone-lysine N-methyltransferase EHMT1	Ehmt1	142	7.75465	5		0.60505	0.633572	0.378198	28.6728	29.051	5	5	28.3935	28.2281	28.6582	29.5784	28.506	29.4492	29.4275	29.038	28.9256	28.4148
1366	Q5F2E7	Q5F2E7	Nuclear fragile X mental retardation-interacting protein 2	Nufip2	75.656	7.75978	5		0.733581	0.475305	-0.639669	27.6759	27.1963	5	4	28.481	28.3539	28.0393	27.0642	26.4412	27.4425	26.8212	27.1534	27.3683	26.396
1368	Q5FW85	Q5FW85	Extracellular matrix protein 2	Ecm2	76.675	8.21625	10		0.3962	0.692272	-0.511382	29.3738	28.8624	5	5	29.437	28.9414	28.9671	30.1509	29.3728	28.9677	29.6099	29.9642	26.8819	28.8886
1370	Q5FWK3	Q5FWK3	Rho GTPase-activating protein 1	Arhgap1	50.41	8.85718	19		0.664841	0.613021	0.363143	30.8212	31.1843	5	5	30.1882	30.5766	31.3074	30.72	31.3137	31.0942	31.4984	30.92	31.6149	30.7941
1373	Q5QNQ9	Q5QNQ9	Collagen alpha-1(XXVII) chain	Col27a1	186.32	6.85255	3		0.726613	0.495679	0.539098	26.367	NaN	4	0	26.2503	26.4406	26.6894	27.56	26.0877	27.1722	27.4985	26.2839	26.8949	27.8742
1374	Q5SF07	Q5SF07	Insulin-like growth factor 2 mRNA-binding protein 2	Igf2bp2	65.583	8.93237	18		1.24863	0.656	-0.208824	31.6866	31.4778	5	5	31.5631	31.7233	31.6532	31.8365	31.6568	31.3702	31.4785	31.2789	31.766	31.4954
1375	Q5SNZ0	Q5SNZ0	Girdin	Ccdc88a	215.92	7.43008	4		1.28212	0.140024	-1.61624	28.7664	29.2144	4	1	27.2944	28.5772	29.0221	28.8029	28.6634	26.9648	25.3954	26.4023	29.2144	26.3017
1379	Q5SSL4	Q5SSL4	Active breakpoint cluster region-related protein	Abr	97.666	7.51691	8		1.26959	0.211288	-0.986959	27.9844	27.4008	4	2	27.7378	27.8056	28.3336	26.7922	28.0606	27.265	25.9594	25.8686	27.5365	27.1655
1380	Q5SSZ5	Q5SSZ5	Tensin-3	Tns3	155.59	8.37943	20		0.71912	0.699739	0.238521	30.5886	30.8271	5	5	30.4822	30.2527	30.6935	30.7708	30.7437	30.328	30.7836	30.9093	31.0817	31.033
1381	Q5SUF2	Q5SUF2	Luc7-like protein 3	Luc7l3	51.45	9.12496	13		0.0445281	0.986966	-0.027412	31.458	31.4306	5	5	31.7963	31.6667	31.4146	31.3506	31.0619	31.1562	31.0619	31.254	31.7094	31.9715
1382	Q5SUR0	Q5SUR0	Phosphoribosylformylglycinamidine synthase	Pfas	144.63	9.07324	43		1.48234	0.733249	0.158785	32.9424	33.1012	5	5	33.019	32.9714	32.8618	33.0763	32.7838	33.0299	33.1485	33.0198	33.1666	33.1413
1383	Q5SVD0	Q5SVD0	Filamin-interacting protein FAM101B	Fam101b	23.379	8.68595	4	+	2.03747	0.0457727	1.48182	NaN	28.4459	0	4	26.6358	26.5662	27.0921	25.7572	27.1631	27.936	28.8479	28.5873	26.84	28.4124
1387	Q5SX39	Q5SX39	Myosin-4	Myh4	222.86	8.47169	130		0.631886	0.431784	1.34989	31.5538	31.8998	4	5	32.2427	31.8824	30.777	31.3131	26.5344	32.3453	31.7364	31.4803	31.7208	32.2161
1388	Q5SX40	Q5SX40	Myosin-1	Myh1	223.34	8.30632	134		0.182129	0.88145	0.260525	30.7964	31.0569	5	5	31.9891	31.8953	30.1795	30.1274	29.7905	32.0572	30.5064	30.4718	30.7517	31.4973
1389	Q5SYD0	Q5SYD0	Unconventional myosin-Id	Myo1d	116.08	6.88705	8		0.0896021	0.949632	0.10086	26.4179	NaN	4	0	26.8012	26.0483	26.2178	27.6236	26.6044	25.9038	26.5569	26.928	27.7989	26.612
1390	Q5U3K5	Q5U3K5	Rab-like protein 6	Rabl6	79.83	7.87811	3		0.145333	0.917409	-0.116296	27.9594	27.8431	5	5	28.1283	28.4105	27.471	27.8934	27.8938	27.0834	27.5424	27.7774	28.6437	28.1685
1393	Q5XJE5	Q5XJE5	RNA polymerase-associated protein LEO1	Leo1	75.596	8.12333	3		0.629917	0.5831	-0.452706	29.4167	28.964	5	5	29.4298	29.2668	29.7021	29.6316	29.0531	28.7249	29.2073	29.4479	27.7907	29.6491
1394	Q5XJY5	Q5XJY5	Coatomer subunit delta	Arcn1	57.229	9.82721	47		0.125793	0.971585	0.0273117	34.3721	34.3994	5	5	34.404	34.2939	34.5063	34.1959	34.4604	34.4773	34.2704	34.2378	34.5018	34.5098
1395	Q5XKE0	Q5XKE0	Myosin-binding protein C, fast-type	Mybpc2	127.35	7.53092	2		0.194068	0.882018	0.230096	27.5717	27.8126	5	4	28.6144	28.2711	26.8675	27.0102	27.0953	27.8889	27.1164	27.7587	27.3563	28.8886
1396	Q60520	Q60520	Paired amphipathic helix protein Sin3a	Sin3a	145.09	7.5559	8		1.79849	0.112493	-1.02737	28.3261	27.9078	5	2	28.4505	28.7163	28.3117	27.5611	28.591	26.5835	28.0232	27.7923	27.197	26.8979
1398	Q60596	Q60596	DNA repair protein XRCC1	Xrcc1	68.97	8.17751	7		0.562746	0.553705	-0.671535	29.1446	28.4731	5	5	30.367	30.5172	27.9114	28.8117	28.1159	27.9096	28.573	28.7182	28.4237	28.741
1399	Q60597	Q60597	2-oxoglutarate dehydrogenase, mitochondrial	Ogdh	116.45	9.47903	58		0.116526	0.96952	0.0354424	34.0048	34.0403	5	5	34.0929	34.0439	33.7884	34.1879	33.911	33.9004	33.9514	33.8355	34.2506	34.2634
1400	Q60598	Q60598	Src substrate cortactin	Cttn	61.249	9.02845	15		0.138997	0.934032	-0.0809116	31.8211	31.7402	5	5	32.0427	31.8614	31.9225	32.1021	31.1766	32.1636	31.8344	31.8756	31.3157	31.5114
1401	Q60604	Q60604	Adseverin	Scin	80.253	9.17872	28		0.908612	0.742744	-0.183039	32.9375	32.7544	5	5	32.7307	32.7676	32.9045	33.1677	33.1167	32.6138	32.6753	32.7956	32.9545	32.733
1402	Q60605	Q60605	Myosin light polypeptide 6	Myl6	16.93	9.86021	12		0.687226	0.476747	0.667295	32.6716	33.3389	5	5	32.635	32.7299	33.0945	32.9084	31.9901	33.2268	33.9175	34.5765	33.0587	31.915
1406	Q60668	Q60668	Heterogeneous nuclear ribonucleoprotein D0	Hnrnpd	38.354	9.46473	15		0.0999755	0.957839	-0.0604996	32.18	32.1195	5	5	32.1149	32.5839	32.6445	31.5855	31.9713	31.9156	32.0125	31.93	32.287	32.4525
1408	Q60692	Q60692	Proteasome subunit beta type-6	Psmb6	25.378	8.61451	4		0.534753	0.567383	-0.68694	29.2524	28.9598	5	4	28.0205	28.4707	29.8245	30.0957	29.8508	29.4	26.9883	29.1917	29.0147	28.2326
1409	Q60710	Q60710	Deoxynucleoside triphosphate triphosphohydrolase SAMHD1	Samhd1	75.892	8.41459	17		0.19175	0.903604	-0.121049	30.1947	30.0736	5	5	30.763	30.3765	29.7678	30.1815	29.8845	30.0111	30.2238	30.045	29.4962	30.5919
1410	Q60715	Q60715	Prolyl 4-hydroxylase subunit alpha-1	P4ha1	60.909	10.5049	53		0.0172764	0.994231	0.00783844	36.6226	36.6305	5	5	36.4269	36.2878	36.8455	36.992	36.561	36.4795	36.6758	36.9152	36.4395	36.6423
1411	Q60716	Q60716	Prolyl 4-hydroxylase subunit alpha-2	P4ha2	61.001	10.2306	47		0.147171	0.944073	-0.0643684	35.9726	35.9083	5	5	35.7553	35.6468	36.0687	36.4151	35.9773	35.703	36.0303	36.194	35.9665	35.6475
1412	Q60737	Q60737	Casein kinase II subunit alpha	Csnk2a1	45.133	9.05354	13		0.195323	0.896628	-0.155529	31.2533	31.0977	5	5	31.8404	31.6818	31.3174	30.7012	30.7255	31.5622	30.3881	31.0402	31.5105	30.9876
1413	Q60739	Q60739	BAG family molecular chaperone regulator 1	Bag1	39.74	7.90796	3	+	2.19384	0.0264	1.79721	NaN	28.1439	0	4	25.7574	26.8134	26.6156	25.0948	25.9713	28.1235	29.0293	27.6818	26.6628	27.7412
1414	Q60749;Q9R226;Q9WU01	Q60749	KH domain-containing, RNA-binding, signal transduction-associated protein 1	Khdrbs1	48.37	9.83218	14		1.25542	0.34133	0.567914	32.8847	33.4526	5	5	32.5503	32.831	33.6452	32.2652	33.1316	33.4204	33.3627	33.6501	33.6366	33.1931
1416	Q60760	Q60760	Growth factor receptor-bound protein 10	Grb10	70.584	8.83335	13		0.871001	0.475432	-0.505882	31.347	30.8411	5	5	31.6486	31.5443	31.8342	30.3569	31.3508	31.3086	30.5833	30.4098	30.9051	30.9985
1417	Q60770	Q60770	Syntaxin-binding protein 3	Stxbp3	67.942	7.52658	6		0.420915	0.846506	0.151155	26.4535	NaN	4	0	26.7133	26.1781	26.7069	26.3063	26.6164	26.9354	26.2627	26.7004	26.534	26.8442
1418	Q60790	Q60790	Ras GTPase-activating protein 3	Rasa3	95.986	8.87761	3		0.905001	0.430932	0.580526	31.786	32.3665	5	5	31.9103	31.9738	31.9838	32.4911	30.571	32.6813	32.4677	32.1178	32.4241	32.1418
1420	Q60823	Q60823	RAC-beta serine/threonine-protein kinase	Akt2	55.741	8.12421	11		2.21688	0.0570204	-1.12475	29.3298	28.205	5	5	29.1317	29.0589	29.7038	29.5848	29.1697	29.1938	27.824	27.6012	28.1019	28.3042
1421	Q60838	Q60838	Segment polarity protein dishevelled homolog DVL-2	Dvl2	78.86	7.32183	4		0.428622	0.714992	-0.375394	NaN	26.0504	0	4	26.9077	26.4002	26.4496	25.6222	27.2218	27.1136	25.6284	25.7085	26.5229	25.7512
1422	Q60847	Q60847	Collagen alpha-1(XII) chain	Col12a1	340.21	10.1027	206		0.459793	0.833418	-0.156136	37.7562	37.6	5	5	37.8892	37.8762	37.8504	37.3198	37.8453	37.9352	37.5578	37.3901	37.3497	37.7673
1423	Q60854	Q60854	Serpin B6	Serpinb6	42.598	8.82278	13		0.611962	0.651622	0.338747	30.5752	30.914	5	5	30.2056	30.3603	30.5963	30.6821	31.0318	30.241	30.716	30.7663	31.329	31.5175
1425	Q60864	Q60864	Stress-induced-phosphoprotein 1	Stip1	62.581	8.72813	22		1.20699	0.322129	0.644554	30.8574	31.502	5	5	30.7098	31.1052	31.6334	30.5267	30.312	31.2723	31.9071	31.9635	31.3324	31.0347
1426	Q60865	Q60865	Caprin-1	Caprin1	78.168	7.94406	6		0.166364	0.910008	-0.121277	27.8945	27.9824	5	4	27.7767	27.9122	28.4094	27.7189	27.6553	28.1045	27.7596	27.6369	28.4286	26.9364
1427	Q60870	Q60870	Receptor expression-enhancing protein 5	Reep5	21.05	9.07122	4		0.159571	0.897459	-0.236386	29.5423	29.306	5	5	30.129	29.8673	30.4037	28.6056	28.7061	30.8118	28.8316	28.2476	28.9558	29.6831
1428	Q8BMJ3;Q60872	Q8BMJ3;Q60872	Eukaryotic translation initiation factor 1A, X-chromosomal;Eukaryotic translation initiation factor 1A	Eif1ax;Eif1a	16.46	8.71878	3		0.76209	0.520515	-0.465988	28.9298	28.4638	5	5	29.0989	28.8296	29.6392	28.2771	28.804	28.8765	28.24	27.7765	28.9766	28.4492
1430	Q60902	Q60902	Epidermal growth factor receptor substrate 15-like 1	Eps15l1	99.307	8.0746	14		0.0062471	0.995707	0.0107723	29.4967	29.5075	5	5	29.5849	29.8948	29.2051	29.7408	29.058	28.6589	30.9276	29.9738	27.8035	30.1738
1431	Q60930	Q60930	Voltage-dependent anion-selective channel protein 2	Vdac2	31.732	9.76876	14		0.96455	0.570727	0.316432	33.433	33.7494	5	5	33.1856	33.0344	33.4894	33.7716	33.6838	33.4194	33.8573	34.0484	33.7167	33.7051
1432	Q60931	Q60931	Voltage-dependent anion-selective channel protein 3	Vdac3	30.752	9.5484	10		0.54301	0.750154	-0.232765	32.6356	32.4028	5	5	32.639	32.7399	32.6651	32.1032	33.0308	32.5994	32.2964	32.0855	32.1979	32.8348
1433	Q60932	Q60932	Voltage-dependent anion-selective channel protein 1	Vdac1	32.351	9.97727	17		0.871785	0.740818	0.184522	34.2271	34.4116	5	5	34.1721	34.1586	34.3075	34.418	34.0793	34.328	34.5217	34.7007	34.3551	34.1525
1436	Q60967	Q60967	Bifunctional 3-phosphoadenosine 5-phosphosulfate synthase 1;Sulfate adenylyltransferase;Adenylyl-sulfate kinase	Papss1	70.793	9.45787	37		0.419991	0.834194	-0.162489	33.5832	33.4208	5	5	33.7665	33.6308	33.4592	33.6045	33.4551	32.9417	33.651	33.6422	33.1087	33.7602
1437	Q60972	Q60972	Histone-binding protein RBBP4	Rbbp4	47.655	9.69035	21		0.0367969	0.987127	-0.0304886	33.1017	33.0713	5	5	32.8134	32.8057	32.8403	33.9918	33.0574	32.7396	33.3378	33.5654	33.1092	32.6043
1438	Q60973	Q60973	Histone-binding protein RBBP7	Rbbp7	47.789	10.0126	22		0.0917491	0.963042	-0.0494141	34.2696	34.2202	5	5	34.1812	34.2126	34.2279	34.7402	33.9862	33.7194	34.0403	34.5992	34.3714	34.3708
1440	Q61024	Q61024	Asparagine synthetase [glutamine-hydrolyzing]	Asns	64.282	8.92032	20		0.643716	0.7855	0.16761	31.4462	31.6138	5	5	31.2422	31.3283	31.58	31.3449	31.7355	31.6507	31.5526	31.3676	31.9203	31.5778
1442	Q61029	Q61029	Lamina-associated polypeptide 2, isoforms beta/delta/epsilon/gamma	Tmpo	50.372	8.86467	19		0.0702985	0.957868	0.108558	30.4603	30.5689	5	5	31.14	31.6595	30.046	29.4205	30.0358	31.6385	29.8856	29.5428	30.9935	30.784
1443	Q61033	Q61033	Lamina-associated polypeptide 2, isoforms alpha/zeta	Tmpo	75.167	8.92096	20		0.147327	0.918356	-0.104223	31.9745	31.8703	5	5	32.3922	32.3762	32.1082	31.2141	31.782	31.9872	31.9412	31.7689	31.3342	32.3202
1444	Q61035	Q61035	Histidine--tRNA ligase, cytoplasmic	Hars	57.432	8.63142	14		0.151077	0.971181	-0.0281258	30.5798	30.5517	5	5	30.6156	30.6155	30.4529	30.5068	30.7082	30.6781	30.5319	30.4839	30.6762	30.3884
1446	Q61043	Q61043	Ninein	Nin	243.72	7.61463	2	+	2.10973	0.0195789	2.49017	NaN	29.4336	0	4	25.526	26.0248	26.7465	26.8248	27.4639	28.3242	29.046	29.2967	31.0674	27.3026
1449	Q61074	Q61074	Protein phosphatase 1G	Ppm1g	58.727	8.79255	14		0.119355	0.950562	0.0629082	30.8397	30.9026	5	5	30.6189	30.7703	30.4394	31.3955	30.9747	30.6078	31.033	31.095	31.1208	30.6567
1450	Q61081	Q61081	Hsp90 co-chaperone Cdc37;Hsp90 co-chaperone Cdc37, N-terminally processed	Cdc37	44.593	9.22712	23		0.762788	0.443841	0.717045	31.1926	31.9096	5	5	31.6331	31.9385	32.2818	30.0721	30.0372	31.8267	31.9212	31.7701	31.9426	32.0874
1452	Q61103	Q61103	Zinc finger protein ubi-d4	Dpf2	44.229	7.75555	3		1.17082	0.272708	-0.800592	27.5783	NaN	5	0	27.3247	27.5733	28.4024	27.5772	27.0139	26.7699	26.8226	25.6694	27.2746	27.3521
1454	Q61112	Q61112	45 kDa calcium-binding protein	Sdf4	42.064	8.89704	12		0.579137	0.631493	0.404427	30.6765	31.0809	5	5	30.6995	31.114	31.0497	30.5354	29.9839	31.065	31.756	31.4644	30.9371	30.1822
1456	Q61136	Q61136	Serine/threonine-protein kinase PRP4 homolog	Prpf4b	116.97	7.93666	9		0.300419	0.780681	-0.417062	28.7297	28.8054	5	4	28.8776	28.8267	29.0965	28.0587	28.7888	29.0742	28.2971	26.3414	28.1637	29.6867
1459	Q61164	Q61164	Transcriptional repressor CTCF	Ctcf	83.745	8.77522	16		0.497495	0.709294	0.313656	30.5056	30.8193	5	5	30.6622	31.1456	30.7541	29.8721	30.0942	31.3361	30.4012	30.8208	30.436	31.1024
1460	Q61166	Q61166	Microtubule-associated protein RP/EB family member 1	Mapre1	30.016	8.93072	14		0.959189	0.396928	0.651197	30.3622	31.0134	5	5	29.5374	30.0339	31.3275	30.1158	30.7965	30.8559	30.9413	31.1142	31.628	30.5278
1461	Q61171	Q61171	Peroxiredoxin-2	Prdx2	21.778	9.75014	14		0.176248	0.905163	0.130233	33.1006	33.2308	5	5	32.5913	32.7501	32.9134	33.5987	33.6496	32.5545	33.2305	33.6433	33.5434	33.1824
1463	Q61187	Q61187	Tumor susceptibility gene 101 protein	Tsg101	44.123	8.25619	3		0.644006	0.584703	0.431564	28.5031	28.9346	5	5	28.1893	28.4545	29.3171	28.4051	28.1493	28.7326	29.2164	28.8747	29.6839	28.1655
1464	Q61191	Q61191	Host cell factor 1;HCF N-terminal chain 1;HCF N-terminal chain 2;HCF N-terminal chain 3;HCF N-terminal chain 4;HCF N-terminal chain 5;HCF N-terminal chain 6;HCF C-terminal chain 1;HCF C-terminal chain 2;HCF C-terminal chain 3;HCF C-terminal chain 4;HCF C-terminal chain 5;HCF C-terminal chain 6	Hcfc1	210.43	8.54179	23		0.666711	0.66842	0.286384	31.5368	31.8232	5	5	31.0123	31.373	31.9571	31.3833	31.9583	31.5332	31.8781	31.7753	32.185	31.7443
1465	Q61205	Q61205	Platelet-activating factor acetylhydrolase IB subunit gamma	Pafah1b3	25.853	9.09008	12		1.26919	0.205684	1.03159	30.6558	31.6874	5	5	31.059	31.4892	31.2067	29.5417	29.9824	31.7062	31.6435	31.5985	32.5501	30.9386
1466	Q61206	Q61206	Platelet-activating factor acetylhydrolase IB subunit beta	Pafah1b2	25.581	8.85503	9		0.995544	0.356598	0.722348	28.9423	29.6647	5	5	28.7	29.4262	30.0243	28.0784	28.4827	29.1915	29.6885	30.2021	29.8456	29.3955
1467	Q61207	Q61207	Prosaposin	Psap	61.422	8.16735	13		0.310897	0.779628	0.391323	28.9017	29.293	5	5	28.7183	28.7715	30.2235	28.8503	27.945	29.1921	30.2099	30.1102	28.8295	28.1235
1468	Q61210	Q61210	Rho guanine nucleotide exchange factor 1	Arhgef1	102.8	8.56721	23		0.0910675	0.959532	-0.0548466	31.0037	30.9488	5	5	30.8307	31.0603	31.2988	30.3323	31.4962	31.0732	30.7245	30.7533	30.9918	31.2012
1472	Q61233	Q61233	Plastin-2	Lcp1	70.148	8.489	27		0.435985	0.816535	0.178718	30.4096	30.5883	5	5	30.1136	30.1157	30.3363	30.5933	30.8893	30.7075	30.6655	30.8304	30.5679	30.1703
1474	Q61235	Q61235	Beta-2-syntrophin	Sntb2	56.381	7.60117	10		0.648575	0.571771	0.467036	27.0723	NaN	4	0	26.8088	26.7682	27.8121	25.7312	26.8999	27.5055	26.9688	26.9349	27.4674	27.479
1475	Q61239	Q61239	Protein farnesyltransferase/geranylgeranyltransferase type-1 subunit alpha	Fnta	44.013	8.70727	10		0.0984575	0.94459	0.0984138	29.8666	29.965	5	5	29.4955	29.887	30.3762	29.5859	29.9885	29.7963	29.6883	29.1215	31.1591	30.0601
1476	Q61245	Q61245	Collagen alpha-1(XI) chain	Col11a1	181.03	9.33319	43		0.0568673	0.987137	-0.0200531	34.5592	34.5392	5	5	34.2349	34.4661	34.6459	34.7074	34.7419	34.3016	34.625	34.7985	34.5228	34.4481
1479	Q61282;P55066	Q61282	Aggrecan core protein	Acan	221.94	9.93647	58		0.702328	0.653459	-0.299106	35.9516	35.6524	5	5	36.5059	35.8066	35.7171	36.2349	35.4932	36.0031	35.7302	35.6755	35.3766	35.4768
1480	Q61292	Q61292	Laminin subunit beta-2	Lamb2	196.58	9.02776	64		0.379988	0.897902	0.0952919	33.5616	33.6569	5	5	33.5509	33.4244	33.4926	33.8305	33.5093	33.6191	33.9852	33.5512	33.4882	33.6407
1481	Q61316	Q61316	Heat shock 70 kDa protein 4	Hspa4	94.132	9.04782	46		0.187518	0.902312	0.135376	32.7973	32.9326	5	5	32.0975	32.4897	32.7972	33.4001	33.2018	32.4523	33.0114	32.9265	33.4621	32.8109
1482	Q61335	Q61335	B-cell receptor-associated protein 31	Bcap31	27.956	9.02661	8		0.680254	0.583136	0.410335	30.524	30.9344	5	5	30.8265	30.6839	30.758	29.8167	30.5351	31.3965	31.3198	30.2832	31.239	30.4334
1483	Q61390	Q61390	T-complex protein 1 subunit zeta-2	Cct6b	58.184	8.74957	7		0.527816	0.587644	0.580691	30.6332	31.2139	5	5	29.652	30.088	30.8475	30.7811	31.7972	30.397	32.2477	31.9317	30.8856	30.6073
1484	Q61391	Q61391	Neprilysin	Mme	85.701	7.45495	5		0.443273	0.742045	-0.309927	27.3672	NaN	5	0	27.1646	27.3658	27.5243	27.5668	27.2146	26.7247	26.3619	26.6918	28.0806	27.4274
1485	Q61398	Q61398	Procollagen C-endopeptidase enhancer 1	Pcolce	50.167	10.0888	27		0.320094	0.882502	-0.122439	34.8515	34.7291	5	5	34.9238	34.8015	35.077	34.6885	34.7668	34.2496	34.5	34.9592	34.9529	34.9837
1486	Q61425	Q61425	Hydroxyacyl-coenzyme A dehydrogenase, mitochondrial	Hadh	34.463	8.63167	11		0.935457	0.475875	0.469816	29.3005	29.7703	5	5	29.208	29.2613	29.1511	29.3483	29.5337	29.4335	29.4554	29.2166	30.5811	30.1648
1490	Q61474	Q61474	RNA-binding protein Musashi homolog 1	Msi1	39.119	7.90248	3		0.516119	0.622372	0.500808	NaN	27.1309	0	4	26.9703	27.7	25.7891	25.3348	26.7836	26.5581	26.7786	26.9478	27.3548	27.4425
1492	Q61500	Q61500	Integral membrane protein 2A	Itm2a	29.691	8.82159	7		0.60068	0.561524	-0.559301	30.0262	29.4669	5	5	29.7098	30.4038	30.8391	29.594	29.5843	29.8409	29.7115	29.4473	28.0681	30.2666
1493	Q61503	Q61503	5-nucleotidase	Nt5e	63.864	8.2845	11		0.575357	0.585591	-0.511503	29.3602	29.1948	5	4	29.2548	28.926	29.5995	29.7673	29.2537	29.0406	29.9368	29.101	27.4643	28.7009
1495	Q61543	Q61543	Golgi apparatus protein 1	Glg1	133.73	9.29026	65		0.186134	0.923037	-0.0768593	33.8072	33.7304	5	5	33.9615	34.1437	33.7233	33.5181	33.6897	33.8829	33.7997	33.2773	33.7137	33.9783
1497	Q61550;A2AU37	Q61550	Double-strand-break repair protein rad21 homolog	Rad21	72.082	8.05011	9		0.277563	0.77895	0.534262	28.4896	28.5886	4	4	28.6055	28.7014	28.6427	24.8093	28.0086	28.5911	28.8452	28.6097	27.0846	28.3083
1498	Q61553	Q61553	Fascin	Fscn1	54.507	9.43998	26		1.23018	0.454531	-0.396291	33.4348	33.0386	5	5	33.7778	33.0995	33.4258	33.2979	33.5732	32.6395	32.9748	32.8836	33.3783	33.3166
1499	Q61554	Q61554	Fibrillin-1	Fbn1	312.3	9.31239	105		0.667945	0.682244	0.273878	34.9851	35.259	5	5	35.3376	35.2272	34.5605	35.2304	34.5698	35.1312	35.535	35.4032	34.9196	35.3058
1500	Q61555	Q61555	Fibrillin-2	Fbn2	313.82	9.37223	90		0.361865	0.868576	0.138075	35.0514	35.1895	5	5	35.4493	35.2732	34.7504	35.138	34.6465	35.1954	35.1671	35.1155	35.0299	35.4397
1501	Q61559	Q61559	IgG receptor FcRn large subunit p51	Fcgrt	40.092	8.35875	5		0.289792	0.808231	-0.308497	28.0481	27.7396	5	5	27.7044	29.3549	27.4042	28.2593	27.5178	26.8702	27.7953	27.4986	28.017	28.5171
1502	Q61576	Q61576	Peptidyl-prolyl cis-trans isomerase FKBP10	Fkbp10	64.697	10.1464	36		0.0682009	0.988647	0.019136	35.765	35.7842	5	5	35.6431	35.7389	35.8607	35.9364	35.646	35.5842	35.8273	36.0716	35.7603	35.6775
1504	Q61581	Q61581	Insulin-like growth factor-binding protein 7	Igfbp7	28.969	7.61408	3		0.193984	0.89933	0.158739	26.319	26.4777	5	5	26.7474	26.1864	26.8113	26.2633	25.5866	25.7827	26.4227	26.8952	26.1794	27.1088
1505	Q61584	Q61584	Fragile X mental retardation syndrome-related protein 1	Fxr1	76.221	8.8048	17		0.24186	0.900913	-0.116578	31.3261	31.2095	5	5	31.3245	31.6442	31.1646	31.1666	31.3305	31.5299	30.6568	30.9564	31.6013	31.303
1506	Q61595	Q61595	Kinectin	Ktn1	152.59	7.71903	14		0.196475	0.896557	-0.152063	29.0302	28.8781	5	5	28.8447	29.6449	29.6604	28.4534	28.5475	28.7277	28.9154	29.148	28.3371	29.2624
1507	Q61598	Q61598	Rab GDP dissociation inhibitor beta	Gdi2	50.537	9.72815	41		0.115243	0.949692	-0.0695404	34.1768	34.1073	5	5	33.6433	33.951	34.4787	34.2781	34.5329	33.5455	34.1305	34.1035	34.3521	34.4049
1508	Q61599	Q61599	Rho GDP-dissociation inhibitor 2	Arhgdib	22.851	9.0959	9		2.34087	0.111971	0.755212	30.5279	31.2831	5	5	30.8036	30.397	30.8413	30.5864	30.0112	31.0221	31.2918	31.4008	31.6652	31.0356
1511	Q61655;Q9QY15	Q61655	ATP-dependent RNA helicase DDX19A	Ddx19a	53.932	9.39338	22		0.0262758	0.993379	-0.0129448	33.1317	33.1187	5	5	32.9284	32.6879	33.2611	33.5759	33.2052	32.9933	33.2292	33.1452	33.3298	32.8963
1512	Q61656	Q61656	Probable ATP-dependent RNA helicase DDX5	Ddx5	69.289	9.64764	52		0.511262	0.785186	-0.19975	34.1797	33.9799	5	5	34.2253	34.3012	34.319	33.5646	34.4883	33.9839	33.8059	33.7999	34.296	34.0139
1513	Q61686	Q61686	Chromobox protein homolog 5	Cbx5	22.186	9.24252	11		1.01434	0.407443	0.570938	30.7622	31.3331	5	5	30.4875	30.6594	31.3371	30.8121	30.5147	31.2047	31.6704	31.7632	31.6627	30.3644
1514	Q61687	Q61687	Transcriptional regulator ATRX	Atrx	278.58	7.91615	19		0.0923473	0.959292	-0.0677658	30.2959	30.2281	5	5	30.0616	30.1592	30.2437	30.676	30.339	30.6416	30.4698	30.1526	30.5853	29.2915
1515	Q61699	Q61699	Heat shock protein 105 kDa	Hsph1	96.406	8.51642	23		0.45503	0.79341	0.201993	30.817	31.019	5	5	30.308	30.693	30.8753	31.168	31.0408	30.6564	30.8953	30.87	31.2694	31.404
1516	Q61702	Q61702	Inter-alpha-trypsin inhibitor heavy chain H1	Itih1	101.07	7.58116	6		0.905569	0.366928	0.81667	NaN	27.8562	0	4	27.6285	27.0821	26.2441	26.854	26.0985	27.6305	27.037	26.5658	27.957	28.8003
1517	Q61703;CON__Q9TRI1	Q61703	Inter-alpha-trypsin inhibitor heavy chain H2	Itih2	105.93	8.64464	17		0.415983	0.79258	-0.215685	31.4347	31.219	5	5	31.7762	31.4845	30.7923	31.4472	31.673	31.1358	31.2109	30.8167	31.7946	31.1369
1518	Q61704;CON__Q0V8M9	Q61704	Inter-alpha-trypsin inhibitor heavy chain H3	Itih3	99.357	8.57054	10		0.187378	0.904025	-0.130677	30.6743	30.5436	5	5	31.2318	31.0263	30.1553	30.676	30.282	30.9624	30.3235	30.0073	30.4812	30.9436
1519	Q61711	Q61711	Bone sialoprotein 2	Ibsp	35.734	9.18636	4	+	2.97299	0.007625	1.97314	28.9465	30.9197	5	5	29.0875	29.3572	28.2107	28.173	29.9043	31.253	30.879	30.8147	31.4335	30.2182
1520	Q61735	Q61735	Leukocyte surface antigen CD47	Cd47	33.097	8.52359	3	+	2.67531	0.00693333	2.72706	NaN	29.3848	0	4	25.7661	25.4027	26.0395	26.8926	26.6524	29.9452	26.8496	28.7562	29.6461	29.1916
1522	Q61739	Q61739	Integrin alpha-6;Integrin alpha-6 heavy chain;Integrin alpha-6 light chain	Itga6	122.16	8.49792	22		0.128554	0.9278	-0.100152	31.2019	31.1018	5	5	30.8594	30.9174	31.1718	31.5641	31.4969	31.0895	31.4313	31.6436	30.1415	31.2029
1524	Q61753	Q61753	D-3-phosphoglycerate dehydrogenase	Phgdh	56.585	9.72667	26		0.19868	0.918861	0.0793228	33.81	33.8894	5	5	33.5865	33.6232	34.0557	33.976	33.8088	33.4062	33.8839	34.0748	34.1501	33.9318
1525	Q61768;P28738	Q61768	Kinesin-1 heavy chain	Kif5b	109.55	8.88465	36		0.64646	0.770981	0.185223	32.3519	32.5372	5	5	32.737	32.5119	32.1752	31.9549	32.3806	32.6232	32.4389	32.444	32.5488	32.6309
1526	Q61792	Q61792	LIM and SH3 domain protein 1	Lasp1	29.994	8.97598	11		0.628896	0.634613	0.359765	30.5385	30.8982	5	5	30.892	30.5443	31.0427	30.2208	29.9927	31.1439	30.7081	31.08	31.3426	30.2166
1527	Q61810	Q61810	Latent-transforming growth factor beta-binding protein 3	Ltbp3	134.36	8.09992	10		1.0212	0.601924	-0.266966	30.0887	29.8218	5	5	30.0006	29.8437	30.1119	30.5555	29.932	29.7571	29.9454	29.8278	29.971	29.6075
1528	Q61823	Q61823	Programmed cell death protein 4	Pdcd4	51.702	8.5361	11		0.372198	0.879734	0.11941	29.8551	29.9745	5	5	29.5985	29.971	30.1097	29.5277	30.0687	30.1937	29.9952	29.9356	30.0073	29.7409
1529	Q61830	Q61830	Macrophage mannose receptor 1	Mrc1	164.98	7.94747	18		0.0879092	0.959047	0.0660355	29.4883	29.5543	5	5	29.5015	29.6299	28.851	29.6291	29.83	29.5658	30.0254	29.1951	28.9454	30.04
1531	Q61851;Q03142;P21803;P35969;P35918	Q61851	Fibroblast growth factor receptor 3	Fgfr3	87.757	7.80473	6	+	2.18446	0.0286027	-1.67537	28.6652	NaN	4	0	28.0745	28.5439	27.7816	28.6628	29.3797	26.6018	28.0258	26.8869	26.8357	25.7155
1532	Q61865	Q61865	Melanoma-derived growth regulatory protein	Mia	14.593	8.89836	4		0.0950818	0.934394	-0.146231	28.8546	28.7083	5	5	28.5881	29.8814	29.3953	28.3509	28.0571	28.5722	28.6438	28.9839	27.2484	30.0933
1533	Q61879	Q61879	Myosin-10	Myh10	228.99	9.54427	144		0.361043	0.901756	-0.0902603	35.4603	35.37	5	5	35.5592	35.558	35.602	35.2697	35.3125	35.511	35.3737	35.1079	35.2726	35.5849
1534	Q61881	Q61881	DNA replication licensing factor MCM7	Mcm7	81.21	9.09559	30		0.0199033	0.992316	0.0091732	32.4157	32.4248	5	5	32.1885	32.5122	32.5377	32.2322	32.6077	32.4231	32.3786	31.9791	32.5451	32.7983
1535	Q61937	Q61937	Nucleophosmin	Npm1	32.56	10.4579	32		0.920846	0.466669	0.501014	35.1271	35.6281	5	5	34.4878	35.0496	35.429	35.7036	34.9655	35.1118	35.7528	36.074	35.9952	35.2066
1536	Q61941	Q61941	NAD(P) transhydrogenase, mitochondrial	Nnt	113.84	8.52321	21		0.454549	0.781573	0.223908	30.7932	31.0171	5	5	30.5224	30.9882	30.633	30.5081	31.3144	31.2089	30.8155	30.5405	31.4948	31.0258
1537	Q61990;P57722	Q61990	Poly(rC)-binding protein 2	Pcbp2	38.221	9.6583	17		0.737998	0.655115	0.274853	32.9192	33.1941	5	5	32.4693	32.8801	33.1217	33.0339	33.0913	32.8548	33.1909	33.0808	33.7307	33.1133
1538	Q62000	Q62000	Mimecan	Ogn	34.012	9.85324	17		0.0253872	0.992541	0.0151855	33.596	33.6112	5	5	33.9479	33.8445	33.2245	33.6341	33.3294	33.1887	33.8675	34.0331	33.445	33.5218
1539	Q62009	Q62009	Periostin	Postn	93.142	10.5531	70		0.216542	0.950923	0.0448067	37.3549	37.3997	5	5	37.4632	37.1335	37.3059	37.3833	37.4884	37.4006	37.4799	37.5549	37.2733	37.2896
1540	Q62018	Q62018	RNA polymerase-associated protein CTR9 homolog	Ctr9	133.41	7.53548	6		0.964213	0.465928	-0.475412	28.0501	27.691	5	3	27.5606	28.2385	27.972	28.1987	28.2808	27.1119	27.6888	27.2266	27.4549	28.3914
1542	Q62059	Q62059	Versican core protein	Vcan	366.78	8.65314	31		0.331734	0.864406	0.155325	32.6267	32.782	5	5	32.6938	32.1545	32.5163	33.2255	32.5432	32.8567	33.0257	32.816	32.8176	32.394
1543	Q62077	Q62077	1-phosphatidylinositol 4,5-bisphosphate phosphodiesterase gamma-1	Plcg1	149.67	7.37003	9	+	2.56275	0.0312821	-1.19498	27.9497	NaN	5	0	27.6553	27.8168	28.3853	27.6796	28.2113	26.3805	27.64	26.2987	26.7149	26.7394
1546	Q62093	Q62093	Serine/arginine-rich splicing factor 2	Srsf2	25.476	9.09423	10		1.05975	0.286832	0.892955	29.716	30.6089	5	5	30.3636	29.969	30.1257	29.5847	28.5369	30.4506	30.4196	30.5959	29.7858	31.7927
1547	Q62095	Q62095	ATP-dependent RNA helicase DDX3Y	Ddx3y	73.427	8.51779	47		1.38117	0.46692	0.355242	30.5851	30.9403	5	5	30.4918	30.6188	30.8994	30.105	30.8105	31.044	30.932	30.8006	30.8984	31.0266
1548	Q62159	Q62159	Rho-related GTP-binding protein RhoC	Rhoc	22.006	9.14693	10		0.253092	0.796348	-0.490226	30.0262	29.5359	5	5	31.4072	31.2793	30.0895	28.8336	28.5212	30.7716	28.3756	28.1495	30.0119	30.371
1549	Q62165	Q62165	Dystroglycan;Alpha-dystroglycan;Beta-dystroglycan	Dag1	96.904	8.46349	7		1.68026	0.210326	0.672089	30.0221	30.6942	5	5	30.2137	30.2457	30.5191	29.7618	29.3701	30.7227	30.6792	30.4327	31.1107	30.5254
1550	Q62167;P16381	Q62167;P16381	ATP-dependent RNA helicase DDX3X;Putative ATP-dependent RNA helicase Pl10	Ddx3x;D1Pas1	73.101	9.48565	52		0.333748	0.887806	-0.113	33.8366	33.7236	5	5	34.0565	34.0243	33.8212	33.5165	33.7646	33.599	33.5236	33.5211	33.9407	34.0337
1552	Q62186	Q62186	Translocon-associated protein subunit delta	Ssr4	18.936	9.80901	4		0.275296	0.823822	-0.295006	32.0997	31.8047	5	5	32.4934	32.5229	32.3603	31.1998	31.9221	32.6096	31.1207	30.7046	32.3235	32.2651
1553	Q62188	Q62188	Dihydropyrimidinase-related protein 3	Dpysl3	61.936	8.97606	28		0.219033	0.909849	-0.0954697	31.7093	31.6138	5	5	31.6032	31.4339	31.3089	32.2097	31.9906	31.5302	31.6135	31.5645	31.8029	31.558
1555	Q62193	Q62193	Replication protein A 32 kDa subunit	Rpa2	29.718	8.99645	9		0.256022	0.874809	0.174652	30.6118	30.7864	5	5	30.7267	30.6325	30.1574	31.377	30.1653	30.2702	30.9053	31.3073	30.8656	30.5838
1556	Q62203	Q62203	Splicing factor 3A subunit 2	Sf3a2	49.911	9.15725	12		1.40261	0.234511	0.738442	30.7126	31.451	5	5	30.8893	31.0825	31.3926	30.1439	30.0545	31.3838	31.4841	31.633	31.8082	30.9461
1557	Q62219	Q62219	Transforming growth factor beta-1-induced transcript 1 protein	Tgfb1i1	50.1	8.14214	8		0.842136	0.509586	0.427298	28.6508	29.078	5	5	28.7964	28.8718	29.2999	28.2723	28.0133	28.9378	29.2294	29.3552	28.6264	29.2414
1558	Q62234	Q62234	Myomesin-1	Myom1	185.46	8.65968	44		0.0619845	0.968022	0.076041	32.1965	32.2726	5	5	33.2085	32.6145	31.4827	32.2353	31.4415	32.9354	32.3234	31.2375	32.3288	32.5375
1559	Q62261;P15508	Q62261	Spectrin beta chain, non-erythrocytic 1	Sptbn1	274.22	9.26257	136		0.013045	0.995328	-0.00732727	34.9142	34.9069	5	5	35.0995	35.1017	34.9154	34.6798	34.7748	35.1437	34.7973	34.2808	35.2047	35.108
1562	Q62318	Q62318	Transcription intermediary factor 1-beta	Trim28	88.846	9.98555	54		0.614349	0.875383	0.10461	35.1881	35.2927	5	5	35.1745	35.148	35.3431	35.1847	35.09	35.1459	35.3632	35.297	35.1374	35.5199
1563	Q62348	Q62348	Translin	Tsn	26.201	8.99098	8		0.353311	0.791885	-0.26302	30.6233	30.3603	5	5	30.3951	30.4695	31.4815	30.0842	30.6861	30.7649	29.6982	29.9829	30.4845	30.8709
1566	Q62376	Q62376	U1 small nuclear ribonucleoprotein 70 kDa	Snrnp70	51.991	9.13373	10		1.72096	0.208207	0.6688	31.2367	31.9055	5	5	31.046	31.1261	31.6255	30.8917	31.4942	32.0325	32.0943	32.4057	31.6036	31.3915
1567	Q62383	Q62383	Transcription elongation factor SPT6	Supt6h	199.08	7.8528	19		1.32319	0.687843	-0.188142	29.6217	29.4336	5	5	29.653	29.5519	29.6312	29.6881	29.5845	29.1543	29.6043	29.4529	29.5338	29.4226
1568	Q62384	Q62384	Zinc finger protein ZPR1	Zpr1	50.714	7.96038	8		0.357079	0.794419	0.252017	28.2359	28.2714	4	5	28.0457	28.1317	28.0634	28.7028	27.1533	27.7033	27.96	28.6066	28.485	28.6021
1570	Q62394	Q62394	Zinc finger protein 185	Znf185	38.322	8.74556	8		0.263384	0.875144	0.178858	30.2125	30.3913	5	5	30.8409	30.2645	29.9506	30.5249	29.4816	30.9394	30.4074	30.3343	30.3295	29.9461
1571	Q62417	Q62417	Sorbin and SH3 domain-containing protein 1	Sorbs1	143.07	7.28852	9	+	4.19337	0.00294737	-1.72811	27.9955	NaN	5	0	28.2662	27.7381	28.5193	27.9028	27.5509	26.3522	25.7697	26.5799	26.1429	26.492
1572	Q62418	Q62418	Drebrin-like protein	Dbnl	48.699	8.7658	10		0.248228	0.904537	0.109052	30.5612	30.6703	5	5	30.7803	30.56	30.6069	30.7455	30.1132	30.1833	30.5959	30.9779	30.748	30.8462
1573	Q62419;Q62420;Q62421	Q62419	Endophilin-A2	Sh3gl1	41.518	8.99428	16		1.1213	0.250074	0.99621	30.4527	31.4489	5	5	30.3012	30.7023	31.7815	29.5486	29.93	31.0382	31.4703	31.4025	32.55	30.7836
1574	Q62422	Q62422	Osteoclast-stimulating factor 1	Ostf1	23.782	8.38824	4		0.959347	0.295839	1.04762	28.546	28.8372	3	5	28.0937	28.2331	29.3113	26.4044	26.9054	28.8125	28.8656	29.7073	27.9874	28.8132
1575	Q62426	Q62426	Cystatin-B	Cstb	11.045	8.49196	4		0.310781	0.800583	0.291166	27.9083	28.555	5	4	27.721	28.2203	28.3392	27.7023	27.5588	28.3171	28.5403	28.9301	28.4324	26.7776
1577	Q62433	Q62433	Protein NDRG1	Ndrg1	43.008	9.21277	10		0.701145	0.591529	0.366821	31.1724	31.5392	5	5	31.5028	31.119	30.9647	31.1977	31.0776	31.0644	31.7543	32.3692	31.0484	31.4596
1578	Q62446	Q62446	Peptidyl-prolyl cis-trans isomerase FKBP3	Fkbp3	25.147	8.7567	6		1.56714	0.166256	0.899394	28.9932	29.8926	5	5	28.6226	29.4795	29.8072	28.3341	28.7225	29.7415	29.5489	30.2015	30.4449	29.526
1579	Q62448	Q62448	Eukaryotic translation initiation factor 4 gamma 2	Eif4g2	102.1	8.03076	15		0.383823	0.814599	-0.202215	29.3623	29.16	5	5	29.3484	29.5606	29.553	28.7165	29.6327	29.5519	29.5489	28.8625	29.0228	28.8141
1580	Q62465	Q62465	Synaptic vesicle membrane protein VAT-1 homolog	Vat1	43.096	9.16453	14		0.0559053	0.986475	0.0242851	31.3428	31.3671	5	5	31.4007	31.4063	31.5797	30.8495	31.4777	31.4833	31.3362	31.1231	31.2625	31.6302
1582	Q62513	Q62513	Zinc finger protein 260	Znf260	46.442	8.26479	7		0.110374	0.918265	-0.200888	28.2779	29.2651	5	2	28.9164	29.1051	27.2211	27.6779	28.469	27.3735	26.7425	28.41	30.1202	27.739
1583	Q62523	Q62523	Zyxin	Zyx	60.545	7.90227	5		0.013266	0.992995	-0.0169662	27.6912	27.9083	4	4	27.3971	27.1106	27.804	28.0065	27.5571	27.5045	27.7904	26.1571	28.6936	27.6449
1586	Q63844;Q6P5G0;Q61532	Q63844	Mitogen-activated protein kinase 3	Mapk3	43.066	8.17924	11		0.745366	0.561482	-0.411711	28.741	28.3293	5	5	28.4168	28.9985	28.6214	29.0144	28.6541	28.9569	28.4488	27.4414	28.1827	28.6167
1587	Q63850	Q63850	Nuclear pore glycoprotein p62	Nup62	53.254	8.71756	7		0.734257	0.468779	0.688404	29.048	29.7364	5	5	28.9324	29.5623	29.2476	29.6416	27.856	29.2333	30.5553	30.5467	29.4785	28.8681
1588	Q63918	Q63918	Serum deprivation-response protein	Sdpr	46.763	7.96838	6	+	2.24263	0.0169796	2.64531	NaN	29.4364	0	4	25.6603	26.507	27.2918	26.6547	25.0937	29.5927	29.7338	29.8253	28.5937	26.6884
1589	Q63932	Q63932	Dual specificity mitogen-activated protein kinase kinase 2	Map2k2	44.402	8.43492	10		0.637849	0.723515	0.234401	29.4143	29.6487	5	5	29.4058	29.1235	29.7296	29.5748	29.2378	29.6472	29.6253	30.0346	29.7812	29.1552
1590	Q64008	Q64008	Ras-related protein Rab-34	Rab34	29.1	8.07273	7		1.01002	0.269815	-1.07489	28.0688	27.6759	5	3	28.1762	27.4202	27.9349	27.9545	28.858	27.6818	25.3721	26.8717	26.5695	28.4742
1591	Q64012	Q64012	RNA-binding protein Raly	Raly	33.188	8.83164	13		0.47547	0.761784	-0.247809	30.5511	30.3033	5	5	30.4374	30.9198	30.53	29.9874	30.8808	30.1192	29.9073	30.0619	30.7523	30.6757
1592	Q640N1	Q640N1	Adipocyte enhancer-binding protein 1	Aebp1	128.36	9.09374	27		0.930013	0.652854	-0.248545	32.8358	32.5873	5	5	33.0222	32.9779	32.55	32.7995	32.8295	32.6953	32.2636	32.3631	32.8112	32.8033
1593	Q640P2	Q640P2	Angiopoietin-related protein 1	Angptl1	56.322	8.49955	12		0.282572	0.866883	0.174959	30.1124	30.2874	5	5	29.938	30.1932	30.0916	30.1994	30.1399	29.9578	30.562	30.4879	30.9505	29.4787
1594	Q64105	Q64105	Sepiapterin reductase	Spr	27.883	8.502	11		0.223646	0.873704	0.210268	28.9518	29.1621	5	5	28.8	28.851	28.8469	29.4142	28.847	28.1847	29.4993	30.0908	29.6027	28.433
1595	Q64133	Q64133	Amine oxidase [flavin-containing] A	Maoa	59.601	7.88565	5		1.94258	0.0580606	-1.3905	28.4102	28.1267	5	1	28.3559	29.2825	28.0169	27.8915	28.5042	27.3424	26.537	26.0899	27.0024	28.1267
1596	Q64152	Q64152	Transcription factor BTF3	Btf3	22.031	8.78186	6		0.854184	0.377931	0.857261	28.919	29.7763	5	5	27.8099	28.8639	30.1189	28.365	29.4374	30.2647	29.6013	30.2307	30.2451	28.5397
1597	Q64213	Q64213	Splicing factor 1	Sf1	70.402	8.09093	6		0.688548	0.534457	-0.511392	27.2245	NaN	5	0	26.9029	27.303	27.7161	27.0917	27.1089	26.0911	27.5013	27.605	26.196	26.1724
1599	Q64310	Q64310	Surfeit locus protein 4	Surf4	30.381	8.38088	4		0.994148	0.293019	-0.988777	28.4898	28.4531	5	2	28.5419	28.985	28.5466	27.9509	28.4249	28.9863	27.7544	27.9199	26.864	25.9808
1600	Q64314	Q64314	Hematopoietic progenitor cell antigen CD34	Cd34	40.982	8.90439	4		0.712755	0.493956	0.558569	29.8621	30.4207	5	5	30.2997	30.8757	29.9958	29.1874	28.952	30.1152	30.8749	30.4098	29.9837	30.7199
1602	Q64337	Q64337	Sequestosome-1	Sqstm1	48.162	8.21614	6		0.0519826	0.969551	-0.0907272	28.2622	28.5921	5	4	28.5544	29.2662	28.483	28.2713	26.736	29.1261	26.4885	28.4411	28.0244	28.777
1603	Q64378	Q64378	Peptidyl-prolyl cis-trans isomerase FKBP5;Peptidyl-prolyl cis-trans isomerase FKBP5, N-terminally processed	Fkbp5	50.966	8.91194	19		2.30231	0.236463	0.477048	31.2807	31.7577	5	5	30.9968	31.3063	31.398	31.1783	31.5241	32.049	31.5872	31.5907	31.812	31.7499
1604	Q64433	Q64433	10 kDa heat shock protein, mitochondrial	Hspe1	10.963	8.55246	7		0.832026	0.393074	0.844527	28.0349	28.8794	5	5	27.7073	27.9059	28.4263	28.3064	27.8285	28.7522	29.9687	30.1146	27.7394	27.8221
1605	Q64449	Q64449	C-type mannose receptor 2	Mrc2	167.07	9.10281	39		1.70022	0.32829	-0.461375	33.3156	32.8542	5	5	33.3671	33.3966	33.2491	33.4555	33.1095	33.0429	32.9374	32.3347	32.7681	33.1879
1606	Q6ZWY9;Q64478;Q64525;P10854	Q6ZWY9;Q64478;Q64525;P10854	Histone H2B type 1-C/E/G;Histone H2B type 1-H;Histone H2B type 2-B;Histone H2B type 1-M	Hist1h2bc;Hist1h2bh;Hist2h2bb;Hist1h2bm	13.906	9.8183	22		1.66912	0.0606602	1.87768	31.0155	32.8932	5	5	29.5542	30.0913	32.8266	30.5591	32.0464	32.9423	33.0557	33.391	33.0871	31.9899
1607	Q64511	Q64511	DNA topoisomerase 2-beta	Top2b	181.91	8.58358	51		0.220511	0.898243	-0.137009	32.0352	31.8982	5	5	31.8781	32.3762	32.3732	31.1885	32.3601	31.9409	31.5819	31.8003	31.9988	32.1692
1608	Q64514	Q64514	Tripeptidyl-peptidase 2	Tpp2	139.88	8.42193	25		0.205606	0.930067	-0.0644802	31.0215	30.957	5	5	31.0087	30.9266	31.2096	30.909	31.0537	31.0732	30.7641	30.6845	31.3236	30.9399
1610	Q64519	Q64519	Syndecan-3	Sdc3	46.001	8.40987	1		0.505994	0.688537	-0.350398	28.6776	28.6307	5	4	28.6063	28.8679	28.6141	28.7014	28.5984	28.5652	28.6375	28.3374	27.1135	28.9825
1612	Q64521	Q64521	Glycerol-3-phosphate dehydrogenase, mitochondrial	Gpd2	80.953	7.97892	10		0.518755	0.690817	-0.33247	29.2787	28.9462	5	5	29.8642	29.2378	28.4297	29.6745	29.1872	28.483	28.6842	29.4836	29.0813	28.9988
1613	Q64523;Q6GSS7;Q64522	Q64523;Q6GSS7;Q64522	Histone H2A type 2-C;Histone H2A type 2-A;Histone H2A type 2-B	Hist2h2ac;Hist2h2aa1;Hist2h2ab	13.988	9.00996	9		0.00224437	0.99686	0.00575752	29.5067	28.8473	4	5	30.3214	30.6516	29.1254	26.1807	27.9284	29.3018	28.231	28.3752	29.6406	28.6877
1615	Q64674	Q64674	Spermidine synthase	Srm	33.995	9.79727	25		0.207747	0.882143	-0.197295	33.7383	33.541	5	5	33.3739	33.2689	33.7534	34.4826	33.8129	33.3143	33.6475	34.6251	32.6664	33.4518
1616	Q64727	Q64727	Vinculin	Vcl	116.72	9.10877	64		2.59965	0.154653	0.568309	33.2401	33.8084	5	5	33.353	33.3283	33.5581	32.9912	32.97	33.6454	33.8015	33.8331	34.0396	33.7225
1617	Q64737	Q64737	Trifunctional purine biosynthetic protein adenosine-3;Phosphoribosylamine--glycine ligase;Phosphoribosylformylglycinamidine cyclo-ligase;Phosphoribosylglycinamide formyltransferase	Gart	107.5	9.10619	38		0.034595	0.989715	-0.0150703	32.8978	32.8827	5	5	32.7869	32.5636	32.8735	33.0931	33.1719	32.5292	32.9622	32.9944	33.1468	32.7811
1618	Q64739	Q64739	Collagen alpha-2(XI) chain	Col11a2	171.53	9.68401	44		0.152887	0.909619	0.133641	35.4434	35.577	5	5	35.6647	35.8821	36.0348	34.4047	35.2305	35.8337	35.0269	35.335	35.7943	35.8951
1620	Q66K08	Q66K08	Cartilage intermediate layer protein 1;Cartilage intermediate layer protein 1 C1;Cartilage intermediate layer protein 1 C2	Cilp	132.33	7.95228	14		0.057807	0.957966	-0.228736	26.7672	NaN	5	0	32.2183	25.814	25.2521	25.2541	25.2974	25.2911	27.2174	27.2499	26.4997	26.434
1621	Q66PY1	Q66PY1	Signal peptide, CUB and EGF-like domain-containing protein 3	Scube3	108.98	8.13316	9		0.177333	0.903278	0.134423	29.4339	29.5684	5	5	29.3616	29.5351	30.3322	28.7204	29.2203	29.3745	29.1774	29.9302	29.5029	29.8568
1622	Q68FD5	Q68FD5	Clathrin heavy chain 1	Cltc	191.55	9.51495	85		0.635718	0.687555	-0.279226	35.1876	34.9084	5	5	35.2979	35.3903	35.2569	34.7677	35.2254	35.4738	34.6991	34.3978	34.816	35.1553
1623	Q68FF6	Q68FF6	ARF GTPase-activating protein GIT1	Git1	85.299	7.47159	4		0.169824	0.896283	0.193349	27.1375	27.2049	4	5	27.3677	27.6296	26.5077	26.324	27.2289	27.2882	26.1164	26.7035	27.7091	28.2075
1624	Q68FH4	Q68FH4	N-acetylgalactosamine kinase	Galk2	50.503	8.37125	11		0.639735	0.765567	0.193915	29.2023	29.3963	5	5	29.2974	29.2056	28.963	29.4425	29.1033	28.9467	29.3632	29.5231	29.4571	29.6912
1625	Q68FL6	Q68FL6	Methionine--tRNA ligase, cytoplasmic	Mars	101.43	8.44588	20		0.252897	0.857663	-0.233766	30.5015	30.2678	5	5	30.7797	31.0716	30.636	29.9011	30.1193	31.3291	29.9269	30.1046	29.4493	30.529
1626	Q69Z99	Q69Z99	Zinc finger protein 512	Znf512	63.908	8.01254	6		0.31727	0.766218	-0.450272	28.2194	28.4671	5	3	27.7291	27.8845	27.7261	28.8431	28.914	26.1921	27.252	28.2108	27.6829	29.5077
1627	Q69ZN7	Q69ZN7	Myoferlin	Myof	233.32	7.70542	17		0.198181	0.888422	-0.190876	29.4586	29.2677	5	5	29.6192	30.2457	29.4729	28.6173	29.3377	30.1973	28.9552	28.6334	29.62	28.9326
1630	Q6A026	Q6A026	Sister chromatid cohesion protein PDS5 homolog A	Pds5a	150.33	8.08803	15		0.580081	0.572603	0.557238	29.4562	30.0135	5	5	30.1321	30.4912	29.5954	28.4107	28.6517	30.612	30.0124	30.3243	29.3059	29.8127
1631	Q6A028	Q6A028	Switch-associated protein 70	Swap70	68.995	8.59343	19		0.316955	0.876086	-0.137556	30.9364	30.7988	5	5	31.1135	31.0221	30.9856	30.5637	30.9969	30.8348	30.3645	30.5198	31.2253	31.0496
1633	Q6A068	Q6A068	Cell division cycle 5-like protein	Cdc5l	92.188	8.70481	27		0.831507	0.458409	0.590429	30.8856	31.476	5	5	30.4733	31.3108	32.0218	30.1353	30.4865	31.6542	31.3634	31.5361	31.794	31.0322
1634	Q6A0A9	Q6A0A9	Constitutive coactivator of PPAR-gamma-like protein 1	FAM120A	121.64	8.66041	28		0.325998	0.863997	0.163733	31.5004	31.6641	5	5	31.6092	31.6205	31.6811	30.8988	31.6925	31.985	31.3225	31.2839	32.0043	31.725
1635	Q6A4J8	Q6A4J8	Ubiquitin carboxyl-terminal hydrolase 7	Usp7	128.47	8.41609	28		0.0301007	0.992935	-0.00917358	31.0282	31.019	5	5	30.829	31.1377	30.9618	31.0955	31.117	31.1925	31.0686	30.6941	30.9922	31.1477
1636	Q6AW69	Q6AW69	Cingulin-like protein 1	Cgnl1	148.23	7.77687	9		0.601523	0.653302	0.350616	29.1241	29.4747	5	5	28.9539	29.0481	29.4462	29.2229	28.9494	29.8599	29.9995	29.3891	29.6329	28.4921
1638	Q6DFW4	Q6DFW4	Nucleolar protein 58	Nop58	60.342	8.82441	14		0.168969	0.913569	0.106874	30.8392	30.9461	5	5	30.2279	30.6795	31.3246	30.5617	31.4024	30.8997	31.1509	31.1002	30.9932	30.5865
1639	Q6DIC0	Q6DIC0	Probable global transcription activator SNF2L2	Smarca2	180.25	7.08019	10		0.747109	0.580617	-0.380076	27.1623	NaN	4	0	26.5944	27.7282	27.3191	26.8526	26.7494	26.8673	26.5657	26.3131	27.1539	26.4434
1640	Q6DID3;Q7TSH6	Q6DID3;Q7TSH6	Protein SCAF8	Scaf8;Scaf4	139.57	7.64732	3		0.111623	0.946238	0.0785603	27.6846	27.6805	5	4	27.1496	27.5693	27.9543	27.3229	28.4268	27.4574	27.8868	27.9208	28.0938	27.4569
1641	Q6EDY6	Q6EDY6	Leucine-rich repeat-containing protein 16A	Lrrc16a	151.86	7.43422	6		0.261361	0.850117	0.240932	27.6258	27.8667	5	5	27.5086	27.6842	28.8609	27.3245	26.7509	28.1284	27.5907	27.4567	28.3498	27.8081
1643	Q6GQT9	Q6GQT9	Nodal modulator 1	Nomo1	133.42	8.28858	19		2.54282	0.154974	-0.576274	30.8522	30.2759	5	5	31.0546	30.8731	30.9302	30.5787	30.8244	30.6122	30.0825	29.9881	30.305	30.3918
1644	Q6GU68	Q6GU68	Immunoglobulin superfamily containing leucine-rich repeat protein	Islr	45.614	8.94963	9		1.7903	0.188751	-0.694052	31.1604	30.4663	5	5	31.3841	31.3092	30.4601	31.6205	31.0281	30.2351	30.5983	30.3471	30.3055	30.8456
1646	Q6IRU2	Q6IRU2	Tropomyosin alpha-4 chain	Tpm4	28.467	9.94629	34		1.65127	0.12693	1.0438	33.4086	34.4524	5	5	33.7508	33.5177	34.2801	33.1958	32.2988	34.6425	34.5289	34.4196	34.8329	33.8383
1650	Q6NS46	Q6NS46	Protein RRP5 homolog	Pdcd11	207.78	8.05358	10	+	4.64372	0	-3.02132	30.4751	NaN	5	0	29.8982	30.6873	30.5484	29.9727	31.2687	27.4637	28.3449	27.2939	27.189	26.9772
1651	Q6NSR8	Q6NSR8	Probable aminopeptidase NPEPL1	Npepl1	55.939	7.67824	4		0.445818	0.688868	0.425784	NaN	26.4685	0	4	26.931	25.816	26.451	26.2368	26.707	26.525	26.4937	26.2124	26.6431	28.3966
1652	Q6NV83	Q6NV83	U2 snRNP-associated SURP motif-containing protein	U2surp	118.26	8.59042	17		0.786436	0.666158	0.256791	30.7517	31.0084	5	5	30.8477	30.881	30.9188	30.3045	30.8063	31.2725	31.2368	30.8725	31.0534	30.607
1653	Q6NVF9	Q6NVF9	Cleavage and polyadenylation specificity factor subunit 6	Cpsf6	59.152	8.72198	4		0.247133	0.897553	0.121284	30.1637	30.285	5	5	30.2264	30.179	29.5409	30.2268	30.6455	30.1452	30.3339	30.0347	30.6144	30.2968
1654	Q6NVG7	Q6NVG7	Procollagen galactosyltransferase 2	Colgalt2	72.787	9.35877	25		0.870436	0.66852	-0.238374	33.1078	32.8695	5	5	32.9767	32.9089	32.9927	33.4223	33.2386	32.5147	33.0233	32.9238	33.1179	32.7675
1655	Q6NWW9	Q6NWW9	Fibronectin type III domain-containing protein 3B	Fndc3b	132.76	8.50947	10		0.179972	0.925571	-0.0755795	30.8301	30.7545	5	5	30.4599	31.058	30.9177	30.6196	31.0952	30.9638	30.8079	30.6413	30.9698	30.3896
1657	Q6NZC7	Q6NZC7	SEC23-interacting protein	Sec23ip	110.78	9.33254	33		0.684602	0.794689	-0.154568	33.4076	33.253	5	5	33.3303	33.2059	33.4214	33.6942	33.3863	33.1686	33.5297	33.152	33.0942	33.3207
1658	Q6NZF1	Q6NZF1	Zinc finger CCCH domain-containing protein 11A	Zc3h11a	86.491	7.83613	8		0.0768383	0.959045	-0.0900414	28.4816	28.8788	5	3	28.7396	28.9842	28.3856	27.7767	28.5218	27.0855	28.4236	28.9525	28.2358	29.2604
1659	Q6NZJ6	Q6NZJ6	Eukaryotic translation initiation factor 4 gamma 1	Eif4g1	176.07	8.79018	32		0.123202	0.935088	0.0902935	32.1135	32.2038	5	5	32.5086	32.4443	32.4428	31.2723	31.8996	32.7199	31.9943	31.9397	32.0626	32.3025
1663	Q6P069	Q6P069	Sorcin	Sri	21.627	8.59808	6		1.1048	0.326488	0.712728	28.8595	29.5722	5	5	28.285	28.552	29.3001	29.4432	28.7173	29.4598	30.2367	30.0911	29.3711	28.7024
1664	Q6P1B1;E9Q286	Q6P1B1	Xaa-Pro aminopeptidase 1	Xpnpep1	69.59	8.88002	24		0.0212789	0.993811	0.0109428	31.6963	31.7072	5	5	31.8844	31.4915	31.6444	31.6575	31.8037	31.2599	32.0384	32.0792	31.7403	31.4185
1666	Q6P1F6;Q6ZWR4;Q8BG02	Q6P1F6	Serine/threonine-protein phosphatase 2A 55 kDa regulatory subunit B alpha isoform	Ppp2r2a	51.691	8.98494	19		0.710482	0.70918	0.229419	31.4835	31.7129	5	5	31.4299	31.2595	31.5559	31.8078	31.3643	31.4386	31.7912	32.1824	31.5096	31.6428
1668	Q6P2L7	Q6P2L7	Protein CASC4	Casc4	49.408	8.37736	10		0.121076	0.918107	0.144282	29.1671	29.3114	5	5	29.3492	30.1597	29.809	28.3932	28.1246	28.9163	29.2798	28.7982	29.5928	29.9701
1670	Q6P4T2	Q6P4T2	U5 small nuclear ribonucleoprotein 200 kDa helicase	Snrnp200	244.54	8.67237	65		0.368601	0.799127	-0.231768	32.7023	32.4706	5	5	32.8269	33.1934	32.907	32.2388	32.3455	33.0311	32.4939	32.2568	31.8	32.7709
1671	Q6P542	Q6P542	ATP-binding cassette sub-family F member 1	Abcf1	94.944	8.30207	13		0.372168	0.829036	-0.191938	29.9461	29.7541	5	5	29.3726	29.9668	30.082	29.9349	30.374	29.4837	29.6115	29.8453	30.3368	29.4934
1672	Q6P5B0	Q6P5B0	RRP12-like protein	Rrp12	143.13	8.34128	3		0.854169	0.339813	-1.07844	30.9421	29.8636	5	5	31.3806	31.7492	30.5999	30.3277	30.6529	30.7336	28.9325	27.9762	30.5596	31.1164
1673	Q6P5D3	Q6P5D3	Putative ATP-dependent RNA helicase DHX57	Dhx57	155.76	7.0408	3		1.25477	0.197724	1.09011	NaN	27.851	0	4	26.4115	26.1883	26.7852	25.3816	27.7334	26.5464	27.3839	27.7069	28.142	28.1713
1674	Q6P5D8	Q6P5D8	Structural maintenance of chromosomes flexible hinge domain-containing protein 1	Smchd1	225.65	7.93961	23		0.0189446	0.993102	-0.00960388	30.2271	30.2175	5	5	30.0531	30.3429	30.481	30.01	30.2488	30.6316	29.8029	30.4482	29.9881	30.217
1675	Q6P5E4	Q6P5E4	UDP-glucose:glycoprotein glucosyltransferase 1	Uggt1	176.43	8.96755	53		1.48348	0.471493	-0.335118	33.1839	32.8488	5	5	32.8553	33.2291	33.2348	33.1845	33.4158	32.9245	32.735	32.5449	32.9821	33.0573
1676	Q6P5E6;Q8BMI3	Q6P5E6	ADP-ribosylation factor-binding protein GGA2	Gga2	66.048	8.24095	9		0.0192904	0.989895	-0.0333515	28.9532	28.9198	5	5	30.0072	30.0014	28.8185	27.1122	28.8265	28.9335	28.8159	28.3178	28.6354	29.8965
1677	Q6P5F9	Q6P5F9	Exportin-1	Xpo1	123.09	8.51758	22		0.332872	0.855027	-0.17077	31.0521	30.8814	5	5	30.8003	31.3722	31.2108	30.8212	31.0562	31.5657	30.9359	30.4125	30.6534	30.8394
1679	Q6P5H2	Q6P5H2	Nestin	Nes	207.12	8.4116	25		0.718898	0.476402	0.611845	31.0425	31.6543	5	5	31.6522	31.6161	31.1658	30.9764	29.8019	32.0654	32.4314	31.2266	31.5614	30.9867
1682	Q6P8J7;P30275	Q6P8J7	Creatine kinase S-type, mitochondrial	Ckmt2	47.473	7.86958	6	+	2.89421	0.0125333	1.6534	NaN	28.0535	0	5	26.617	26.4254	26.8451	25.8164	26.2968	28.6672	28.0267	27.7181	27.1506	28.7051
1683	Q6P8X1	Q6P8X1	Sorting nexin-6;Sorting nexin-6, N-terminally processed	Snx6	46.648	8.77264	17		0.979626	0.44545	0.500253	30.559	31.0592	5	5	30.8729	29.7852	31.0891	30.534	30.5136	31.2036	31.0723	30.9638	31.5197	30.5367
1686	Q6P9Q6	Q6P9Q6	FK506-binding protein 15	Fkbp15	132.96	7.79031	7		0.287074	0.798228	0.34321	28.9349	28.8673	4	5	28.9765	26.881	29.6291	28.9011	28.2331	28.5359	28.7761	28.4352	29.5044	29.0851
1687	Q6P9R2	Q6P9R2	Serine/threonine-protein kinase OSR1	Oxsr1	58.213	8.48557	12		0.182162	0.929374	0.069199	29.9148	29.984	5	5	30.1881	30.1757	29.7946	29.5348	29.8806	30.1381	29.9272	30.0157	29.6823	30.1565
1691	Q6PB44	Q6PB44	Tyrosine-protein phosphatase non-receptor type 23	Ptpn23	185.21	7.4733	8		0.352464	0.767651	-0.342751	28.0585	28.0951	5	4	27.8481	27.8495	27.6842	28.3873	28.5232	27.9285	28.4273	27.8624	28.1622	26.1983
1692	Q6PB66	Q6PB66	Leucine-rich PPR motif-containing protein, mitochondrial	Lrpprc	156.61	8.1873	38		0.0197839	0.993245	-0.0100403	30.6713	30.6613	5	5	30.4968	30.508	30.9088	30.3491	31.0938	30.7996	30.4344	30.3876	30.8288	30.8559
1693	Q6PB93	Q6PB93	Polypeptide N-acetylgalactosaminyltransferase 2;Polypeptide N-acetylgalactosaminyltransferase 2 soluble form	Galnt2	64.514	7.79364	3		0.05373	0.968741	0.102472	28.2027	28.1604	3	4	26.8793	27.949	28.1544	26.6293	28.5048	29.0773	25.9874	27.2133	28.8736	27.4775
1696	Q6PDG5	Q6PDG5	SWI/SNF complex subunit SMARCC2	Smarcc2	132.6	9.00441	33		1.04329	0.417242	0.527143	32.376	32.9032	5	5	32.3895	32.7569	33.1028	32.0363	31.5945	32.651	32.8425	33.0075	32.9817	33.0332
1698	Q6PDI5	Q6PDI5	Proteasome-associated protein ECM29 homolog	Ecm29	203.7	7.42763	10		0.310489	0.793763	-0.317637	28.1788	28.3121	5	3	27.9207	28.7136	28.222	28.0653	27.9722	29.1991	27.1884	27.2662	27.181	28.4708
1699	Q6PDL0	Q6PDL0	Cytoplasmic dynein 1 light intermediate chain 2	Dync1li2	54.218	7.97381	5		1.78276	0.0726847	-1.39536	28.4639	28.694	5	1	28.5375	28.2681	28.0558	29.034	28.4243	26.6918	26.1252	26.964	26.868	28.694
1700	Q6PDM2	Q6PDM2	Serine/arginine-rich splicing factor 1	Srsf1	27.744	8.97031	7		1.09211	0.382888	0.573071	30.2899	30.863	5	5	29.8424	29.8067	31.0771	30.565	30.1585	30.3586	30.9613	31.3431	30.8659	30.7861
1701	Q6PDN3	Q6PDN3	Myosin light chain kinase, smooth muscle;Myosin light chain kinase, smooth muscle, deglutamylated form	Mylk	212.92	7.61938	10		0.714915	0.758113	-0.188989	29.1261	28.9371	5	5	28.906	28.9862	29.4229	29.0398	29.2755	29.1098	28.9278	29.0944	28.6017	28.9518
1702	Q6PDQ2;A2A8L1	Q6PDQ2	Chromodomain-helicase-DNA-binding protein 4	Chd4	217.75	8.76415	49		0.146174	0.918092	-0.112255	32.5295	32.4172	5	5	32.7352	33.1361	32.5129	31.7651	32.4981	32.8103	32.0552	31.8649	32.56	32.7957
1704	Q6PE01	Q6PE01	U5 small nuclear ribonucleoprotein 40 kDa protein	Snrnp40	39.275	9.47924	16		0.187397	0.918621	0.0821541	32.4931	32.5753	5	5	32.5718	32.2837	32.4777	32.73	32.4024	32.4379	32.702	32.9947	32.6847	32.0572
1705	Q6PE55	Q6PE55	Platelet-derived growth factor receptor-like protein	Pdgfrl	41.927	8.2222	6		0.293753	0.876519	0.154128	28.4654	28.6195	5	5	28.5642	28.419	28.7472	28.2083	28.3884	28.3362	28.4048	29.2965	28.1927	28.8675
1706	Q6PEB6	Q6PEB6	MOB-like protein phocein	Mob4	26.032	8.52812	5		0.704148	0.439171	-0.879369	29.0356	28.8067	5	3	29.6074	28.8864	28.7734	29.0568	28.854	29.9947	28.0569	26.1696	28.3684	28.1915
1707	Q6PFD9	Q6PFD9	Nuclear pore complex protein Nup98-Nup96;Nuclear pore complex protein Nup98;Nuclear pore complex protein Nup96	Nup98	197.24	7.9559	17		2.14922	0.215194	0.526445	29.4551	29.9815	5	5	29.5908	29.1107	29.7606	29.3257	29.4875	30.1104	29.9146	30.2871	29.7934	29.8021
1708	Q6PFR5	Q6PFR5	Transformer-2 protein homolog alpha	Tra2a	32.316	8.02053	5		0.014645	0.993331	0.0200211	28.0556	28.0076	4	4	26.5149	27.6983	27.8789	28.7957	27.8494	27.907	28.5134	28.128	27.4821	26.8069
1709	Q6PGB6	Q6PGB6	N-alpha-acetyltransferase 50	Naa50	19.414	8.80001	6		0.841507	0.432224	0.67465	29.4372	30.1118	5	5	29.5133	29.3811	30.104	29.1054	29.082	30.0144	30.8144	30.7308	30.2568	28.7427
1711	Q6PGH1	Q6PGH1	Protein BUD31 homolog	Bud31	17	8.72621	5		0.416613	0.701896	0.424861	28.7115	29.1364	5	5	28.8709	29.5222	29.741	27.7029	27.7205	29.5763	29.3074	29.0081	28.6275	29.1625
1715	Q6PHZ2	Q6PHZ2	Calcium/calmodulin-dependent protein kinase type II subunit delta	Camk2d	56.369	8.4411	9		0.240476	0.83172	-0.370736	29.9055	30.147	5	4	30.08	29.9435	30.0669	29.5739	29.8632	30.4503	30.2015	30.2949	29.6412	27.086
1717	Q6PIP5	Q6PIP5	NudC domain-containing protein 1	Nudcd1	66.704	8.43747	12		0.219274	0.903804	0.103997	29.8753	29.9793	5	5	29.6966	29.7982	29.7321	29.9796	30.1699	29.3887	29.9599	29.9273	30.2283	30.3922
1718	Q6Q477	Q6Q477	Calcium-transporting ATPase	Atp2b4	133.07	7.58221	9		0.644047	0.496383	-0.675695	27.6334	27.4795	5	3	28.1855	28.4004	27.3832	26.5946	27.6032	26.0177	26.8787	26.3322	27.2044	28.3554
1719	Q6Q899	Q6Q899	Probable ATP-dependent RNA helicase DDX58	Ddx58	105.97	7.57155	4		0.00620207	0.995469	-0.00951538	27.4203	28.0284	5	3	26.9376	27.1963	28.2835	27.5993	27.0847	28.0113	27.3062	28.0088	28.065	25.6625
1725	Q6W3F0	Q6W3F0	Prolyl 4-hydroxylase subunit alpha-3	P4ha3	60.974	8.93152	20		0.478215	0.792941	0.19131	31.1019	31.2932	5	5	30.5792	31.0493	31.5138	31.0388	31.3285	31.2935	31.456	31.5105	31.2464	30.9598
1727	Q6WVG3;Q5DTY9	Q6WVG3	BTB/POZ domain-containing protein KCTD12	Kctd12	35.892	9.37072	17		0.816153	0.476725	-0.531376	32.129	31.5977	5	5	32.5491	32.6548	31.7565	32.2449	31.4399	31.5766	31.2378	30.9875	31.7867	32.3997
1728	Q6Y5D8	Q6Y5D8	Rho GTPase-activating protein 10	Arhgap10	89.365	7.46498	4		0.777904	0.475679	0.541241	27.4837	27.9768	2	5	27.5029	26.9207	28.2798	27.0099	27.4645	28.4187	28.2912	27.9302	26.9816	28.2623
1731	Q6ZPJ3	Q6ZPJ3	E2/E3 hybrid ubiquitin-protein ligase UBE2O	Ube2o	140.83	7.22789	4		0.324483	0.841139	-0.194327	27.5293	NaN	4	0	27.1907	28.0202	27.3117	27.0949	27.8115	27.3993	27.761	27.2011	26.6507	27.4451
1732	Q6ZPU9	Q6ZPU9	KIF1-binding protein	Kbp	71.051	7.2686	4		0.00858835	0.997263	-0.00990715	27.5211	NaN	4	0	25.8954	27.5192	27.5973	27.6034	27.3644	26.5355	27.0524	27.0288	27.632	27.6815
1735	Q6ZQ08	Q6ZQ08	CCR4-NOT transcription complex subunit 1	Cnot1	266.8	6.93216	3		2.78429	0.0635048	-0.81458	27.2408	NaN	5	0	26.9434	27.1708	27.3912	27.2876	27.4108	26.5402	26.8183	26.0024	26.1434	26.6266
1737	Q6ZQ38	Q6ZQ38	Cullin-associated NEDD8-dissociated protein 1	Cand1	136.33	8.92877	48		0.655276	0.687886	-0.272448	32.7247	32.4522	5	5	32.6863	32.845	32.8633	32.3469	32.882	32.9617	32.305	32.0921	32.1124	32.7901
1738	Q6ZQ58	Q6ZQ58	La-related protein 1	Larp1	121.12	7.65645	9		0.49286	0.723345	0.298883	28.1644	28.4633	5	5	27.9636	28.8638	28.5501	27.287	28.1576	28.3603	28.4521	28.2177	28.5543	28.7322
1740	Q6ZQ88	Q6ZQ88	Lysine-specific histone demethylase 1A	Kdm1a	92.849	8.33848	11		0.0779789	0.968127	0.0506218	29.9412	29.9919	5	5	29.5947	29.8702	30.079	29.8461	30.316	30.0072	29.8073	29.5331	30.7417	29.8699
1741	Q6ZQI3	Q6ZQI3	Malectin	Mlec	32.342	8.87685	11		0.723474	0.495736	-0.54045	30.5009	29.9605	5	5	30.8403	31.0911	30.3546	29.7052	30.5135	30.397	29.7262	29.1697	29.675	30.8345
1743	Q6ZWN5	Q6ZWN5	40S ribosomal protein S9	Rps9	22.591	9.72079	21		0.0179327	0.992636	-0.0288017	32.448	32.4192	5	5	32.6159	33.5968	32.632	30.7843	32.6112	33.0531	31.9869	31.8378	31.9448	33.2738
1744	Q6ZWQ7	Q6ZWQ7		Spcs3	20.313	9.2865	5		0.391417	0.771942	-0.285989	30.7034	30.4174	5	5	30.725	31.1037	30.9007	30.1755	30.6121	31.0884	30.2472	29.4569	30.3899	30.9048
1745	Q6ZWR6	Q6ZWR6	Nesprin-1	Syne1	1009.9	7.09321	10		0.421703	0.766429	-0.273736	28.6531	28.5073	4	4	28.6883	28.0032	28.5716	28.8323	28.5203	28.4993	28.5076	28.511	28.5113	27.2178
1746	Q6ZWU9	Q6ZWU9	40S ribosomal protein S27	Rps27	9.461	9.78783	6		0.475272	0.570936	0.941911	31.6419	31.685	4	5	31.2133	31.4767	31.9017	27.1478	31.9759	31.5617	31.713	31.9339	31.2866	31.9298
1747	Q6ZWV3;P86048	Q6ZWV3;P86048	60S ribosomal protein L10;60S ribosomal protein L10-like	Rpl10;Rpl10l	24.604	10.2832	19		0.356877	0.762649	0.360033	33.7036	34.0636	5	5	33.7311	34.6347	33.8768	32.4398	33.8357	34.5222	33.4561	33.4496	34.1614	34.7289
1748	Q6ZWV7	Q6ZWV7	60S ribosomal protein L35	Rpl35	14.552	9.44119	6		0.110667	0.918696	-0.180418	29.768	29.5876	5	5	30.1266	31.1056	29.2378	28.1162	30.2539	29.3572	30.0274	28.637	29.302	30.6146
1749	Q6ZWX6	Q6ZWX6	Eukaryotic translation initiation factor 2 subunit 1	Eif2s1	36.108	9.22825	16		0.747043	0.650878	0.282457	32.0492	32.3317	5	5	31.7832	31.7046	32.2423	32.1677	32.3482	32.2271	32.3034	32.1636	32.8822	32.082
1750	Q6ZWY3	Q6ZWY3	40S ribosomal protein S27-like	Rps27l	9.4771	10.3341	8		0.995679	0.437266	0.505586	32.9434	33.4489	5	5	32.7251	32.8349	33.5859	32.3625	33.2085	33.5009	33.4356	33.9804	32.8801	33.4476
1751	Q6ZWZ2	Q6ZWZ2	Ubiquitin-conjugating enzyme E2 R2	Ube2r2	27.166	8.24878	3	+	4.03216	0.0028	1.81611	NaN	28.4833	0	5	26.4218	26.9387	26.7695	26.5439	26.6621	28.1065	29.2836	28.6431	28.4527	27.9306
1753	Q71LX4	Q71LX4	Talin-2	Tln2	253.62	7.9724	37		1.2297	0.477946	0.350505	30.2977	30.6482	5	5	30.5431	30.1982	30.2471	30.5135	29.9867	30.8912	30.4908	30.2691	30.6934	30.8967
1756	Q76MZ3	Q76MZ3	Serine/threonine-protein phosphatase 2A 65 kDa regulatory subunit A alpha isoform	Ppp2r1a	65.322	9.48619	28		0.148627	0.959473	0.0391182	33.5781	33.6172	5	5	33.4702	33.3762	33.6354	33.7273	33.6815	33.6525	33.7273	33.5417	33.8017	33.3631
1758	Q78IK4	Q78IK4	MICOS complex subunit Mic27	Apool	29.26	8.59083	7		0.21877	0.871256	0.242023	29.3411	29.5831	5	5	28.8984	30.3749	29.964	28.4711	28.9971	29.3506	29.6486	29.3639	28.9648	30.5876
1759	Q78IS1	Q78IS1	Transmembrane emp24 domain-containing protein 3	Tmed3	25.465	9.29015	6		0.83004	0.485494	-0.477503	31.4906	31.0131	5	5	31.5475	31.595	31.3315	31.2355	31.7433	31.3635	30.6891	30.0514	31.5792	31.3822
1761	Q78JW9	Q78JW9	Ubiquitin domain-containing protein UBFD1	Ubfd1	40.143	8.4638	6		1.44785	0.274047	0.621903	28.6069	29.2288	5	5	28.8181	29.1037	28.333	28.3189	28.4606	28.8829	29.0376	29.3227	29.941	28.9598
1762	Q78PG9	Q78PG9	Coiled-coil domain-containing protein 25	Ccdc25	24.48	8.26107	5	+	2.12426	0.0374815	-1.52054	28.4796	NaN	5	0	28.1579	28.2862	28.4926	28.863	28.5984	28.0203	27.3726	27.3719	25.7719	26.2587
1763	Q78PY7	Q78PY7	Staphylococcal nuclease domain-containing protein 1	Snd1	102.09	9.76884	64		0.0402667	0.987078	-0.0239113	35.1495	35.1256	5	5	35.1166	35.1509	35.4454	34.5254	35.5092	35.1851	34.8542	34.8791	35.4482	35.2613
1764	Q78XF5	Q78XF5	Oligosaccharyltransferase complex subunit OSTC	Ostc	16.815	8.20205	2		0.0129001	0.993402	0.0215706	26.6602	26.6672	5	3	26.9539	27.3657	25.5078	26.669	26.8044	27.2094	25.8789	25.8131	26.1976	28.3096
1765	Q78ZA7	Q78ZA7	Nucleosome assembly protein 1-like 4	Nap1l4	42.679	9.61704	15		0.337865	0.875436	0.130842	32.9089	33.0398	5	5	32.9733	32.9781	32.7744	33.1091	32.7098	32.7705	33.2328	33.276	33.335	32.5845
1766	Q791V5	Q791V5	Mitochondrial carrier homolog 2	Mtch2	33.499	8.41731	6		0.0404768	0.984318	-0.0406918	28.6253	28.5846	5	5	28.5324	29.0342	28.4538	28.4301	28.6761	29.5807	27.8475	27.823	28.8601	28.8119
1768	Q7M6Y3	Q7M6Y3	Phosphatidylinositol-binding clathrin assembly protein	Picalm	71.543	8.76339	12		0.0978623	0.95876	0.0629646	30.6867	30.7496	5	5	30.9858	31.0987	30.7388	29.8546	30.7555	30.9453	30.8492	30.5873	30.4676	30.8989
1770	Q7TMB8;Q5SQX6	Q7TMB8	Cytoplasmic FMR1-interacting protein 1	Cyfip1	145.24	7.62387	11		1.38228	0.143817	-1.28156	28.6349	28.3775	5	2	28.9066	29.1865	28.7239	28.295	28.0624	28.3626	27.4325	25.8509	26.7282	28.3923
1772	Q7TMK9	Q7TMK9	Heterogeneous nuclear ribonucleoprotein Q	Syncrip	69.632	9.28183	28		0.0954652	0.957509	-0.0628937	32.9436	32.8807	5	5	32.6788	32.9469	33.1208	32.6422	33.3292	32.6781	32.3338	32.9516	33.5867	32.8532
1773	Q7TMM9;CON__ENSEMBL:ENSBTAP00000025008;A2AQ07	Q7TMM9	Tubulin beta-2A chain	Tubb2a	49.906	8.41544	35		0.456585	0.586335	0.90957	29.4487	29.1052	3	5	26.6629	25.969	28.8296	30.2452	29.2712	28.5484	29.7321	30.4597	28.6549	28.1307
1774	Q7TMR0	Q7TMR0	Lysosomal Pro-X carboxypeptidase	Prcp	55.026	8.53729	7		1.12164	0.500406	0.34299	29.5294	29.8724	5	5	29.242	29.8373	29.3806	29.3335	29.8535	29.7686	29.6434	29.771	30.2542	29.9246
1775	Q7TMY4	Q7TMY4	THO complex subunit 7 homolog	Thoc7	23.715	8.14937	1		1.26717	0.166939	1.32794	NaN	28.5875	0	4	27.8303	27.7269	26.8166	25.6167	26.3305	28.7823	28.7498	28.6865	26.6107	28.1315
1776	Q7TMY8	Q7TMY8	E3 ubiquitin-protein ligase HUWE1	Huwe1	482.63	7.51195	5		0.275572	0.840894	0.23845	29.3832	29.6216	5	5	29.5741	30.1905	29.7429	28.7515	28.6569	29.5053	29.2987	29.1496	30.3435	29.811
1779	Q7TNC4	Q7TNC4	Putative RNA-binding protein Luc7-like 2	Luc7l2	46.582	9.35369	15		0.184934	0.909969	-0.107451	32.2874	32.18	5	5	32.5317	32.7019	32.4565	32.1583	31.5888	32.1553	32.4597	32.1409	31.762	32.382
1780	Q7TNP2	Q7TNP2	Serine/threonine-protein phosphatase 2A 65 kDa regulatory subunit A beta isoform	Ppp2r1b	65.934	7.02403	8		0.264217	0.812937	0.349854	25.2448	25.468	5	4	24.2855	24.8999	25.4549	25.8519	25.7316	26.4172	25.9077	25.7823	26.1012	23.7647
1782	Q7TNV0	Q7TNV0	Protein DEK	Dek	43.158	8.50329	10		0.172619	0.918835	0.0907661	29.643	29.7338	5	5	29.5347	29.7787	30.0393	29.0407	29.8215	29.665	29.7561	29.8191	29.3548	30.0738
1784	Q7TPR4	Q7TPR4	Alpha-actinin-1	Actn1	103.07	9.33971	66		0.535006	0.880935	-0.0992073	33.8165	33.7173	5	5	33.9188	33.8168	33.7441	33.8631	33.7398	33.5673	33.8059	33.488	33.9151	33.8105
1785	Q7TPV4	Q7TPV4	Myb-binding protein 1A	Mybbp1a	152.04	8.62435	32		0.148496	0.901	-0.200163	31.6499	31.4498	5	5	32.2622	32.4814	32.0468	30.1538	31.3054	32.0923	31.131	31.1912	30.6277	32.2066
1786	Q7TPW1	Q7TPW1	Nexilin	Nexn	72.107	8.42124	12		0.181689	0.880379	0.278128	29.5837	29.8618	5	5	30.6619	30.154	28.9116	29.6679	28.5232	30.9454	30.3334	30.3273	29.4003	28.3026
1787	Q7TQ48	Q7TQ48	Sarcalumenin	Srl	99.183	9.04442	21		0.69907	0.482974	0.619297	31.8645	32.4838	5	5	32.7799	32.5829	31.5433	31.3239	31.0924	33.3498	32.2938	31.602	32.5736	32.5997
1788	Q7TQH0	Q7TQH0	Ataxin-2-like protein	Atxn2l	110.65	8.51076	20		0.404639	0.799668	0.209085	30.4162	30.6252	5	5	30.3421	30.564	31.0658	29.9573	30.1516	30.2927	30.4873	30.5464	31.0735	30.7263
1789	Q7TQI3	Q7TQI3	Ubiquitin thioesterase OTUB1	Otub1	31.27	9.29159	9		0.115735	0.940349	-0.08554	31.9859	31.9004	5	5	31.6384	31.469	31.8895	32.7436	32.189	31.79	32.0391	32.1526	32.2057	31.3144
1791	Q7TS73	Q7TS73	Filamin-interacting protein FAM101A	Fam101a	22.605	8.72661	4		0.323653	0.813035	-0.247939	29.2789	29.031	5	5	29.1489	29.8849	29.8643	28.7341	28.7622	28.7842	28.7168	28.651	29.23	29.7729
1792	Q7TSG2	Q7TSG2	RNA polymerase II subunit A C-terminal domain phosphatase	Ctdp1	104.55	7.61763	5		0.352844	0.771586	-0.345814	28.0502	28.0435	5	4	28.3965	28.4682	27.6001	27.8875	27.8987	27.2774	28.4712	28.1364	28.289	26.3479
1793	Q7TSV4	Q7TSV4	Phosphoglucomutase-2	Pgm2	68.747	8.37455	11		0.0159244	0.993533	-0.00938263	29.8824	29.873	5	5	29.9863	29.5219	29.6082	30.0979	30.1979	29.8209	30.032	29.451	30.3422	29.7191
1795	Q7TT37	Q7TT37	Elongator complex protein 1	Ikbkap	149.58	8.40231	24		1.41796	0.474962	-0.328862	30.9398	30.611	5	5	30.8093	31.0847	31.1506	30.5998	31.0547	30.824	30.4495	30.3838	30.6643	30.7333
1796	Q7TT50;P54265	Q7TT50	Serine/threonine-protein kinase MRCK beta	Cdc42bpb	194.75	7.92901	18		0.0205723	0.993811	0.0125591	29.6593	29.6719	5	5	29.9171	29.7667	29.6997	29.3921	29.5209	30.1623	29.6692	29.073	29.4985	29.9564
1797	Q80SW1	Q80SW1	Putative adenosylhomocysteinase 2	Ahcyl1	58.951	8.76382	18		0.376449	0.854804	0.154071	30.8142	30.9682	5	5	30.763	30.5582	30.7926	30.7803	31.1768	31.1053	30.9329	30.3976	31.2262	31.1791
1800	Q80T21	Q80T21	ADAMTS-like protein 4	Adamtsl4	113.22	7.67186	9		0.119266	0.950822	0.0625183	28.4324	28.4949	5	5	28.7283	28.5578	27.8731	28.6283	28.3743	28.0505	28.6556	28.7678	28.6136	28.3869
1804	Q80TM9	Q80TM9	Nischarin	Nisch	175.01	7.73243	9		0.0594319	0.978679	-0.0374592	28.9004	28.8629	5	5	28.879	28.8029	28.8655	28.8833	29.0711	29.4127	29.0184	29.1729	28.491	28.2194
1806	Q80TV8	Q80TV8	CLIP-associating protein 1	Clasp1	169.23	6.9837	7		0.396572	0.71798	0.420621	NaN	27.642	0	4	27.8878	26.1478	27.1777	27.6988	25.9259	27.5386	27.7859	27.6388	26.3731	27.6046
1810	Q80U72	Q80U72	Protein scribble homolog	Scrib	174.06	6.80024	6		0.174407	0.897247	0.184676	NaN	26.7941	0	4	26.6846	27.1903	26.8212	26.5017	25.073	26.4227	27.2294	26.6648	26.8596	26.0176
1814	Q80UG5	Q80UG5	Septin-9	40057	65.574	9.29414	34		0.0348318	0.992987	-0.00764847	33.3376	33.33	5	5	33.2303	33.1822	33.396	33.4397	33.4399	33.1483	33.34	33.4394	33.4333	33.2888
1815	Q80UJ7	Q80UJ7	Rab3 GTPase-activating protein catalytic subunit	Rab3gap1	110.2	7.4407	4		1.4362	0.149469	-1.15466	27.7093	NaN	4	0	27.7946	27.9444	27.7381	27.3603	25.7811	26.3578	25.7617	26.5607	25.4833	26.6817
1817	Q80UM3;Q9DBB4	Q80UM3	N-alpha-acetyltransferase 15, NatA auxiliary subunit	Naa15	100.96	8.20036	14		0.383853	0.787602	0.258962	29.7878	30.0468	5	5	29.6246	29.8071	30.2857	29.0077	30.2141	30.6869	29.6783	29.6769	30.2509	29.941
1818	Q80UM7	Q80UM7	Mannosyl-oligosaccharide glucosidase	Mogs	91.83	8.82168	23		0.394421	0.770333	-0.290667	31.6515	31.3609	5	5	31.4634	32.0664	31.594	31.0519	32.0818	31.7413	30.8816	30.5644	31.7595	31.8574
1824	Q80UW8	Q80UW8	DNA-directed RNA polymerases I, II, and III subunit RPABC1	Polr2e	24.57	8.55269	6		0.93461	0.396791	0.667446	28.5084	29.1759	5	5	28.3722	28.8797	29.5793	27.9792	27.7316	29.5023	29.5471	29.2182	29.0941	28.5176
1827	Q80V26	Q80V26	Inositol monophosphatase 3	Impad1	38.616	9.24356	10		1.00869	0.54977	0.333763	31.8346	32.1683	5	5	31.5365	31.6092	32.2804	31.9327	31.8139	32.2618	32.0267	31.827	32.5445	32.1817
1828	Q80V42	Q80V42	Carboxypeptidase M	Cpm	50.555	7.94026	9		0.715706	0.473642	0.678268	27.9298	28.0022	3	5	27.6181	27.9092	28.262	26.2609	26.5693	28.9027	27.4429	27.6774	27.6044	28.3835
1831	Q80VI1	Q80VI1	E3 ubiquitin-protein ligase TRIM56	Trim56	79.512	8.95804	2		0.00451008	0.994271	0.00921974	31.996	32.0053	5	5	32.0432	32.0664	32.4426	31.9665	31.4615	33.0429	33.2288	32.5315	29.5396	31.6836
1835	Q80W93	Q80W93	Hydrocephalus-inducing protein	Hydin	581.52	6.97442	2	+	2.86008	0.0124545	-1.70702	28.649	NaN	4	0	27.7168	28.1357	29.3271	28.6328	28.5004	27.6084	26.7705	26.4563	26.2217	26.7209
1836	Q80WJ7	Q80WJ7	Protein LYRIC	Mtdh	63.845	8.17947	6		0.913277	0.322431	-1.03634	28.9891	28.8639	5	3	29.2416	29.1078	28.3741	29.4058	28.8161	29.1386	26.5407	26.6313	29.0294	28.4237
1839	Q80X19	Q80X19	Collagen alpha-1(XIV) chain	Col14a1	193.01	10.0967	112		0.412001	0.880711	-0.110486	36.8979	36.7874	5	5	36.8119	36.7202	36.7492	37.1326	37.0756	36.5031	37.0134	36.7238	36.8696	36.8273
1840	Q80X41	Q80X41	Serine/threonine-protein kinase VRK1	Vrk1	49.74	7.92282	4		1.54651	0.15263	0.982994	NaN	27.8527	0	5	27.5002	26.6175	27.3284	26.2346	26.6678	27.6877	28.7141	28.2505	27.1169	27.4941
1842	Q80X73	Q80X73	Protein pelota homolog	Pelo	43.349	8.41496	8		0.868886	0.580913	-0.330968	29.668	29.337	5	5	29.8855	29.6236	29.1839	30.0856	29.5613	29.1103	29.6828	29.6122	29.1453	29.1345
1843	Q80X82	Q80X82	Symplekin	Sympk	142.28	7.81323	10		0.138286	0.901282	-0.31344	28.9606	29.4326	4	3	28.7541	29.4253	29.4585	28.2045	27.0839	29.915	29.1019	25.9417	29.281	27.1196
1844	Q80X90	Q80X90	Filamin-B	Flnb	277.82	9.73099	172		0.580416	0.812723	-0.151757	36.579	36.4272	5	5	36.3228	36.5153	36.6588	36.5133	36.8849	36.2271	36.4855	36.3276	36.3735	36.7225
1845	Q80X95;Q6NTA4	Q80X95;Q6NTA4	Ras-related GTP-binding protein A;Ras-related GTP-binding protein B	Rraga;Rragb	36.566	8.21447	6		0.358928	0.785284	-0.279646	28.1644	28.1548	5	3	28.6349	28.901	27.9585	27.7985	27.5292	28.4837	28.1992	27.7814	27.161	27.7986
1849	Q80XN0	Q80XN0	D-beta-hydroxybutyrate dehydrogenase, mitochondrial	Bdh1	38.299	8.56013	8		1.23383	0.11557	2.49296	30.0374	30.1174	2	5	25.426	26.6482	28.9329	25.973	31.1419	29.413	30.8746	30.4954	30.8015	29.0024
1851	Q80XU3	Q80XU3	Nuclear ubiquitous casein and cyclin-dependent kinase substrate 1	Nucks1	26.313	8.10605	2		1.44165	0.122275	1.40672	NaN	28.0546	0	4	25.9362	25.7666	26.718	26.7074	25.9725	26.9587	28.6685	28.4937	28.0972	25.916
1856	Q80YS6	Q80YS6	Actin filament-associated protein 1	Afap1	80.614	7.49385	4		1.12831	0.38265	0.550826	26.5299	26.8509	4	3	26.1074	26.3787	27.1401	25.9684	26.6324	27.0687	27.0455	26.4384	27.5016	26.927
1858	Q80YV2	Q80YV2	Nuclear-interacting partner of ALK	Zc3hc1	55.196	8.14013	6		0.53671	0.572491	-0.653083	29.1685	29.0629	5	4	29.1847	29.1208	29.0348	29.4333	29.069	28.9252	29.2627	29.5352	28.5284	26.3256
1859	Q80YX1	Q80YX1	Tenascin	Tnc	231.8	9.9361	103		1.29833	0.707351	-0.176574	36.7137	36.5371	5	5	36.9214	36.5706	36.6073	36.8021	36.667	36.4838	36.5652	36.5258	36.4363	36.6744
1860	Q80Z71	Q80Z71	Tenascin-N	Tnn	173.09	9.54379	61		0.1194	0.94547	0.0749603	34.8485	34.9235	5	5	34.8802	34.383	34.5662	35.3831	35.03	34.6806	35.2288	35.3795	34.7357	34.5927
1862	Q80ZV0	Q80ZV0	Ribonuclease H2 subunit B	Rnaseh2b	34.729	8.08593	2		1.26925	0.284946	0.684565	27.2845	27.8368	4	5	26.623	27.401	28.1398	26.7023	26.895	28.2189	27.7788	27.5558	27.9187	27.7116
1863	Q810A7	Q810A7	ATP-dependent RNA helicase DDX42	Ddx42	101.96	8.24267	17		0.285431	0.880765	-0.140143	30.0031	29.8629	5	5	29.7081	29.5528	30.2524	29.938	30.5641	29.5811	29.7718	29.8252	30.1575	29.9791
1864	Q810B6	Q810B6	Rabankyrin-5	Ankfy1	128.65	8.1599	12		1.0632	0.425048	-0.507326	30.0452	29.5379	5	5	30.3125	30.3655	30.0325	29.7753	29.7403	29.5071	29.4469	29.4225	28.9645	30.3484
1865	Q810D6	Q810D6	Glutamate-rich WD repeat-containing protein 1	Grwd1	49.223	8.67146	9		0.023844	0.98984	-0.0283417	30.2944	30.266	5	5	30.4107	30.1541	29.8692	30.7512	30.2867	30.2505	30.9492	31.0987	30.0871	28.9447
1866	Q811B1	Q811B1	Xylosyltransferase 1	Xylt1	107.3	8.07328	15		0.242615	0.873773	-0.186818	29.3577	29.1709	5	5	28.952	29.6344	29.8125	28.6925	29.6972	29.2132	29.0084	28.9738	28.6633	29.9956
1867	Q811D0;Q91XM9;Q62108;P70175	Q811D0	Disks large homolog 1	Dlg1	100.12	8.09409	6		0.35649	0.748983	-0.40816	29.2215	29.293	5	4	29.3841	29.4318	29.1948	28.8248	29.2722	29.2723	29.2041	29.6651	29.0306	26.8948
1868	Q811F1	Q811F1	Zinc finger and BTB domain-containing protein 41	Zbtb41	104.68	7.96636	2		0.775882	0.397099	0.954474	28.5772	29.0989	4	5	29.4779	28.7818	26.4131	28.5133	27.5359	30.1025	28.3155	28.4199	29.1988	29.4576
1870	Q8BFP9	Q8BFP9	[Pyruvate dehydrogenase (acetyl-transferring)] kinase isozyme 1, mitochondrial	Pdk1	48.994	7.82298	8		0.454327	0.690601	0.399202	27.9301	27.839	3	5	26.5836	26.8248	28.0564	28.6582	27.0757	27.734	28.1333	27.6991	27.93	27.6984
1871	Q8BFQ4	Q8BFQ4	WD repeat-containing protein 82	Wdr82	35.079	8.75806	13		0.601563	0.741406	0.229661	30.0768	30.3064	5	5	29.6581	29.9044	30.0488	30.1041	30.6685	30.2993	30.0692	30.4243	30.2089	30.5306
1872	Q8BFQ8	Q8BFQ8	Parkinson disease 7 domain-containing protein 1	Pddc1	23.277	7.87344	3		0.06462	0.969426	-0.058585	26.4639	26.4123	3	4	26.4609	25.9833	25.9913	27.0255	26.3748	25.7453	26.1412	27.2113	25.8935	26.5515
1875	Q8BFR5	Q8BFR5	Elongation factor Tu, mitochondrial	Tufm	49.508	9.72567	29		0.849025	0.653089	0.259669	34.1554	34.4151	5	5	34.1486	34.1587	34.0237	34.5455	33.9004	33.9653	34.4784	34.6404	34.5303	34.4608
1877	Q8BFW7	Q8BFW7	Lipoma-preferred partner homolog	Lpp	65.89	9.17797	22		0.0104139	0.997035	0.00695076	32.1935	32.2005	5	5	32.5885	32.4802	31.7179	32.3217	31.8594	31.8011	32.2672	32.6408	31.9555	32.3379
1879	Q8BFY9	Q8BFY9	Transportin-1	Tnpo1	102.36	8.26461	18		0.549226	0.551888	-0.727519	29.7798	29.0523	5	5	30.0377	30.4144	29.9279	28.9203	29.5986	30.8233	28.938	28.1969	27.5329	29.7703
1881	Q8BFZ9	Q8BFZ9	Erlin-2	Erlin2	37.872	8.9703	16		0.674225	0.588186	-0.389584	31.4879	31.0983	5	5	31.2958	31.3096	30.9643	32.1602	31.7094	30.6816	31.3697	30.6643	31.7044	31.0714
1882	Q8BG05	Q8BG05	Heterogeneous nuclear ribonucleoprotein A3	Hnrnpa3	39.652	10.3006	29		0.363119	0.879615	-0.121401	35.5091	35.3877	5	5	35.5439	35.3496	35.808	35.5067	35.3374	34.9899	35.293	35.705	35.4275	35.5232
1884	Q8BG32	Q8BG32	26S proteasome non-ATPase regulatory subunit 11	Psmd11	47.436	8.92153	19		0.997974	0.373834	0.670256	31.0637	31.7339	5	5	31.1345	31.3119	31.7006	30.2744	30.8969	31.802	31.8476	31.3831	32.6336	31.0033
1889	Q8BGB7	Q8BGB7	Enolase-phosphatase E1	Enoph1	28.6	8.48296	7		0.330955	0.834924	-0.205912	28.8631	28.6572	5	5	28.6988	28.4157	28.8337	29.4542	28.9129	28.6802	29.3046	28.4045	28.0601	28.8365
1890	Q8BGC0	Q8BGC0	HIV Tat-specific factor 1 homolog	Htatsf1	86.239	8.75404	17		0.0634743	0.981381	-0.0318447	31.7564	31.7245	5	5	31.525	31.32	31.6345	32.2516	32.0508	31.5918	31.7429	31.7903	31.8798	31.6178
1894	Q8BGH2	Q8BGH2	Sorting and assembly machinery component 50 homolog	Samm50	51.863	8.11621	6		0.473382	0.651383	0.484707	28.6715	29.1562	5	5	29.6561	29.3354	27.9437	28.1449	28.2775	28.412	28.8485	29.0516	29.1067	30.3624
1895	Q8BGQ7	Q8BGQ7	Alanine--tRNA ligase, cytoplasmic	Aars	106.91	8.95599	40		1.01941	0.509719	-0.36029	32.6327	32.2724	5	5	32.6666	32.4857	32.692	32.5355	32.7836	31.97	32.4378	32.1501	31.901	32.9031
1898	Q8BGW1	Q8BGW1	Alpha-ketoglutarate-dependent dioxygenase FTO	Fto	58.006	9.02127	21		0.0609269	0.983958	-0.0258976	31.9238	31.8979	5	5	31.7808	32.0322	31.8769	32.3096	31.6195	31.7368	32.0563	32.1713	31.6508	31.8744
1899	Q8BGZ4	Q8BGZ4	Cell division cycle protein 23 homolog	Cdc23	68.561	8.25501	12		0.544674	0.552703	-0.723053	29.3673	28.6443	5	5	30.2336	30.3782	29.4607	27.8807	28.8833	29.9833	27.7432	27.9977	29.3425	28.1547
1900	Q8BH04;Q9Z2V4	Q8BH04	Phosphoenolpyruvate carboxykinase [GTP], mitochondrial	Pck2	70.527	9.11183	37		1.2201	0.580412	0.266983	32.3206	32.5876	5	5	31.9736	32.1127	32.5671	32.4699	32.4797	32.5413	32.512	32.6522	32.5371	32.6953
1902	Q8BH24	Q8BH24	Transmembrane 9 superfamily member 4	Tm9sf4	74.692	7.83642	7		1.23281	0.180549	-1.29773	28.3941	NaN	4	0	28.4747	29.2498	27.8487	26.1981	28.0032	27.5577	26.3173	25.7372	26.9801	26.6935
1903	Q8BH43;Q8R5H6	Q8BH43	Wiskott-Aldrich syndrome protein family member 2	Wasf2	54.073	8.71418	8		1.15835	0.235356	0.991509	29.6192	30.6107	5	5	30.291	27.997	30.2728	29.8641	29.6714	30.2407	30.9541	31.2008	30.5975	30.0606
1906	Q8BH58	Q8BH58	TIP41-like protein	Tiprl	31.253	8.76483	7		0.171718	0.903894	-0.130625	30.2256	30.095	5	5	29.6833	30.002	29.8422	30.7567	30.8441	29.6218	30.553	30.3249	29.744	30.2315
1907	Q8BH59	Q8BH59	Calcium-binding mitochondrial carrier protein Aralar1	Slc25a12	74.569	8.3407	11		0.594122	0.582416	-0.506393	29.9492	29.4428	5	5	29.8098	30.3338	30.1262	29.7549	29.7212	30.6525	28.9056	29.4123	28.361	29.8826
1908	Q8BH60	Q8BH60	Golgi-associated PDZ and coiled-coil motif-containing protein	Gopc	50.662	8.04289	6		0.354248	0.755112	-0.387948	28.4926	28.377	5	4	28.8326	29.4738	27.9172	28.8474	27.3919	28.0051	28.3024	28.3418	28.8588	27.0151
1909	Q8BH61	Q8BH61	Coagulation factor XIII A chain	F13a1	83.206	8.42405	15		0.4037	0.770441	0.272582	29.9912	30.2638	5	5	30.3935	30.6951	29.1741	29.6718	30.0214	30.3752	30.4235	29.6928	30.4295	30.3978
1910	Q8BH64	Q8BH64	EH domain-containing protein 2	Ehd2	61.174	9.00204	23		0.0480809	0.986562	0.0278717	31.7546	31.7825	5	5	32.1672	32.0514	31.5464	31.1452	31.863	32.0846	31.7563	31.8498	31.6042	31.6176
1911	Q8BH69	Q8BH69	Selenide, water dikinase 1	Sephs1	42.906	8.29618	12		0.407558	0.691855	0.486564	28.0567	28.5433	5	5	27.5963	27.6425	28.5807	28.2071	28.2568	27.4225	29.2231	29.9375	28.7473	27.3858
1914	Q8BH95	Q8BH95	Enoyl-CoA hydratase, mitochondrial	Echs1	31.474	9.11203	8		0.375929	0.741604	0.386799	31.1741	31.5609	5	5	30.1774	30.7792	31.0859	32.2291	31.5989	31.402	31.8028	32.0094	32.0947	30.4955
1915	Q8BH97	Q8BH97	Reticulocalbin-3	Rcn3	38.001	9.34256	13		0.548373	0.652328	0.38793	31.6681	32.0561	5	5	32.024	32.0581	32.1831	30.9635	31.112	32.8054	32.0583	32.1064	31.7887	31.5214
1916	Q8BHA3	Q8BHA3	Probable D-tyrosyl-tRNA(Tyr) deacylase 2	Dtd2	18.236	7.95605	3		0.754524	0.439182	0.758421	NaN	27.9458	0	4	26.8074	26.5559	28.1005	26.0527	26.5625	27.9974	27.8977	28.1561	26.088	27.732
1918	Q8BHC4	Q8BHC4	Dephospho-CoA kinase domain-containing protein	Dcakd	26.476	8.68154	5		0.336098	0.714018	-0.678069	29.0865	28.4084	5	5	30.7161	30.5752	29.0244	27.7412	27.3756	29.7282	27.4909	27.3493	27.7836	29.6901
1919	Q8BHC9	Q8BHC9	Alpha-(1,3)-fucosyltransferase 11	Fut11	55.532	8.12652	4		0.00127111	0.99981	-0.00160675	28.6916	28.69	5	5	29.1752	29.7754	28.3372	28.2276	27.9427	28.4736	28.3925	28.7398	29.6501	28.1941
1920	Q8BHD7	Q8BHD7	Polypyrimidine tract-binding protein 3	Ptbp3	56.7	8.46814	11		0.779727	0.3777	1.05922	29.2033	29.6059	4	5	28.8973	29.6578	28.9887	25.9205	29.2693	29.0251	29.7075	29.8326	30.0935	29.371
1921	Q8BHJ5	Q8BHJ5	F-box-like/WD repeat-containing protein TBL1XR1	Tbl1xr1	55.66	8.03076	8		0.899952	0.357751	0.871434	28.291	28.469	3	5	25.8617	28.2953	27.2533	28.4986	28.0791	28.1867	28.7352	28.7678	27.9666	28.6887
1923	Q8BHN3	Q8BHN3	Neutral alpha-glucosidase AB	Ganab	106.91	9.06547	33		0.778825	0.749834	-0.187543	32.7675	32.5799	5	5	32.3975	32.5653	32.8792	32.9847	33.0107	32.5762	32.5103	32.6029	32.6175	32.5928
1924	Q8BHS3	Q8BHS3	Pre-mRNA-splicing factor RBM22	Rbm22	46.895	7.59335	5		1.47937	0.143632	1.12127	NaN	28.2148	0	4	26.9661	27.1279	26.4122	27.1144	26.2778	27.5549	28.0937	28.1428	29.0681	26.6454
1925	Q8BHT6	Q8BHT6	Beta-1,3-glucosyltransferase	B3galtl	55.357	8.37774	9		0.484622	0.687567	0.380144	29.3347	29.7148	5	5	28.7126	28.4997	29.7234	29.8745	29.8633	29.4888	29.3134	29.5164	30.4885	29.7671
1928	Q8BI84	Q8BI84	Melanoma inhibitory activity protein 3	Mia3	213.67	8.12953	25		0.880355	0.576924	-0.331406	30.8258	30.4944	5	5	31.0785	30.7971	30.9041	30.7978	30.5512	30.7716	30.2388	29.9215	30.6985	30.8414
1929	Q8BIA4	Q8BIA4	F-box/WD repeat-containing protein 8	Fbxw8	67.955	8.60632	19		1.05326	0.483262	-0.382682	30.6478	30.2651	5	5	30.8219	30.8614	30.6041	30.6659	30.2856	30.3335	30.018	29.7514	30.6214	30.6012
1930	Q8BIJ6	Q8BIJ6	Isoleucine--tRNA ligase, mitochondrial	Iars2	112.8	7.6771	8		0.00757373	0.996655	-0.00878868	28.1363	27.8324	4	5	28.2218	28.0583	27.8608	28.4041	26.6608	28.108	27.2917	27.212	28.4221	28.1281
1931	Q8BIQ5;Q8C7E9	Q8BIQ5;Q8C7E9	Cleavage stimulation factor subunit 2;Cleavage stimulation factor subunit 2 tau variant	Cstf2;Cstf2t	61.341	7.78871	3	+	2.33551	0.0193333	1.98085	NaN	28.3097	0	5	28.0255	26.1695	26.3703	25.3337	25.7452	27.8281	28.1352	28.283	29.129	28.1732
1933	Q8BJ05	Q8BJ05	Zinc finger CCCH domain-containing protein 14	Zc3h14	82.408	7.77659	8		1.49201	0.14407	1.11289	28.1514	28.7685	3	5	27.3419	26.4818	28.7835	27.5494	28.1212	29.1097	28.7927	29.007	28.8938	28.0391
1936	Q8BJ71	Q8BJ71	Nuclear pore complex protein Nup93	Nup93	93.28	8.069	11		0.185405	0.863959	-0.438885	29.186	29.5024	5	4	29.8076	30.1064	29.7041	28.1211	28.1906	30.8463	28.8831	28.8874	25.7258	29.3928
1937	Q8BJD1	Q8BJD1	Inter-alpha-trypsin inhibitor heavy chain H5	Itih5	106.75	8.05652	8		0.634147	0.472097	-0.938074	29.8049	29.5489	5	4	30.3056	30.3736	29.1939	29.3573	29.7941	29.646	29.6483	29.3054	29.5957	26.1387
1938	Q8BJS4	Q8BJS4	SUN domain-containing protein 2	Sun2	81.604	7.41526	5		0.958923	0.434985	-0.551853	27.3928	NaN	4	0	27.2157	27.9856	27.3014	26.4217	27.0686	26.5018	26.1458	27.1641	26.9183	26.5037
1941	Q8BJW6	Q8BJW6	Eukaryotic translation initiation factor 2A;Eukaryotic translation initiation factor 2A, N-terminally processed	Eif2a	64.403	8.86558	25		0.479323	0.838583	-0.146421	31.5525	31.406	5	5	31.6264	31.3563	31.4962	31.4739	31.8095	31.344	31.1625	31.3485	31.8613	31.314
1942	Q8BJY1	Q8BJY1	26S proteasome non-ATPase regulatory subunit 5	Psmd5	55.971	8.58584	15		0.662368	0.561592	-0.484145	30.383	29.8989	5	5	30.4002	30.5685	30.2501	30.1612	30.5352	30.2448	29.8796	28.5742	30.1534	30.6425
1943	Q8BK62	Q8BK62	Olfactomedin-like protein 3	Olfml3	45.745	8.66511	7		0.556113	0.574544	-0.596254	30.1972	29.6009	5	5	29.7172	29.8216	29.9358	30.6907	30.8205	30.1342	28.9416	28.1263	30.4129	30.3896
1945	Q8BK64	Q8BK64	Activator of 90 kDa heat shock protein ATPase homolog 1	Ahsa1	38.117	8.92792	13		0.118439	0.950739	-0.0624168	31.1437	31.0813	5	5	31.0941	31.103	30.8082	31.5605	31.153	30.6078	30.9505	31.5559	31.2537	31.0387
1946	Q8BK67	Q8BK67	Protein RCC2	Rcc2	55.983	9.00325	21		0.41895	0.783772	-0.24025	31.8716	31.6314	5	5	31.7219	31.6169	31.686	32.0226	32.3108	30.9227	31.4774	31.7266	32.3124	31.718
1947	Q8BKC5;Q8BIV3	Q8BKC5	Importin-5	Ipo5	123.59	8.46007	28		0.994034	0.430468	-0.520987	31.0089	30.4879	5	5	31.2022	31.3747	31.0302	30.5895	30.848	31.0543	30.2738	29.8288	30.215	31.0678
1949	Q8BKG3	Q8BKG3	Inactive tyrosine-protein kinase 7	Ptk7	117.53	8.40731	18		0.882163	0.688192	-0.224124	30.8904	30.6663	5	5	30.7357	30.6103	30.8392	31.1461	31.121	30.6475	30.5797	30.6864	30.4642	30.9538
1951	Q8BKT7	Q8BKT7	THO complex subunit 5 homolog	Thoc5	78.685	7.6582	6		0.671885	0.656369	0.301039	27.5044	27.8054	5	5	27.6896	27.8911	27.5852	26.8599	27.4959	28.0366	27.8507	27.2679	27.9863	27.8855
1952	Q8BKZ9	Q8BKZ9	Pyruvate dehydrogenase protein X component, mitochondrial	Pdhx	53.998	7.9208	5		0.714605	0.476193	0.639742	28.025	28.3102	4	5	28.1673	27.9012	27.9067	28.125	26.2524	28.251	27.7798	27.7439	29.2068	28.5698
1953	Q8BL66;Q8CHD8	Q8BL66	Early endosome antigen 1	Eea1	160.91	7.88825	20		0.348196	0.723844	0.540269	29.9402	29.8511	4	5	30.0052	29.5512	30.4573	29.7473	26.7932	29.8212	30.4389	29.9757	29.8384	29.1813
1955	Q8BL97	Q8BL97	Serine/arginine-rich splicing factor 7	Srsf7	30.817	9.37743	12		0.0258138	0.989062	-0.0372681	31.7218	31.6845	5	5	31.6817	31.8525	32.4701	32.4095	30.1951	31.8906	32.024	32.4162	30.8361	31.2557
1956	Q8BLX7	Q8BLX7	Collagen alpha-1(XVI) chain	Col16a1	155.8	8.49817	15		0.743511	0.49548	-0.525317	31.4778	30.9524	5	5	31.8649	31.8857	31.4763	30.8023	31.3596	31.2044	30.3284	30.1586	31.4498	31.621
1958	Q8BM72	Q8BM72	Heat shock 70 kDa protein 13	Hspa13	51.709	8.02873	7		0.227922	0.865858	0.258736	28.1332	28.2274	4	5	27.3104	26.9932	28.0539	28.5759	28.9099	27.6204	27.9161	27.9951	28.3222	29.2831
1959	Q8BMA6	Q8BMA6	Signal recognition particle subunit SRP68	Srp68	70.573	8.59649	20		0.633076	0.622359	0.372143	30.5155	30.8877	5	5	30.1633	30.6345	31.2307	29.7317	30.8176	31.1096	30.7371	30.6159	31.2532	30.7227
1960	Q8BMD8	Q8BMD8	Calcium-binding mitochondrial carrier protein SCaMC-1	Slc25a24	52.901	8.59402	16		0.0755552	0.958749	0.079752	30.1006	30.1803	5	5	30.8085	30.1867	29.8218	29.5728	30.1132	30.5453	30.4777	28.9504	30.7606	30.1678
1961	Q8BMF4	Q8BMF4	Dihydrolipoyllysine-residue acetyltransferase component of pyruvate dehydrogenase complex, mitochondrial	Dlat	67.941	8.35858	16		0.215766	0.907548	0.100106	29.9084	30.0085	5	5	30.0278	29.7007	29.348	30.2152	30.2502	29.8147	29.9647	30.2947	29.9966	29.9717
1963	Q8BMJ2	Q8BMJ2	Leucine--tRNA ligase, cytoplasmic	Lars	134.19	8.48758	30		0.0629258	0.981673	-0.0274757	31.174	31.1465	5	5	31.171	31.1647	31.4061	30.8477	31.2805	31.3986	31.3043	30.948	30.7504	31.3315
1965	Q8BMK4	Q8BMK4	Cytoskeleton-associated protein 4	Ckap4	63.691	10.043	58		0.491325	0.766611	0.234151	35.3279	35.562	5	5	35.1894	35.4051	35.9391	35.0127	35.0931	35.8837	35.6122	35.0054	35.6373	35.6715
1966	Q8BML9	Q8BML9		Qars	87.676	8.80018	29		0.675778	0.691948	-0.260304	31.8769	31.6166	5	5	32.1771	32.0885	31.9164	31.6453	31.557	31.2749	31.6279	31.4609	31.5585	32.1606
1967	Q8BMP6	Q8BMP6	Golgi resident protein GCP60	Acbd3	60.18	9.2137	19		1.36644	0.463507	-0.361707	32.1653	31.8036	5	5	32.0873	32.3319	31.7327	32.4591	32.2155	31.5266	31.7136	31.9032	31.8565	32.0181
1969	Q8BMS1	Q8BMS1	Trifunctional enzyme subunit alpha, mitochondrial;Long-chain enoyl-CoA hydratase;Long chain 3-hydroxyacyl-CoA dehydrogenase	Hadha	82.669	9.19022	36		0.0218612	0.992949	0.00904541	32.8456	32.8547	5	5	32.8906	32.8489	32.8904	32.3978	33.2004	32.7068	32.8254	33.0799	32.8458	32.8154
1976	Q8BNV1	Q8BNV1	tRNA (uracil-5-)-methyltransferase homolog A	Trmt2a	63.301	7.77669	7		0.733347	0.474299	-0.66428	27.7073	NaN	4	0	27.6357	26.249	27.418	27.6167	28.1587	26.4922	26.6261	25.8163	27.8359	26.9862
1979	Q8BP47	Q8BP47	Asparagine--tRNA ligase, cytoplasmic	Nars	64.279	9.13485	22		0.00847655	0.99589	0.00715752	31.7688	31.7759	5	5	32.0113	32.2635	32.1698	31.0889	31.3105	32.0394	31.491	31.3134	32.1219	31.914
1980	Q8BP48	Q8BP48	Methionine aminopeptidase 1	Metap1	43.221	9.03181	14		1.16867	0.476084	0.37345	31.5375	31.911	5	5	31.8173	31.7292	31.3636	31.7078	31.0696	31.6236	31.8211	32.2881	31.9017	31.9204
1981	Q8BP67	Q8BP67	60S ribosomal protein L24	Rpl24	17.779	9.85461	19		0.104318	0.926506	0.151869	32.3784	32.5302	5	5	33.1524	33.5747	31.5691	31.4077	32.188	33.2807	32.108	31.8609	32.0058	33.3957
1982	Q8BP71;Q9JJ43;Q8BIF2	Q8BP71;Q9JJ43	RNA binding protein fox-1 homolog 2;RNA binding protein fox-1 homolog 1	Rbfox2;Rbfox1	47.33	8.73741	8		0.0271056	0.990393	0.0257988	29.7088	29.7346	5	5	30.2966	30.3616	29.6405	29.2523	28.9931	29.5376	29.4182	29.5303	29.7509	30.4361
1983	Q8BP92	Q8BP92	Reticulocalbin-2	Rcn2	37.27	9.97997	18		0.816994	0.43238	0.711228	33.5906	34.3019	5	5	33.6604	33.5915	34.286	33.7874	32.6278	34.2416	34.9162	35.1696	34.0629	33.1189
1985	Q8BPB5	Q8BPB5	EGF-containing fibulin-like extracellular matrix protein 1	Efemp1	54.952	8.2316	6		0.141902	0.903522	-0.211853	28.6344	28.9078	5	4	29.6091	28.5884	28.6402	28.1471	28.1871	28.74	28.4381	26.4813	29.1285	29.3245
1986	Q8BPG6	Q8BPG6	Sulfatase-modifying factor 2	Sumf2	34.737	8.6151	9		0.344793	0.774255	0.332936	29.4057	29.7386	5	5	29.0776	28.6386	29.6164	29.994	29.7017	28.8703	30.0633	30.554	30.2402	28.9651
1987	Q8BPK2	Q8BPK2		Zcchc3	43.77	7.79687	3	+	2.28025	0.0194483	1.97781	NaN	28.5776	0	4	27.2007	26.7158	26.6178	24.6281	27.0689	29.0841	28.0829	28.7758	28.3678	27.8098
1988	Q8BPM2	Q8BPM2	Mitogen-activated protein kinase kinase kinase kinase 5	Map4k5	95.044	7.71292	4		0.0243371	0.989744	0.0221786	28.1323	27.9083	4	5	27.933	28.2231	26.9016	27.743	28.6301	27.8177	27.8643	27.6335	28.386	27.8401
1992	Q8BR90	Q8BR90	UPF0600 protein C5orf51 homolog		33.471	8.41905	6		0.770312	0.495745	-0.503035	29.163	28.66	5	5	29.6617	29.3268	28.9218	29.3613	28.5436	28.5053	28.0145	28.474	28.6512	29.655
1993	Q8BRF7	Q8BRF7	Sec1 family domain-containing protein 1	Scfd1	72.322	8.2546	14		0.231979	0.89355	-0.14007	29.6364	29.4963	5	5	29.2155	29.3655	29.5779	30.2519	29.7712	29.4885	28.963	29.8012	29.9004	29.3286
1995	Q8BRN9	Q8BRN9	Coiled-coil and C2 domain-containing protein 1B	Cc2d1b	93.09	7.39259	4		0.267281	0.813556	0.34767	26.5501	NaN	4	0	27.8377	27.3154	25.5583	26.3416	26.4628	27.6715	26.3899	26.6676	28.1824	26.3427
2000	Q8BSQ9	Q8BSQ9	Protein polybromo-1	Pbrm1	187.19	7.46839	8		0.0980468	0.935744	-0.128228	27.997	27.8688	5	5	28.2571	28.8008	28.0845	27.6534	27.1892	27.9457	27.3382	27.0416	27.6701	29.3484
2001	Q8BSY0	Q8BSY0	Aspartyl/asparaginyl beta-hydroxylase	Asph	83.041	9.12405	28		0.247242	0.895977	0.128947	32.078	32.207	5	5	31.5852	31.8355	32.3846	31.9402	32.6447	32.0609	31.9435	32.2575	32.5172	32.2557
2002	Q8BT60	Q8BT60	Copine-3	Cpne3	59.584	8.11988	5		0.15484	0.92301	0.0900429	28.539	28.6291	5	5	28.3283	28.2628	28.3259	28.6382	29.14	28.6121	29.1356	28.7675	28.258	28.3722
2003	Q8BTI8	Q8BTI8	Serine/arginine repetitive matrix protein 2	Srrm2	294.84	8.32911	25		0.780034	0.586729	-0.352289	31.7852	31.4329	5	5	31.7883	31.584	31.7715	32.3422	31.44	31.4889	31.7534	31.4669	30.7766	31.6787
2004	Q8BTM8	Q8BTM8	Filamin-A	Flna	281.22	9.50998	141		0.100369	0.970009	0.03209	35.6824	35.7145	5	5	35.792	35.8156	35.69	35.3561	35.7586	35.6957	35.513	35.5664	35.8329	35.9647
2005	Q8BTS4	Q8BTS4	Nuclear pore complex protein Nup54	Nup54	55.731	8.32664	11		0.679973	0.477878	0.707507	29.4067	29.6029	4	5	29.2477	29.4623	29.349	29.5676	26.8504	29.4731	29.4708	29.6134	29.6584	29.7989
2006	Q8BTV2	Q8BTV2	Cleavage and polyadenylation specificity factor subunit 7	Cpsf7	52.01	8.03854	6		1.10414	0.267343	-0.944373	28.616	27.5067	4	5	27.8994	27.7915	29.0163	28.6072	28.941	28.7305	27.1752	26.7954	26.7305	28.1019
2009	Q8BTZ7	Q8BTZ7	Mannose-1-phosphate guanyltransferase beta	Gmppb	39.916	8.65893	14		0.42133	0.761089	-0.284814	29.935	29.6501	5	5	29.6506	29.6533	30.4397	29.6824	30.2489	29.0216	29.8395	29.3863	30.5243	29.4791
2011	Q8BU14	Q8BU14	Translocation protein SEC62	Sec62	45.58	8.63038	5		0.061352	0.963414	0.0911388	29.4442	29.5354	5	5	29.2627	29.8235	30.4158	28.1877	29.5314	30.5463	29.0087	28.4773	29.3911	30.2535
2012	Q8BU25	Q8BU25	Inactive serine protease PAMR1	Pamr1	80.319	7.79823	4	+	3.54033	0.00714286	-1.5369	28.5537	NaN	5	0	28.5468	28.4592	29.0724	28.3697	28.3202	26.9633	27.2217	27.7003	26.4563	26.7423
2013	Q8BU30	Q8BU30	Isoleucine--tRNA ligase, cytoplasmic	Iars	144.27	8.87438	38		0.620874	0.675925	-0.29659	32.5144	32.2178	5	5	32.6115	32.863	32.8681	31.9408	32.2886	32.6622	32.2532	32.145	31.7263	32.3025
2014	Q8BU31	Q8BU31	Ras-related protein Rap-2c	Rap2c	20.745	8.53894	8		0.149923	0.905107	-0.177477	28.8939	28.7164	5	5	29.6366	29.3736	28.3338	28.513	28.6122	28.5716	29.174	28.6064	27.4748	29.7551
2015	Q8BU85	Q8BU85	Methionine-R-sulfoxide reductase B3, mitochondrial	Msrb3	26.832	8.3796	3		0.214573	0.846504	-0.393025	28.8984	28.9799	4	4	28.8316	28.0083	28.2915	28.8262	29.6442	28.3578	28.6952	29.3593	29.5073	25.717
2017	Q8BUK6	Q8BUK6	Protein Hook homolog 3	Hook3	83.217	8.03858	10	+	3.92452	0.00184615	2.57203	NaN	29.5577	0	5	27.1651	26.7206	26.9597	27.5778	26.5052	29.0392	30.2489	30.4069	29.2321	28.8616
2018	Q8BUV3	Q8BUV3	Gephyrin;Molybdopterin adenylyltransferase;Molybdopterin molybdenumtransferase	Gphn	83.281	7.67197	10	+	3.2828	0.00788571	-1.58265	28.2004	NaN	5	0	28.3022	28.0678	28.6616	27.978	27.9925	26.1679	27.4807	26.6868	26.0553	26.6982
2020	Q8BV57	Q8BV57	Soluble scavenger receptor cysteine-rich domain-containing protein SSC5D	Ssc5d	144.63	7.69752	9		1.25607	0.189642	1.16796	28.2625	28.3509	2	5	28.2521	28.2728	26.9971	26.4935	25.8993	27.8573	28.6582	28.6755	27.7831	28.7806
2023	Q8BVF2	Q8BVF2	Phosducin-like protein 3	Pdcl3	27.581	7.97148	3		1.04979	0.432627	0.501905	27.3333	27.8299	4	5	27.3469	27.3063	27.8067	27.4121	26.7677	27.4462	27.8241	28.464	28.0367	27.3782
2025	Q8BVI4	Q8BVI4	Dihydropteridine reductase	Qdpr	25.57	8.59252	5		0.556747	0.550548	0.718881	29.0374	29.7563	5	5	27.6603	28.4049	28.8151	29.9618	30.3451	29.0182	29.9382	29.7337	31.0347	29.0568
2027	Q8BVQ5	Q8BVQ5	Protein phosphatase methylesterase 1	Ppme1	42.256	8.5121	8		1.45029	0.442885	0.362555	29.2067	29.5693	5	5	29.256	29.283	29.4684	29.1323	28.894	29.3992	29.4528	29.6864	29.3699	29.938
2030	Q8BVY0	Q8BVY0	Ribosomal L1 domain-containing protein 1	Rsl1d1	50.421	8.47163	11		0.466762	0.676732	-0.420838	29.3084	28.8876	5	5	29.4988	29.9856	28.6598	28.5013	29.8965	28.4775	28.4994	28.7882	28.6971	29.9757
2034	Q8BWT1	Q8BWT1	3-ketoacyl-CoA thiolase, mitochondrial	Acaa2	41.829	8.94	12		2.76268	0.138048	0.582349	30.8954	31.4778	5	5	31.114	31.21	30.6799	30.7694	30.7037	31.4427	31.4633	31.6197	31.5851	31.278
2036	Q8BWW4	Q8BWW4	La-related protein 4	Larp4	79.763	7.94985	4		0.45489	0.620537	-0.668646	28.4416	28.6085	4	2	28.276	28.1882	29.1622	26.5394	28.1398	26.9884	26.67	28.3201	28.8969	26.087
2037	Q8BWY3	Q8BWY3	Eukaryotic peptide chain release factor subunit 1	Etf1	49.03	8.93578	14		0.396303	0.824222	-0.18621	31.4664	31.2802	5	5	31.4527	31.5312	31.3817	31.0309	31.9358	30.7961	31.1955	31.2226	31.4911	31.6959
2038	Q8BX02	Q8BX02	KN motif and ankyrin repeat domain-containing protein 2	Kank2	90.244	8.58531	20		0.38159	0.806117	0.211183	30.9666	31.1778	5	5	31.4363	31.1842	30.6762	31.0962	30.4403	30.7021	31.4323	31.008	31.6618	31.0851
2040	Q8BX10	Q8BX10	Serine/threonine-protein phosphatase PGAM5, mitochondrial	Pgam5	31.994	8.04301	4		0.867913	0.329487	1.1238	NaN	28.2372	0	4	26.5771	26.9727	28.0803	25.308	26.2961	28.0044	28.7084	28.5815	25.9044	27.6544
2044	Q8BXA1	Q8BXA1	Golgi integral membrane protein 4	Golim4	76.784	8.97582	19		0.733278	0.475547	0.6091	31.4039	32.013	5	5	31.9221	32.0462	31.9507	30.1541	30.9466	32.673	32.0499	31.441	31.9711	31.9301
2048	Q8BY87	Q8BY87	Ubiquitin carboxyl-terminal hydrolase 47	Usp47	157.45	8.41152	30		0.552651	0.79598	-0.16975	31.3269	31.1571	5	5	31.5612	31.0162	31.1907	31.5715	31.2948	30.7913	31.2725	31.2476	31.3607	31.1137
2049	Q8BY89	Q8BY89	Choline transporter-like protein 2	Slc44a2	80.109	7.85089	5		1.74666	0.1906	0.698677	NaN	27.8805	0	5	26.8603	27.1552	27.315	27.2238	27.3547	28.2028	27.3426	27.3533	28.314	28.1897
2053	Q8BYK6	Q8BYK6	YTH domain-containing family protein 3	Ythdf3	63.961	8.78447	9		1.44726	0.398147	-0.426118	30.7139	30.2878	5	5	30.9186	30.8623	30.9466	30.5375	30.3047	30.1684	30.1295	30.0251	30.5541	30.5619
2055	Q8BYU6	Q8BYU6	Torsin-1A-interacting protein 2	Tor1aip2	54.495	7.87823	6		0.844446	0.406018	-0.760968	27.5549	NaN	4	0	26.8453	26.9308	26.601	29.1177	27.3259	26.7884	26.8895	26.2723	26.6759	26.3899
2058	Q8BZQ7	Q8BZQ7	Anaphase-promoting complex subunit 2	Anapc2	95.306	7.2823	4		0.915027	0.37631	0.760351	26.5231	NaN	5	0	26.8808	26.8455	25.5132	26.6722	26.7037	28.2227	27.5548	27.0205	26.076	27.5431
2061	Q8BZW8	Q8BZW8	NHL repeat-containing protein 2	Nhlrc2	78.429	8.49853	9		0.181208	0.878604	-0.299607	29.9768	30.2404	5	4	29.2551	29.9716	30.3527	30.198	30.1064	31.1441	29.787	29.5985	30.432	27.4242
2063	Q8C052	Q8C052	Microtubule-associated protein 1S;MAP1S heavy chain;MAP1S light chain	Map1s	102.94	8.25928	13		0.401453	0.785194	0.249402	29.5933	29.8427	5	5	29.8829	30.1077	29.8365	28.8505	29.2889	29.5319	29.7934	29.4786	30.26	30.1496
2065	Q8C0C7;E9Q9R9	Q8C0C7	Phenylalanine--tRNA ligase alpha subunit	Farsa	57.598	8.89046	20		0.294923	0.884877	-0.126037	31.2523	31.1262	5	5	31.098	31.4829	31.4421	30.7841	31.4541	31.1145	30.7951	30.9384	31.3985	31.3846
2066	Q8C0D5	Q8C0D5	Elongation factor Tu GTP-binding domain-containing protein 1	Eftud1	125.78	7.04595	2		0.795503	0.562215	0.385118	26.5048	26.9768	4	1	26.7918	26.3727	26.6536	26.8182	26.201	26.9768	27.7173	26.6012	26.4692	26.9983
2067	Q8C0E2	Q8C0E2	Vacuolar protein sorting-associated protein 26B	Vps26b	39.124	8.52626	5		0.511518	0.537394	-0.997364	29.3067	28.3093	5	5	30.2564	30.9697	29.7394	27.6145	27.9533	29.4264	27.5156	26.9534	27.4144	30.2366
2068	Q8C0E3	Q8C0E3	Tripartite motif-containing protein 47	Trim47	69.912	8.36207	5		0.0832233	0.960226	0.0647888	29.3982	29.463	5	5	29.7252	29.5479	29.8785	29.112	28.7274	29.665	29.1703	28.8932	29.9642	29.6223
2070	Q8C0M9	Q8C0M9	Isoaspartyl peptidase/L-asparaginase;Isoaspartyl peptidase/L-asparaginase alpha chain;Isoaspartyl peptidase/L-asparaginase beta chain	Asrgl1	33.95	8.84318	7		0.283077	0.831956	0.263829	30.2167	30.4805	5	5	29.8336	30.5061	31.3158	29.9287	29.4991	30.4573	30.2089	30.0461	31.3581	30.332
2073	Q8C102	Q8C102	Polypeptide N-acetylgalactosaminyltransferase 5	Galnt5	105.78	7.57898	7		1.83408	0.0704151	-1.37154	28.4093	NaN	4	0	28.2709	28.4877	28.5959	26.8506	28.2826	26.9455	27.2774	25.8663	27.4023	26.1385
2074	Q8C129	Q8C129	Leucyl-cystinyl aminopeptidase	Lnpep	117.3	7.93678	7		0.106924	0.925909	0.151543	28.6549	28.8065	5	5	29.2124	29.3744	28.0565	28.1429	28.4884	30.196	28.694	27.5848	28.1953	29.3623
2077	Q8C166	Q8C166	Copine-1	Cpne1	58.886	8.8125	18		0.305804	0.892662	0.113269	30.8423	30.9556	5	5	30.8427	30.6836	30.8777	31.2138	30.5935	30.7093	31.0968	31.3452	30.8419	30.7845
2079	Q8C181	Q8C181	Muscleblind-like protein 2	Mbnl2	40.156	8.58152	9	+	4.81996	0	3.37719	NaN	29.645	0	5	25.8388	27.3678	26.3297	25.4809	26.3221	29.8659	30.0247	29.7274	29.6298	28.9774
2080	Q8C1A5	Q8C1A5	Thimet oligopeptidase	Thop1	78.025	8.84337	34		0.0394002	0.990434	0.0161663	31.7635	31.7797	5	5	31.609	31.55	31.6628	32.2244	31.7712	31.5067	31.801	31.9579	31.8944	31.7383
2081	Q8C1B7	Q8C1B7	Septin-11	40787	49.694	9.72069	35		0.426198	0.875784	0.114283	33.7684	33.8827	5	5	33.6798	33.724	33.5708	34.1504	33.7171	33.7582	33.7877	33.7716	34.106	33.99
2083	Q8C2Q3	Q8C2Q3	RNA-binding protein 14	Rbm14	69.448	9.39855	18		1.05199	0.490899	0.372751	32.6828	33.0556	5	5	32.6365	32.115	32.9147	32.9994	32.7487	33.1812	33.2246	33.0507	33.2033	32.6182
2084	Q8C460	Q8C460	ERI1 exoribonuclease 3	Eri3	37.189	7.85534	3	+	2.12647	0.0292	1.80304	NaN	28.0253	0	4	26.0001	26.0837	26.447	26.4457	24.7282	27.94	27.8056	27.3236	29.032	26.6187
2090	Q8C570	Q8C570	mRNA export factor	Rae1	40.965	8.982	10		0.348586	0.863025	-0.150161	30.7347	30.5845	5	5	30.7216	30.3307	30.5586	31.1438	30.9187	30.3027	30.7014	30.9492	30.6681	30.3012
2092	Q8C5N3	Q8C5N3	Pre-mRNA-splicing factor CWC22 homolog	Cwc22	104.77	7.25493	5		0.0766754	0.958916	-0.0818256	26.4537	26.2635	5	4	26.8584	26.6112	26.3599	26.6022	25.8367	27.0604	26.4969	25.0583	26.4384	26.8052
2094	Q8C5W3	Q8C5W3	Tubulin-specific chaperone cofactor E-like protein	Tbcel	48.031	8.05339	4		0.949425	0.312191	-0.987352	28.7425	28.055	5	4	28.8034	28.0487	28.5105	29.199	29.1505	28.3977	26.8035	29.3221	27.6965	26.5557
2095	Q8C650	Q8C650	Septin-10	40422	52.422	8.42791	9		0.126404	0.934955	-0.0872635	29.5685	29.4812	5	5	29.8857	29.6865	29.8736	29.4063	28.9905	29.4439	29.9796	29.8001	28.8199	29.3627
2097	Q8C6G8	Q8C6G8	WD repeat-containing protein 26	Wdr26	70.543	7.95847	9		0.631328	0.476352	-0.809993	28.6375	28.7269	5	3	29.0619	28.7712	27.7865	28.8811	28.687	27.1102	28.5283	28.8285	25.8467	28.824
2099	Q8C6K9;A6H584	Q8C6K9	Collagen alpha-6(VI) chain	Col6a6	246.32	8.4346	32		0.409439	0.753896	0.307872	31.5974	31.9053	5	5	32.0798	32.2633	31.0196	30.9098	31.7146	31.7874	31.9295	31.2262	32.192	32.3913
2103	Q8C7R4	Q8C7R4	Ubiquitin-like modifier-activating enzyme 6	Uba6	117.96	8.20252	30		0.202362	0.904271	-0.131705	30.2276	30.0958	5	5	29.9058	29.6874	30.0958	30.8338	30.6149	29.8228	30.3556	30.0933	30.4851	29.7224
2104	Q8C7V3	Q8C7V3	U3 small nucleolar RNA-associated protein 15 homolog	Utp15	59.374	7.55339	4		0.000520086	0.999844	-0.000767136	27.1457	27.5263	4	1	27.3194	28.4566	26.7645	26.2402	27.1216	27.5263	26.6356	26.1928	28.0116	27.5322
2105	Q8C7X2	Q8C7X2	ER membrane protein complex subunit 1	Emc1	111.6	7.58572	11		0.549017	0.749802	-0.232737	27.9613	27.9181	5	2	27.8934	28.1504	28.4528	27.4991	27.8105	27.7825	28.0536	27.6807	27.3061	27.8197
2106	Q8C854	Q8C854	Myelin expression factor 2	Myef2	63.294	8.69212	17		0.0479771	0.986933	-0.0257824	30.6365	30.6107	5	5	30.3469	30.2869	30.7546	31.1781	30.6158	30.3004	30.7423	30.708	30.449	30.8536
2108	Q8C878	Q8C878	NEDD8-activating enzyme E1 catalytic subunit	Uba3	51.737	7.7093	2		0.784283	0.432701	0.740591	27.667	27.4884	1	5	26.5534	25.5265	26.7783	27.214	27.667	27.5605	26.9387	27.0019	27.2361	28.705
2109	Q8C8R3	Q8C8R3	Ankyrin-2	Ank2	426.26	7.21235	17		0.071073	0.953354	-0.135032	28.2244	28.0894	5	5	28.4608	29.8123	26.9785	26.4105	29.4602	28.0943	27.9139	27.7675	28.6758	27.9957
2110	Q8C8U0	Q8C8U0	Liprin-beta-1	Ppfibp1	108.54	7.77492	9		0.0208581	0.99039	0.0309387	28.1728	28.4602	5	4	28.2744	28.9892	29.0728	26.9426	27.5851	28.6237	27.178	27.8327	28.7673	28.6171
2112	Q8CAQ8	Q8CAQ8	MICOS complex subunit Mic60	Immt	83.899	9.32531	36		1.29656	0.476172	0.343402	33.4044	33.7478	5	5	33.3371	33.6135	33.591	33.4508	33.0294	33.843	33.7672	33.6541	34.0549	33.4197
2113	Q8CAY6	Q8CAY6	Acetyl-CoA acetyltransferase, cytosolic	Acat2	41.297	8.11836	4		0.603705	0.495354	-0.774163	28.3275	28.3807	4	2	27.2679	28.1952	28.2982	28.7847	28.032	25.3005	28.0624	28.6989	27.2324	27.4129
2118	Q8CBY8	Q8CBY8	Dynactin subunit 4	Dctn4	53.056	7.76926	6		0.585935	0.598361	-0.448508	27.5765	27.128	5	5	27.3182	27.0207	27.9454	26.8627	28.7354	27.4198	26.8003	27.3465	26.8024	27.2708
2120	Q8CC35	Q8CC35	Synaptopodin	Synpo	99.55	7.51493	5		0.369533	0.82604	0.196043	27.7913	27.817	4	3	27.4053	27.7471	28.5663	27.4631	27.4466	27.7523	27.9865	27.7123	28.1659	27.9916
2123	Q8CCF0	Q8CCF0	U4/U6 small nuclear ribonucleoprotein Prp31	Prpf31	55.429	8.67899	11		0.1993	0.902592	0.123515	30.2324	30.3559	5	5	29.976	30.3638	30.5057	29.7443	30.5724	30.1793	29.8549	30.2223	30.9739	30.5494
2125	Q8CCJ3	Q8CCJ3	E3 UFM1-protein ligase 1	Ufl1	89.519	8.05204	12		0.117035	0.915687	-0.191507	29.0486	28.8571	5	5	29.5464	29.8522	29.8779	28.3462	27.6204	29.4746	28.9584	27.5589	28.3639	29.9297
2126	Q8CCK0	Q8CCK0	Core histone macro-H2A.2	H2afy2	40.092	9.25981	17		0.386282	0.774776	-0.278317	32.0997	31.8213	5	5	31.8953	32.4873	31.5569	31.7358	32.823	31.8408	31.1883	31.5468	32.4155	32.1153
2128	Q8CD15	Q8CD15	Bifunctional lysine-specific demethylase and histidyl-hydroxylase MINA	Mina	53.516	7.80827	2		1.9976	0.12835	-0.800356	27.6559	NaN	5	0	27.4539	27.4969	28.4059	27.5935	27.3292	26.4567	26.6245	27.1077	27.2084	26.8803
2129	Q8CD91	Q8CD91	SPARC-related modular calcium-binding protein 2	Smoc2	49.891	8.60762	17		0.092503	0.959335	-0.0684139	30.0582	29.9898	5	5	29.7981	30.3868	30.8193	29.6673	29.6194	29.994	29.5844	30.4499	30.0235	29.8969
2130	Q8CDG3	Q8CDG3	Deubiquitinating protein VCIP135	Vcpip1	134.5	7.57702	6		0.419083	0.651415	-0.643872	28.4378	28.4776	5	4	28.6236	28.419	28.55	28.1797	28.4167	28.5088	28.626	28.1192	28.6565	25.0592
2134	Q8CDN6	Q8CDN6	Thioredoxin-like protein 1	Txnl1	32.237	9.83229	15		0.00793256	0.995363	0.00501251	33.6945	33.6995	5	5	33.4589	33.2498	33.6242	34.2471	33.8924	33.3866	33.7476	34.1206	33.7328	33.5099
2136	Q8CEC0	Q8CEC0	Nuclear pore complex protein Nup88	Nup88	84.937	8.13245	9		0.572017	0.794008	-0.173642	29.261	29.0873	5	5	29.3517	29.3151	28.9609	29.3462	29.331	29.1374	28.9255	28.696	29.3814	29.2964
2137	Q8CEC6	Q8CEC6	Peptidylprolyl isomerase domain and WD repeat-containing protein 1	Ppwd1	73.384	7.9301	10		0.413151	0.724432	-0.373274	28.5684	28.1951	5	5	29.2634	29.0044	28.4426	28.1294	28.0022	28.0302	27.1737	27.9838	28.7849	29.0031
2138	Q8CEG0	Q8CEG0	Pannexin-3	Panx3	44.928	8.21798	5		1.36964	0.181307	-1.03419	28.043	28.0269	5	1	28.4301	29.0507	28.1846	27.2992	27.2506	26.7643	26.6299	26.8729	26.7502	28.0269
2139	Q8CF89	Q8CF89	TGF-beta-activated kinase 1 and MAP3K7-binding protein 1	Tab1	54.616	7.90071	4		0.885518	0.36759	0.847388	28.1132	28.2815	3	5	26.5189	26.3121	27.4417	28.9392	27.9586	28.0222	28.2047	28.3714	28.7918	28.0173
2142	Q8CFI7	Q8CFI7	DNA-directed RNA polymerase II subunit RPB2	Polr2b	133.91	8.06978	16		0.320957	0.802351	-0.271725	29.6456	29.3738	5	5	29.7077	30.3724	29.752	28.7757	29.6199	29.3763	29.2505	29.3334	28.6391	30.2699
2144	Q8CFV9	Q8CFV9	Riboflavin kinase	Rfk	17.437	8.15357	4		1.34893	0.29215	-0.621416	27.5129	NaN	5	0	27.4475	27.3577	27.6099	27.9032	27.2463	27.3902	27.119	27.2116	26.0893	26.6473
2145	Q8CFX1	Q8CFX1	GDH/6PGL endoplasmic bifunctional protein;Glucose 1-dehydrogenase;6-phosphogluconolactonase	H6pd	88.927	8.84242	25		0.331929	0.882767	-0.11967	31.6998	31.5802	5	5	31.4117	31.7264	31.9361	31.407	32.018	31.6224	31.537	31.2561	31.7342	31.7511
2147	Q8CG19	Q8CG19	Latent-transforming growth factor beta-binding protein 1	Ltbp1	186.72	8.50478	20		0.470748	0.741646	0.281196	31.5227	31.8039	5	5	31.331	31.2002	31.4015	32.3001	31.381	31.5491	32.1633	32.2745	31.8027	31.2302
2148	Q8CG47	Q8CG47	Structural maintenance of chromosomes protein 4	Smc4	146.89	8.34655	26		0.617789	0.580441	0.482772	30.594	31.0767	5	5	29.9694	31.1631	31.2045	30.061	30.5719	31.5912	30.6578	30.1913	31.4881	31.4554
2149	Q8CG48	Q8CG48	Structural maintenance of chromosomes protein 2	Smc2	134.24	8.63325	39		0.0727534	0.980758	0.0268166	31.778	31.8049	5	5	31.585	31.6899	31.9421	31.7352	31.938	31.5309	31.7707	31.6237	32.1681	31.9309
2150	Q8CG70	Q8CG70	Prolyl 3-hydroxylase 3	Leprel2	81.7	9.49759	31		0.13834	0.94542	-0.0651649	33.512	33.4468	5	5	33.4048	33.7232	33.7048	33.0175	33.7095	33.3845	33.0304	33.6064	33.7065	33.5063
2151	Q8CG71	Q8CG71	Prolyl 3-hydroxylase 2	Leprel1	80.153	8.35027	16		0.220897	0.904395	-0.100137	30.0598	29.9596	5	5	29.9124	29.7599	30.1481	30.2625	30.216	30.1556	29.4058	29.8666	30.322	30.0483
2152	Q8CG72	Q8CG72	Poly(ADP-ribose) glycohydrolase ARH3	Adprhl2	39.414	8.34486	2		0.233616	0.866982	-0.230164	28.5262	28.625	5	4	28.0871	28.1807	28.5277	28.9936	28.842	28.08	28.599	28.9027	28.9182	26.9805
2153	Q8CG76	Q8CG76	Aflatoxin B1 aldehyde reductase member 2	Akr7a2	40.612	8.80524	11		0.20461	0.915861	0.0860016	30.4032	30.4892	5	5	30.449	30.4995	30.6173	30.5325	29.9176	30.6642	30.2634	30.3684	30.8485	30.3015
2154	Q8CGA0	Q8CGA0	Protein phosphatase 1F	Ppm1f	49.61	7.94557	7		0.67618	0.492301	-0.62395	27.89	27.6181	5	4	28.4753	27.714	26.9448	28.4172	27.8988	27.2554	27.79	27.7554	27.6718	25.8578
2156	Q8CGB6	Q8CGB6	Tensin-2	Tns2	152.01	8.34313	22		1.5601	0.475262	0.309268	30.8614	31.1707	5	5	30.8618	31.1042	30.863	30.873	30.605	30.9185	31.1051	31.433	31.2255	31.1712
2158	Q8CGC7	Q8CGC7	Bifunctional glutamate/proline--tRNA ligase;Glutamate--tRNA ligase;Proline--tRNA ligase	Eprs	170.08	9.42487	96		0.126145	0.9639	-0.0390709	34.7613	34.7223	5	5	34.6374	34.7666	34.9236	34.5459	34.9332	34.747	34.6198	34.4415	34.946	34.8571
2160	Q8CGF7	Q8CGF7	Transcription elongation regulator 1	Tcerg1	123.79	7.7377	8		0.670163	0.476888	-0.70747	27.667	NaN	5	0	27.7157	27.7714	29.1618	26.6129	27.0734	27.318	27.5983	26.7659	25.8953	27.2203
2161	Q8CGK3	Q8CGK3	Lon protease homolog, mitochondrial	Lonp1	105.84	8.44988	26		0.923571	0.651019	0.245503	30.4992	30.7447	5	5	30.4793	30.4445	30.6244	30.084	30.8637	30.8163	30.6545	30.6304	30.9465	30.6758
2162	Q8CGN4	Q8CGN4	BCL-6 corepressor	Bcor	192.63	8.17635	1		0.643572	0.386692	2.24447	31.8913	31.6399	2	4	25.9359	26.5384	26.1056	32.021	31.7616	30.405	31.9818	32.6461	31.5268	27.0251
2164	Q8CGY8	Q8CGY8	UDP-N-acetylglucosamine--peptide N-acetylglucosaminyltransferase 110 kDa subunit	Ogt	116.95	7.82465	16		0.135831	0.950798	0.056163	28.561	28.6172	5	5	28.47	28.6888	28.8839	28.2174	28.5452	28.2853	28.6463	28.9813	28.5287	28.6445
2165	Q8CGZ0	Q8CGZ0	Calcium homeostasis endoplasmic reticulum protein	Cherp	106.17	8.38498	10		0.148201	0.931852	0.0792313	29.9637	30.0429	5	5	30.0797	30.0772	29.9176	29.9913	29.7527	29.9098	30.7306	29.6396	30.2043	29.7303
2166	Q8CH18	Q8CH18	Cell division cycle and apoptosis regulator protein 1	Ccar1	132.06	8.50944	25		2.33175	0.43172	-0.298967	30.9669	30.6679	5	5	30.857	30.9338	30.9732	31.0909	30.9793	30.556	30.9209	30.6875	30.5894	30.5856
2167	Q8CH40	Q8CH40	Nucleoside diphosphate-linked moiety X motif 6	Nudt6	35.197	8.83572	2		1.02996	0.189872	-2.07326	30.7477	30.2708	4	2	30.8409	30.646	28.0651	30.9532	30.5508	30.2609	30.2806	26.0638	26.031	28.0535
2170	Q8CHH9	Q8CHH9	Septin-8	39692	49.812	9.43849	23		0.168755	0.911388	-0.112509	32.7724	32.6599	5	5	32.636	32.5321	32.6266	33.2233	32.8441	32.0662	32.562	32.7785	33.4554	32.4373
2172	Q8CHT0	Q8CHT0	Delta-1-pyrroline-5-carboxylate dehydrogenase, mitochondrial	Aldh4a1	61.84	8.55436	8		0.184814	0.905171	0.128669	30.0312	30.1599	5	5	30.3755	30.3027	30.3988	30.0081	29.0711	29.9436	30.4183	29.8207	30.3018	30.3151
2175	Q8CI11	Q8CI11	Guanine nucleotide-binding protein-like 3	Gnl3	60.786	8.08279	11		0.517091	0.59198	-0.571282	28.9786	29.1272	5	3	28.5889	29.0137	29.4685	29.1328	28.6892	27.6874	28.747	28.7934	29.841	26.9678
2178	Q8CI51	Q8CI51	PDZ and LIM domain protein 5	Pdlim5	63.299	8.97995	15		0.938788	0.743124	0.176415	31.8681	32.0445	5	5	31.7659	31.6323	31.8248	32.0814	32.0363	32.0126	32.2313	32.0789	31.986	31.914
2180	Q8CI94	Q8CI94	Glycogen phosphorylase, brain form	Pygb	96.729	8.01532	23		0.355593	0.784768	-0.283255	29.2714	28.9881	5	5	28.4669	28.9595	29.8098	29.2652	29.8554	29.1744	28.1689	29.3285	29.4518	28.817
2181	Q8CIB5;P59113	Q8CIB5	Fermitin family homolog 2	Fermt2	77.8	8.64823	20		0.846856	0.741851	0.188223	30.8851	31.0733	5	5	30.7064	31.1919	30.9627	30.6297	30.9349	31.2458	31.0435	30.9299	30.983	31.1645
2182	Q8CIE6	Q8CIE6	Coatomer subunit alpha;Xenin;Proxenin	Copa	138.43	9.43173	79		0.374095	0.795907	-0.235889	34.4881	34.2522	5	5	34.6679	34.81	34.7081	33.692	34.5626	34.7332	33.7535	34.0131	34.0942	34.6671
2183	Q8CIG8	Q8CIG8	Protein arginine N-methyltransferase 5	Prmt5	72.679	7.95342	11		0.613856	0.593913	-0.426072	28.8584	28.4323	5	5	28.2961	29.1533	28.9539	28.767	29.1217	29.1541	27.7065	28.7033	27.7326	28.8652
2186	Q8CIN4	Q8CIN4	Serine/threonine-protein kinase PAK 2;PAK-2p27;PAK-2p34	Pak2	57.93	9.13284	21		0.21513	0.901916	0.119062	32.0518	32.1709	5	5	32.1155	31.7417	32.1915	32.2293	31.9811	31.8653	32.4321	32.7897	32.1452	31.622
2187	Q8CJ53	Q8CJ53	Cdc42-interacting protein 4	Trip10	68.489	7.74436	7		1.69732	0.0784286	1.49321	NaN	28.3538	0	4	27.1089	26.401	27.0835	25.1557	26.7518	28.0612	28.4107	28.57	26.552	28.3731
2189	Q8CJG0;Q8CJG1;Q8CJF9	Q8CJG0	Protein argonaute-2	Ago2	97.303	8.26107	17		0.176623	0.90529	-0.131526	30.1352	30.0037	5	5	30.0478	30.4982	30.6194	29.5529	29.958	30.2	29.4227	29.5761	30.1995	30.6203
2190	Q8JZK9	Q8JZK9	Hydroxymethylglutaryl-CoA synthase, cytoplasmic	Hmgcs1	57.568	8.86675	13		1.54463	0.320249	-0.506837	31.3463	30.8394	5	5	31.3058	30.7958	31.5288	31.8822	31.2188	30.9228	30.7664	31.0115	30.6417	30.8548
2192	Q8JZN5	Q8JZN5	Acyl-CoA dehydrogenase family member 9, mitochondrial	Acad9	68.721	7.83836	5		0.43195	0.709928	-0.381529	28.252	28.4816	5	3	28.0883	28.2708	28.0353	28.4326	28.4332	28.6658	26.6828	27.225	28.598	28.181
2194	Q8JZQ9	Q8JZQ9	Eukaryotic translation initiation factor 3 subunit B	Eif3b	91.369	9.12882	30		0.0117295	0.995528	-0.00510483	32.6252	32.6201	5	5	32.2772	32.5491	32.7424	32.7357	32.8215	32.211	32.6478	32.6439	32.8853	32.7123
2195	Q8JZU2	Q8JZU2	Tricarboxylate transport protein, mitochondrial	Slc25a1	33.931	8.43974	6		0.00913626	0.996334	-0.00649376	29.2489	29.2424	5	5	29.4381	29.6891	29.3867	28.7074	29.0233	29.791	29.3704	29.2665	28.83	28.9542
2196	Q8JZX4	Q8JZX4	Splicing factor 45	Rbm17	45.303	8.50531	14		0.0309512	0.988856	0.0262623	29.8945	29.9208	5	5	29.9307	29.9279	30.1348	30.2412	29.238	29.3604	30.3128	30.6259	29.7478	29.557
2198	Q8K009;Q8R0Y6	Q8K009	Mitochondrial 10-formyltetrahydrofolate dehydrogenase	Aldh1l2	101.59	8.24214	17		0.130899	0.926567	0.100121	30.0981	30.1982	5	5	30.054	29.8755	29.8035	29.9373	30.8203	30.1607	29.4682	30.0262	30.7125	30.6236
2201	Q8K019	Q8K019	Bcl-2-associated transcription factor 1	Bclaf1	106	9.00681	22		0.459507	0.773048	0.234052	32.0177	32.2517	5	5	31.8849	32.0277	32.3102	32.1405	31.7251	32.5667	32.7527	32.429	31.6569	31.8533
2204	Q8K0C9	Q8K0C9	GDP-mannose 4,6 dehydratase	Gmds	41.984	8.98219	14		0.52475	0.786247	-0.189291	31.7254	31.5361	5	5	31.4632	31.3025	31.9956	31.8012	32.0644	31.3673	31.7578	31.4988	31.7013	31.3552
2206	Q8K0E8;CON__P02676	Q8K0E8	Fibrinogen beta chain;Fibrinopeptide B;Fibrinogen beta chain	Fgb	54.752	9.46883	29		0.196079	0.896734	-0.153627	33.1661	33.0125	5	5	33.7113	32.7821	32.715	33.3829	33.2393	33.5932	33.5333	33.0439	32.3873	32.5047
2213	Q8K1J6	Q8K1J6	CCA tRNA nucleotidyltransferase 1, mitochondrial	Trnt1	49.895	8.38236	15		0.236373	0.873763	0.196673	29.5832	29.7799	5	5	29.4062	29.3719	29.1816	30.0692	29.8872	29.0903	29.4761	29.5597	30.8399	29.9334
2215	Q8K1M6	Q8K1M6	Dynamin-1-like protein	Dnm1l	82.657	8.54657	30		0.132506	0.951158	0.0584324	31.206	31.2644	5	5	31.245	31.2804	31.4746	31.3292	30.7007	31.4014	30.9535	31.1484	31.5581	31.2605
2217	Q8K1R7	Q8K1R7	Serine/threonine-protein kinase Nek9	Nek9	107.14	8.04052	11		0.0736304	0.968279	0.0547878	29.2888	29.3436	5	5	29.2402	28.8393	29.3522	29.369	29.6432	30.0272	29.694	28.8101	28.855	29.3315
2220	Q8K201	Q8K201	Keratinocyte-associated transmembrane protein 2	Kct2	28.05	8.57788	2		0.633036	0.475245	-0.847188	29.1254	29.2355	5	3	28.5438	29.1607	29.6262	29.2332	29.0629	27.5519	29.0364	29.519	26.1325	29.1511
2222	Q8K224	Q8K224	N-acetyltransferase 10	Nat10	115.42	7.41838	5		1.17332	0.225665	-1.02258	27.7807	27.6552	4	1	27.585	28.3261	27.7481	26.923	27.4635	26.5188	27.3385	25.2683	26.152	27.6552
2223	Q8K268	Q8K268	ATP-binding cassette sub-family F member 3	Abcf3	79.864	7.64857	6		0.529837	0.649831	-0.419273	27.2531	NaN	4	0	28.3763	26.5517	26.9742	27.0765	27.0076	26.3533	27.1515	27.4101	26.5498	26.4254
2224	Q8K274	Q8K274	Ketosamine-3-kinase	Fn3krp	34.468	8.38012	3		1.267	0.144139	1.6111	29.1874	29.0724	2	5	26.3779	26.6145	25.9391	29.2655	29.1092	29.0996	29.0881	29.1096	29.1253	28.9392
2226	Q8K297	Q8K297	Procollagen galactosyltransferase 1	Colgalt1	71.06	9.63642	30		0.189408	0.914162	-0.0961082	33.9498	33.8537	5	5	33.9092	34.2027	34.4815	33.3846	33.771	33.9396	33.7113	33.7885	33.7209	34.1081
2227	Q8K2A1	Q8K2A1	PTB domain-containing engulfment adapter protein 1	Gulp1	34.47	8.35824	5		1.24566	0.295826	0.675601	28.5139	29.1895	5	5	29.006	28.9738	29.0001	27.8979	27.6915	29.1588	29.2874	29.1486	29.3846	28.968
2228	Q8K2B0	Q8K2B0	Synaptonemal complex protein SC65	Leprel4	51.131	9.38712	32		0.333784	0.873216	0.143775	32.7046	32.8484	5	5	32.2854	32.3958	32.9329	33.1362	32.7726	32.7692	32.8488	32.8643	33.176	32.5835
2229	Q8K2B3	Q8K2B3	Succinate dehydrogenase [ubiquinone] flavoprotein subunit, mitochondrial	Sdha	72.585	9.49139	36		0.556504	0.746861	0.233868	33.5876	33.8215	5	5	33.2507	33.2664	33.464	34.1869	33.77	33.5622	33.963	33.8708	34.0676	33.6438
2230	Q8K2C7	Q8K2C7	Protein OS-9	Os9	76.107	8.52516	8		0.041822	0.984065	0.037904	30.4719	30.5098	5	5	30.11	29.8268	30.4905	31.2756	30.6565	30.2706	30.6516	31.1349	30.5571	29.9348
2233	Q8K2D3	Q8K2D3	Enhancer of mRNA-decapping protein 3	Edc3	55.957	8.08286	5		0.567135	0.549755	0.693157	28.8407	29.0546	4	5	28.2062	28.332	29.3734	29.451	26.4444	28.8223	29.1907	29.4697	29.4715	28.3186
2234	Q8K2F0	Q8K2F0	Bromodomain-containing protein 3	Brd3	79.761	8.19212	11		0.295331	0.833581	0.235028	29.2407	29.4758	5	5	29.0636	29.9103	29.6152	29.3952	28.2193	28.9436	29.8419	29.8698	29.3712	29.3524
2239	Q8K2T1	Q8K2T1	NmrA-like family domain-containing protein 1	Nmral1	34.376	8.39622	8		0.934447	0.337333	0.905685	28.5691	29.4748	5	5	28.0371	28.9384	29.7397	28.272	27.8582	29.201	30.1426	29.4397	30.3725	28.218
2240	Q8K2T8	Q8K2T8	RNA polymerase II-associated factor 1 homolog	Paf1	60.518	7.78046	6	+	2.30048	0.0197333	-1.87014	28.5838	NaN	4	0	28.1043	26.7872	28.5221	29.0769	28.6321	27.3558	25.8301	25.7306	26.5403	26.3153
2244	Q8K2Z2	Q8K2Z2	Pre-mRNA-processing factor 39	Prpf39	77.92	7.18546	3		0.00712309	0.996151	-0.00796776	26.5569	NaN	4	0	26.2802	26.2016	26.2972	26.4108	27.4485	25.4388	26.7827	26.4002	26.7692	27.2075
2247	Q8K310	Q8K310	Matrin-3	Matr3	94.629	9.47829	42		0.18183	0.929951	0.0709251	33.6234	33.6944	5	5	33.9118	33.7721	33.8377	33.2886	33.307	33.7589	33.4929	33.6518	33.6264	33.9419
2248	Q8K327	Q8K327	Chromosome alignment-maintaining phosphoprotein 1	Champ1	87.56	7.78788	8		1.79995	0.272756	0.504995	28.5346	29.0396	5	5	28.2115	28.589	28.5981	28.8832	28.3915	29.228	29.4176	28.8973	28.7693	28.8859
2249	Q8K363	Q8K363	ATP-dependent RNA helicase DDX18	Ddx18	74.18	7.56215	6		1.57517	0.17526	-0.860954	27.5861	NaN	5	0	27.0408	27.7098	27.4815	27.1552	28.543	27.1628	26.3368	26.3412	26.7412	27.0436
2252	Q8K3H0	Q8K3H0	DCC-interacting protein 13-alpha	Appl1	79.327	8.3309	14		0.0440883	0.988919	-0.0195049	30.0171	29.9976	5	5	29.972	29.7908	29.8303	30.4449	30.0477	29.8079	30.0448	30.0659	30.3244	29.7452
2253	Q8K3J1	Q8K3J1	NADH dehydrogenase [ubiquinone] iron-sulfur protein 8, mitochondrial	Ndufs8	24.038	8.70357	7		0.02589	0.98811	-0.0548229	29.2606	29.2058	5	5	31.2833	30.3795	29.084	27.9397	27.6166	28.928	28.9606	28.7919	29.9424	29.4061
2254	Q8K3X4	Q8K3X4	Interferon regulatory factor 2-binding protein-like	Irf2bpl	80.564	7.99427	12		0.514619	0.588257	0.613733	28.9216	29.0427	4	5	28.7644	29.0194	29.4292	28.4734	26.4584	29.521	29.1592	29.0903	28.2237	29.2193
2255	Q8K411	Q8K411	Presequence protease, mitochondrial	Pitrm1	117.37	8.35257	23		0.183732	0.918967	0.0872005	30.5521	30.6393	5	5	30.07	30.6778	30.5434	30.4363	31.0332	30.3194	30.6964	30.5239	30.7219	30.9352
2257	Q8K4B0	Q8K4B0	Metastasis-associated protein MTA1	Mta1	80.797	8.27333	17		0.511165	0.741041	-0.258309	30.008	29.7497	5	5	29.9609	30.4672	30.2509	29.6428	29.7181	29.4495	29.3445	29.6928	29.9195	30.3421
2258	Q8K4G1	Q8K4G1	Latent-transforming growth factor beta-binding protein 4	Ltbp4	178.64	8.28012	9		1.06046	0.476584	0.386428	30.6891	31.0755	5	5	30.7173	30.37	31.1763	30.8626	30.3192	31.0608	31.4556	30.7689	30.9081	31.1842
2261	Q8K4L3	Q8K4L3	Supervillin	Svil	243.16	7.11398	9		1.47639	0.208343	-0.796668	27.6818	NaN	5	0	27.5834	28.001	27.4792	27.4651	27.8803	27.9847	26.3258	26.4898	26.8431	26.7824
2262	Q8K4P0	Q8K4P0	pre-mRNA 3 end processing protein WDR33	Wdr33	145.27	7.70414	5		0.267466	0.882462	-0.146984	28.4388	28.2918	5	5	28.7417	28.7891	28.4342	27.9139	28.3149	28.4825	27.8711	27.9949	28.3209	28.7895
2266	Q8K4Z5	Q8K4Z5	Splicing factor 3A subunit 1	Sf3a1	88.544	9.24105	41		0.98037	0.547658	0.342462	32.9247	33.2672	5	5	32.9235	33.1461	33.2971	32.8517	32.4053	32.922	33.3787	33.3732	33.5391	33.123
2268	Q8N7N5	Q8N7N5	DDB1- and CUL4-associated factor 8	Dcaf8	66.031	8.62005	15		0.258338	0.863146	0.21311	30.5245	30.7376	5	5	29.773	30.0471	30.4336	31.3249	31.0441	30.8077	30.6792	30.6511	31.333	30.2172
2270	Q8QZT1	Q8QZT1	Acetyl-CoA acetyltransferase, mitochondrial	Acat1	44.816	10.1127	31		1.08885	0.491974	0.364236	34.8196	35.1839	5	5	34.6342	34.6407	34.9171	35.0451	34.861	34.7453	35.2664	35.501	35.5495	34.8572
2271	Q8QZV7	Q8QZV7	Protein asunder homolog	Asun	82.779	7.63071	5		0.0924264	0.971706	0.0348042	27.9731	28.0079	5	5	28.1608	28.059	27.6964	27.8857	28.0635	27.6992	28.0224	28.3674	27.8674	28.0831
2272	Q8QZY1	Q8QZY1	Eukaryotic translation initiation factor 3 subunit L	Eif3l	66.612	8.84479	20		0.170034	0.910058	-0.119558	31.3096	31.1901	5	5	30.8522	31.1773	31.5137	31.3439	31.661	31.7046	31.2974	31.074	30.3414	31.5329
2273	Q8QZY9	Q8QZY9	Splicing factor 3B subunit 4	Sf3b4	44.355	8.04614	3		1.65876	0.126835	1.03411	27.5378	28.2456	4	5	27.4195	27.5625	27.9128	25.9063	27.2562	28.0713	28.4234	28.4031	28.4775	27.8525
2274	Q8R001	Q8R001	Microtubule-associated protein RP/EB family member 2	Mapre2	36.946	8.94428	11		0.169934	0.90109	-0.153856	30.6764	30.5225	5	5	31.223	31.3727	30.9709	30.2171	29.5983	30.7522	30.2784	30.3403	30.8576	30.3841
2275	Q8R010	Q8R010	Aminoacyl tRNA synthase complex-interacting multifunctional protein 2	Aimp2	35.377	8.64763	9		0.581048	0.687947	0.30519	29.4935	29.7987	5	5	29.2919	29.6998	30.1775	29.0154	29.2828	30.0953	29.8122	29.53	30.1628	29.393
2276	Q8R050	Q8R050	Eukaryotic peptide chain release factor GTP-binding subunit ERF3A	Gspt1	68.625	9.44534	29		0.0215795	0.992712	0.00830612	33.3177	33.326	5	5	33.0851	33.1872	33.2462	33.7284	33.3418	33.1401	33.4653	33.4881	33.3642	33.1725
2277	Q8R054	Q8R054	Sushi repeat-containing protein SRPX2	Srpx2	53.14	9.1712	20		1.30726	0.560766	-0.272432	32.0906	31.8182	5	5	32.3171	31.7621	32.2173	32.1813	31.9753	32.0328	31.8234	31.6689	31.7147	31.8512
2278	Q8R059	Q8R059	UDP-glucose 4-epimerase	Gale	38.224	9.21817	17		1.13087	0.582639	-0.276835	31.9324	31.6555	5	5	32.0121	31.6724	32.0186	32.2178	31.7409	31.3926	31.9212	31.7576	31.6664	31.5398
2279	Q8R081	Q8R081	Heterogeneous nuclear ribonucleoprotein L	Hnrnpl	63.963	10.1984	43		1.33927	0.589893	0.242696	35.1188	35.3615	5	5	35.0148	35.073	35.1418	35.3934	34.971	35.1868	35.4014	35.6008	35.3621	35.2565
2283	Q8R0F6	Q8R0F6	Integrin-linked kinase-associated serine/threonine phosphatase 2C	Ilkap	42.774	8.77288	12		0.263541	0.898979	-0.115294	30.7483	30.633	5	5	30.6327	30.9333	30.4086	30.9766	30.7901	30.2433	30.7392	31.1218	30.4168	30.6437
2286	Q8R0H9	Q8R0H9	ADP-ribosylation factor-binding protein GGA1	Gga1	69.971	8.57904	5		1.3559	0.231605	0.783305	29.6112	30.3945	5	5	28.5662	29.6641	30.1133	29.7272	29.9851	30.5066	30.3977	29.8359	30.9557	30.2764
2287	Q8R0S2;Q5DU25	Q8R0S2	IQ motif and SEC7 domain-containing protein 1	Iqsec1	108.01	7.58514	7	+	3.16468	0.01	-1.54676	28.1697	NaN	5	0	28.6258	28.3332	28.0863	27.7124	28.0909	26.383	25.8085	27.201	26.7113	27.0111
2290	Q8R180;Q8R2E9	Q8R180	ERO1-like protein alpha	Ero1l	54.084	8.20164	12		0.24423	0.875928	-0.179292	29.1566	28.9773	5	5	29.2525	29.3892	29.2217	29.0601	28.8594	28.8835	28.2215	28.7789	29.0024	30.0001
2292	Q8R1B4	Q8R1B4	Eukaryotic translation initiation factor 3 subunit C	Eif3c	105.53	9.18313	30		0.272765	0.90402	-0.103226	32.9354	32.8322	5	5	32.9493	33.0063	32.9888	32.6992	33.0334	33.2749	32.7253	32.4039	33.0108	32.746
2293	Q8R1F1	Q8R1F1	Niban-like protein 1	Fam129b	84.818	8.62738	21		0.202932	0.909461	0.0980576	30.7689	30.867	5	5	31.2665	30.6567	31.1221	30.4922	30.3072	31.1024	30.8119	30.7746	30.8799	30.7661
2295	Q8R1Q8	Q8R1Q8	Cytoplasmic dynein 1 light intermediate chain 1	Dync1li1	56.614	9.09503	22		0.695884	0.708751	0.234363	32.1507	32.3851	5	5	31.9391	31.9011	32.1397	32.5793	32.1946	32.2084	32.6585	32.5696	32.462	32.0269
2296	Q8R1V4	Q8R1V4	Transmembrane emp24 domain-containing protein 4	Tmed4	26.022	8.38117	6		0.0295131	0.989289	0.0319611	28.4717	28.5036	5	5	28.3912	29.6703	28.4261	27.7172	28.1535	28.7751	28.8808	28.2359	27.8964	28.73
2297	Q8R1X6	Q8R1X6	Spartin	Spg20	72.654	8.70489	16		0.0207704	0.992498	0.0182251	30.9635	30.9817	5	5	30.5368	30.5475	30.7186	31.5859	31.4286	30.4282	31.0934	31.4494	31.3311	30.6063
2298	Q8R2G6	Q8R2G6	Coiled-coil domain-containing protein 80	Ccdc80	107.61	8.13011	16		0.354933	0.741199	-0.448762	29.5131	29.0644	5	5	29.6656	30.0515	29.8884	28.7421	29.2181	30.517	27.5136	28.5881	29.1232	29.5799
2299	Q8R2H9	Q8R2H9	Phosphoethanolamine/phosphocholine phosphatase	Phospho1	29.911	8.43537	10		0.139817	0.90962	-0.16909	29.3096	29.1405	5	5	30.2723	29.9822	29.4128	28.5376	28.3429	28.8367	28.5728	29.1361	30.1166	29.0403
2302	Q8R2T8	Q8R2T8	General transcription factor 3C polypeptide 5	Gtf3c5	60.501	7.07339	2		0.277424	0.837502	-0.248272	NaN	26.6686	0	5	26.4109	26.0347	28.1463	26.8006	27.1917	26.7982	26.8498	26.7189	26.6877	26.2881
2303	Q8R2U0	Q8R2U0	Nucleoporin SEH1	Seh1l	39.774	8.69921	9		0.371374	0.798193	0.231583	30.29	30.5216	5	5	29.7513	29.9983	30.1884	30.9931	30.5192	30.2157	30.8946	30.8581	30.6027	30.0371
2306	Q8R2Y2	Q8R2Y2	Cell surface glycoprotein MUC18	Mcam	71.545	7.49321	5	+	2.28432	0.0437619	1.24613	NaN	27.4044	0	5	26.8921	25.4671	25.3247	26.4709	26.6365	27.2878	27.5712	27.2851	27.5953	27.2825
2307	Q8R2Y8	Q8R2Y8	Peptidyl-tRNA hydrolase 2, mitochondrial	Ptrh2	19.526	8.45407	5		0.648288	0.692691	-0.264097	28.5508	28.2867	5	5	28.3739	28.7217	28.5926	29.0739	27.992	28.3743	28.3667	28.4237	27.9361	28.3327
2308	Q8R2Z5	Q8R2Z5	von Willebrand factor A domain-containing protein 1	Vwa1	44.708	8.68857	10		0.254725	0.887045	0.141182	29.9363	30.0775	5	5	29.6621	30.2156	30.0774	30.0986	29.628	29.6509	30.1764	30.2179	29.6545	30.6878
2310	Q8R323	Q8R323	Replication factor C subunit 3	Rfc3	40.526	8.00728	6		0.004761	0.9946	-0.00914001	28.0593	27.9223	4	4	28.4776	27.9411	28.6666	27.1517	25.9016	28.926	27.8615	26.4038	27.434	27.4676
2311	Q8R326	Q8R326	Paraspeckle component 1	Pspc1	58.758	8.48796	13		0.439967	0.769172	0.251966	29.53	29.7819	5	5	29.5789	30.2961	29.4432	29.2552	29.0763	29.3705	29.7151	29.6513	30.322	29.8506
2312	Q8R349	Q8R349	Cell division cycle protein 16 homolog	Cdc16	71.459	8.71567	17		0.436201	0.793316	-0.210767	30.8212	30.6104	5	5	30.4408	30.8138	30.845	30.8266	31.1796	30.7422	30.3895	30.1096	31.2246	30.586
2314	Q8R3B1	Q8R3B1	1-phosphatidylinositol 4,5-bisphosphate phosphodiesterase delta-1	Plcd1	85.872	9.25744	37		0.125151	0.94947	-0.0636902	32.9135	32.8498	5	5	32.4905	32.6645	32.897	33.2541	33.2615	32.4321	32.8371	32.8655	33.103	33.0114
2317	Q8R3G1	Q8R3G1	Nuclear inhibitor of protein phosphatase 1	Ppp1r8	38.527	8.20629	5		0.618525	0.55847	-0.543872	27.9551	28.6667	5	1	27.431	28.104	28.4521	28.0328	27.7554	26.5732	27.8526	28.6667	27.3365	26.6271
2319	Q8R3N6	Q8R3N6	THO complex subunit 1	Thoc1	75.435	7.57451	5		1.46303	0.155175	-1.05381	27.9873	NaN	5	0	27.4455	28.081	28.6534	28.0042	27.7525	26.8329	26.4162	26.0078	28.0934	27.3171
2323	Q8R3Y8	Q8R3Y8	Interferon regulatory factor 2-binding protein 1	Irf2bp1	61.75	8.38709	18		1.35895	0.372566	0.479482	29.8845	30.364	5	5	29.7569	30.0795	30.3991	29.7528	29.4343	30.1348	30.5533	30.472	30.615	30.0449
2325	Q8R422	Q8R422	CD109 antigen	Cd109	161.66	7.9257	16		0.056035	0.980855	-0.036882	29.3967	29.3598	5	5	29.0959	29.3638	29.0027	29.7485	29.7727	29.8564	29.4628	28.8808	29.517	29.0822
2326	Q8R429	Q8R429	Sarcoplasmic/endoplasmic reticulum calcium ATPase 1	Atp2a1	109.42	8.87953	22		0.0200247	0.990203	0.0405773	31.373	31.4136	5	5	32.451	32.3045	30.27	30.711	31.1285	33.0081	30.6711	29.8408	31.5327	32.0151
2333	Q8R4W6	Q8R4W6	Procollagen C-endopeptidase enhancer 2	Pcolce2	45.408	8.6071	11		0.421953	0.782183	0.239908	29.8085	30.0484	5	5	30.2087	30.1527	29.6311	29.3849	29.6649	30.111	29.2841	30.0855	30.3354	30.4259
2334	Q8R4X3	Q8R4X3	RNA-binding protein 12	Rbm12	102.8	8.06778	7		1.02189	0.589623	0.279907	28.5228	28.8027	5	5	28.5773	28.6029	28.7454	28.3463	28.3422	28.7231	28.5075	28.5873	29.0785	29.1173
2337	Q8R5A0	Q8R5A0	N-lysine methyltransferase SMYD2	Smyd2	49.566	7.60353	2		0.864843	0.463177	0.547488	26.8297	NaN	4	0	27.3315	26.7401	25.7235	26.8195	26.4278	27.6794	26.8527	26.7896	26.8567	27.6014
2338	Q8R5C5	Q8R5C5	Beta-centractin	Actr1b	42.281	9.26869	19		0.0786481	0.969762	0.0446869	32.0317	32.0764	5	5	31.9109	31.702	32.2496	32.1096	32.1865	31.7819	32.0211	31.863	32.7828	31.9332
2340	Q8R5H1	Q8R5H1	Ubiquitin carboxyl-terminal hydrolase 15	Usp15	112.32	7.23601	9		0.196231	0.876286	0.262944	28.09	27.1962	1	4	26.7009	25.5999	27.7375	28.09	27.5556	28.2138	27.5679	27.3133	27.5149	26.3888
2343	Q8VBT0	Q8VBT0	Thioredoxin-related transmembrane protein 1	Tmx1	31.395	8.4015	4		1.17051	0.208231	-1.15304	28.6921	28.5945	5	1	28.3458	28.812	28.0516	29.1712	29.0797	27.7357	26.4917	28.6112	26.262	28.5945
2345	Q8VBV7	Q8VBV7	COP9 signalosome complex subunit 8	Cops8	23.255	8.23183	3	+	4.65139	0.0008	2.117	NaN	28.2603	0	4	26.6787	25.933	26.0767	25.3926	26.4017	28.1684	28.0312	28.2578	28.5839	28.0264
2346	Q8VBW6	Q8VBW6	NEDD8-activating enzyme E1 regulatory subunit	Nae1	60.273	7.85679	5		1.55742	0.126897	-1.15896	28.0449	28.0155	5	1	28.2289	27.7881	27.8171	27.989	28.4013	26.8502	27.6002	26.0871	25.8766	28.0155
2348	Q8VC30	Q8VC30	Bifunctional ATP-dependent dihydroxyacetone kinase/FAD-AMP lyase (cyclizing);ATP-dependent dihydroxyacetone kinase;FAD-AMP lyase (cyclizing)	Dak	59.69	7.57612	6		0.254502	0.821768	0.353734	26.9269	28.8648	5	1	27.0034	27.5159	26.0731	27.76	26.2823	27.2875	26.1549	27.5825	26.5137	28.8648
2350	Q8VC70	Q8VC70	RNA-binding motif, single-stranded-interacting protein 2	Rbms2	40.724	8.41226	5		0.889932	0.461491	0.533753	28.4359	28.9697	5	5	28.5469	28.3629	29.363	28.1322	27.7746	28.8369	28.8696	28.6884	29.6399	28.8136
2352	Q8VCH8	Q8VCH8	UBX domain-containing protein 4	Ubxn4	56.471	8.07022	5		0.0609921	0.96904	-0.0743973	27.9358	27.8614	5	5	28.7993	28.5301	28.0282	26.7965	27.5246	27.8985	27.1743	27.4328	28.4334	28.3678
2354	Q8VCM7	Q8VCM7	Fibrinogen gamma chain	Fgg	49.391	9.39513	22		1.10129	0.431958	-0.469346	33.0337	32.5643	5	5	33.6281	32.8956	32.4098	33.1801	33.0548	32.9118	32.7827	32.4063	32.4822	32.2387
2355	Q8VCM8	Q8VCM8	Nicalin	Ncln	62.907	7.67838	4		0.133503	0.905274	-0.210933	26.8197	26.4822	5	4	27.5698	27.6298	26.6703	26.5882	25.6403	28.0202	25.1306	27.115	26.2353	26.5426
2357	Q8VCN9	Q8VCN9	Tubulin-specific chaperone C	Tbcc	38.124	7.89437	3	+	3.24286	0.00538462	-1.90806	27.9703	NaN	5	0	28.6608	28.4413	28.17	27.2483	27.3311	26.476	25.5484	25.8507	25.896	26.5401
2359	Q8VCW8	Q8VCW8	Acyl-CoA synthetase family member 2, mitochondrial	Acsf2	67.95	8.50717	14		0.0951653	0.971996	-0.0339001	30.0146	29.9807	5	5	30.1691	30.1871	29.7483	30.0137	29.9549	29.7551	30.2433	30.0634	30.1263	29.7154
2360	Q8VD04	Q8VD04	GRIP1-associated protein 1	Gripap1	92.714	7.40494	3	+	2.97717	0.0100541	1.75098	NaN	28.4085	0	5	26.959	26.2048	26.6743	27.4764	25.973	29.0558	28.4216	28.672	28.1733	27.7198
2361	Q8VD62	Q8VD62	UPF0696 protein C11orf68 homolog	Bles03	31.845	8.42584	7		1.6759	0.210582	0.67586	28.8299	29.5058	5	5	28.5805	29.0921	29.4486	28.5045	28.5238	29.6072	29.2471	29.1611	29.957	29.5564
2362	Q8VD75	Q8VD75	Huntingtin-interacting protein 1	Hip1	115.2	7.88288	16		0.20804	0.879895	-0.216788	29.1012	28.8844	5	5	30.0349	29.8881	28.9871	28.4273	28.1686	28.9431	28.5544	28.373	29.358	29.1937
2363	Q8VDC1	Q8VDC1	FYVE and coiled-coil domain-containing protein 1	Fyco1	162.33	8.20978	2		1.24282	0.110324	2.88223	31.0614	31.0504	1	4	26.959	25.9607	31.0614	25.7374	27.0198	30.693	26.9479	32.0085	31.2243	30.2758
2364	Q8VDD5	Q8VDD5	Myosin-9	Myh9	226.37	9.79029	155		0.297662	0.895054	-0.114019	36.2808	36.1668	5	5	36.302	36.4748	36.3754	35.8996	36.3524	36.5669	36.0077	35.7936	36.2335	36.2322
2367	Q8VDG3	Q8VDG3	Poly(A)-specific ribonuclease PARN	Parn	71.558	8.53119	11		0.835903	0.573766	-0.350227	30.3719	30.0217	5	5	30.5886	30.4551	30.3506	30.4967	29.9684	29.9864	30.658	29.6519	29.6383	30.1737
2368	Q8VDJ3	Q8VDJ3	Vigilin	Hdlbp	141.74	9.79835	86		0.0107667	0.995209	0.00366821	35.6732	35.6769	5	5	35.5412	35.4944	35.9861	35.4888	35.8555	35.5975	35.7785	35.8238	35.6182	35.5664
2369	Q8VDL4	Q8VDL4	ADP-dependent glucokinase	Adpgk	53.902	8.56246	9		0.643747	0.563994	-0.490368	29.6335	29.1431	5	5	29.8003	30.027	29.3234	29.0482	29.9686	29.8703	29.3015	28.9252	28.0181	29.6006
2370	Q8VDM4	Q8VDM4	26S proteasome non-ATPase regulatory subunit 2	Psmd2	100.2	9.17598	36		0.29931	0.890603	-0.117653	33.1308	33.0131	5	5	33.1245	33.2559	33.2654	32.9024	33.1058	33.2637	32.8098	32.6043	32.9324	33.4555
2371	Q8VDM6	Q8VDM6	Heterogeneous nuclear ribonucleoprotein U-like protein 1	Hnrnpul1	96.001	8.13659	8		0.47095	0.760745	0.253679	28.9887	29.2424	5	5	28.3903	28.9523	28.9848	28.8788	29.7373	28.8533	29.413	29.099	29.2789	29.5677
2372	Q8VDN2;Q6PIC6;Q9WV27;Q64436	Q8VDN2	Sodium/potassium-transporting ATPase subunit alpha-1	Atp1a1	112.98	8.9695	25		0.179339	0.897296	-0.184075	32.2517	32.0676	5	5	32.5636	32.8621	32.1819	31.4583	32.1925	32.9258	31.4685	31.1816	32.1584	32.6036
2373	Q8VDP3	Q8VDP3	Protein-methionine sulfoxide oxidase MICAL1	Mical1	116.78	7.57891	6		0.223556	0.864997	-0.267783	27.6002	26.8357	4	4	28.2431	26.2026	26.9765	26.7636	28.4174	27.9214	26.7201	26.7577	27.0656	26.7995
2374	Q8VDP4	Q8VDP4	Cell cycle and apoptosis regulator protein 2	Ccar2	103	8.50719	21		0.0367823	0.990142	0.0146248	31.0044	31.019	5	5	30.5868	31.0012	31.2418	31.0254	31.1668	30.8506	31.2986	30.875	31.0126	31.0583
2378	Q8VDW0	Q8VDW0	ATP-dependent RNA helicase DDX39A	Ddx39a	49.067	8.61106	24		0.117909	0.958338	0.0523273	29.7983	29.8506	5	5	29.6513	29.9021	30.028	29.6366	29.7733	30.0505	29.4941	29.5399	30.2766	29.8918
2380	Q8VE37	Q8VE37	Regulator of chromosome condensation	Rcc1	44.93	8.12222	6		0.08222	0.949373	-0.12771	27.811	27.6833	5	5	27.7844	27.8749	26.1268	27.823	29.4457	27.8423	27.7385	27.7365	26.8955	28.2035
2382	Q8VE47	Q8VE47	Ubiquitin-like modifier-activating enzyme 5	Uba5	44.789	8.89904	13		0.0922452	0.967972	-0.0435867	30.6783	30.6347	5	5	30.7202	30.7656	30.9227	30.7087	30.2744	30.7806	30.3028	30.3328	31.0042	30.7533
2383	Q8VE62	Q8VE62	Polyadenylate-binding protein-interacting protein 1	Paip1	45.701	8.26228	2		0.23107	0.863544	0.246625	28.2834	28.7594	5	4	29.0755	28.7589	28.1503	28.2365	27.1955	28.4314	29.0357	28.2792	29.2914	27.6122
2384	Q8VE73	Q8VE73	Cullin-7	Cul7	192.29	8.10735	19		0.585801	0.793107	-0.168318	30.4449	30.2766	5	5	30.2899	30.8566	30.5941	30.1521	30.3317	30.2931	30.1615	30.1216	30.3841	30.4225
2385	Q8VE80	Q8VE80	THO complex subunit 3	Thoc3	38.737	8.80096	11		0.408389	0.784594	0.244253	30.2409	30.4852	5	5	29.7059	29.7504	30.5162	30.7888	30.4431	30.3247	30.4867	30.8469	30.7881	29.9794
2386	Q8VE88	Q8VE88	Protein FAM114A2	Fam114a2	54.044	8.51589	14		0.223196	0.913866	-0.0857384	30.2164	30.1306	5	5	30.59	29.9761	30.0785	30.4813	29.956	30.0492	30.3672	30.2794	29.9399	30.0174
2387	Q8VE97	Q8VE97	Serine/arginine-rich splicing factor 4	Srsf4	55.979	8.15987	8		0.28786	0.785204	0.43968	28.0374	28.4041	3	4	26.1991	27.6976	28.0448	28.3697	27.0892	25.9823	27.9567	28.0481	28.638	28.9737
2388	Q8VED9	Q8VED9	Galectin-related protein	Lgalsl	18.955	8.52423	5		0.669345	0.47752	0.752971	28.1596	29.3762	5	4	27.9373	27.9964	29.1613	28.0769	27.6259	28.734	29.5565	29.5635	29.6509	27.0579
2389	Q8VEE1	Q8VEE1	LIM and cysteine-rich domains protein 1	Lmcd1	40.996	9.01961	20		0.987001	0.592282	0.27997	31.4661	31.7461	5	5	31.9645	31.452	31.3993	31.4424	31.0723	31.842	31.779	31.673	31.8545	31.582
2390	Q8VEE4	Q8VEE4	Replication protein A 70 kDa DNA-binding subunit;Replication protein A 70 kDa DNA-binding subunit, N-terminally processed	Rpa1	69.036	8.74656	18		0.518456	0.801877	0.17143	30.9277	31.0991	5	5	30.673	30.5942	31.0489	31.1135	31.2089	30.7756	31.3358	31.2275	31.0407	31.116
2393	Q8VEH8	Q8VEH8	Endoplasmic reticulum lectin 1	Erlec1	54.906	8.59262	15		0.152229	0.915933	0.113241	30.2819	30.3951	5	5	29.9012	29.6302	30.9521	30.7671	30.1586	30.3591	30.594	30.6481	30.5008	29.8735
2394	Q8VEJ9	Q8VEJ9	Vacuolar protein sorting-associated protein 4A	Vps4a	48.906	7.7789	11		0.885592	0.353685	0.91682	27.7939	27.898	2	4	26.5732	26.0586	28.2424	27.3454	25.7111	27.0433	28.1421	28.2655	28.1411	26.9227
2395	Q8VEK3;REV__Q80W93	Q8VEK3	Heterogeneous nuclear ribonucleoprotein U	Hnrnpu	87.917	10.0154	57		0.399385	0.850093	-0.152111	35.5452	35.3931	5	5	35.4358	35.7492	35.3752	35.2747	35.8913	35.2318	35.015	35.4094	35.6746	35.6347
2396	Q8VEM8	Q8VEM8	Phosphate carrier protein, mitochondrial	Slc25a3	39.632	8.94032	11		0.199138	0.874383	-0.26395	30.7828	30.5189	5	5	31.2984	31.0707	31.2667	29.7205	30.5578	32.0634	29.7497	29.7124	30.1885	30.8804
2397	Q8VH51	Q8VH51	RNA-binding protein 39	Rbm39	59.406	8.72427	18		0.329589	0.888301	-0.114759	30.6674	30.5527	5	5	30.6274	30.807	30.9076	30.4583	30.5369	30.1923	30.3455	30.8379	30.7951	30.5925
2399	Q8VHE0	Q8VHE0	Translocation protein SEC63 homolog	Sec63	87.869	7.93932	6		0.810041	0.431853	-0.725048	28.1169	28.2879	5	2	28.3264	28.5549	27.8281	27.5203	28.3549	28.8715	27.0251	26.8942	26.4644	27.7042
2400	Q8VHI3	Q8VHI3	GDP-fucose protein O-fucosyltransferase 2	Pofut2	49.429	9.41404	19		0.332199	0.876069	-0.132598	33.0752	32.9426	5	5	32.6011	32.9315	33.1593	33.4422	33.242	32.6292	32.8795	32.9773	33.2173	33.0097
2402	Q8VHL1	Q8VHL1	Histone-lysine N-methyltransferase SETD7	Setd7	40.506	8.30799	4		0.199012	0.898255	-0.160672	28.7898	28.6291	5	5	28.8542	28.383	28.9444	29.3007	28.4667	27.7463	28.8373	29.0984	29.2141	28.2495
2404	Q8VHR5	Q8VHR5	Transcriptional repressor p66-beta	Gatad2b	65.41	8.27245	8		1.348	0.310823	0.5875	29.1765	29.764	5	5	28.8272	29.1599	29.9995	29.0486	28.8471	29.7228	29.814	30.1443	29.7623	29.3764
2405	Q8VHX6	Q8VHX6	Filamin-C	Flnc	291.12	9.04567	102		0.13549	0.915373	0.133807	34.0359	34.1697	5	5	34.834	34.5996	33.3825	33.8536	33.5098	34.7479	33.9552	33.4198	34.1006	34.6251
2406	Q8VHY0	Q8VHY0	Chondroitin sulfate proteoglycan 4	Cspg4	252.31	9.30464	74		0.849762	0.566921	-0.353926	34.3397	33.9858	5	5	34.5479	34.5566	34.1529	34.2185	34.2227	34.2747	33.7466	33.4102	33.9517	34.546
2407	Q8VI36	Q8VI36	Paxillin	Pxn	64.476	8.64365	14		0.479498	0.755823	0.25465	30.5978	30.8525	5	5	30.552	30.2987	30.4933	30.985	30.6601	30.5728	31.1963	31.4499	30.826	30.2173
2409	Q8VI75	Q8VI75	Importin-4	Ipo4	119.27	8.20575	15		0.912028	0.432933	-0.583938	29.9399	29.3559	5	5	30.1701	30.3611	30.3808	29.1207	29.6666	30.1501	29.413	29.1723	28.6863	29.3579
2410	Q8VIJ6	Q8VIJ6	Splicing factor, proline- and glutamine-rich	Sfpq	75.441	9.40987	41		0.280837	0.868596	0.174419	33.0635	33.238	5	5	33.3091	33.2253	33.439	32.2872	33.0572	33.432	32.9202	33.0991	33.7857	32.9529
2412	Q91UZ5	Q91UZ5	Inositol monophosphatase 2	Impa2	31.716	8.52256	7		0.103615	0.949029	-0.0776127	28.9222	28.8446	5	5	29.2933	29.3259	29.1029	28.59	28.2989	28.5469	28.4411	28.6421	29.3992	29.1936
2413	Q91V12	Q91V12	Cytosolic acyl coenzyme A thioester hydrolase	Acot7	42.536	8.96435	11		1.58815	0.250198	-0.614962	31.543	30.928	5	5	31.3554	31.3753	31.366	31.7658	31.8523	30.6986	31.3898	31.1635	30.2796	31.1084
2414	Q91V41	Q91V41	Ras-related protein Rab-14	Rab14	23.897	8.93308	13		0.244909	0.901375	0.115736	30.5499	30.6656	5	5	30.8457	30.831	30.6953	29.9212	30.4563	30.9248	30.5921	30.4416	30.5358	30.8338
2415	Q91V61	Q91V61	Sideroflexin-3	Sfxn3	35.406	8.21413	9		0.497646	0.760979	-0.240164	28.6234	28.3832	5	5	28.7537	28.9133	28.5406	28.309	28.6004	28.1504	28.4548	28.0479	28.1243	29.1388
2416	Q91V64	Q91V64	Isochorismatase domain-containing protein 1	Isoc1	32.032	8.33506	6		1.52545	0.113769	-1.32117	28.9415	28.7238	5	2	28.9084	28.6962	28.9515	28.8698	29.2813	27.11	27.3233	26.2206	28.5081	28.9394
2417	Q91V76	Q91V76	Ester hydrolase C11orf54 homolog		34.995	8.47612	8		0.161957	0.910488	0.131996	29.3397	29.4717	5	5	28.8743	29.1802	29.284	29.838	29.522	28.81	29.6385	30.3044	29.6741	28.9313
2418	Q91V92	Q91V92	ATP-citrate synthase	Acly	119.73	9.08368	43		0.287148	0.832971	-0.243632	33.0909	32.8473	5	5	33.3472	33.4559	33.2633	32.0393	33.3488	32.9025	32.2746	32.3555	33.1384	33.5654
2419	Q91VA6	Q91VA6	Polymerase delta-interacting protein 2	Poldip2	41.87	8.26489	10	+	2.23079	0.0196226	-2.25137	29.4906	29.4335	5	1	28.9113	29.4951	29.2526	30.0123	29.7816	26.5029	29.4335	26.3445	27.3202	26.5948
2420	Q91VC3	Q91VC3	Eukaryotic initiation factor 4A-III;Eukaryotic initiation factor 4A-III, N-terminally processed	Eif4a3	46.839	9.40492	32		0.0159569	0.992957	-0.0118301	32.8019	32.79	5	5	32.2739	32.3249	33.1141	32.9122	33.3842	32.4402	33.1155	33.0292	32.5781	32.7873
2422	Q91VD9	Q91VD9	NADH-ubiquinone oxidoreductase 75 kDa subunit, mitochondrial	Ndufs1	79.776	9.11866	28		0.570829	0.785809	0.18028	32.6875	32.8678	5	5	32.836	32.403	32.363	33.0507	32.785	32.6845	32.9338	32.9452	33.0688	32.7068
2424	Q91VH2	Q91VH2	Sorting nexin-9	Snx9	66.545	8.32715	11		0.827665	0.476388	0.514357	29.1529	29.6673	5	5	28.6848	28.7781	29.2801	29.7277	29.2938	29.226	30.2618	30.2528	29.5994	28.9961
2425	Q91VH6	Q91VH6	Protein MEMO1	Memo1	33.692	8.72028	10		0.181349	0.923989	0.0773319	29.9978	30.0751	5	5	29.7911	29.9527	30.1663	30.0785	30.0005	29.7931	29.9121	30.3576	30.537	29.7759
2426	Q91VI7	Q91VI7	Ribonuclease inhibitor	Rnh1	49.816	9.18537	23		0.159513	0.911812	0.121141	32.2508	32.3719	5	5	31.6836	31.7699	32.4187	32.6919	32.6898	32.0003	32.4708	32.7589	32.8016	31.8281
2427	Q91VJ2	Q91VJ2	Protein kinase C delta-binding protein	Prkcdbp	27.853	8.60808	8	+	1.98982	0.0405854	1.69208	28.1194	29.8115	5	5	28.5814	28.0093	29.2401	27.5092	27.2568	29.3709	30.1892	30.3565	30.5154	28.6253
2430	Q91VM5;Q9WV02	Q91VM5;Q9WV02	RNA binding motif protein, X-linked-like-1;RNA-binding motif protein, X chromosome;RNA-binding motif protein, X chromosome, N-terminally processed	Rbmxl1;Rbmx	42.161	8.0167	6		0.184521	0.901364	0.156155	28.2299	28.6495	5	4	27.5896	28.1246	28.6789	28.1322	28.6244	28.8169	28.5498	28.7428	27.3322	28.4887
2431	Q91VM9	Q91VM9	Inorganic pyrophosphatase 2, mitochondrial	Ppa2	38.114	8.18199	3		0.587407	0.630668	0.398286	28.3128	28.7111	5	5	27.9906	28.2501	28.7372	28.6316	27.9548	28.5791	29.3911	29.2033	28.6179	27.7642
2433	Q91VR2	Q91VR2	ATP synthase subunit gamma, mitochondrial	Atp5c1	32.886	9.37722	18		0.824806	0.596571	0.312805	31.6497	31.9625	5	5	31.4926	31.8971	31.827	31.3629	31.6688	31.9263	31.595	32.2191	32.4588	31.6131
2434	Q91VR5	Q91VR5	ATP-dependent RNA helicase DDX1	Ddx1	82.499	9.60332	48		0.379158	0.882017	-0.109462	34.2903	34.1809	5	5	34.2538	34.1428	34.1926	34.5557	34.3067	33.9416	34.2934	34.3561	33.9086	34.4047
2436	Q91VU7	Q91VU7		Pus7	74.792	7.7021	7		0.93252	0.334045	-0.922927	28.0029	NaN	4	0	27.6736	27.5831	28.8581	25.8394	27.8969	27.1337	26.7052	26.4485	26.9226	26.0265
2437	Q91VW5	Q91VW5	Golgin subfamily A member 4	Golga4	257.56	7.56881	13		0.779847	0.561081	0.396476	28.9302	29.3267	5	5	29.0299	29.1507	29.2448	28.7306	28.495	29.116	30.1011	29.2604	29.3899	28.766
2438	Q91VZ6	Q91VZ6	Stromal membrane-associated protein 1	Smap1	47.66	8.3609	3		0.0210115	0.990114	-0.0392448	27.7377	28.0758	5	4	27.9047	28.1349	29.3665	26.8059	26.4767	28.2634	28.1887	27.8513	26.1892	27.9998
2441	Q91W39	Q91W39	Nuclear receptor coactivator 5	Ncoa5	65.318	8.48127	9		0.936693	0.689622	-0.214352	29.9345	29.7201	5	5	29.8816	29.783	30.0921	30.101	29.8147	29.3307	29.8572	29.8636	29.8278	29.7213
2442	Q91W50	Q91W50	Cold shock domain-containing protein E1	Csde1	88.79	8.90173	34		0.610643	0.787381	-0.171373	32.2491	32.0777	5	5	32.2834	32.1536	32.2	32.6514	31.9571	32.1096	31.9215	31.9433	32.3422	32.0721
2444	Q91W90	Q91W90	Thioredoxin domain-containing protein 5	Txndc5	46.415	9.60789	27		0.038017	0.98379	0.0444672	33.3259	33.3703	5	5	32.4455	32.931	33.327	34.0224	33.9034	32.4343	33.008	33.7703	33.9456	33.6934
2446	Q91WC0	Q91WC0	Histone-lysine N-methyltransferase setd3	Setd3	67.175	7.51339	5		0.474078	0.692336	0.377213	27.2565	27.1613	3	4	27.5527	26.4682	27.2635	26.9534	26.7663	26.8689	27.2106	27.9688	28.245	26.5969
2447	Q91WD5	Q91WD5	NADH dehydrogenase [ubiquinone] iron-sulfur protein 2, mitochondrial	Ndufs2	52.625	8.59688	9		1.13376	0.471799	0.399892	30.1228	30.5227	5	5	29.8697	30.1257	30.0627	30.3537	30.2023	30.9004	30.4317	30.1199	30.9727	30.1888
2449	Q91WG4	Q91WG4	Elongator complex protein 2	Elp2	93.092	8.4712	21		0.00516156	0.994871	0.00355377	30.5735	30.5771	5	5	29.9862	30.2305	30.8149	30.7641	31.0718	30.3833	30.5704	30.6749	30.9633	30.2934
2450	Q91WG8	Q91WG8	Bifunctional UDP-N-acetylglucosamine 2-epimerase/N-acetylmannosamine kinase;UDP-N-acetylglucosamine 2-epimerase (hydrolyzing);N-acetylmannosamine kinase	Gne	79.198	8.28863	12		0.40773	0.783274	0.246782	29.5646	29.8114	5	5	29.6784	29.9932	29.7496	28.8591	29.5427	29.9631	29.3559	29.3883	29.9758	30.3737
2451	Q91WJ7	Q91WJ7	SPATS2-like protein	Spats2l	61.668	8.2223	9		0.309345	0.865613	0.163321	29.1423	29.3057	5	5	29.2252	29.2999	29.4645	28.6123	29.1098	29.0185	28.8003	29.7328	29.3955	29.5811
2452	Q91WJ8	Q91WJ8	Far upstream element-binding protein 1	Fubp1	68.539	8.37451	15		1.09986	0.296246	0.799499	29.4616	30.2611	5	5	29.4822	28.9816	30.1319	29.1042	29.6079	29.699	30.7539	30.8297	30.8277	29.195
2454	Q91WK2	Q91WK2	Eukaryotic translation initiation factor 3 subunit H	Eif3h	39.832	9.12882	17		0.324872	0.841736	-0.194536	31.8228	31.6283	5	5	31.5591	31.2285	31.7768	32.4543	32.0952	31.179	31.6965	31.9054	31.9541	31.4063
2456	Q91WM3	Q91WM3	U3 small nucleolar RNA-interacting protein 2	Rrp9	52.106	7.89366	5		0.853945	0.478242	-0.504803	27.902	27.787	5	3	28.2198	28.4527	27.4295	27.7464	27.6616	27.8491	27.71	26.9526	27.8021	26.6722
2457	Q91WN1	Q91WN1	DnaJ homolog subfamily C member 9	Dnajc9	30.059	7.73965	3		1.65365	0.149006	0.911202	NaN	27.58	0	4	26.7865	25.7419	27.2689	26.5536	26.5847	27.1342	27.3439	27.5783	28.2637	27.1714
2459	Q91WQ3	Q91WQ3	Tyrosine--tRNA ligase, cytoplasmic;Tyrosine--tRNA ligase, cytoplasmic, N-terminally processed	Yars	59.105	9.15891	30		0.307327	0.863308	0.174234	32.765	32.9393	5	5	32.3624	32.3761	32.7256	33.2736	33.0873	32.3716	33.102	33.166	33.2309	32.8258
2461	Q91WU5	Q91WU5	Arsenite methyltransferase	As3mt	41.793	8.98036	10		0.553815	0.588946	0.515098	31.5202	32.0353	5	5	30.7876	30.9879	31.5682	32.4309	31.8263	32.221	32.6665	32.6927	31.6477	30.9487
2462	Q91X20	Q91X20	Set1/Ash2 histone methyltransferase complex subunit ASH2	Ash2l	68.249	8.2244	7		0.443423	0.792672	-0.210451	29.4523	29.2418	5	5	29.1573	29.08	29.5404	29.7217	29.762	28.8802	29.2959	29.52	29.6609	28.8521
2465	Q91X78	Q91X78	Erlin-1	Erlin1	39.182	7.86776	6	+	2.71083	0.0101538	2.09632	NaN	28.8324	0	4	26.842	26.3428	27.254	25.9442	25.7396	28.6691	28.6079	27.2745	29.5904	28.4624
2466	Q91XB7	Q91XB7	Protein YIF1A	Yif1a	32.134	8.38014	2		0.417168	0.691996	0.459916	28.083	28.0809	4	4	25.8117	28.335	28.1547	27.704	28.1383	28.666	28.0428	28.1196	27.5607	28.0541
2467	Q91XD6	Q91XD6	Vacuolar protein-sorting-associated protein 36	Vps36	43.735	7.80973	4		0.589322	0.553386	0.606494	27.9256	28.2745	3	4	26.1312	27.1526	27.7773	28.0864	27.9132	27.7244	28.9211	28.654	27.7986	26.9951
2471	Q91XL9	Q91XL9	Oxysterol-binding protein-related protein 1	Osbpl1a	107.79	7.53644	7		0.383625	0.768244	0.299997	27.494	27.794	5	5	27.3926	26.5865	28.2054	27.5227	27.7627	27.1694	27.6693	27.5198	28.3275	28.2839
2472	Q91XU0	Q91XU0	ATPase WRNIP1	Wrnip1	71.793	8.18713	10		0.195174	0.903705	0.113318	29.0785	29.1918	5	5	28.8462	28.7682	29.1072	29.6322	29.0386	28.7546	29.1488	29.6783	28.8842	29.493
2473	Q91XV3	Q91XV3	Brain acid soluble protein 1	Basp1	22.086	8.30827	5		0.788798	0.378611	1.02661	27.3362	28.3628	5	5	25.994	26.9024	28.7317	28.2021	26.851	28.8444	29.448	28.8894	27.0792	27.5533
2474	Q91YD3	Q91YD3	mRNA-decapping enzyme 1A	Dcp1a	65.218	6.8931	2		0.00386994	0.995501	-0.00739059	24.245	24.5951	4	5	23.9382	23.8107	25.3954	26.0325	23.8358	23.8241	24.0228	24.4162	26.3206	24.3919
2477	Q91YE6	Q91YE6	Importin-9	Ipo9	116.05	7.70871	5	+	3.76393	0.00608696	-1.5756	27.7139	NaN	5	0	27.8904	27.7683	28.0114	27.357	27.5422	26.1184	26.5799	26.5755	25.474	25.9434
2480	Q91YH5;Q8BH66	Q91YH5	Atlastin-3	Atl3	60.574	8.30257	6		0.358574	0.74101	-0.436404	29.1595	28.7231	5	5	29.8242	29.7491	29.3083	28.028	28.8879	29.9751	27.7566	28.5954	27.93	29.3583
2482	Q91YI4	Q91YI4	Beta-arrestin-2	Arrb2	46.313	9.58374	1		0.279698	0.762035	-0.713698	32.8624	33.2032	5	4	32.6774	32.9568	33.3494	32.3598	32.9685	33.3134	33.1682	32.7894	33.5419	27.9305
2483	Q91YJ2	Q91YJ2	Sorting nexin-4	Snx4	51.777	8.49674	11		0.796893	0.591979	0.326058	29.9569	30.2829	5	5	29.9723	29.882	29.8894	29.9661	30.0746	29.7572	30.5004	30.5405	30.7925	29.8241
2484	Q91YJ3	Q91YJ3	Thymocyte nuclear protein 1	Thyn1	26.178	7.78925	3		0.458501	0.649471	0.546906	27.3063	27.3226	3	4	26.6453	26.854	28.4197	27.2054	25.2233	27.0088	27.7916	27.0736	27.9547	27.2535
2486	Q91YN5	Q91YN5	UDP-N-acetylhexosamine pyrophosphorylase;UDP-N-acetylgalactosamine pyrophosphorylase;UDP-N-acetylglucosamine pyrophosphorylase	Uap1	58.608	8.94601	19		0.204185	0.912146	-0.0945507	31.7647	31.6701	5	5	31.4982	31.6188	31.6261	31.9929	32.0875	31.7293	31.2297	31.485	32.0797	31.827
2488	Q91YQ5	Q91YQ5	Dolichyl-diphosphooligosaccharide--protein glycosyltransferase subunit 1	Rpn1	68.527	9.80073	44		0.271337	0.904203	-0.089769	34.7847	34.695	5	5	34.6805	35.0444	34.7518	34.5703	34.8766	34.9192	34.5602	34.4264	34.5677	35.0012
2489	Q91YR1	Q91YR1	Twinfilin-1	Twf1	40.079	9.08682	18		0.122053	0.959755	-0.0430458	31.5975	31.5545	5	5	31.3948	31.4549	31.5858	31.8866	31.6654	31.2409	31.6051	31.702	31.8074	31.4168
2490	Q91YR5	Q91YR5	Methyltransferase-like protein 13	Mettl13	78.756	7.84512	6		0.383786	0.706257	-0.493173	28.2429	28.6258	5	3	28.3016	28.6993	28.3393	27.7391	28.1352	28.9493	26.6793	26.1918	28.5426	28.3856
2491	Q91YR7	Q91YR7	Pre-mRNA-processing factor 6	Prpf6	106.72	8.34171	20		0.138732	0.910139	0.155029	30.2575	30.4125	5	5	30.5481	31.057	30.6155	29.5585	29.5081	31.4993	30.3178	29.6895	30.3564	30.1995
2492	Q91YR9	Q91YR9	Prostaglandin reductase 1	Ptgr1	35.56	7.91977	5		0.144701	0.918135	0.106383	27.735	27.6277	3	5	26.7753	27.626	27.5266	28.1972	27.4812	27.8736	27.961	27.3503	27.1024	27.8511
2493	Q91YS8;Q8BW96	Q91YS8;Q8BW96	Calcium/calmodulin-dependent protein kinase type 1;Calcium/calmodulin-dependent protein kinase type 1D	Camk1;Camk1d	41.624	8.26745	4		0.0217414	0.991291	-0.0440456	28.539	28.4784	4	4	28.6913	28.5996	28.5055	26.2952	28.3594	29.3747	27.5631	28.1321	26.3171	28.8439
2494	Q91YT0	Q91YT0	NADH dehydrogenase [ubiquinone] flavoprotein 1, mitochondrial	Ndufv1	50.834	9.16581	16		0.0125428	0.995443	-0.00374298	31.8625	31.8587	5	5	32.1834	31.8632	31.8553	31.62	31.7904	31.8246	31.7694	31.7862	31.9016	32.0118
2495	Q91YT7	Q91YT7	YTH domain-containing family protein 2	Ythdf2	62.279	8.67374	8		0.518969	0.773594	0.208761	30.1149	30.3236	5	5	29.8546	29.8385	30.3509	30.0022	30.5281	30.3908	29.922	30.4675	30.6742	30.1636
2497	Q91YW3	Q91YW3	DnaJ homolog subfamily C member 3	Dnajc3	57.463	8.85175	14		1.8393	0.207918	0.614579	30.7267	31.3413	5	5	30.6687	30.8197	31.1017	30.4599	30.5833	31.3833	31.3594	31.4423	31.7667	30.7546
2499	Q91Z53	Q91Z53	Glyoxylate reductase/hydroxypyruvate reductase	Grhpr	35.328	8.95835	8		0.678139	0.771128	0.184045	30.4843	30.6684	5	5	30.4613	30.4953	30.5886	30.5325	30.3438	30.4951	30.7001	30.9295	30.9435	30.2736
2500	Q91Z67	Q91Z67	SLIT-ROBO Rho GTPase-activating protein 2	Srgap2	120.8	7.96069	8		0.213607	0.904007	-0.110151	29.0638	28.9537	5	5	28.554	29.0192	29.4462	28.8869	29.4127	28.9933	28.566	28.8039	29.2715	29.1336
2501	Q91Z83	Q91Z83	Myosin-7	Myh7	222.88	9.21434	130		0.519959	0.634027	0.471404	33.8027	34.2741	5	5	34.696	34.556	33.1261	33.4927	33.1425	34.9865	33.782	33.6867	34.1983	34.7171
2504	Q91ZJ5	Q91ZJ5	UTP--glucose-1-phosphate uridylyltransferase	Ugp2	56.979	9.71789	32		0.282148	0.886929	0.126592	34.1027	34.2293	5	5	33.9677	33.8078	33.9327	34.4475	34.3581	33.795	34.4378	34.5239	34.3903	33.9997
2506	Q91ZR2	Q91ZR2	Sorting nexin-18	Snx18	67.903	9.04673	15		0.0584709	0.983796	0.0272152	31.2991	31.3263	5	5	31.4646	31.1866	31.6245	30.8252	31.3946	31.5567	31.4185	31.4222	31.0307	31.2035
2509	Q91ZW2	Q91ZW2	GDP-fucose protein O-fucosyltransferase 1	Pofut1	44.688	8.6225	11		0.405639	0.749516	-0.320967	30.2346	29.9136	5	5	30.5976	30.7545	29.3647	30.0419	30.4142	29.0477	30.0683	30.1887	29.7104	30.5529
2510	Q91ZW3;Q6PGB8	Q91ZW3	SWI/SNF-related matrix-associated actin-dependent regulator of chromatin subfamily A member 5	Smarca5	121.63	8.6587	31		0.0110656	0.994369	0.0119915	31.4051	31.4171	5	5	31.915	32.1208	31.343	30.5171	31.1296	32.1624	30.7737	31.243	31.2609	31.6456
2511	Q91ZX7;Q9JI18;Q3TX51;O88572;Q91VN0	Q91ZX7	Prolow-density lipoprotein receptor-related protein 1;Low-density lipoprotein receptor-related protein 1 85 kDa subunit;Low-density lipoprotein receptor-related protein 1 515 kDa subunit;Low-density lipoprotein receptor-related protein 1 intracellular domain	Lrp1	504.74	8.8453	99		0.822926	0.682395	-0.236084	34.3759	34.1398	5	5	34.3598	34.3074	34.2115	34.5634	34.4374	33.9931	34.3556	33.7017	34.1802	34.4684
2512	Q920A5	Q920A5	Retinoid-inducible serine carboxypeptidase	Scpep1	50.964	8.69558	10		0.35322	0.786643	0.288526	30.2477	30.5362	5	5	29.6905	29.8495	30.2336	31.0085	30.4564	29.7381	30.8202	31.1276	30.9444	30.0509
2513	Q920B9	Q920B9	FACT complex subunit SPT16	Supt16h	119.82	8.82039	32		1.27219	0.474911	-0.347333	32.2397	31.8924	5	5	32.0721	32.2876	32.1246	32.2276	32.4866	32.0603	31.7793	31.4403	31.9462	32.2359
2514	Q920E5	Q920E5	Farnesyl pyrophosphate synthase	Fdps	40.581	9.06759	13		0.511288	0.666882	-0.389517	31.391	31.0015	5	5	31.5358	31.6631	31.8085	30.8102	31.1374	31.6805	30.9451	30.4642	30.2058	31.7118
2519	Q920Q6	Q920Q6	RNA-binding protein Musashi homolog 2	Msi2	36.938	9.17797	10		1.62847	0.208979	0.693867	30.8824	31.5762	5	5	30.8783	30.641	31.1091	30.9794	30.8042	31.1456	31.8067	31.9811	32.0602	30.8875
2520	Q920Q8	Q920Q8	Influenza virus NS1A-binding protein homolog	Ivns1abp	71.58	7.79169	7		0.126122	0.96819	-0.0349426	27.89	27.855	5	5	27.8072	27.6939	27.8766	28.0935	27.9786	27.5654	27.8467	27.9092	27.9086	28.0452
2523	Q921F2	Q921F2	TAR DNA-binding protein 43	Tardbp	44.547	10.0004	26		0.640579	0.724137	0.234866	33.9427	34.1776	5	5	33.6626	33.5473	34.1206	34.457	33.9259	33.9557	34.2374	34.396	34.2396	34.0592
2524	Q921F4	Q921F4	Heterogeneous nuclear ribonucleoprotein L-like	Hnrnpll	64.124	9.26293	24		0.127553	0.940502	-0.0776932	32.667	32.5893	5	5	33.0695	32.7147	32.4905	32.694	32.3664	32.5394	32.2359	32.1195	32.8626	33.1893
2525	Q921G7	Q921G7	Electron transfer flavoprotein-ubiquinone oxidoreductase, mitochondrial	Etfdh	68.09	8.87122	15		0.193772	0.925473	-0.0722824	31.6385	31.5662	5	5	32.0055	31.5572	31.3256	31.761	31.5431	31.218	31.5524	31.5903	31.7268	31.7435
2527	Q921H8;Q8VCH0	Q921H8;Q8VCH0	3-ketoacyl-CoA thiolase A, peroxisomal;3-ketoacyl-CoA thiolase B, peroxisomal	Acaa1a;Acaa1b	43.953	8.69058	9		0.156853	0.921976	-0.0901917	30.2546	30.1644	5	5	30.5523	30.471	30.4328	29.8134	30.0036	30.1599	30.2586	29.5416	30.3019	30.5602
2528	Q921I1;CON__Q29443;CON__Q0IIK2;CON__Q2HJF0;Q9DBD0	Q921I1	Serotransferrin	Tf	76.723	8.91045	26		0.832105	0.589668	0.32007	31.9206	32.2406	5	5	32.1257	31.969	31.4188	32.055	32.0342	32.2936	32.3703	32.7198	31.9155	31.904
2530	Q921J2	Q921J2	GTP-binding protein Rheb	Rheb	20.451	8.7042	4		0.412691	0.774418	-0.258863	29.2683	29.0095	5	5	28.8843	29.0736	29.1151	29.4931	29.7755	29.378	29.2061	29.5488	28.5156	28.3989
2532	Q921M3	Q921M3	Splicing factor 3B subunit 3	Sf3b3	135.55	8.93431	34		0.212023	0.902419	-0.12113	32.4486	32.3275	5	5	32.0571	32.6521	32.6576	32.0992	32.777	32.5406	31.9878	31.8347	32.6529	32.6214
2533	Q921M4	Q921M4	Golgin subfamily A member 2	Golga2	113.28	8.67504	21		2.00218	0.101543	0.955099	30.6603	31.6154	5	5	30.4102	30.7466	31.4648	30.6291	30.0509	31.4961	31.9133	31.6929	31.9267	31.0481
2534	Q921M7;Q8BHZ0	Q921M7	Protein FAM49B	Fam49b	36.776	8.07287	5		0.00721146	0.997299	-0.0120392	27.7675	27.7554	5	5	28.788	28.4687	27.2221	27.145	27.2135	28.7661	26.6181	27.3331	27.2478	28.8121
2536	Q921T2	Q921T2	Torsin-1A-interacting protein 1	Tor1aip1	66.78	8.17038	6		0.0682271	0.981055	0.0299931	29.1417	29.1716	5	5	29.1559	29.4218	29.1791	28.7473	29.2042	29.4982	29.2522	28.788	29.1262	29.1936
2539	Q921X9	Q921X9	Protein disulfide-isomerase A5	Pdia5	59.266	9.45702	33		0.0977014	0.969777	-0.0386307	33.1312	33.0926	5	5	32.8067	32.8522	33.3283	33.4068	33.2621	32.8422	33.1017	33.2366	33.2538	33.0287
2542	Q922B2	Q922B2	Aspartate--tRNA ligase, cytoplasmic	Dars	57.147	9.46532	35		0.202943	0.9365	-0.0589066	33.6766	33.6177	5	5	33.5431	33.4433	33.8491	33.7623	33.7855	33.6995	33.5807	33.2962	33.771	33.7412
2543	Q922D4	Q922D4	Serine/threonine-protein phosphatase 6 regulatory subunit 3	Ppp6r3	94.652	7.4697	3		0.360052	0.802131	-0.232454	27.2964	27.0537	5	4	27.6618	28.015	27.0866	26.7253	26.9931	27.5956	26.8943	26.6338	27.1047	27.0912
2544	Q922D8	Q922D8	C-1-tetrahydrofolate synthase, cytoplasmic;Methylenetetrahydrofolate dehydrogenase;Methenyltetrahydrofolate cyclohydrolase;Formyltetrahydrofolate synthetase;C-1-tetrahydrofolate synthase, cytoplasmic, N-terminally processed	Mthfd1	101.2	9.24667	46		0.384091	0.88141	0.110952	33.3935	33.5045	5	5	33.1566	33.2873	33.4945	33.3346	33.6946	33.1642	33.5237	33.5397	33.6567	33.6381
2545	Q922E4	Q922E4	Ethanolamine-phosphate cytidylyltransferase	Pcyt2	45.234	8.45139	11		0.152812	0.915607	0.110552	29.5647	29.6753	5	5	29.3367	29.4263	29.1989	30.2277	29.634	28.8463	29.7565	30.0827	29.8146	29.8762
2546	Q922F4	Q922F4	Tubulin beta-6 chain	Tubb6	50.09	9.30434	27		0.597843	0.7545	0.212257	32.1162	32.3285	5	5	31.9159	32.1613	31.7405	32.4096	32.354	31.9758	32.3984	32.6382	32.4578	32.1723
2548	Q922H4	Q922H4	Mannose-1-phosphate guanyltransferase alpha	Gmppa	46.244	8.40095	9		0.327766	0.832245	0.213704	29.2215	29.4352	5	5	28.7735	29.1843	29.5791	28.9484	29.6221	29.2802	28.8094	29.4817	30.2128	29.3918
2549	Q922H9	Q922H9	Zinc finger protein 330	Znf330	35.607	7.3216	3		1.1731	0.259362	0.871777	26.2522	NaN	4	0	26.8091	26.0031	25.9415	26.1155	26.0813	28.2921	27.285	25.963	26.7108	27.0585
2552	Q922P9	Q922P9	Putative oxidoreductase GLYR1	Glyr1	59.715	8.30997	13		0.753863	0.655995	-0.269861	29.51	29.2402	5	5	29.783	29.6206	29.2775	29.1545	29.7147	29.2964	28.9416	28.9362	29.4161	29.6105
2553	Q922Q1	Q922Q1	Mitochondrial amidoxime reducing component 2	37316	38.194	8.13922	6		1.16752	0.207574	-1.19366	28.5184	27.3247	5	5	28.8886	28.4311	29.0502	28.0191	28.2029	28.7902	27.2582	26.7451	25.7302	28.1
2554	Q922Q4	Q922Q4	Pyrroline-5-carboxylate reductase 2	Pycr2	33.659	9.27561	20		0.502665	0.785135	0.201735	32.001	32.2027	5	5	31.7388	31.7645	32.2956	32.188	32.0178	31.7268	32.205	32.4675	32.5726	32.0416
2555	Q922Q8	Q922Q8	Leucine-rich repeat-containing protein 59	Lrrc59	34.877	9.35445	15		0.275696	0.819384	0.303472	31.6123	31.9157	5	5	30.9364	32.1405	31.9354	30.7437	32.3054	32.3309	31.4327	30.9788	32.8721	31.9642
2556	Q922Q9	Q922Q9	Chitinase domain-containing protein 1	Chid1	44.905	8.10704	6		0.965702	0.334769	0.861049	28.0232	28.4461	3	4	27.7064	28.1801	28.1832	26.1038	26.8166	28.1114	28.5404	27.5108	28.1479	28.9848
2557	Q922R8	Q922R8	Protein disulfide-isomerase A6	Pdia6	48.1	10.1408	32		0.220419	0.903636	0.118165	34.8508	34.969	5	5	34.4311	34.6653	34.8813	35.2789	34.9976	34.7964	34.9673	35.337	35.2887	34.4556
2559	Q922V4	Q922V4	Pleiotropic regulator 1	Plrg1	56.937	8.16776	6		0.47093	0.802304	0.181267	28.8717	29.0529	5	5	28.8679	28.9799	29.0267	28.665	28.8188	28.7151	29.6399	29.1829	28.9106	28.8162
2560	Q922W5	Q922W5	Pyrroline-5-carboxylate reductase 1, mitochondrial	Pycr1	32.373	9.61425	19		1.53387	0.27064	0.585755	32.679	33.2647	5	5	32.3524	32.4265	33.1582	32.7187	32.7391	32.889	33.1793	33.6566	33.665	32.9338
2563	Q923D2	Q923D2	Flavin reductase (NADPH)	Blvrb	22.197	8.80741	5		0.000290322	0.999297	-0.000310898	29.9118	29.9115	5	5	28.988	29.6565	29.7157	30.6266	30.5721	29.2128	30.2062	30.1407	30.1448	29.8531
2566	Q923G2	Q923G2	DNA-directed RNA polymerases I, II, and III subunit RPABC3	Polr2h	17.143	8.15027	3		0.573805	0.506068	-0.826036	27.6703	NaN	4	0	28.5763	29.1099	26.3751	26.678	26.3171	27.0391	26.4026	25.2756	27.2335	26.9753
2567	Q923T9	Q923T9	Calcium/calmodulin-dependent protein kinase type II subunit gamma	Camk2g	59.606	8.43319	9		1.09987	0.484754	-0.366248	29.8302	29.464	5	5	30.3003	30.145	29.7693	29.5141	29.4225	29.6292	29.3882	29.4835	29.5432	29.2759
2568	Q924C1	Q924C1	Exportin-5	Xpo5	136.97	7.20268	6		0.184174	0.898482	-0.181328	27.2107	27.8919	5	1	27.5275	27.0632	27.7688	26.7304	26.9634	27.8919	25.9237	26.84	27.5781	26.9129
2569	Q924C6	Q924C6	Lysyl oxidase homolog 4	Loxl4	84.778	8.69211	19		0.610318	0.585487	-0.468761	31.3556	30.8869	5	5	32.2398	31.9184	31.1002	30.3813	31.1384	31.3521	30.3312	30.6593	31.1079	30.9839
2570	Q924M7	Q924M7	Mannose-6-phosphate isomerase	Mpi	46.575	7.9735	7	+	1.95503	0.0441379	-1.66146	28.4251	NaN	4	0	26.5281	28.8239	27.6708	28.0941	29.1117	25.7415	26.8162	26.783	26.0172	26.5634
2572	Q925E7	Q925E7	Serine/threonine-protein phosphatase 2A 55 kDa regulatory subunit B delta isoform	Ppp2r2d	51.957	8.05584	11		0.619104	0.475564	0.884428	28.1414	28.8839	2	4	27.4647	26.8658	26.3935	28.0316	28.2512	28.698	29.2024	28.8464	28.7889	25.8935
2573	Q925H1	Q925H1	Zinc finger transcription factor Trps1	Trps1	141.03	8.18498	18		0.0784988	0.986908	0.0194462	30.2623	30.2818	5	5	30.1181	30.2422	30.5427	30.222	30.1867	30.3358	30.4024	30.3472	30.2112	30.1123
2574	Q925I1	Q925I1	ATPase family AAA domain-containing protein 3	Atad3	66.741	8.27882	12		1.72321	0.173394	0.775663	29.1931	29.9688	5	5	28.8777	29.6525	29.6035	28.6585	29.1735	30.1483	30.0402	29.6379	30.5006	29.517
2575	Q925J9	Q925J9	Mediator of RNA polymerase II transcription subunit 1	Med1	167.14	7.18429	4		0.326807	0.832502	-0.214744	27.3132	26.9677	4	5	27.9477	26.6596	27.6322	26.8447	26.8282	27.1332	27.0816	26.6806	27.2791	26.6642
2577	Q93092	Q93092	Transaldolase	Taldo1	37.387	8.71556	10		0.290407	0.834067	0.24307	30.0288	30.2719	5	5	29.2312	29.2382	30.6685	30.3891	30.6172	29.9886	30.0784	30.196	30.7625	30.3339
2578	Q99020	Q99020	Heterogeneous nuclear ribonucleoprotein A/B	Hnrnpab	30.831	8.70944	7		0.0951238	0.94765	-0.0972324	29.6346	29.5373	5	5	29.4078	30.2261	30.5539	28.7435	29.2415	29.7192	29.5578	29.6477	28.8508	29.9111
2581	Q99J09	Q99J09	Methylosome protein 50	Wdr77	36.942	8.93172	8		1.18932	0.322545	-0.655077	30.4534	29.7983	5	5	30.8416	30.7538	29.8752	30.2968	30.4993	29.2733	29.7619	29.8269	29.4124	30.7168
2582	Q99J36	Q99J36	THUMP domain-containing protein 1	Thumpd1	38.884	8.36838	8		0.598913	0.47771	1.00399	29.6756	29.4074	3	5	29.657	29.6801	29.6896	26.3997	26.5907	29.2466	29.6649	29.5002	29.9981	28.6275
2583	Q99J45	Q99J45	Nuclear receptor-binding protein	Nrbp1	59.865	8.44261	8		0.871304	0.397489	-0.758647	29.4765	29.1311	5	4	29.2227	29.3629	29.2021	30.0948	29.5001	28.772	29.2062	29.3909	27.0652	29.1552
2584	Q99J62	Q99J62	Replication factor C subunit 4	Rfc4	39.866	8.33319	11		0.560649	0.700159	0.289454	28.8166	29.106	5	5	28.6023	28.4502	29.3259	28.6978	29.0066	28.7618	28.9856	29.1558	29.818	28.8089
2585	Q99J77	Q99J77		Nans	40.024	9.78417	22		0.0589218	0.978917	0.0404648	33.5999	33.6403	5	5	33.1991	32.9893	33.8029	34.2381	33.7701	33.5166	33.8462	33.9114	33.4597	33.4677
2586	Q99J99	Q99J99	3-mercaptopyruvate sulfurtransferase	Mpst	33.097	8.56714	11		0.635685	0.446894	1.1073	29.4453	29.7559	4	5	28.7448	25.4617	29.4039	29.3014	30.3312	29.348	30.0593	30.2485	29.7166	29.407
2588	Q99JB8	Q99JB8	Protein kinase C and casein kinase II substrate protein 3	Pacsin3	48.584	8.22352	8		1.62864	0.05764	2.17797	29.0874	29.4652	2	5	26.2813	29.7884	25.8299	28.3864	26.1502	29.25	29.8207	29.4149	29.6505	29.1899
2590	Q99JF8	Q99JF8	PC4 and SFRS1-interacting protein	Psip1	59.696	8.54255	12		0.235684	0.867493	0.225674	29.9177	30.1434	5	5	29.7253	30.4767	31.0439	28.9774	29.3654	30.4867	29.849	30.3008	29.9292	30.1513
2591	Q99JI4	Q99JI4	26S proteasome non-ATPase regulatory subunit 6	Psmd6	45.536	9.00911	16		0.482276	0.739249	-0.285565	31.735	31.4494	5	5	31.534	32.0778	31.5656	31.5374	31.9602	31.9672	31.5059	31.0537	30.7309	31.9895
2592	Q99JI6	Q99JI6	Ras-related protein Rap-1b	Rap1b	20.825	9.16926	7		0.288154	0.867511	0.172073	30.7068	30.8789	5	5	30.4664	30.8796	31.1014	30.0839	31.0029	31.4785	30.8061	30.9198	30.4728	30.7173
2593	Q99JR1	Q99JR1	Sideroflexin-1	Sfxn1	35.649	8.53277	6		0.0520453	0.971336	-0.0584011	29.2667	29.2083	5	5	30.0561	29.9851	29.4195	28.0236	28.8494	29.5306	28.9288	28.9996	29.1298	29.4528
2596	Q99JT2;Q9Z2W1	Q99JT2	Serine/threonine-protein kinase 26	Stk26	46.613	9.31996	27		0.0559575	0.980777	-0.0339882	32.6873	32.6533	5	5	32.2878	32.3388	33.0097	33.0982	32.702	32.3111	33.0152	32.7702	32.8214	32.3486
2597	Q99JW4;Q91XD2	Q99JW4	LIM and senescent cell antigen-like-containing domain protein 1	Lims1	37.24	9.33122	24		1.00722	0.586183	0.290089	32.044	32.3341	5	5	32.0107	31.7991	32.2804	32.228	31.9019	32.4101	32.3944	32.6311	31.874	32.3609
2598	Q99JX3	Q99JX3	Golgi reassembly-stacking protein 2	Gorasp2	47.038	9.0984	11		0.0368755	0.981438	-0.0549335	30.8682	30.8133	5	5	31.3146	29.7235	30.3948	31.7515	31.1566	29.6206	30.556	31.9242	30.8282	31.1373
2599	Q99JX4	Q99JX4	Eukaryotic translation initiation factor 3 subunit M	Eif3m	42.516	8.91413	10		0.429894	0.652787	-0.626877	30.6104	29.9835	5	5	31.5252	31.1693	31.3596	29.7323	29.2656	30.8778	28.6826	28.9858	30.6144	30.757
2600	Q99JX7	Q99JX7	Nuclear RNA export factor 1	Nxf1	70.299	8.51314	13		0.117148	0.953347	-0.0599445	30.3115	30.2516	5	5	30.1234	30.4137	30.4939	29.9932	30.5333	30.0599	29.8507	30.2889	30.8115	30.2467
2601	Q99JY0	Q99JY0	Trifunctional enzyme subunit beta, mitochondrial;3-ketoacyl-CoA thiolase	Hadhb	51.386	9.31288	24		0.575962	0.714456	0.264973	32.4488	32.7137	5	5	32.6489	32.6145	32.6858	31.6055	32.6892	32.6895	32.5762	32.7965	32.923	32.5836
2602	Q99JY3	Q99JY3	GTPase IMAP family member 4	Gimap4	38.044	8.07806	5		2.12088	0.0783304	1.00297	27.735	28.5257	4	5	26.6738	28.0522	27.8826	27.6478	27.3575	28.4999	28.8408	28.8588	28.1063	28.323
2604	Q99JY9;Q641P0	Q99JY9	Actin-related protein 3	Actr3	47.357	9.54665	30		0.508845	0.8488	-0.132633	33.2675	33.1349	5	5	33.1233	33.1685	33.101	33.453	33.4918	33.0726	32.9331	33.0383	33.4517	33.1788
2605	Q99K01	Q99K01	Pyridoxal-dependent decarboxylase domain-containing protein 1	Pdxdc1	87.334	9.1543	33		0.241891	0.904737	0.0966034	32.8181	32.9147	5	5	32.5528	32.5697	32.9494	33.0955	32.923	32.9071	32.9292	32.7867	33.3488	32.6017
2607	Q99K28	Q99K28	ADP-ribosylation factor GTPase-activating protein 2	Arfgap2	56.598	7.92053	7		0.139901	0.925315	0.0957142	28.0703	28.2747	5	4	28.2117	28.3763	28.4524	27.6598	27.6515	28.6567	27.8843	27.9342	28.6236	27.7315
2608	Q99K41	Q99K41	EMILIN-1	Emilin1	107.58	9.52731	56		0.0473893	0.988109	-0.0236763	34.4714	34.4477	5	5	34.7304	34.7077	34.4373	34.6698	33.8116	34.3107	34.4782	34.5091	34.4767	34.4639
2609	Q99K48	Q99K48	Non-POU domain-containing octamer-binding protein	Nono	54.54	10.062	41		0.28805	0.909385	0.0813698	34.7538	34.8352	5	5	34.5105	34.7372	34.8363	34.9212	34.764	34.4936	34.7975	34.9633	35.0731	34.8484
2610	Q99K51;Q3V0K9	Q99K51	Plastin-3	Pls3	70.741	9.16599	36		1.41927	0.601461	-0.228967	32.7993	32.5704	5	5	32.8315	32.6257	32.7366	32.9211	32.8818	32.6265	32.572	32.2848	32.6454	32.7231
2613	Q99K85	Q99K85	Phosphoserine aminotransferase	Psat1	40.472	8.60986	14		0.1254	0.929781	0.0997215	29.9468	30.0465	5	5	29.3519	29.3551	30.0305	30.3789	30.6175	29.6939	30.1793	29.9701	30.5667	29.8225
2614	Q99KB8	Q99KB8	Hydroxyacylglutathione hydrolase, mitochondrial	Hagh	34.084	8.62018	6		1.55137	0.550793	0.26119	29.5984	29.8596	5	5	29.7992	29.5109	29.4646	29.7745	29.4427	29.7651	29.7321	30.0583	29.9184	29.8242
2615	Q99KC8	Q99KC8	von Willebrand factor A domain-containing protein 5A	Vwa5a	87.142	8.28153	10		0.984514	0.336739	-0.814455	30.0793	29.2648	5	5	30.1695	30.7491	30.0953	29.2009	30.1816	30.0526	28.3308	28.7776	28.9635	30.1998
2616	Q99KE1	Q99KE1	NAD-dependent malic enzyme, mitochondrial	Me2	65.798	7.99234	3		0.727035	0.439839	0.81588	27.8915	28.4863	4	5	28.8175	28.4505	26.7858	27.1028	27.1954	28.6562	27.7554	27.7394	28.3725	29.9078
2617	Q99KF1	Q99KF1	Transmembrane emp24 domain-containing protein 9	Tmed9	27.127	9.40916	10		1.18902	0.461462	-0.40041	32.1684	31.768	5	5	31.9943	32.2998	32.1972	32.1506	32.1999	32.3151	31.7408	31.6656	31.204	31.9144
2618	Q99KG3	Q99KG3	RNA-binding protein 10	Rbm10	103.49	7.85453	6		0.394124	0.737092	-0.3809	28.5375	28.5587	5	4	28.5139	28.3843	28.9342	28.5338	28.3211	28.3223	28.5118	28.9915	28.4094	26.5479
2620	Q99KI0	Q99KI0	Aconitate hydratase, mitochondrial	Aco2	85.462	8.79635	30		0.348829	0.88838	-0.110509	31.6517	31.5412	5	5	31.5276	31.5719	31.758	31.866	31.5349	31.8586	31.7365	31.4515	31.1646	31.4947
2621	Q99KJ8	Q99KJ8	Dynactin subunit 2	Dctn2	44.116	8.5846	13		0.87679	0.340772	0.993152	29.2818	30.2749	5	5	29.6496	29.8939	30.3154	29.2416	27.3083	30.5024	30.2507	30.1984	31.0789	29.3442
2622	Q99KK2	Q99KK2	N-acylneuraminate cytidylyltransferase	Cmas	48.057	8.11291	6		0.373549	0.745923	-0.381693	28.6486	28.6803	5	4	28.6613	28.5285	28.5023	28.2832	29.2674	28.9035	26.613	28.667	28.4247	28.7262
2623	Q99KK7	Q99KK7	Dipeptidyl peptidase 3	Dpp3	82.897	8.16453	13		0.669445	0.491134	-0.643614	29.4762	28.8326	5	5	29.8323	29.5399	28.602	29.0387	30.3679	28.1296	28.5435	28.1124	29.9171	29.4602
2624	Q99KN2	Q99KN2	Probable cytosolic iron-sulfur protein assembly protein CIAO1	Ciao1	37.632	8.71664	8		0.266301	0.883008	-0.142245	30.216	30.0737	5	5	30.2247	30.1519	30.2333	30.6665	29.8034	29.4982	30.0518	29.94	30.4157	30.4629
2625	Q99KN9	Q99KN9	Clathrin interactor 1	Clint1	68.512	8.97302	13		0.508459	0.787887	0.191624	31.1796	31.3712	5	5	31.3598	30.9324	31.607	31.2877	30.7111	31.433	31.249	31.414	31.1594	31.6007
2627	Q99KP6	Q99KP6	Pre-mRNA-processing factor 19	Prpf19	55.238	9.71812	24		0.240405	0.890412	-0.142136	33.6271	33.485	5	5	33.4786	33.4664	33.3633	34.4229	33.4044	32.935	33.6734	33.6024	33.6141	33.6
2628	Q99KV1	Q99KV1	DnaJ homolog subfamily B member 11	Dnajb11	40.555	9.32901	11		0.507579	0.834569	0.144667	31.9649	32.1095	5	5	32.0953	32.1563	31.8575	31.9798	31.7354	31.8343	31.9346	32.3892	32.0529	32.3368
2631	Q99L04	Q99L04	Dehydrogenase/reductase SDR family member 1	Dhrs1	34.005	8.43234	5		1.06777	0.232904	1.21978	28.908	29.6721	4	5	28.9539	26.6297	30.2051	27.9406	28.5323	29.9495	29.1841	29.5563	30.3064	29.3642
2634	Q99L45	Q99L45	Eukaryotic translation initiation factor 2 subunit 2	Eif2s2	38.092	9.21192	17		0.10388	0.934664	0.116708	31.8035	31.9202	5	5	32.1197	32.0938	32.6755	30.4885	31.6398	32.1307	31.9786	32.2545	31.1414	32.0956
2635	Q99L47	Q99L47	Hsc70-interacting protein	St13	41.655	8.90235	12		1.33749	0.114219	1.88129	29.3002	30.6764	4	5	28.8342	29.4851	30.0519	28.8295	26.7746	29.4834	31.4568	31.3497	31.9691	29.1228
2637	Q99LB2	Q99LB2	Dehydrogenase/reductase SDR family member 4	Dhrs4	29.884	8.09167	5		0.356648	0.761593	0.362622	28.0589	28.2778	4	5	27.3405	27.1471	27.914	28.7381	28.4363	27.3846	28.6764	28.9723	28.7496	27.6063
2638	Q99LB6	Q99LB6	Methionine adenosyltransferase 2 subunit beta	Mat2b	37.392	8.73173	7		0.125095	0.923648	0.116334	30.0324	30.1487	5	5	30.1409	30.2029	29.5242	30.1131	30.1809	28.9617	30.7455	30.7613	30.2216	30.0536
2639	Q99LC2	Q99LC2	Cleavage stimulation factor subunit 1	Cstf1	48.381	8.50278	9		0.301244	0.831844	-0.236798	29.5152	29.2784	5	5	30.3788	29.9362	28.8924	29.2532	29.1154	28.8633	29.0491	29.4497	29.103	29.9269
2640	Q99LC3	Q99LC3	NADH dehydrogenase [ubiquinone] 1 alpha subcomplex subunit 10, mitochondrial	Ndufa10	40.603	8.86539	15		0.141839	0.936524	0.0747822	30.877	30.9518	5	5	31.4128	31.1575	30.6282	30.6597	30.5269	30.667	30.9027	31.1518	31.2303	30.8072
2641	Q99LC5;REV__Q9R1X4	Q99LC5	Electron transfer flavoprotein subunit alpha, mitochondrial	Etfa	35.009	9.49934	23		0.125142	0.945062	0.0711212	32.9581	33.0292	5	5	32.9506	32.6991	32.562	33.397	33.1819	32.5249	33.0664	33.3224	33.3439	32.8887
2643	Q99LD4	Q99LD4	COP9 signalosome complex subunit 1	Gps1	53.442	8.54564	10		0.132511	0.922137	-0.109377	29.5773	29.4679	5	5	29.7682	29.7108	30.0675	28.7748	29.5654	29.8585	29.0299	28.8042	29.8581	29.7891
2644	Q99LD8	Q99LD8	N(G),N(G)-dimethylarginine dimethylaminohydrolase 2	Ddah2	29.645	8.53157	8	+	2.41875	0.0289412	1.40909	28.6988	30.1079	5	5	28.7485	28.3506	29.55	28.6774	28.1677	29.9985	30.038	29.9421	31.0603	29.5008
2646	Q99LE6;REV__Q9DAC9	Q99LE6	ATP-binding cassette sub-family F member 2	Abcf2	71.781	7.98596	11		0.807066	0.397302	-0.867741	28.82	27.9523	5	5	28.5619	27.8813	28.8333	28.7292	30.0943	26.6387	28.263	28.1354	27.5353	29.189
2647	Q99LF4	Q99LF4	tRNA-splicing ligase RtcB homolog	Rtcb	55.249	9.75239	41		0.138166	0.958323	-0.0475227	34.0741	34.0266	5	5	33.9583	33.7179	34.1388	34.2868	34.2686	33.9088	34.1529	34.266	33.8771	33.928
2649	Q99LG2	Q99LG2	Transportin-2	Tnpo2	100.46	7.35984	12		0.153441	0.892618	-0.324149	26.3275	26.0034	5	5	26.6991	27.8811	26.9252	24.4969	25.6353	27.6698	25.8187	24.9369	24.6518	26.9397
2651	Q99LI8	Q99LI8	Hepatocyte growth factor-regulated tyrosine kinase substrate	Hgs	86.014	8.27976	11		0.451519	0.796346	0.19639	29.1583	29.3547	5	5	28.9246	29.2803	29.2817	29.6086	28.6965	29.1649	29.4642	29.4339	29.702	29.0086
2654	Q99LJ6	Q99LJ6	Glutathione peroxidase 7	Gpx7	21.061	9.61576	16		0.45775	0.733385	0.309328	32.5386	32.8479	5	5	32.2896	32.4522	32.8598	32.6233	32.4681	32.3367	32.9538	33.3808	33.5525	32.0158
2657	Q99LL5	Q99LL5	Periodic tryptophan protein 1 homolog	Pwp1	55.586	8.08095	5		0.51463	0.672788	-0.37238	28.519	28.4093	5	4	28.1743	28.5417	28.2436	28.8041	28.8314	28.1353	29.051	28.1606	27.096	28.2905
2658	Q99LM2	Q99LM2	CDK5 regulatory subunit-associated protein 3	Cdk5rap3	56.99	7.64286	3		0.303633	0.762461	-0.539967	27.1572	26.3863	4	4	28.1915	28.363	26.0601	26.0142	26.2256	25.5317	25.4079	26.6095	26.2108	28.3947
2659	Q99LP6	Q99LP6	GrpE protein homolog 1, mitochondrial	Grpel1	24.307	8.35511	7		1.16303	0.209667	1.17195	28.2658	29.061	4	5	28.2486	27.9101	29.5349	27.3698	26.382	29.3343	29.0228	29.6768	28.7337	28.5375
2661	Q99LS3	Q99LS3	Phosphoserine phosphatase	Psph	25.096	8.07298	4	+	2.30573	0.0297067	-1.46972	27.7716	NaN	5	0	27.9095	27.7631	27.7839	27.7052	27.6961	26.0876	26.1092	25.0806	27.1036	27.1283
2662	Q99LX0	Q99LX0	Protein deglycase DJ-1	Park7	20.021	8.56875	9		0.805552	0.476519	0.539223	29.0368	29.576	5	5	28.8007	28.137	29.1245	29.6879	29.4341	28.7872	29.7278	30.0672	29.7627	29.5353
2664	Q99M28	Q99M28	RNA-binding protein with serine-rich domain 1	Rnps1	34.208	8.99578	6		1.41855	0.271739	-0.644088	30.6381	29.994	5	5	30.3482	30.4321	30.2555	31.199	30.9556	29.955	30.0518	29.8431	29.501	30.619
2665	Q99M31	Q99M31	Heat shock 70 kDa protein 14	Hspa14	54.65	8.16447	7		0.0371025	0.987238	0.0284065	28.8834	28.9119	5	5	29.5568	28.6129	29.2164	28.5266	28.5046	28.9293	28.5141	28.5996	29.3798	29.1364
2668	Q99MD9	Q99MD9	Nuclear autoantigenic sperm protein	Nasp	83.953	8.385	10		1.60952	0.257108	0.595232	30.0378	30.633	5	5	29.651	30.2284	30.3575	30.2734	29.6786	30.2256	30.9834	30.9755	30.5576	30.423
2669	Q99ME2	Q99ME2	WD repeat-containing protein 6	Wdr6	121.9	7.65846	2		0.909015	0.334194	0.98043	NaN	28.2765	0	4	27.2457	26.8507	27.1255	25.9339	26.8888	27.7038	28.7132	28.6098	28.0794	25.8405
2670	Q99ME6	Q99ME6	Protein ATP1B4	Atp1b4	41.4	8.26038	4		0.318481	0.741307	0.603113	28.469	28.1571	3	5	29.4636	28.3107	26.0889	26.2743	27.6326	29.3225	26.8258	28.0863	27.2501	29.301
2671	Q99ME9	Q99ME9	Nucleolar GTP-binding protein 1	Gtpbp4	74.112	7.83246	8	+	3.20533	0.006	2.13295	NaN	28.4103	0	5	27.1144	26.753	26.3676	25.4483	25.7033	28.5129	27.8983	28.4444	27.9694	29.2262
2672	Q99MI1	Q99MI1	ELKS/Rab6-interacting/CAST family member 1	Erc1	128.33	7.45283	5		1.89416	0.0788772	1.19029	NaN	28.0087	0	5	27.9493	27.2797	25.9096	26.2751	26.6784	28.1229	28.1557	28.0262	28.0623	27.6765
2673	Q99MJ9	Q99MJ9	ATP-dependent RNA helicase DDX50	Ddx50	82.175	8.01149	12		0.0388714	0.98593	-0.0396191	28.9003	28.8607	5	5	27.8883	28.9252	29.0175	28.9131	29.7573	28.4761	28.3764	29.2155	28.8563	29.3789
2674	Q99MN1	Q99MN1	Lysine--tRNA ligase	Kars	67.839	9.3831	26		0.15569	0.930124	-0.0782021	33.0342	32.9559	5	5	33.1046	33.1131	33.2063	32.8666	32.8801	32.9972	32.5284	32.563	33.4564	33.2348
2677	Q99MQ4	Q99MQ4	Asporin	Aspn	42.572	9.90153	23		1.36399	0.272512	0.66376	33.8292	34.493	5	5	34.2269	33.9525	34.3777	33.077	33.5121	34.4129	34.4966	34.8785	34.645	34.0321
2678	Q99MR6	Q99MR6	Serrate RNA effector molecule homolog	Srrt	100.45	9.07328	32		1.9637	0.207761	0.591287	32.3667	32.958	5	5	32.1582	32.4653	32.7808	32.3663	32.0628	32.6399	33.0862	32.999	33.3447	32.7202
2679	Q99MR8	Q99MR8	Methylcrotonoyl-CoA carboxylase subunit alpha, mitochondrial	Mccc1	79.343	8.34926	11		0.702139	0.749267	-0.197975	30.149	29.951	5	5	30.4259	30.0953	30.008	30.1855	30.03	30.1613	29.8573	29.6829	29.755	30.2983
2684	Q99NB9	Q99NB9	Splicing factor 3B subunit 1	Sf3b1	145.81	8.80488	33		0.252178	0.865114	-0.218412	32.1245	31.9061	5	5	32.4507	32.3793	32.3839	31.3648	32.044	32.6749	31.6544	31.3987	31.2533	32.5493
2687	Q99P72	Q99P72	Reticulon-4	Rtn4	126.61	7.9439	3		0.127224	0.905247	0.246008	28.8958	29.1686	4	4	29.0496	26.9372	29.2439	28.5215	28.7681	30.1402	29.9908	28.8495	27.694	27.0759
2689	Q99P88	Q99P88	Nuclear pore complex protein Nup155	Nup155	155.12	7.62103	8		0.908088	0.473206	-0.479999	28.4373	28.175	5	4	28.278	28.074	28.592	28.4202	28.8224	28.1628	27.8298	27.0866	28.5716	28.1357
2690	Q99PG2	Q99PG2	Opioid growth factor receptor	Ogfr	70.678	8.26956	3		0.0578632	0.968842	0.078717	29.5849	29.6636	5	5	29.4931	30.0074	30.1702	29.7141	28.5396	30.9507	29.729	28.5583	29.2526	29.8275
2691	Q99PL5	Q99PL5	Ribosome-binding protein 1	Rrbp1	172.88	9.91118	110		0.340653	0.874756	0.136024	36.7449	36.881	5	5	36.6288	36.9109	37.1848	36.1832	36.8171	36.7504	36.9296	36.9637	36.987	36.7742
2693	Q99PT1	Q99PT1	Rho GDP-dissociation inhibitor 1	Arhgdia	23.407	10.453	21		0.0622168	0.981114	-0.0320564	34.952	34.9199	5	5	34.9384	34.7162	34.7683	35.2767	35.0602	34.3412	35.0842	35.1299	35.1782	34.866
2694	Q99PV0	Q99PV0	Pre-mRNA-processing-splicing factor 8	Prpf8	273.61	8.59144	65		0.157715	0.907437	-0.142454	32.4406	32.2982	5	5	32.6128	32.9405	32.7151	31.5505	32.3843	33.0845	31.9708	31.8046	31.9009	32.7301
2695	Q9BCZ4	Q9BCZ4	Selenoprotein S	Vimp	21.509	9.20352	2		0.327509	0.901954	0.0897945	30.9825	31.0723	5	5	30.7963	30.9387	31.0192	31.1905	30.9677	31.1289	31.2171	31.1588	31.1797	30.6769
2696	Q9CPN8	Q9CPN8	Insulin-like growth factor 2 mRNA-binding protein 3	Igf2bp3	63.574	8.07365	10		0.638079	0.476303	-0.866649	28.8256	27.9589	5	5	28.6925	28.6062	28.3111	29.5024	29.0158	28.8714	27.4172	25.7748	28.3482	29.3832
2697	Q9CPP0	Q9CPP0	Nucleoplasmin-3	Npm3	19.023	8.45023	5		0.381397	0.774619	0.281509	28.4838	28.5214	4	5	27.2642	28.5655	28.4282	28.8085	28.1331	27.885	28.7723	29.0172	28.4955	28.437
2698	Q9CPQ8	Q9CPQ8	ATP synthase subunit g, mitochondrial	Atp5l	11.424	8.37116	2		1.4389	0.119447	1.43377	NaN	28.1313	0	4	26.4817	28.2922	25.4892	26.3489	25.6252	28.5683	26.8808	27.9023	27.9821	28.0726
2699	Q9CPR4	Q9CPR4	60S ribosomal protein L17	Rpl17	21.423	9.92865	15		0.854384	0.49424	0.446648	32.8591	33.3058	5	5	32.4032	33.3539	33.0847	32.158	33.2957	33.5278	32.9073	33.3258	33.5825	33.1856
2701	Q9CPT3;REV__CON__P02672	Q9CPT3	N-acylneuraminate-9-phosphatase	Nanp	27.808	8.03423	5	+	2.05537	0.0261212	2.11914	NaN	28.7887	0	4	24.9172	26.9036	26.7617	26.145	26.1975	28.3554	28.5881	29.1141	29.0973	26.366
2702	Q9CPT4	Q9CPT4	Myeloid-derived growth factor	Mydgf	17.982	8.72634	4		0.755607	0.395764	1.03418	28.6544	29.1415	4	5	28.4414	25.919	28.5614	28.9109	28.7037	28.4445	28.4079	29.0496	30.7351	29.0701
2703	Q9CPU0	Q9CPU0	Lactoylglutathione lyase	Glo1	20.809	8.81946	6		0.191492	0.891492	0.190011	29.7452	29.9352	5	5	30.5023	30.0852	30.3999	28.9038	28.835	29.6535	29.8885	29.9654	30.4973	29.6715
2704	Q9CPV4	Q9CPV4	Glyoxalase domain-containing protein 4	Glod4	33.316	9.06024	17		1.078	0.444423	0.455115	31.3417	31.7968	5	5	31.1788	31.0287	31.7664	31.5899	31.1447	31.3783	31.7908	32.4528	31.7892	31.5729
2705	Q9CPW4	Q9CPW4	Actin-related protein 2/3 complex subunit 5	Arpc5	16.288	8.95399	4		1.22658	0.273224	0.748043	29.8072	30.5553	5	5	29.6436	30.2202	30.2679	29.4018	29.5026	30.3877	30.8617	31.1274	30.8895	29.5099
2706	Q9CPW5	Q9CPW5	Translocon-associated protein subunit beta	Ssr2	20.019	9.60402	3		1.24722	0.215323	0.951714	30.0479	30.9997	5	5	29.1927	29.3323	30.3051	31.1452	30.2644	30.4822	31.2961	31.7208	30.9651	30.5341
2709	Q9CPY7	Q9CPY7	Cytosol aminopeptidase	Lap3	56.141	8.98432	18		0.298226	0.889854	0.118979	31.7086	31.8275	5	5	31.6589	31.3694	31.6709	31.7924	32.0512	31.5201	31.954	32.0948	32.0558	31.513
2714	Q9CQ26	Q9CQ26	STAM-binding protein	Stambp	48.513	7.94087	6	+	2.77024	0.0216129	1.28042	NaN	27.937	0	5	26.6281	26.7446	26.4735	26.2905	27.146	27.4147	27.8996	27.9113	27.6507	28.8087
2715	Q9CQ48	Q9CQ48	NudC domain-containing protein 2	Nudcd2	17.66	8.57732	5		0.26065	0.812598	0.371742	28.2249	29.0157	5	4	27.6296	27.5254	28.4551	28.7126	28.8017	27.8793	28.9153	29.684	29.5843	26.9202
2717	Q9CQ60	Q9CQ60	6-phosphogluconolactonase	Pgls	27.254	8.89388	11		1.82764	0.0964553	1.12627	29.5684	30.6947	5	5	29.4264	30.4249	30.2003	29.0146	28.7756	30.9012	30.6589	30.9471	30.9133	30.0528
2718	Q9CQ62	Q9CQ62	2,4-dienoyl-CoA reductase, mitochondrial	Decr1	36.213	9.11354	15		0.261772	0.900948	-0.0994835	31.6232	31.5237	5	5	31.7871	31.9665	31.5646	31.5561	31.2418	31.4794	31.3026	31.3193	31.7491	31.7683
2719	Q9CQ65	Q9CQ65	S-methyl-5-thioadenosine phosphorylase	Mtap	31.062	9.33704	16		0.000330869	0.999635	-0.000355911	32.2436	32.2432	5	5	31.4536	32.2278	32.2814	32.7446	32.5105	31.3122	31.8728	32.461	32.6701	32.8998
2722	Q9CQA3	Q9CQA3	Succinate dehydrogenase [ubiquinone] iron-sulfur subunit, mitochondrial	Sdhb	31.814	9.43091	15		1.7039	0.373769	0.405399	32.4362	32.8416	5	5	32.4654	32.4069	32.6395	32.4324	32.2367	32.7686	32.7082	33.0774	33.1643	32.4893
2725	Q9CQC6	Q9CQC6	Basic leucine zipper and W2 domain-containing protein 1	Bzw1	48.043	9.01657	18		0.392622	0.843806	-0.160815	31.6259	31.4651	5	5	31.6799	31.5696	31.794	31.4095	31.6767	31.664	31.475	30.8091	31.6013	31.7762
2726	Q9CQC9	Q9CQC9	GTP-binding protein SAR1b	Sar1b	22.382	8.57922	5		0.0272891	0.986982	0.0581299	28.4877	29.1855	5	4	28.7827	28.988	29.366	27.7444	27.5573	29.4113	29.3479	28.9204	25.9871	29.0623
2728	Q9CQE7	Q9CQE7	Endoplasmic reticulum-Golgi intermediate compartment protein 3	Ergic3	43.208	8.46531	5		0.0184103	0.992658	-0.00984459	28.9346	28.9247	5	5	28.7042	29.2933	28.7165	28.9815	28.9772	29.154	29.3608	28.7251	28.537	28.8467
2730	Q9CQF3	Q9CQF3	Cleavage and polyadenylation specificity factor subunit 5	Nudt21	26.24	8.80653	5	+	2.35265	0.03595	1.2892	29.4617	30.7509	5	5	29.5638	29.9445	29.9724	29.5304	28.2973	30.7689	30.6419	30.6346	31.2115	30.4975
2731	Q9CQF9	Q9CQF9	Prenylcysteine oxidase	Pcyox1	56.494	8.83818	10		0.509765	0.78551	-0.195159	30.9957	30.8005	5	5	30.6264	31.3978	30.9427	30.7641	31.2473	31.0618	30.9039	30.5173	30.9411	30.5784
2733	Q9CQI3	Q9CQI3	Glia maturation factor beta	Gmfb	16.723	8.17892	4		1.69274	0.0622308	1.77921	NaN	27.9505	0	5	26.2213	25.7612	26.4941	25.8233	26.5567	27.4934	28.9688	29.0314	28.4119	25.8472
2734	Q9CQI6	Q9CQI6	Coactosin-like protein	Cotl1	15.944	9.31553	6		0.0995769	0.977891	0.0268627	31.2131	31.24	5	5	31.2239	31.0675	31.2673	31.3622	31.1446	31.2321	31.0723	31.5667	31.1279	31.2008
2736	Q9CQJ4	Q9CQJ4	E3 ubiquitin-protein ligase RING2	Rnf2	37.623	8.55855	6		0.107319	0.957091	0.0610275	29.451	29.512	5	5	29.3826	29.3671	29.9751	29.7329	28.7972	29.495	29.4649	29.6889	29.2716	29.6398
2737	Q9CQJ8	Q9CQJ8	NADH dehydrogenase [ubiquinone] 1 beta subcomplex subunit 9	Ndufb9	21.984	8.83109	8	+	4.24418	0.000888889	2.58532	NaN	29.6789	0	5	27.0804	27.7212	26.9837	26.8265	26.8562	29.5341	30.675	29.715	29.6276	28.843
2738	Q9CQK7	Q9CQK7	RWD domain-containing protein 1	Rwdd1	27.785	8.39733	4		0.0748234	0.959281	0.0755375	28.0189	28.0945	5	5	27.1788	27.6661	28.4412	28.7932	28.0153	27.228	28.3649	28.5223	28.0156	28.3416
2740	Q9CQM9	Q9CQM9	Glutaredoxin-3	Glrx3	37.778	9.25334	21		0.882221	0.533872	0.385876	31.8384	32.2243	5	5	31.7915	31.7915	32.3111	31.8834	31.4145	32.0934	32.3077	32.6194	32.4991	31.6016
2741	Q9CQN1	Q9CQN1	Heat shock protein 75 kDa, mitochondrial	Trap1	80.208	8.56092	20		0.0365728	0.99032	0.0169159	30.7758	30.7927	5	5	31.0967	30.9944	30.5564	30.6671	30.5645	30.3857	30.9158	30.6905	30.9597	31.0121
2742	Q9CQQ7	Q9CQQ7	ATP synthase F(0) complex subunit B1, mitochondrial	Atp5f1	28.948	9.24035	12		0.672832	0.688269	0.263876	31.7427	32.0066	5	5	31.856	31.8186	31.628	32.2167	31.1943	32.2706	32.1529	31.8593	32.0391	31.7111
2744	Q9CQR2	Q9CQR2	40S ribosomal protein S21	Rps21	9.1413	8.54578	3		0.914018	0.39727	0.694575	27.3618	28.0564	5	5	27.2328	26.4279	28.3565	27.4682	27.3238	28.391	27.8724	28.0068	28.7739	27.2379
2745	Q9CQR4	Q9CQR4	Acyl-coenzyme A thioesterase 13;Acyl-coenzyme A thioesterase 13, N-terminally processed	Acot13	15.183	8.54884	4		0.551447	0.548317	0.749386	28.6322	28.7004	3	4	26.7553	27.6435	29.092	26.3698	29.1609	27.967	28.8833	29.5265	28.3713	28.0204
2746	Q9CQR6	Q9CQR6	Serine/threonine-protein phosphatase 6 catalytic subunit;Serine/threonine-protein phosphatase 6 catalytic subunit, N-terminally processed	Ppp6c	35.159	9.02268	11		0.171132	0.902652	0.172285	30.8501	31.0224	5	5	30.7599	30.6199	31.1912	30.6854	30.9941	31.2935	30.5108	29.9001	32.1358	31.2717
2747	Q9CQS3	Q9CQS3	Fin bud initiation factor homolog	Fibin	24.759	8.54903	6		0.204414	0.883535	0.198165	29.2022	29.4004	5	5	29.2691	29.3483	29.4668	29.1018	28.825	28.194	29.7272	30.275	28.9244	29.8812
2748	Q9CQS8	Q9CQS8	Protein transport protein Sec61 subunit beta	Sec61b	9.9583	9.02873	4		0.015455	0.994612	-0.0206566	29.8063	29.3759	4	5	29.5584	30.3209	29.662	27.7575	29.684	29.6302	29.1908	28.9529	29.3159	29.7898
2749	Q9CQT1	Q9CQT1	Methylthioribose-1-phosphate isomerase	Mri1	39.41	8.44281	7		0.538479	0.723855	-0.27014	29.7335	29.4633	5	5	30.2151	30.1957	29.2625	29.5615	29.4325	29.419	29.2209	29.6534	29.8615	29.1618
2752	Q9CQV8	Q9CQV8	14-3-3 protein beta/alpha;14-3-3 protein beta/alpha, N-terminally processed	Ywhab	28.086	9.69776	20		0.4753	0.731242	0.299485	33.0359	33.3354	5	5	32.7029	32.5984	33.2886	33.4821	33.1074	32.9872	33.3607	33.4309	34.1474	32.7505
[truncated: 451 more rows]
